# Supplementary material for: Reported transgenerational responses to Pseudomonas aeruginosa in Caenorhabditis elegans are not robust
Source: eLife. 2025 Mar 26;13:RP100254. doi: 10.7554/eLife.100254 (PMC11942167; doi:10.7554/eLife.100254)
Supplement: Figure 1—figure supplement 1—source data 1. [file elife-100254-fig1-figsupp1-data1.xlsx]

## Sheet: Description
This file contains data on the age of P0 animals at initiation of training.
This file contains the data plotted in Figure 1–figure supplement 1, and Figure 5-figure supplement 2.

## Sheet: 48-52 hour P0's
Experiment	gen	training_cond	OP50_choice	PA14_choice	choice_index	assay_cond	growth temp	paralytic
P0-1	P0	OP50	73	42	0.269565	light	20°C	4°C
P0-1	P0	OP50	47	21	0.382353	light	20°C	4°C
P0-1	P0	OP50	38	20	0.310345	light	20°C	4°C
P0-1	P0	OP50	37	19	0.321429	light	20°C	4°C
P0-1	P0	OP50	33	61	-0.297872	light	20°C	4°C
P0-1	P0	PA14	263	55	0.654088	light	20°C	4°C
P0-1	P0	PA14	156	29	0.686486	light	20°C	4°C
P0-1	P0	PA14	159	37	0.622449	light	20°C	4°C
P0-1	P0	PA14	158	10	0.880952	light	20°C	4°C
P0-1	P0	PA14	53	11	0.65625	light	20°C	4°C
P0-2	P0	OP50	41	36	0.0649351	dark	20°C	4°C
P0-2	P0	OP50	69	44	0.221239	dark	20°C	4°C
P0-2	P0	OP50	40	37	0.038961	dark	20°C	4°C
P0-2	P0	OP50	49	16	0.507692	dark	20°C	4°C
P0-2	P0	OP50	72	33	0.371429	dark	20°C	4°C
P0-2	P0	OP50	63	25	0.431818	dark	20°C	4°C
P0-2	P0	OP50	88	51	0.266187	dark	20°C	4°C
P0-2	P0	OP50	120	53	0.387283	dark	20°C	4°C
P0-2	P0	OP50	102	55	0.299363	dark	20°C	4°C
P0-2	P0	OP50	83	58	0.177305	dark	20°C	4°C
P0-2	P0	PA14	30	2	0.875	dark	20°C	4°C
P0-2	P0	PA14	40	8	0.666667	dark	20°C	4°C
P0-2	P0	PA14	47	13	0.566667	dark	20°C	4°C
P0-2	P0	PA14	27	1	0.928571	dark	20°C	4°C
P0-2	P0	PA14	41	7	0.708333	dark	20°C	4°C
P0-2	P0	PA14	36	8	0.636364	dark	20°C	4°C
P0-2	P0	PA14	58	6	0.8125	dark	20°C	4°C
P0-2	P0	PA14	30	4	0.764706	dark	20°C	4°C
P0-2	P0	PA14	51	15	0.545455	dark	20°C	4°C
P0-2	P0	PA14	51	10	0.672131	dark	20°C	4°C
