# Supplementary material for: Reported transgenerational responses to Pseudomonas aeruginosa in Caenorhabditis elegans are not robust
Source: eLife. 2025 Mar 26;13:RP100254. doi: 10.7554/eLife.100254 (PMC11942167; doi:10.7554/eLife.100254)
Supplement: Figure 2—source data 1. [file elife-100254-fig2-data1.xlsx]

## Sheet: List of Experiments
This file contains data plotted in Figure 1, Figure 2, Figure 2–figure supplement 1 , and Figure 5
Experiment Code	Worm Strain	P-2+ Husbandry Temp	P-1 Husbandry Temp	Maintenance/Training Temp	Age at P0 Training Start	Age of F1/F2s at Imaging	OP50 Isolate	PA14 Isolate	Culture Conditions - Initial Growth	Culture Conditions - OP50 Training	Other Protocol Notes	Other Notes and Errors
FK181_20_H-1	FK181	20C	25C	20C	60hrs	84hrs	Hunter	Hunter	4C OP50, Stock <1 month from start of storage	37C, Undiluted	Vigorous mixing of bleach and embryos with additional washes	P0 initial growth plate showed a small area absent of food (possible local starvation)
QL296_20_H-1	QL296	20C	25C	20C	60hrs	72hrs	Hunter	Hunter	4C OP50, Stock <1 month from start of storage	37C, Undiluted	Vigorous mixing of bleach and embryos with additional washes	OP50 training plates were inverted after drying for ~8hrs, potentially affecting growth conditions
QL296_20_B-1	QL296	20C	25C	20C	50hrs	72hrs	Hunter	Balskus	4C OP50, Stock <1 month from start of storage	37C, Undiluted	Vigorous mixing of bleach and embryos with additional washes	Aperture settings of microscope were slightly readjusted between OP50- and PA14-trained P0s
HC1221_20_B-1	HC1221	20C	25C	20C	48hrs	72hrs	Hunter	Balskus	4C OP50, Stock <1 month from start of storage	37C, Undiluted	Vigorous mixing of bleach and embryos with additional washes	Few F1 animals generated from PA14-trained population
HC1222_20_B-1	HC1222	20C	25C	20C	60hrs	84hrs	Hunter	Balskus	4C OP50, Stock <1 month from start of storage	37C, Undiluted	Vigorous mixing of bleach and embryos with additional washes	Fewer than expected P0 embryos recovered from bleaching; sufficient numbers recovered in subsequent generations
HC1223_20_B-1	HC1223	20C	25C	20C	60hrs	84hrs	Hunter	Balskus	4C OP50, Stock <1 month from start of storage	37C, Undiluted	Vigorous mixing of bleach and embryos with additional washes
HC1218_20_B-1	HC1218	20C	25C	20C	60hrs	84hrs	Hunter	Balskus	4C OP50, Stock <1 month from start of storage	37C, Undiluted	Vigorous mixing of bleach and embryos with additional washes
QL296_25_B-1	QL296	20C	25C	25C	48hrs	72hrs	Hunter	Balskus	4C OP50, Stock <1 month from start of storage	37C, Undiluted	Vigorous mixing of bleach and embryos with additional washes	Planned imaging of F3 animals failed due to mechanical error
QL296_25_B-2	QL296	20C	25C	25C	48hrs	72hrs	Hunter	Balskus	4C OP50, Stock <1 month from start of storage	37C, Undiluted	Vigorous mixing of bleach and embryos with additional washes
QL296_25_B-3	QL296	20C	25C	25C	48hrs	72hrs	Hunter	Balskus	4C OP50, Stock <1 month from start of storage	37C, Undiluted	Vigorous mixing of bleach and embryos with additional washes	P0 & F1 generations not imaged
QL296_25_B-4	QL296	20C	25C	25C	48hrs	72hrs	Hunter	Balskus	4C OP50, Stock <1 month from start of storage	37C, Undiluted	Vigorous mixing of bleach and embryos with additional washes	P0 & F1 generations not imaged
FK181_25_B-1	FK181	20C	25C	25C	48hrs	68hrs	Hunter	Balskus	4C OP50, Stock <1 month from start of storage	37C, Undiluted	Vigorous mixing of bleach and embryos with additional washes
FK181_20_B-1	FK181	20C	25C	20C	54hrs	74hrs	Hunter	Balskus	4C OP50, Stock <1 month from start of storage	37C, Undiluted	Vigorous mixing of bleach and embryos with additional washes	Few F2 animals generated from PA14-trained population; very small contamination spot was present at edge of plate (unlikely to affect imaged animals due to roller phenotype)
FK181_20_B-2	FK181	20C	25C	20C	54hrs	74hrs	Hunter	Balskus	4C OP50, Stock <1 month from start of storage	37C, Undiluted	Vigorous mixing of bleach and embryos with additional washes	Few F2 embryos recovered from PA14-trained population
FK181_25_B-2	FK181	20C	25C	25C	48hrs	70hrs	Hunter	Balskus	4C OP50, Stock <1 month from start of storage	37C, Undiluted	Vigorous mixing of bleach and embryos with additional washes
FK181_25_B-3	FK181	20C	25C	25C	48hrs	70hrs	Hunter	Balskus	4C OP50, Stock <1 month from start of storage	37C, Undiluted	Vigorous mixing of bleach and embryos with additional washes
FK181_(15)20_B-1	FK181	15C	15C	20C	60hrs	84hrs	Hunter	Balskus	4C OP50, Stock <1 month from start of storage	37C, Undiluted	Vigorous mixing of bleach and embryos with additional washes
FK181_(15)20_B-2	FK181	15C	15C	20C	60hrs	84hrs	Hunter	Balskus	4C OP50, Stock <1 month from start of storage	37C, Diluted	Vigorous mixing of bleach and embryos with additional washes
FK181_(15)20_B-3	FK181	15C	15C	20C	60hrs	84hrs	Hunter	Balskus	4C OP50, Stock <1 month from start of storage	37C, Diluted	Vigorous mixing of bleach and embryos with additional washes
FK181_(15)20_B-4	FK181	15C	15C	20C	60hrs	82hrs	Hunter	Balskus	4C OP50, Stock <1 month from start of storage	37C, Diluted	Vigorous mixing of bleach and embryos with additional washes; Bacteria freshly streaked from glycerol; Did not use Triton
FK181_(15)20_B-5	FK181	15C	15C	20C	60hrs	82hrs	Hunter	Balskus	4C OP50, Stock <1 month from start of storage	37C, Diluted	Vigorous mixing of bleach and embryos with additional washes; Bacteria freshly streaked from glycerol; Did not use Triton
FK181_20_B-3	FK181	20C	20C	20C	60hrs	70hrs	Hunter	Balskus	4C OP50, Stock <1 week from start of storage	4C, Undiluted	No centrifuging adults prior to adding bleach solution; Fresh HG OP50 plates (1-3 days post seeding) used for initial growth; Bacteria freshly streaked from glycerol; Did not use Triton	Few F2 animals generated from PA14-trained population
FK181_20_M-1	FK181	20C	20C	20C	60hrs	70hrs	Murphy	Murphy	4C OP50, Stock <1 week from start of storage	4C, Undiluted	No centrifuging adults prior to adding bleach solution; Fresh HG OP50 plates (1-3 days post seeding) used for initial growth; Bacteria freshly streaked from glycerol; Did not use Triton	Very few F2 animals generated from PA14-trained population
FK181_20_M-2	FK181	20C	20C	20C	60hrs	70hrs	Murphy	Murphy	4C OP50, Stock <1 week from start of storage	4C, Undiluted	No centrifuging adults prior to adding bleach solution; Fresh HG OP50 plates (1-3 days post seeding) used for initial growth; Bacteria freshly streaked from glycerol; Did not use Triton	Very few F2 animals generated from PA14-trained population
FK181_20_M-3	FK181	20C	20C	20C	58hrs	82hrs	Murphy	Murphy	4C OP50, Stock <1 week from start of storage	4C, Undiluted	No centrifuging adults prior to adding bleach solution; Fresh HG OP50 plates (1-3 days post seeding) used for initial growth; Bacteria freshly streaked from glycerol; Did not use Triton

## Sheet: FK181_20_H-1
Experiment Code	Condition	Animal	Background 1	Background 2	Neuron 1 - Mean Brightness	Neuron 2 - Mean Brightness	Neuron 1 - Background Normalized	Neuron 2 - Background Normalized
FK181_20_H-1	P0_OP50	1	407.438	407.438	433.654	471.29	26.216	63.852
FK181_20_H-1	P0_OP50	2	407.357	407.357	449.308	615.821	41.951	208.464
FK181_20_H-1	P0_OP50	3	407.459	407.459	468.995	452.841	61.536	45.382
FK181_20_H-1	P0_OP50	4	407.417	407.417	430.004	435.91	22.587	28.493
FK181_20_H-1	P0_OP50	5	407.394	407.394	490.626	455.059	83.232	47.665
FK181_20_H-1	P0_OP50	6	407.372	407.372	442.802	471.809	35.43	64.437
FK181_20_H-1	P0_OP50	7	407.507	407.507	435.89	480.744	28.383	73.237
FK181_20_H-1	P0_OP50	8	407.525	407.525	491.974	461.075	84.449	53.55
FK181_20_H-1	P0_OP50	9	407.644	407.644	455.453	492.956	47.809	85.312
FK181_20_H-1	P0_OP50	10	407.353	407.353	426.977	444.432	19.624	37.079
FK181_20_H-1	P0_OP50	11	407.57	407.57	625.121	427.875	217.551	20.305
FK181_20_H-1	P0_OP50	12	407.428	407.428	486.086	473.896	78.658	66.468
FK181_20_H-1	P0_OP50	13	407.358	407.358	420.174	414.735	12.816	7.377
FK181_20_H-1	P0_OP50	14	407.539	407.539	480.888	476.429	73.349	68.89
FK181_20_H-1	P0_OP50	15	407.48	407.48	515.375	459.731	107.895	52.251
FK181_20_H-1	P0_OP50	16	407.317	407.317	516.146	478.808	108.829	71.491
FK181_20_H-1	P0_OP50	17	407.314	407.314	466.685	421.659	59.371	14.345
FK181_20_H-1	P0_OP50	18	407.291	407.291	463.925	440.882	56.634	33.591
FK181_20_H-1	P0_OP50	19	407.266	407.266	490.851	423.296	83.585	16.03
FK181_20_H-1	P0_OP50	20	407.316	407.316	442.554	454.452	35.238	47.136
FK181_20_H-1	P0_OP50	21	407.295	407.295	436.792	481.991	29.497	74.696
FK181_20_H-1	P0_OP50	22	407.177	407.177	453.873	501.701	46.696	94.524
FK181_20_H-1	P0_OP50	23	407.441	407.441	423.642	536.845	16.201	129.404
FK181_20_H-1	P0_OP50	24	407.403	407.403	472.686	464.439	65.283	57.036
FK181_20_H-1	P0_OP50	25	407.213	407.213	448.282	462.869	41.069	55.656
FK181_20_H-1	P0_OP50	26	407.348	407.348	515.053	610.48	107.705	203.132
FK181_20_H-1	P0_PA14	1	407.299	407.299	947.825	504.872	540.526	97.573
FK181_20_H-1	P0_PA14	2	407.266	407.266	614.293	598.718	207.027	191.452
FK181_20_H-1	P0_PA14	3	407.496	407.496	480.139	624.279	72.643	216.783
FK181_20_H-1	P0_PA14	4	407.338	407.338	456.373	510.69	49.035	103.352
FK181_20_H-1	P0_PA14	5	407.296	407.296	438.996	443.469	31.7	36.173
FK181_20_H-1	P0_PA14	6	407.449	407.449	557.867	510.961	150.418	103.512
FK181_20_H-1	P0_PA14	7	407.443	407.443	675.532	531.354	268.089	123.911
FK181_20_H-1	P0_PA14	8	407.599	407.599	661.633	693.268	254.034	285.669
FK181_20_H-1	P0_PA14	9	407.404	407.404	814.846	651.081	407.442	243.677
FK181_20_H-1	P0_PA14	10	407.544	407.544	683.156	738.427	275.612	330.883
FK181_20_H-1	P0_PA14	11	407.416	407.416	553.15	445.891	145.734	38.475
FK181_20_H-1	P0_PA14	12	407.456	407.456	690.799	896.951	283.343	489.495
FK181_20_H-1	P0_PA14	13	407.653	407.653	572.248	723.866	164.595	316.213
FK181_20_H-1	P0_PA14	14	407.401	407.401	562.287	575.887	154.886	168.486
FK181_20_H-1	P0_PA14	15	407.313	407.313	451.559	441.568	44.246	34.255
FK181_20_H-1	P0_PA14	16	407.396	407.396	442.558	473.663	35.162	66.267
FK181_20_H-1	P0_PA14	17	407.462	407.462	543.95	545.885	136.488	138.423
FK181_20_H-1	P0_PA14	18	407.44	407.44	489.955	467.306	82.515	59.866
FK181_20_H-1	P0_PA14	19	407.397	407.397	463.992	479.75	56.595	72.353
FK181_20_H-1	P0_PA14	20	407.333	407.333	474.666	420.822	67.333	13.489
FK181_20_H-1	P0_PA14	21	407.377	407.377	682.244	549.448	274.867	142.071
FK181_20_H-1	P0_PA14	22	407.393	407.393	457.621	418.643	50.228	11.25
FK181_20_H-1	P0_PA14	23	407.266	407.266	472.466	535.408	65.2	128.142
FK181_20_H-1	P0_PA14	24	407.404	407.404	544.926	782.988	137.522	375.584
FK181_20_H-1	P0_PA14	25	407.436	407.436	633.561	542.989	226.125	135.553
FK181_20_H-1	P0_PA14	26	407.561	407.561	433.923	565.707	26.362	158.146
FK181_20_H-1	P0_PA14	27	407.299	407.299	488.095	491.614	80.796	84.315
FK181_20_H-1	F1_OP50	1	407.357	407.357	416.755	417.724	9.398	10.367
FK181_20_H-1	F1_OP50	2	407.303	407.303	412.989	409.262	5.686	1.959
FK181_20_H-1	F1_OP50	3	407.282	407.282	425.457	411.336	18.175	4.054
FK181_20_H-1	F1_OP50	4	407.321	407.321	432.404	414.281	25.083	6.96
FK181_20_H-1	F1_OP50	5	407.3	407.3	420.875	413.924	13.575	6.624
FK181_20_H-1	F1_OP50	6	407.329	407.329	426.925	411.061	19.596	3.732
FK181_20_H-1	F1_OP50	7	407.289	407.289	420.927	416.319	13.638	9.03
FK181_20_H-1	F1_OP50	8	407.313	407.313	418.353	413.485	11.04	6.172
FK181_20_H-1	F1_OP50	9	407.226	407.226	454.931	415.627	47.705	8.401
FK181_20_H-1	F1_OP50	10	407.285	407.285	565.231	493.183	157.946	85.898
FK181_20_H-1	F1_OP50	11	407.287	407.287	423.468	408.624	16.181	1.337
FK181_20_H-1	F1_OP50	12	407.352	407.352	412.248	414.554	4.896	7.202
FK181_20_H-1	F1_OP50	13	407.246	407.246	410.95	412.893	3.704	5.647
FK181_20_H-1	F1_OP50	14	407.328	407.328	423.065	414.285	15.737	6.957
FK181_20_H-1	F1_OP50	15	407.254	407.254	420.087	412.649	12.833	5.395
FK181_20_H-1	F1_OP50	16	407.312	407.312	428.124	412.789	20.812	5.477
FK181_20_H-1	F1_OP50	17	407.363	407.363	418.021	419.026	10.658	11.663
FK181_20_H-1	F1_OP50	18	407.411	407.411	418.278	420.623	10.867	13.212
FK181_20_H-1	F1_OP50	19	407.364	407.364	411.116	409.842	3.752	2.478
FK181_20_H-1	F1_OP50	20	407.413	407.413	418.597	409.6	11.184	2.187
FK181_20_H-1	F1_OP50	21	407.323	407.323	428.234	417.768	20.911	10.445
FK181_20_H-1	F1_OP50	22	407.388	407.388	444.467	416.445	37.079	9.057
FK181_20_H-1	F1_OP50	23	407.381	407.381	413.645	419.411	6.264	12.03
FK181_20_H-1	F1_OP50	24	407.44	407.44	418.828	414.635	11.388	7.195
FK181_20_H-1	F1_OP50	25	407.363	407.363	435.768	415.7	28.405	8.337
FK181_20_H-1	F1_OP50	26	407.321	407.321	458.305	412.855	50.984	5.534
FK181_20_H-1	F1_OP50	27	407.332	407.332	418.412	420.272	11.08	12.94
FK181_20_H-1	F1_OP50	28	407.432	407.432	417.798	443.802	10.366	36.37
FK181_20_H-1	F1_OP50	29	407.381	407.381	426.369	418.01	18.988	10.629
FK181_20_H-1	F1_OP50	30	407.481	407.481	431.807	432.837	24.326	25.356
FK181_20_H-1	F1_OP50	31	407.476	407.476	419.741	420.371	12.265	12.895
FK181_20_H-1	F1_OP50	32	407.424	407.424	435.83	411.919	28.406	4.495
FK181_20_H-1	F1_OP50	33	407.42	407.42	426.309	413.762	18.889	6.342
FK181_20_H-1	F1_OP50	34	407.479	407.479	559.351	445.606	151.872	38.127
FK181_20_H-1	F1_OP50	35	407.341	407.341	442.281	422.327	34.94	14.986
FK181_20_H-1	F1_PA14	1	407.38	407.38	481.283	417.848	73.903	10.468
FK181_20_H-1	F1_PA14	2	407.11	407.11	456.243	436.475	49.133	29.365
FK181_20_H-1	F1_PA14	3	407.209	407.209	524.916	542.706	117.707	135.497
FK181_20_H-1	F1_PA14	4	407.17	407.17	479.315	416.307	72.145	9.137
FK181_20_H-1	F1_PA14	5	407.254	407.254	474.598	517.973	67.344	110.719
FK181_20_H-1	F1_PA14	6	407.159	407.159	464.735	482.695	57.576	75.536
FK181_20_H-1	F1_PA14	7	407.274	407.274	429.171	445.931	21.897	38.657
FK181_20_H-1	F1_PA14	8	407.408	407.408	567.784	459.702	160.376	52.294
FK181_20_H-1	F1_PA14	9	407.281	407.281	413.876	427.407	6.595	20.126
FK181_20_H-1	F1_PA14	10	407.275	407.275	421.123	413.001	13.848	5.726
FK181_20_H-1	F1_PA14	11	407.346	407.346	773.319	694.032	365.973	286.686
FK181_20_H-1	F1_PA14	13	407.264	407.264	435.095	436.911	27.831	29.647
FK181_20_H-1	F1_PA14	14	407.112	407.112	424.906	417.785	17.794	10.673
FK181_20_H-1	F1_PA14	15	407.179	407.179	484.225	454.96	77.046	47.781
FK181_20_H-1	F1_PA14	16	407.22	407.22	466.849	504.722	59.629	97.502
FK181_20_H-1	F1_PA14	17	407.327	407.327	455.268	464.2	47.941	56.873
FK181_20_H-1	F1_PA14	18	407.294	407.294	488.327	816.298	81.033	409.004
FK181_20_H-1	F1_PA14	19	407.388	407.388	435.63	432.901	28.242	25.513
FK181_20_H-1	F1_PA14	20	407.349	407.349	463.801	440.605	56.452	33.256
FK181_20_H-1	F1_PA14	21	407.228	407.228	658.909	631.44	251.681	224.212
FK181_20_H-1	F1_PA14	22	407.224	407.224	455.333	460.591	48.109	53.367
FK181_20_H-1	F1_PA14	23	407.33	407.33	484.536	451.056	77.206	43.726
FK181_20_H-1	F1_PA14	24	407.295	407.295	455.827	520.845	48.532	113.55
FK181_20_H-1	F1_PA14	25	407.337	407.337	424.182	426.447	16.845	19.11
FK181_20_H-1	F1_PA14	26	407.45	407.45	612.495	896.912	205.045	489.462
FK181_20_H-1	F1_PA14	27	407.418	407.418	465.793	471.623	58.375	64.205
FK181_20_H-1	F1_PA14	28	407.427	407.427	514.547	580.342	107.12	172.915
FK181_20_H-1	F1_PA14	29	407.178	407.178	429.341	416.511	22.163	9.333
FK181_20_H-1	F1_PA14	30	407.436	407.436	792.385	817.46	384.949	410.024
FK181_20_H-1	F2_OP50	1	407.263	407.263	438.2	416.347	30.937	9.084
FK181_20_H-1	F2_OP50	2	407.305	407.305	536.905	410.132	129.6	2.827
FK181_20_H-1	F2_OP50	3	407.279	407.279	439.431	414.798	32.152	7.519
FK181_20_H-1	F2_OP50	4	407.237	407.237	445.818	419.442	38.581	12.205
FK181_20_H-1	F2_OP50	5	407.231	407.231	468.376	417.615	61.145	10.384
FK181_20_H-1	F2_OP50	6	407.294	407.294	445.567	510.433	38.273	103.139
FK181_20_H-1	F2_OP50	7	407.455	407.455	566.717	442.507	159.262	35.052
FK181_20_H-1	F2_OP50	8	407.251	407.251	451.988	417.25	44.737	9.999
FK181_20_H-1	F2_OP50	9	407.252	407.252	448.582	413.791	41.33	6.539
FK181_20_H-1	F2_OP50	10	407.112	407.112	456.115	412.764	49.003	5.652
FK181_20_H-1	F2_OP50	11	407.308	407.308	436.402	421.296	29.094	13.988
FK181_20_H-1	F2_OP50	12	407.331	407.331	423.761	429.874	16.43	22.543
FK181_20_H-1	F2_OP50	13	407.182	407.182	513.619	430.856	106.437	23.674
FK181_20_H-1	F2_OP50	14	407.359	407.359	497.115	483.865	89.756	76.506
FK181_20_H-1	F2_OP50	15	407.267	407.267	422.774	410.689	15.507	3.422
FK181_20_H-1	F2_OP50	16	407.154	407.154	412.957	416.625	5.803	9.471
FK181_20_H-1	F2_OP50	17	407.228	407.228	419.355	410.41	12.127	3.182
FK181_20_H-1	F2_OP50	18	407.195	407.195	444.718	456.522	37.523	49.327
FK181_20_H-1	F2_OP50	19	407.175	407.175	423.433	466.442	16.258	59.267
FK181_20_H-1	F2_OP50	20	406.957	406.957	450.966	418.475	44.009	11.518
FK181_20_H-1	F2_OP50	21	407.242	407.242	414.955	416.554	7.713	9.312
FK181_20_H-1	F2_OP50	22	407.195	407.195	426.518	411.108	19.323	3.913
FK181_20_H-1	F2_OP50	23	406.856	406.856	418.874	422.61	12.018	15.754
FK181_20_H-1	F2_OP50	24	407.067	407.067	426.022	418.509	18.955	11.442
FK181_20_H-1	F2_OP50	25	406.883	406.883	448.101	416.238	41.218	9.355
FK181_20_H-1	F2_OP50	27	407.39	407.39	417.32	789.979	9.93	382.589
FK181_20_H-1	F2_OP50	28	407.081	407.081	413.622	412.703	6.541	5.622
FK181_20_H-1	F2_PA14	1	407.224	407.224	461.781	434.492	54.557	27.268
FK181_20_H-1	F2_PA14	2	407.241	407.241	435.077	420.929	27.836	13.688
FK181_20_H-1	F2_PA14	3	407.07	407.07	414.957	413.219	7.887	6.149
FK181_20_H-1	F2_PA14	4	407.158	407.158	434.915	426.805	27.757	19.647
FK181_20_H-1	F2_PA14	5	407.149	407.149	432.195	433.517	25.046	26.368
FK181_20_H-1	F2_PA14	6	406.963	406.963	456.1	418.572	49.137	11.609
FK181_20_H-1	F2_PA14	7	406.855	406.855	425.762	409.648	18.907	2.793
FK181_20_H-1	F2_PA14	8	407.005	407.005	436.07	415.654	29.065	8.649
FK181_20_H-1	F2_PA14	9	407.1	407.1	474.44	487.525	67.34	80.425
FK181_20_H-1	F2_PA14	10	407.338	407.338	419.591	431.709	12.253	24.371
FK181_20_H-1	F2_PA14	11	406.971	406.971	447.667	426.84	40.696	19.869
FK181_20_H-1	F2_PA14	12	407.265	407.265	412.583	416.693	5.318	9.428
FK181_20_H-1	F2_PA14	13	407.25	407.25	414.248	451.056	6.998	43.806
FK181_20_H-1	F2_PA14	15	407.25	407.25	428.985	427.878	21.735	20.628
FK181_20_H-1	F2_PA14	16	407.229	407.229	443.947	428.608	36.718	21.379
FK181_20_H-1	F2_PA14	17	407.237	407.237	466.067	433.913	58.83	26.676
FK181_20_H-1	F2_PA14	18	407.01	407.01	421.284	417.109	14.274	10.099
FK181_20_H-1	F2_PA14	19	407.132	407.132	423.128	433.367	15.996	26.235
FK181_20_H-1	F2_PA14	20	406.967	406.967	436.114	440.751	29.147	33.784
FK181_20_H-1	F2_PA14	21	407.242	407.242	454.225	423.558	46.983	16.316
FK181_20_H-1	F2_PA14	22	407.197	407.197	427.504	415.895	20.307	8.698
FK181_20_H-1	F2_PA14	23	406.883	406.883	449.773	438.183	42.89	31.3
FK181_20_H-1	F2_PA14	24	407.034	407.034	422.016	418.164	14.982	11.13
FK181_20_H-1	F2_PA14	25	406.849	406.849	476.033	421.147	69.184	14.298
FK181_20_H-1	F2_PA14	26	407.175	407.175	417.002	416.626	9.827	9.451

## Sheet: QL296_20_H-1
Experiment Code	Condition	Animal	Background 1	Background 2	Neuron 1 - Mean Brightness	Neuron 2 - Mean Brightness	Neuron 1 - Background Normalized	Neuron 2 - Background Normalized
QL296_20_H-1	F1_OP50	1	5.901	3.2	49.745	48.056	43.844	44.856
QL296_20_H-1	F1_OP50	2	6.113	3.475	103.449	107.627	97.336	104.152
QL296_20_H-1	F1_OP50	3	7.042	7.042	97.081	33.664	90.039	26.622
QL296_20_H-1	F1_OP50	4	7.218	7.218	70.218	50.697	63	43.479
QL296_20_H-1	F1_OP50	5	6.557	6.557	43.79	59.153	37.233	52.596
QL296_20_H-1	F1_OP50	6	7.658	7.658	111.379	135.223	103.721	127.565
QL296_20_H-1	F1_OP50	7	6.934	3.542	81.346	63.432	74.412	59.89
QL296_20_H-1	F1_OP50	8	8.079	3.113	96.269	31.527	88.19	28.414
QL296_20_H-1	F1_OP50	10	6.847	4.039	57.839	40.534	50.992	36.495
QL296_20_H-1	F1_OP50	11	6.725	3.041	105.006	42.157	98.281	39.116
QL296_20_H-1	F1_OP50	12	7.154	7.154	97.885	52.322	90.731	45.168
QL296_20_H-1	F1_OP50	13	6.616	6.616	46.488	59.199	39.872	52.583
QL296_20_H-1	F1_OP50	14	7.627	7.627	44.973	105.964	37.346	98.337
QL296_20_H-1	F1_OP50	15	6.446	3.796	98.062	52.221	91.616	48.425
QL296_20_H-1	F1_OP50	16	7.039	7.039	83.445	71.94	76.406	64.901
QL296_20_H-1	F1_OP50	17	6.848	3.458	116.004	45.176	109.156	41.718
QL296_20_H-1	F1_OP50	18	9.312	4.326	73.805	20.976	64.493	16.65
QL296_20_H-1	F1_OP50	19	7.009	3.612	95.399	36.852	88.39	33.24
QL296_20_H-1	F1_OP50	20	7.121	7.121	49.28	70.016	42.159	62.895
QL296_20_H-1	F2_OP50	1	7.772	4.584	120.01	43.74	112.238	39.156
QL296_20_H-1	F2_OP50	2	8.238	8.238	92.889	60.121	84.651	51.883
QL296_20_H-1	F2_OP50	3	8.083	8.083	102.846	56.846	94.763	48.763
QL296_20_H-1	F2_OP50	4	7.445	7.445	90.38	31.177	82.935	23.732
QL296_20_H-1	F2_OP50	6	6.964	3.409	66.314	33.789	59.35	30.38
QL296_20_H-1	F2_OP50	8	7.136	7.136	71.998	81.284	64.862	74.148
QL296_20_H-1	F2_OP50	9	7.881	7.881	155.273	78.414	147.392	70.533
QL296_20_H-1	F2_OP50	10	7.249	2.787	108.928	59.358	101.679	56.571
QL296_20_H-1	F2_OP50	11	4.576	4.576	71.372	25.476	66.796	20.9
QL296_20_H-1	F2_OP50	12	6.906	4.057	156.084	96.618	149.178	92.561
QL296_20_H-1	F2_OP50	13	7.823	7.823	76.86	43.529	69.037	35.706
QL296_20_H-1	F2_OP50	14	7.031	3.902	126.85	52.35	119.819	48.448
QL296_20_H-1	F2_OP50	15	7.547	3.353	118.193	68.753	110.646	65.4
QL296_20_H-1	F2_OP50	16	7.832	7.832	66.324	55.574	58.492	47.742
QL296_20_H-1	F2_OP50	17	7.348	7.348	82.737	38.406	75.389	31.058
QL296_20_H-1	F2_OP50	18	6.98	3.898	158.924	53.137	151.944	49.239
QL296_20_H-1	F2_OP50	19	7.061	4.005	87.209	48.559	80.148	44.554
QL296_20_H-1	F2_OP50	20	6.602	6.602	67.924	108.701	61.322	102.099
QL296_20_H-1	F2_OP50	21	6.752	6.752	74.906	103.449	68.154	96.697
QL296_20_H-1	F2_OP50	22	7.985	7.985	179.277	173.054	171.292	165.069
QL296_20_H-1	F2_OP50	23	8.014	8.014	27.726	90.538	19.712	82.524
QL296_20_H-1	F2_OP50	24	7.699	7.699	41.189	83.883	33.49	76.184
QL296_20_H-1	F2_OP50	26	8.606	8.606	74.443	22.985	65.837	14.379
QL296_20_H-1	P0_OP50	1	7.176	7.176	77.372	83.586	70.196	76.41
QL296_20_H-1	P0_OP50	2	7.05	7.05	50.626	54.822	43.576	47.772
QL296_20_H-1	P0_OP50	3	8.327	8.327	72.035	19.897	63.708	11.57
QL296_20_H-1	P0_OP50	4	6.466	3.4	127.716	60.622	121.25	57.222
QL296_20_H-1	P0_OP50	5	7.314	7.314	107.397	31.008	100.083	23.694
QL296_20_H-1	P0_OP50	6	7.04	3.104	90.676	28.614	83.636	25.51
QL296_20_H-1	P0_OP50	7	6.97	3.414	138.442	31.506	131.472	28.092
QL296_20_H-1	P0_OP50	8	7.545	7.545	125.156	42.731	117.611	35.186
QL296_20_H-1	P0_OP50	9	7.205	3.035	150.173	44.305	142.968	41.27
QL296_20_H-1	P0_OP50	10	6.861	3.462	127.567	31.797	120.706	28.335
QL296_20_H-1	P0_OP50	11	7.841	4.11	163.411	66.133	155.57	62.023
QL296_20_H-1	P0_OP50	12	7.184	7.184	189.876	54.937	182.692	47.753
QL296_20_H-1	P0_OP50	13	7.072	3.356	131.045	26.986	123.973	23.63
QL296_20_H-1	P0_OP50	14	6.775	3.195	102.88	46.041	96.105	42.846
QL296_20_H-1	P0_OP50	15	7.427	3.101	169.706	36.201	162.279	33.1
QL296_20_H-1	P0_OP50	16	6.63	2.89	119.251	35.802	112.621	32.912
QL296_20_H-1	P0_OP50	17	7.037	7.037	125.432	62.972	118.395	55.935
QL296_20_H-1	P0_OP50	18	7.016	2.452	135.934	34.401	128.918	31.949
QL296_20_H-1	P0_OP50	19	7.44	7.44	87.686	34.887	80.246	27.447
QL296_20_H-1	P0_OP50	20	6.984	6.984	129.307	90.093	122.323	83.109
QL296_20_H-1	P0_OP50	21	7.814	7.814	116.96	46.55	109.146	38.736
QL296_20_H-1	P0_OP50	22	6.574	3.805	111.131	28.658	104.557	24.853
QL296_20_H-1	P0_OP50	23	6.889	3.395	96.553	40.506	89.664	37.111
QL296_20_H-1	F1_PA14	1	7.729	7.729	116.237	77.315	108.508	69.586
QL296_20_H-1	F1_PA14	2	9.472	9.472	140.684	35.671	131.212	26.199
QL296_20_H-1	F1_PA14	3	7.058	3.602	140.573	61.842	133.515	58.24
QL296_20_H-1	F1_PA14	5	7.706	4.548	161.955	111.911	154.249	107.363
QL296_20_H-1	F1_PA14	6	7.108	3.593	88.478	41.609	81.37	38.016
QL296_20_H-1	F1_PA14	7	6.7	3.042	88.961	44.219	82.261	41.177
QL296_20_H-1	F1_PA14	8	9.095	9.095	147.835	80.754	138.74	71.659
QL296_20_H-1	F1_PA14	9	7.281	3.178	89.599	88.464	82.318	85.286
QL296_20_H-1	F1_PA14	10	9.701	9.701	118.124	144.531	108.423	134.83
QL296_20_H-1	F1_PA14	11	7.857	7.857	107.25	31.506	99.393	23.649
QL296_20_H-1	F1_PA14	12	6.717	4.198	172.633	140.53	165.916	136.332
QL296_20_H-1	F1_PA14	13	6.677	3.796	118.145	66.972	111.468	63.176
QL296_20_H-1	F1_PA14	14	7.517	2.963	137.192	70.565	129.675	67.602
QL296_20_H-1	F1_PA14	15	6.752	3.99	100.276	38.178	93.524	34.188
QL296_20_H-1	F1_PA14	16	8.079	8.079	98.881	43.598	90.802	35.519
QL296_20_H-1	F1_PA14	17	8.22	4.524	75.578	74.39	67.358	69.866
QL296_20_H-1	F1_PA14	18	6.964	2.949	134.942	53.892	127.978	50.943
QL296_20_H-1	F1_PA14	19	7.298	2.944	87.658	71.044	80.36	68.1
QL296_20_H-1	F1_PA14	20	8.451	8.451	98.545	86.462	90.094	78.011
QL296_20_H-1	F1_PA14	21	8.029	8.029	155.761	87.785	147.732	79.756
QL296_20_H-1	F1_PA14	22	8.108	8.108	114.084	51.43	105.976	43.322
QL296_20_H-1	F1_PA14	23	6.903	3.578	114.259	51.541	107.356	47.963
QL296_20_H-1	F1_PA14	24	7.377	2.365	95.378	94.677	88.001	92.312
QL296_20_H-1	F1_PA14	25	7.022	2.994	155.198	140.282	148.176	137.288
QL296_20_H-1	F2_PA14	1	7.169	3.005	105.329	53.604	98.16	50.599
QL296_20_H-1	F2_PA14	2	7.818	7.818	179.901	114.451	172.083	106.633
QL296_20_H-1	F2_PA14	3	7.748	7.748	81.825	27.972	74.077	20.224
QL296_20_H-1	F2_PA14	4	7.169	3.106	58.317	32.165	51.148	29.059
QL296_20_H-1	F2_PA14	5	6.952	3.066	108.419	48.841	101.467	45.775
QL296_20_H-1	F2_PA14	6	7.832	7.832	66.572	85.08	58.74	77.248
QL296_20_H-1	F2_PA14	7	7.777	7.777	147.739	86.852	139.962	79.075
QL296_20_H-1	F2_PA14	8	7.333	7.333	51.281	55.892	43.948	48.559
QL296_20_H-1	F2_PA14	9	7.402	7.402	52.545	56.907	45.143	49.505
QL296_20_H-1	F2_PA14	10	7.271	7.271	116.401	68.165	109.13	60.894
QL296_20_H-1	F2_PA14	11	7.489	7.489	83.681	75.469	76.192	67.98
QL296_20_H-1	F2_PA14	12	7.84	7.84	62.98	49.642	55.14	41.802
QL296_20_H-1	F2_PA14	13	6.922	3.37	51.689	51.685	44.767	48.315
QL296_20_H-1	F2_PA14	14	7.393	2.897	87.746	32.791	80.353	29.894
QL296_20_H-1	F2_PA14	15	7.867	7.867	50.501	59.323	42.634	51.456
QL296_20_H-1	F2_PA14	16	7.362	7.362	60.58	62.73	53.218	55.368
QL296_20_H-1	F2_PA14	17	7.255	7.255	105.676	120.113	98.421	112.858
QL296_20_H-1	F2_PA14	18	7.231	2.868	79.863	57.078	72.632	54.21
QL296_20_H-1	F2_PA14	19	7.405	7.405	83.622	32.069	76.217	24.664
QL296_20_H-1	F2_PA14	20	7.269	7.269	144.406	134.215	137.137	126.946
QL296_20_H-1	F2_PA14	21	9.167	9.167	74.039	44.6	64.872	35.433
QL296_20_H-1	F2_PA14	22	7.645	7.645	61.568	19.822	53.923	12.177
QL296_20_H-1	F2_PA14	23	7.812	2.591	140.901	48.791	133.089	46.2
QL296_20_H-1	F2_PA14	24	7.218	2.988	42.681	31.054	35.463	28.066
QL296_20_H-1	F2_PA14	25	7.549	7.549	62.353	93.245	54.804	85.696
QL296_20_H-1	F2_PA14	26	7.006	3.636	91.226	76.841	84.22	73.205
QL296_20_H-1	F2_PA14	27	7.564	7.564	169.219	60.124	161.655	52.56
QL296_20_H-1	F2_PA14	28	6.888	3.314	74.052	41.448	67.164	38.134
QL296_20_H-1	P0_PA14	1	7.286	7.286	130.921	74.891	123.635	67.605
QL296_20_H-1	P0_PA14	2	6.556	6.556	125.024	115.425	118.468	108.869
QL296_20_H-1	P0_PA14	3	8.94	8.94	104.685	36.86	95.745	27.92
QL296_20_H-1	P0_PA14	4	7.161	7.161	104.385	114.296	97.224	107.135
QL296_20_H-1	P0_PA14	5	7.807	7.807	47.196	65.801	39.389	57.994
QL296_20_H-1	P0_PA14	6	8.51	8.51	167.274	75.115	158.764	66.605
QL296_20_H-1	P0_PA14	7	5.823	4.285	132.244	121.407	126.421	117.122
QL296_20_H-1	P0_PA14	8	8.195	8.195	127.812	61.87	119.617	53.675
QL296_20_H-1	P0_PA14	9	7.47	7.47	29.424	53.473	21.954	46.003
QL296_20_H-1	P0_PA14	10	7.677	7.677	93.808	81.008	86.131	73.331
QL296_20_H-1	P0_PA14	11	7.198	4.522	91.729	107.768	84.531	103.246
QL296_20_H-1	P0_PA14	12	6.558	6.558	35.01	75.425	28.452	68.867
QL296_20_H-1	P0_PA14	13	7.707	3.144	151.464	111.918	143.757	108.774
QL296_20_H-1	P0_PA14	14	4.358	4.358	65.182	72.417	60.824	68.059
QL296_20_H-1	P0_PA14	15	9.449	9.449	54.461	47.162	45.012	37.713
QL296_20_H-1	P0_PA14	16	8.868	8.868	89.259	87.455	80.391	78.587
QL296_20_H-1	P0_PA14	17	7.969	7.969	162.982	75.55	155.013	67.581
QL296_20_H-1	P0_PA14	18	7.72	4.196	157.228	74.347	149.508	70.151
QL296_20_H-1	P0_PA14	19	8.42	8.42	73.923	51.139	65.503	42.719
QL296_20_H-1	P0_PA14	20	8.246	8.246	90.453	56.43	82.207	48.184
QL296_20_H-1	P0_PA14	21	7.896	3.797	100.072	49.504	92.176	45.707
QL296_20_H-1	P0_PA14	22	7.889	4.089	118.26	126.032	110.371	121.943
QL296_20_H-1	P0_PA14	23	8.864	8.864	142.976	117.851	134.112	108.987
QL296_20_H-1	P0_PA14	24	7.11	3.327	149.629	50.1	142.519	46.773

## Sheet: QL296_20_B-1
Experiment Code	Condition	Animal	Background 1	Background 2	Neuron 1 - Mean Brightness	Neuron 2 - Mean Brightness	Neuron 1 - Background Normalized	Neuron 2 - Background Normalized
QL296_20_B-1	P0_OP50	1	3.741	2.034	43.783	38.977	40.042	36.943
QL296_20_B-1	P0_OP50	2	3.548	3.548	60.184	42.298	56.636	38.75
QL296_20_B-1	P0_OP50	3	3.236	1.781	73.41	29.334	70.174	27.553
QL296_20_B-1	P0_OP50	4	3.81	3.81	73.499	38.531	69.689	34.721
QL296_20_B-1	P0_OP50	5	3.861	3.861	48.1	37.527	44.239	33.666
QL296_20_B-1	P0_OP50	6	3.884	3.884	39.165	33.143	35.281	29.259
QL296_20_B-1	P0_OP50	7	3.416	1.878	43.301	30.096	39.885	28.218
QL296_20_B-1	P0_OP50	8	3.7	3.7	25.741	42.844	22.041	39.144
QL296_20_B-1	P0_OP50	9	3.663	2.064	56.456	19.874	52.793	17.81
QL296_20_B-1	P0_OP50	10	3.605	1.933	42.487	21.518	38.882	19.585
QL296_20_B-1	P0_OP50	11	3.533	1.52	43.509	22.559	39.976	21.039
QL296_20_B-1	P0_OP50	12	3.642	1.773	54.328	21.995	50.686	20.222
QL296_20_B-1	P0_OP50	13	3.624	3.624	15.39	35.744	11.766	32.12
QL296_20_B-1	P0_OP50	14	3.556	1.806	52.313	25.495	48.757	23.689
QL296_20_B-1	P0_OP50	15	3.501	3.501	33.362	79.155	29.861	75.654
QL296_20_B-1	P0_OP50	16	3.199	1.662	73.609	25.809	70.41	24.147
QL296_20_B-1	P0_OP50	17	3.499	1.968	56.985	29.123	53.486	27.155
QL296_20_B-1	P0_OP50	18	3.497	1.463	33.839	21.887	30.342	20.424
QL296_20_B-1	P0_OP50	19	3.575	1.938	81.47	26.908	77.895	24.97
QL296_20_B-1	P0_OP50	20	2.411	1.91	64.242	41.459	61.831	39.549
QL296_20_B-1	P0_OP50	21	3.296	1.959	29.888	23.087	26.592	21.128
QL296_20_B-1	P0_OP50	22	3.298	1.835	33.468	18.015	30.17	16.18
QL296_20_B-1	P0_OP50	23	3.359	1.766	44.454	20.148	41.095	18.382
QL296_20_B-1	P0_OP50	24	3.612	3.612	38.57	34.788	34.958	31.176
QL296_20_B-1	P0_OP50	25	3.862	3.862	20.344	58.19	16.482	54.328
QL296_20_B-1	P0_OP50	26	3.776	3.776	46.732	64.44	42.956	60.664
QL296_20_B-1	P0_OP50	27	4.018	4.018	34.879	48.449	30.861	44.431
QL296_20_B-1	P0_OP50	28	3.394	1.499	35.408	19.02	32.014	17.521
QL296_20_B-1	P0_OP50	29	3.63	3.63	24.178	44.088	20.548	40.458
QL296_20_B-1	P0_PA14	1	3.538	3.538	74.321	71.145	70.783	67.607
QL296_20_B-1	P0_PA14	2	2.63	2.63	38.686	75.982	36.056	73.352
QL296_20_B-1	P0_PA14	3	2.806	1.8	91.365	49.113	88.559	47.313
QL296_20_B-1	P0_PA14	4	2.506	1.42	100.254	24.974	97.748	23.554
QL296_20_B-1	P0_PA14	6	2.667	1.763	73.263	81.922	70.596	80.159
QL296_20_B-1	P0_PA14	7	3.14	3.14	40.39	100.634	37.25	97.494
QL296_20_B-1	P0_PA14	8	3.852	3.852	99.037	90.057	95.185	86.205
QL296_20_B-1	P0_PA14	9	3.476	3.476	94.025	78.597	90.549	75.121
QL296_20_B-1	P0_PA14	10	3.486	1.715	81.951	50.055	78.465	48.34
QL296_20_B-1	P0_PA14	11	2.991	2.991	63.242	89.794	60.251	86.803
QL296_20_B-1	P0_PA14	12	2.958	2.958	72.013	51.039	69.055	48.081
QL296_20_B-1	P0_PA14	13	2.985	2.985	61.01	98.184	58.025	95.199
QL296_20_B-1	P0_PA14	14	2.878	2.878	79.269	52.44	76.391	49.562
QL296_20_B-1	P0_PA14	15	2.548	1.6	65.983	58.516	63.435	56.916
QL296_20_B-1	P0_PA14	16	3.048	1.887	97.898	82.87	94.85	80.983
QL296_20_B-1	P0_PA14	17	3.351	3.351	73.838	83.759	70.487	80.408
QL296_20_B-1	P0_PA14	18	2.743	1.516	42.26	29.934	39.517	28.418
QL296_20_B-1	P0_PA14	19	2.621	1.821	59.989	60.813	57.368	58.992
QL296_20_B-1	P0_PA14	20	2.736	2.736	52.399	65.502	49.663	62.766
QL296_20_B-1	P0_PA14	21	3.406	3.406	77.757	60.136	74.351	56.73
QL296_20_B-1	P0_PA14	22	2.784	1.353	80.057	29.033	77.273	27.68
QL296_20_B-1	P0_PA14	23	2.313	1.664	81.468	54.798	79.155	53.134
QL296_20_B-1	P0_PA14	24	2.42	1.229	80.262	31.913	77.842	30.684
QL296_20_B-1	P0_PA14	25	2.958	2.958	84.9	32.148	81.942	29.19
QL296_20_B-1	P0_PA14	26	2.975	2.975	57.192	100.662	54.217	97.687
QL296_20_B-1	P0_PA14	27	3.127	3.127	50.838	80.615	47.711	77.488
QL296_20_B-1	P0_PA14	28	3.061	3.061	92.226	94.904	89.165	91.843
QL296_20_B-1	P0_PA14	29	2.517	1.32	55.888	40.544	53.371	39.224
QL296_20_B-1	P0_PA14	30	3.348	3.348	83.704	46.757	80.356	43.409
QL296_20_B-1	F1_OP50	1	2.996	1.899	42.65	31.808	39.654	29.909
QL296_20_B-1	F1_OP50	2	3.993	3.993	42.776	47.521	38.783	43.528
QL296_20_B-1	F1_OP50	3	3.575	3.575	32.578	15.597	29.003	12.022
QL296_20_B-1	F1_OP50	4	3.153	3.153	22.887	16.569	19.734	13.416
QL296_20_B-1	F1_OP50	5	2.982	1.511	47.52	14.862	44.538	13.351
QL296_20_B-1	F1_OP50	6	3.1	1.422	40.895	29.209	37.795	27.787
QL296_20_B-1	F1_OP50	7	3.266	1.776	42.348	11.978	39.082	10.202
QL296_20_B-1	F1_OP50	8	3.006	2.141	32.368	27.641	29.362	25.5
QL296_20_B-1	F1_OP50	9	3.532	3.532	33.449	19.593	29.917	16.061
QL296_20_B-1	F1_OP50	10	3.654	3.654	12.622	16.097	8.968	12.443
QL296_20_B-1	F1_OP50	11	3.619	3.619	42.957	25.973	39.338	22.354
QL296_20_B-1	F1_OP50	12	3.37	1.694	43.542	12.961	40.172	11.267
QL296_20_B-1	F1_OP50	13	3.017	1.37	39.605	16.493	36.588	15.123
QL296_20_B-1	F1_OP50	14	3.034	1.322	29.619	18.25	26.585	16.928
QL296_20_B-1	F1_OP50	16	3.736	3.736	19.242	12.869	15.506	9.133
QL296_20_B-1	F1_OP50	17	3.164	1.787	39.517	14.803	36.353	13.016
QL296_20_B-1	F1_OP50	18	2.742	1.333	18.919	22.229	16.177	20.896
QL296_20_B-1	F1_OP50	19	3.53	3.53	41.132	29.033	37.602	25.503
QL296_20_B-1	F1_OP50	20	3.052	1.73	39.208	30.545	36.156	28.815
QL296_20_B-1	F1_OP50	22	3	1.592	44.529	16.724	41.529	15.132
QL296_20_B-1	F1_OP50	23	3.027	1.536	38.724	15.619	35.697	14.083
QL296_20_B-1	F1_OP50	24	3.193	1.956	49.455	16.239	46.262	14.283
QL296_20_B-1	F1_OP50	25	3.383	1.82	30.833	13.772	27.45	11.952
QL296_20_B-1	F1_OP50	27	3.355	3.355	38.21	32.817	34.855	29.462
QL296_20_B-1	F1_OP50	28	3.604	3.604	43.269	37.323	39.665	33.719
QL296_20_B-1	F1_OP50	29	2.951	1.771	49.962	33.027	47.011	31.256
QL296_20_B-1	F1_PA14	1	3.583	3.583	107.119	46.998	103.536	43.415
QL296_20_B-1	F1_PA14	2	4.422	4.422	24.534	100.59	20.112	96.168
QL296_20_B-1	F1_PA14	3	3.505	1.975	89.812	56.91	86.307	54.935
QL296_20_B-1	F1_PA14	4	3.319	1.944	100.928	36.232	97.609	34.288
QL296_20_B-1	F1_PA14	9	3.791	2.418	83.521	48.039	79.73	45.621
QL296_20_B-1	F1_PA14	10	4.47	2.701	103.898	66.424	99.428	63.723
QL296_20_B-1	F1_PA14	11	3.821	2.617	62.04	31.615	58.219	28.998
QL296_20_B-1	F1_PA14	12	4.842	2.926	87.855	44.809	83.013	41.883
QL296_20_B-1	F1_PA14	13	3.045	1.772	88.895	34.626	85.85	32.854
QL296_20_B-1	F1_PA14	14	4.178	2.6	77.966	30.648	73.788	28.048
QL296_20_B-1	F1_PA14	15	5.07	3.477	102.142	32.02	97.072	28.543
QL296_20_B-1	F1_PA14	16	4.613	2.975	95.576	25.795	90.963	22.82
QL296_20_B-1	F1_PA14	17	3.536	1.493	74.152	17.822	70.616	16.329
QL296_20_B-1	F1_PA14	18	4.115	2.442	94.205	31.307	90.09	28.865
QL296_20_B-1	F1_PA14	19	4.283	4.283	127.621	33.152	123.338	28.869
QL296_20_B-1	F1_PA14	20	4.58	4.58	74.206	110.28	69.626	105.7
QL296_20_B-1	F1_PA14	21	3.905	3.905	123.784	53.711	119.879	49.806
QL296_20_B-1	F1_PA14	22	3.549	2.512	91.079	64.824	87.53	62.312
QL296_20_B-1	F1_PA14	23	5.187	5.187	55.148	74.173	49.961	68.986
QL296_20_B-1	F1_PA14	24	2.566	1.669	115.473	39.832	112.907	38.163
QL296_20_B-1	F1_PA14	25	4.55	3.057	111.206	44.668	106.656	41.611
QL296_20_B-1	F1_PA14	26	3.434	3.22	171.599	49.718	168.165	46.498
QL296_20_B-1	F1_PA14	27	4.983	3.324	85.156	26.392	80.173	23.068
QL296_20_B-1	F1_PA14	28	4.655	3.282	101.988	43.938	97.333	40.656
QL296_20_B-1	F2_OP50	1	3.378	2.138	56.092	18.682	52.714	16.544
QL296_20_B-1	F2_OP50	2	3.56	2.246	67.327	34.551	63.767	32.305
QL296_20_B-1	F2_OP50	3	3.223	2.661	35.144	30.337	31.921	27.676
QL296_20_B-1	F2_OP50	4	3.307	1.941	53.469	27.065	50.162	25.124
QL296_20_B-1	F2_OP50	5	3.882	2.195	38.413	24.01	34.531	21.815
QL296_20_B-1	F2_OP50	6	4.501	4.501	49.99	83.278	45.489	78.777
QL296_20_B-1	F2_OP50	7	3.811	3.811	45.5	44.14	41.689	40.329
QL296_20_B-1	F2_OP50	8	3.18	1.742	58.133	20.836	54.953	19.094
QL296_20_B-1	F2_OP50	9	3.108	2.012	37.198	33.445	34.09	31.433
QL296_20_B-1	F2_OP50	10	3.051	2.209	48.235	22.14	45.184	19.931
QL296_20_B-1	F2_OP50	11	3.388	1.985	23.609	20.605	20.221	18.62
QL296_20_B-1	F2_OP50	12	3.339	1.954	32.788	30.433	29.449	28.479
QL296_20_B-1	F2_OP50	13	4.035	4.035	34.326	43.339	30.291	39.304
QL296_20_B-1	F2_OP50	14	3.264	2.032	44.708	29.998	41.444	27.966
QL296_20_B-1	F2_OP50	15	3.263	1.728	36.944	18.752	33.681	17.024
QL296_20_B-1	F2_OP50	16	3.761	1.836	39.582	19.148	35.821	17.312
QL296_20_B-1	F2_OP50	17	4.12	3.438	86.311	31.884	82.191	28.446
QL296_20_B-1	F2_OP50	18	3.465	2.304	56.226	20.715	52.761	18.411
QL296_20_B-1	F2_OP50	19	3.444	1.437	34.782	21.987	31.338	20.55
QL296_20_B-1	F2_OP50	20	2.989	1.721	60.301	23.641	57.312	21.92
QL296_20_B-1	F2_OP50	21	2.788	1.674	38.327	25.708	35.539	24.034
QL296_20_B-1	F2_OP50	22	3.3	1.628	37.399	16.925	34.099	15.297
QL296_20_B-1	F2_OP50	23	3.082	2.02	25.999	32.54	22.917	30.52
QL296_20_B-1	F2_OP50	24	3.23	2.122	39.229	31.788	35.999	29.666
QL296_20_B-1	F2_OP50	25	2.955	1.918	50.929	28.703	47.974	26.785
QL296_20_B-1	F2_OP50	26	3.659	3.659	29.489	62.148	25.83	58.489
QL296_20_B-1	F2_OP50	27	3.269	3.269	76.138	61.693	72.869	58.424
QL296_20_B-1	F2_OP50	28	4.177	3.353	54.316	43.994	50.139	40.641
QL296_20_B-1	F2_OP50	29	3.452	2.763	57.616	52.007	54.164	49.244
QL296_20_B-1	F2_OP50	30	3.198	2.074	39.671	38.718	36.473	36.644
QL296_20_B-1	F2_PA14	1	4.168	4.168	44.257	85.133	40.089	80.965
QL296_20_B-1	F2_PA14	2	3.35	3.35	36.087	8.95	32.737	5.6
QL296_20_B-1	F2_PA14	3	3.395	1.546	34.898	15.834	31.503	14.288
QL296_20_B-1	F2_PA14	4	3.826	3.826	51.421	56.282	47.595	52.456
QL296_20_B-1	F2_PA14	5	3.339	1.714	46.554	17.277	43.215	15.563
QL296_20_B-1	F2_PA14	6	3.625	3.625	57.078	52.11	53.453	48.485
QL296_20_B-1	F2_PA14	7	3.545	1.684	16.796	10.963	13.251	9.279
QL296_20_B-1	F2_PA14	8	3.239	2.063	39.644	31.79	36.405	29.727
QL296_20_B-1	F2_PA14	9	3.203	1.594	34.719	15.778	31.516	14.184
QL296_20_B-1	F2_PA14	10	2.996	1.619	72.41	17.249	69.414	15.63
QL296_20_B-1	F2_PA14	11	3.469	3.469	66.267	54.447	62.798	50.978
QL296_20_B-1	F2_PA14	12	4.216	4.216	58.551	24.833	54.335	20.617
QL296_20_B-1	F2_PA14	13	3.916	3.916	53.818	62.831	49.902	58.915
QL296_20_B-1	F2_PA14	14	4.018	2.391	57.926	16.172	53.908	13.781
QL296_20_B-1	F2_PA14	15	4.633	4.633	56.751	53.822	52.118	49.189
QL296_20_B-1	F2_PA14	16	3.37	3.37	52.052	54.103	48.682	50.733
QL296_20_B-1	F2_PA14	17	3.636	1.583	73.333	27.412	69.697	25.829
QL296_20_B-1	F2_PA14	18	3.32	2.526	61.339	31.066	58.019	28.54
QL296_20_B-1	F2_PA14	19	4.592	4.592	42.484	19.464	37.892	14.872
QL296_20_B-1	F2_PA14	20	4.177	4.177	82.046	21.999	77.869	17.822
QL296_20_B-1	F2_PA14	21	3.127	2.028	68.157	49.227	65.03	47.199
QL296_20_B-1	F2_PA14	22	4.091	4.091	21.866	53.866	17.775	49.775
QL296_20_B-1	F2_PA14	23	2.97	1.731	52.069	25.521	49.099	23.79
QL296_20_B-1	F2_PA14	25	3.185	1.647	56.058	17.25	52.873	15.603
QL296_20_B-1	F2_PA14	26	3.599	3.599	23.702	46.796	20.103	43.197
QL296_20_B-1	F2_PA14	28	5.319	2.33	58.221	20.364	52.902	18.034
QL296_20_B-1	F2_PA14	29	3.008	1.814	45.243	35.86	42.235	34.046
QL296_20_B-1	F2_PA14	30	2.982	1.788	53.125	21.334	50.143	19.546

## Sheet: HC1221_20_B-1
Experiment Code	Condition	Animal	Background 1	Background 2	Neuron 1 - Mean Brightness	Neuron 2 - Mean Brightness	Neuron 1 - Background Normalized	Neuron 2 - Background Normalized
HC1221_20_B-1	P0_OP50	1	3.018	3.018	59.26	74.796	56.242	71.778
HC1221_20_B-1	P0_OP50	2	2.281	1.183	73.495	37.779	71.214	36.596
HC1221_20_B-1	P0_OP50	3	2.659	2.659	71.032	28.797	68.373	26.138
HC1221_20_B-1	P0_OP50	4	2.504	2.504	83.905	44.758	81.401	42.254
HC1221_20_B-1	P0_OP50	5	2.783	2.783	86.684	91.357	83.901	88.574
HC1221_20_B-1	P0_OP50	7	2.955	2.955	59.038	57.989	56.083	55.034
HC1221_20_B-1	P0_OP50	9	2.847	2.847	109.767	47.09	106.92	44.243
HC1221_20_B-1	P0_OP50	10	2.497	2.497	76.568	74.909	74.071	72.412
HC1221_20_B-1	P0_OP50	11	2.696	2.696	61.11	81.342	58.414	78.646
HC1221_20_B-1	P0_OP50	12	2.977	2.977	104.413	40.84	101.436	37.863
HC1221_20_B-1	P0_OP50	13	2.674	2.674	73.481	90.594	70.807	87.92
HC1221_20_B-1	P0_OP50	14	2.736	1.734	94.733	45.402	91.997	43.668
HC1221_20_B-1	P0_OP50	15	2.406	1.341	78.246	31.32	75.84	29.979
HC1221_20_B-1	P0_OP50	16	2.306	1.032	57.32	38.271	55.014	37.239
HC1221_20_B-1	P0_OP50	17	2.736	2.736	44.622	88.283	41.886	85.547
HC1221_20_B-1	P0_OP50	18	2.78	2.78	86.646	39.69	83.866	36.91
HC1221_20_B-1	P0_OP50	19	2.127	1.381	115.844	66.916	113.717	65.535
HC1221_20_B-1	P0_OP50	20	2.21	1.635	108.897	68.48	106.687	66.845
HC1221_20_B-1	P0_OP50	21	2.086	1.457	98.133	45.158	96.047	43.701
HC1221_20_B-1	P0_PA14	1	2.901	2.901	107.265	112.975	104.364	110.074
HC1221_20_B-1	P0_PA14	2	2.485	2.485	89.236	113.966	86.751	111.481
HC1221_20_B-1	P0_PA14	3	2.118	1.687	187.956	127.792	185.838	126.105
HC1221_20_B-1	P0_PA14	4	1.872	0.923	105.417	47.517	103.545	46.594
HC1221_20_B-1	P0_PA14	5	2.71	2.71	82.457	84.851	79.747	82.141
HC1221_20_B-1	P0_PA14	6	1.891	1.266	98.342	67.299	96.451	66.033
HC1221_20_B-1	P0_PA14	7	2.369	2.369	89.143	111.564	86.774	109.195
HC1221_20_B-1	P0_PA14	8	2.727	2.727	103.305	81.223	100.578	78.496
HC1221_20_B-1	P0_PA14	9	2.474	2.474	83.77	78.702	81.296	76.228
HC1221_20_B-1	P0_PA14	10	1.962	1.222	117.642	62.693	115.68	61.471
HC1221_20_B-1	P0_PA14	11	2.468	2.468	90.396	81.867	87.928	79.399
HC1221_20_B-1	P0_PA14	12	2.262	1.348	101.011	74.511	98.749	73.163
HC1221_20_B-1	P0_PA14	13	2.8	2.8	70.479	103.807	67.679	101.007
HC1221_20_B-1	P0_PA14	14	2.474	2.474	101.913	90.822	99.439	88.348
HC1221_20_B-1	P0_PA14	15	2.484	2.484	113.264	69.448	110.78	66.964
HC1221_20_B-1	P0_PA14	16	1.743	1.194	134.817	108.156	133.074	106.962
HC1221_20_B-1	P0_PA14	17	2.551	2.551	86.449	95.273	83.898	92.722
HC1221_20_B-1	P0_PA14	18	2.39	2.39	110.637	113.546	108.247	111.156
HC1221_20_B-1	P0_PA14	19	1.853	1.206	100.439	61.351	98.586	60.145
HC1221_20_B-1	P0_PA14	20	2.65	2.65	78.855	114.68	76.205	112.03
HC1221_20_B-1	F1_OP50	1	3.199	2.017	49.731	41.045	46.532	39.028
HC1221_20_B-1	F1_OP50	2	2.713	1.815	44.446	25.858	41.733	24.043
HC1221_20_B-1	F1_OP50	3	2.096	0.908	55.735	41.813	53.639	40.905
HC1221_20_B-1	F1_OP50	4	2.448	1.833	60.68	47.488	58.232	45.655
HC1221_20_B-1	F1_OP50	5	2.92	1.869	39.837	32.02	36.917	30.151
HC1221_20_B-1	F1_OP50	6	2.527	1.349	59.826	24.796	57.299	23.447
HC1221_20_B-1	F1_OP50	7	1.629	1.586	62.827	28.519	61.198	26.933
HC1221_20_B-1	F1_OP50	8	2.303	1.515	48.17	38.488	45.867	36.973
HC1221_20_B-1	F1_OP50	9	2.167	1.35	42.448	40.465	40.281	39.115
HC1221_20_B-1	F1_OP50	10	1.429	1.291	47.265	26.76	45.836	25.469
HC1221_20_B-1	F1_OP50	11	2.403	1.506	53.535	26.277	51.132	24.771
HC1221_20_B-1	F1_OP50	12	2.806	2.806	55.615	28.138	52.809	25.332
HC1221_20_B-1	F1_OP50	13	2.322	1.369	50.591	21.605	48.269	20.236
HC1221_20_B-1	F1_OP50	14	2.135	1.315	38.706	48.48	36.571	47.165
HC1221_20_B-1	F1_OP50	15	2.69	2.69	36.197	51.385	33.507	48.695
HC1221_20_B-1	F1_OP50	16	2.331	1.197	45.38	30.623	43.049	29.426
HC1221_20_B-1	F1_OP50	20	2.812	2.162	74.758	42.053	71.946	39.891
HC1221_20_B-1	F1_OP50	21	2.35	1.908	55.156	44.715	52.806	42.807
HC1221_20_B-1	F1_OP50	22	3.485	2.421	63.764	27.73	60.279	25.309
HC1221_20_B-1	F1_OP50	23	2.667	1.73	68.301	22.267	65.634	20.537
HC1221_20_B-1	F1_OP50	24	1.56	1.071	90.579	34.32	89.019	33.249
HC1221_20_B-1	F1_OP50	25	3.318	2.487	33.277	39.378	29.959	36.891
HC1221_20_B-1	F1_OP50	26	3.246	2.005	70.216	24.758	66.97	22.753
HC1221_20_B-1	F1_OP50	27	3.792	3.792	65.12	28.693	61.328	24.901
HC1221_20_B-1	F1_OP50	28	3.823	3.823	52.678	38.224	48.855	34.401
HC1221_20_B-1	F1_OP50	29	3.611	3.611	63.839	52.097	60.228	48.486
HC1221_20_B-1	F1_OP50	30	2.937	2.296	54.284	52.581	51.347	50.285
HC1221_20_B-1	F1_OP50	31	3.468	1.94	48.256	30.268	44.788	28.328
HC1221_20_B-1	F1_OP50	32	2.165	1.874	70.731	73.034	68.566	71.16
HC1221_20_B-1	F1_PA14	1	1.959	1.557	118.564	50.988	116.605	49.431
HC1221_20_B-1	F1_PA14	2	2.963	2.963	54.683	111.081	51.72	108.118
HC1221_20_B-1	F1_PA14	3	2.735	2.735	125.552	34.918	122.817	32.183
HC1221_20_B-1	F1_PA14	4	2.879	2.879	40.722	96.725	37.843	93.846
HC1221_20_B-1	F1_PA14	5	2.227	1.251	50.699	24.874	48.472	23.623
HC1221_20_B-1	F1_PA14	6	2.87	2.87	70.53	104.681	67.66	101.811
HC1221_20_B-1	F1_PA14	7	2.508	2.508	73.487	62.348	70.979	59.84
HC1221_20_B-1	F1_PA14	8	2.561	2.561	57.172	62.596	54.611	60.035
HC1221_20_B-1	F1_PA14	9	2.669	2.669	64.088	57.385	61.419	54.716
HC1221_20_B-1	F1_PA14	11	2.344	1.792	91.722	82.443	89.378	80.651
HC1221_20_B-1	F1_PA14	12	1.864	1.542	82.059	46.979	80.195	45.437
HC1221_20_B-1	F1_PA14	13	2.378	1.314	85.585	30.621	83.207	29.307
HC1221_20_B-1	F1_PA14	14	1.843	1.843	79.382	27.475	77.539	25.632
HC1221_20_B-1	F1_PA14	15	2.1	1.261	94.143	28.491	92.043	27.23
HC1221_20_B-1	F1_PA14	16	1.662	1.406	79.213	37.879	77.551	36.473
HC1221_20_B-1	F1_PA14	17	2.865	2.865	50.976	92.912	48.111	90.047
HC1221_20_B-1	F1_PA14	18	2.8	2.8	64.13	50.668	61.33	47.868
HC1221_20_B-1	F1_PA14	19	1.74	1.081	64.39	35.762	62.65	34.681
HC1221_20_B-1	F1_PA14	20	1.975	0.959	65.032	27.29	63.057	26.331
HC1221_20_B-1	F1_PA14	21	2.352	1.443	93.019	43.369	90.667	41.926
HC1221_20_B-1	F1_PA14	22	2.004	1.428	106.023	38.968	104.019	37.54
HC1221_20_B-1	F1_PA14	23	2.155	1.349	75.246	40.446	73.091	39.097
HC1221_20_B-1	F1_PA14	24	2.061	1.974	109.29	36.506	107.229	34.532
HC1221_20_B-1	F1_PA14	25	2.382	1.458	77.604	32.978	75.222	31.52
HC1221_20_B-1	F1_PA14	26	2.395	1.613	93.285	38.161	90.89	36.548
HC1221_20_B-1	F1_PA14	27	2.227	1.594	139.976	77.347	137.749	75.753

## Sheet: HC1222_20_B-1
Experiment Code	Condition	Animal	Background 1	Background 2	Neuron 1 - Mean Brightness	Neuron 2 - Mean Brightness	Neuron 1 - Background Normalized	Neuron 2 - Background Normalized
HC1222_20_B-1	P0_OP50	2	2.081	1.686	55.485	16.203	53.404	14.517
HC1222_20_B-1	P0_OP50	3	1.67	1.408	96.733	15.885	95.063	14.477
HC1222_20_B-1	P0_OP50	4	2.857	2.857	55.965	103.93	53.108	101.073
HC1222_20_B-1	P0_OP50	5	2.483	1.488	68.615	27.275	66.132	25.787
HC1222_20_B-1	P0_OP50	6	2.484	1.05	91.944	11.088	89.46	10.038
HC1222_20_B-1	P0_OP50	7	2.665	2.665	71.747	75.65	69.082	72.985
HC1222_20_B-1	P0_OP50	8	2.716	2.716	93.162	26.849	90.446	24.133
HC1222_20_B-1	P0_OP50	9	2.669	2.669	29.692	59.599	27.023	56.93
HC1222_20_B-1	P0_OP50	10	3.066	3.066	94.124	43.043	91.058	39.977
HC1222_20_B-1	P0_OP50	11	2.139	0.863	52.664	16.642	50.525	15.779
HC1222_20_B-1	P0_OP50	12	2.695	0.719	41.839	15.807	39.144	15.088
HC1222_20_B-1	P0_OP50	13	2.012	1.178	61.367	9.42	59.355	8.242
HC1222_20_B-1	P0_OP50	14	2.207	2.207	54.52	22.162	52.313	19.955
HC1222_20_B-1	P0_OP50	15	2.432	1.106	34.285	15.73	31.853	14.624
HC1222_20_B-1	P0_OP50	16	2.584	1.035	65.526	7.687	62.942	6.652
HC1222_20_B-1	P0_PA14	1	2.937	2.036	78.796	72.848	75.859	70.812
HC1222_20_B-1	P0_PA14	2	2.983	2.983	87.234	44.882	84.251	41.899
HC1222_20_B-1	P0_PA14	4	2.953	2.953	57.367	65.853	54.414	62.9
HC1222_20_B-1	P0_PA14	5	2.48	2.48	74.397	90.874	71.917	88.394
HC1222_20_B-1	P0_PA14	6	2.364	2.364	47.022	71.999	44.658	69.635
HC1222_20_B-1	P0_PA14	7	2.661	2.661	98.632	42.603	95.971	39.942
HC1222_20_B-1	P0_PA14	8	2.531	2.531	69.28	55.529	66.749	52.998
HC1222_20_B-1	P0_PA14	9	3.052	3.052	145.963	101.754	142.911	98.702
HC1222_20_B-1	P0_PA14	10	2.726	2.726	105.806	69.152	103.08	66.426
HC1222_20_B-1	P0_PA14	11	2.904	2.904	92.422	80.944	89.518	78.04
HC1222_20_B-1	P0_PA14	12	2.532	2.532	74.848	88.276	72.316	85.744
HC1222_20_B-1	P0_PA14	13	1.814	1.307	138.678	112.219	136.864	110.912
HC1222_20_B-1	P0_PA14	14	2.693	2.693	56.941	85.97	54.248	83.277
HC1222_20_B-1	P0_PA14	15	2.644	1.883	86.84	52.005	84.196	50.122
HC1222_20_B-1	P0_PA14	16	3.83	3.83	99.252	99.515	95.422	95.685
HC1222_20_B-1	P0_PA14	17	2.428	2.013	120.788	89.5	118.36	87.487
HC1222_20_B-1	P0_PA14	18	2.316	1.618	96.897	62.349	94.581	60.731
HC1222_20_B-1	P0_PA14	19	2.233	1.567	109.704	61.47	107.471	59.903
HC1222_20_B-1	P0_PA14	20	2.8	2.8	50.73	68.474	47.93	65.674
HC1222_20_B-1	P0_PA14	21	2.681	2.037	167.51	82.302	164.829	80.265
HC1222_20_B-1	F1_OP50	1	2.334	1.703	81.666	47.759	79.332	46.056
HC1222_20_B-1	F1_OP50	2	2.302	2.289	63.831	56.532	61.529	54.243
HC1222_20_B-1	F1_OP50	3	2.494	1.311	70.959	26.747	68.465	25.436
HC1222_20_B-1	F1_OP50	4	3.135	3.135	61.481	41.748	58.346	38.613
HC1222_20_B-1	F1_OP50	5	2.687	1.731	58.141	19.339	55.454	17.608
HC1222_20_B-1	F1_OP50	6	2.17	1.297	59.845	34.76	57.675	33.463
HC1222_20_B-1	F1_OP50	7	2.659	2.659	55.71	80.636	53.051	77.977
HC1222_20_B-1	F1_OP50	8	2.842	2.842	61.663	29.995	58.821	27.153
HC1222_20_B-1	F1_OP50	9	2.693	2.693	59.131	32.191	56.438	29.498
HC1222_20_B-1	F1_OP50	10	2.978	2.978	24.698	26.553	21.72	23.575
HC1222_20_B-1	F1_OP50	11	2.94	2.94	44.274	16.474	41.334	13.534
HC1222_20_B-1	F1_OP50	12	2.318	1.191	51.324	26.979	49.006	25.788
HC1222_20_B-1	F1_OP50	13	3.017	3.017	52.542	18.487	49.525	15.47
HC1222_20_B-1	F1_OP50	14	2.522	1.436	48.987	23.234	46.465	21.798
HC1222_20_B-1	F1_OP50	15	2.538	1.33	43.015	26.895	40.477	25.565
HC1222_20_B-1	F1_OP50	17	2.953	2.953	64.982	20.098	62.029	17.145
HC1222_20_B-1	F1_OP50	19	3.08	3.08	75.931	39.236	72.851	36.156
HC1222_20_B-1	F1_OP50	21	3.874	2.666	67.155	19.49	63.281	16.824
HC1222_20_B-1	F1_OP50	23	3.046	3.046	73.335	23.719	70.289	20.673
HC1222_20_B-1	F1_OP50	24	2.709	1.646	69.506	25.786	66.797	24.14
HC1222_20_B-1	F1_OP50	25	2.838	1.357	68.659	21.57	65.821	20.213
HC1222_20_B-1	F1_OP50	26	2.905	2.905	57.36	23.483	54.455	20.578
HC1222_20_B-1	F1_OP50	27	4.035	4.035	65.124	17.506	61.089	13.471
HC1222_20_B-1	F1_OP50	28	2.826	2.826	53.048	28.622	50.222	25.796
HC1222_20_B-1	F1_OP50	29	3.636	3.636	50.21	24.985	46.574	21.349
HC1222_20_B-1	F1_OP50	30	2.726	2.726	63.488	52.117	60.762	49.391
HC1222_20_B-1	F1_OP50	31	2.67	1.582	62.587	23.474	59.917	21.892
HC1222_20_B-1	F1_OP50	32	2.86	1.752	81.221	23.532	78.361	21.78
HC1222_20_B-1	F1_OP50	33	2.823	1.984	84.895	31.294	82.072	29.31
HC1222_20_B-1	F1_OP50	34	3.071	3.071	76.483	24.749	73.412	21.678
HC1222_20_B-1	F1_OP50	35	2.276	1.384	50.071	15.584	47.795	14.2
HC1222_20_B-1	F1_OP50	36	4.149	4.149	70.607	22.662	66.458	18.513
HC1222_20_B-1	F1_OP50	37	3.537	3.537	60.974	22.151	57.437	18.614
HC1222_20_B-1	F1_OP50	38	3.446	2.878	79.886	19.319	76.44	16.441
HC1222_20_B-1	F1_PA14	1	2.809	2.809	71.333	73.78	68.524	70.971
HC1222_20_B-1	F1_PA14	2	2.68	1.36	72.199	26.808	69.519	25.448
HC1222_20_B-1	F1_PA14	3	2.299	1.392	91.082	35.746	88.783	34.354
HC1222_20_B-1	F1_PA14	4	2.963	2.963	75.73	76.437	72.767	73.474
HC1222_20_B-1	F1_PA14	5	2.862	1.864	83.375	15.436	80.513	13.572
HC1222_20_B-1	F1_PA14	6	2.312	1.7	60.883	14.002	58.571	12.302
HC1222_20_B-1	F1_PA14	8	2.466	1.924	96.212	37.793	93.746	35.869
HC1222_20_B-1	F1_PA14	9	2.965	2.965	96.65	23.218	93.685	20.253
HC1222_20_B-1	F1_PA14	10	2.41	1.545	69.977	44.781	67.567	43.236
HC1222_20_B-1	F1_PA14	13	2.705	1.36	87.48	45.393	84.775	44.033
HC1222_20_B-1	F1_PA14	14	2.313	1.17	90.33	24.174	88.017	23.004
HC1222_20_B-1	F1_PA14	15	2.661	1.25	61.786	33.721	59.125	32.471
HC1222_20_B-1	F1_PA14	16	2.869	2.869	62.224	80.29	59.355	77.421
HC1222_20_B-1	F1_PA14	18	2.782	1.541	69.761	29.969	66.979	28.428
HC1222_20_B-1	F1_PA14	19	2.78	2.78	59.325	77.794	56.545	75.014
HC1222_20_B-1	F1_PA14	20	2.672	1.313	91.008	40.483	88.336	39.17
HC1222_20_B-1	F1_PA14	21	2.851	1.712	101.76	15.936	98.909	14.224
HC1222_20_B-1	F1_PA14	22	2.752	2.752	65.708	25.702	62.956	22.95
HC1222_20_B-1	F1_PA14	23	3.039	3.039	107.104	40.391	104.065	37.352
HC1222_20_B-1	F1_PA14	24	2.526	1.084	93.885	24.042	91.359	22.958
HC1222_20_B-1	F1_PA14	25	2.247	1.564	69.164	61.354	66.917	59.79
HC1222_20_B-1	F1_PA14	26	2.276	1.755	85.145	45.969	82.869	44.214
HC1222_20_B-1	F1_PA14	27	4.135	2.902	97.784	21.826	93.649	18.924
HC1222_20_B-1	F1_PA14	29	4.204	1.89	95.765	42.817	91.561	40.927

## Sheet: HC1223_20_B-1
Experiment Code	Condition	Animal	Background 1	Background 2	Neuron 1 - Mean Brightness	Neuron 2 - Mean Brightness	Neuron 1 - Background Normalized	Neuron 2 - Background Normalized
HC1223_20_B-1	P0_OP50	1	2.029	1.106	32.383	12.157	30.354	11.051
HC1223_20_B-1	P0_OP50	2	2.181	0.945	34.113	10.432	31.932	9.487
HC1223_20_B-1	P0_OP50	3	2.597	2.597	38.68	10.718	36.083	8.121
HC1223_20_B-1	P0_OP50	4	2.219	2.219	23.633	24.755	21.414	22.536
HC1223_20_B-1	P0_OP50	5	2.62	2.62	41.785	11.848	39.165	9.228
HC1223_20_B-1	P0_OP50	6	2.124	1.121	35.939	12.107	33.815	10.986
HC1223_20_B-1	P0_OP50	7	2.308	2.308	32.842	25.945	30.534	23.637
HC1223_20_B-1	P0_OP50	8	2.457	2.457	33.317	13.685	30.86	11.228
HC1223_20_B-1	P0_OP50	9	2.414	2.414	43.956	31.54	41.542	29.126
HC1223_20_B-1	P0_OP50	10	1.86	0.871	38.144	13.686	36.284	12.815
HC1223_20_B-1	P0_OP50	12	2.426	2.426	29.14	43.84	26.714	41.414
HC1223_20_B-1	P0_OP50	14	2.318	2.318	34.606	9.37	32.288	7.052
HC1223_20_B-1	P0_OP50	15	2.212	1.021	43.684	26.142	41.472	25.121
HC1223_20_B-1	P0_OP50	16	2.284	2.284	21.458	12.332	19.174	10.048
HC1223_20_B-1	P0_OP50	17	2.267	1.114	69.012	20.549	66.745	19.435
HC1223_20_B-1	P0_OP50	18	2.445	2.445	34.491	31.284	32.046	28.839
HC1223_20_B-1	P0_OP50	19	1.789	1.106	34.917	12.776	33.128	11.67
HC1223_20_B-1	P0_OP50	20	2.281	2.281	55.333	23.02	53.052	20.739
HC1223_20_B-1	P0_OP50	21	1.986	1.053	33.413	14.391	31.427	13.338
HC1223_20_B-1	P0_OP50	22	2.418	2.418	46.335	21.752	43.917	19.334
HC1223_20_B-1	P0_OP50	23	2.252	2.252	34.197	40.099	31.945	37.847
HC1223_20_B-1	P0_OP50	24	2.172	2.172	61.543	33.245	59.371	31.073
HC1223_20_B-1	P0_OP50	25	1.745	1.066	47.658	26.631	45.913	25.565
HC1223_20_B-1	P0_OP50	26	2.523	2.523	86.257	28.26	83.734	25.737
HC1223_20_B-1	P0_OP50	27	2.091	0.643	62.324	20.852	60.233	20.209
HC1223_20_B-1	P0_OP50	28	2.386	2.386	68.213	10.256	65.827	7.87
HC1223_20_B-1	P0_OP50	29	2.271	2.271	38.536	15.922	36.265	13.651
HC1223_20_B-1	P0_OP50	30	2.229	2.229	51.281	12.951	49.052	10.722
HC1223_20_B-1	P0_OP50	31	1.734	1.239	49.116	13.985	47.382	12.746
HC1223_20_B-1	P0_OP50	32	2.346	2.346	52.923	32.145	50.577	29.799
HC1223_20_B-1	P0_PA14	1	2.686	2.686	44.058	55.743	41.372	53.057
HC1223_20_B-1	P0_PA14	2	2.628	2.628	37.977	47.667	35.349	45.039
HC1223_20_B-1	P0_PA14	3	2.857	2.857	27.579	37.901	24.722	35.044
HC1223_20_B-1	P0_PA14	4	2.892	2.892	32.919	50.601	30.027	47.709
HC1223_20_B-1	P0_PA14	5	2.143	1.103	26.815	29.171	24.672	28.068
HC1223_20_B-1	P0_PA14	6	2.515	2.515	51.428	38.391	48.913	35.876
HC1223_20_B-1	P0_PA14	7	2.524	2.524	40.692	40.808	38.168	38.284
HC1223_20_B-1	P0_PA14	8	3.351	3.351	49.232	29.283	45.881	25.932
HC1223_20_B-1	P0_PA14	9	2.672	1.32	36.785	15.631	34.113	14.311
HC1223_20_B-1	P0_PA14	10	2.978	2.978	40.022	43.797	37.044	40.819
HC1223_20_B-1	P0_PA14	11	3.305	3.305	25.851	41.405	22.546	38.1
HC1223_20_B-1	P0_PA14	12	2.253	1.06	28.489	18.932	26.236	17.872
HC1223_20_B-1	P0_PA14	13	2.796	2.796	34.639	19.242	31.843	16.446
HC1223_20_B-1	P0_PA14	14	3.759	3.759	80.554	74.619	76.795	70.86
HC1223_20_B-1	P0_PA14	15	2.929	2.929	54.262	31.722	51.333	28.793
HC1223_20_B-1	P0_PA14	16	3.066	3.066	24.425	46.131	21.359	43.065
HC1223_20_B-1	P0_PA14	17	2.881	2.881	41.759	58.154	38.878	55.273
HC1223_20_B-1	P0_PA14	18	2.21	1.429	53.569	31.089	51.359	29.66
HC1223_20_B-1	P0_PA14	20	3.013	3.013	46.569	25.061	43.556	22.048
HC1223_20_B-1	P0_PA14	22	3.481	3.481	24.606	27.141	21.125	23.66
HC1223_20_B-1	P0_PA14	23	3.115	3.115	46.305	44.866	43.19	41.751
HC1223_20_B-1	P0_PA14	24	3.292	3.292	53.089	38.889	49.797	35.597
HC1223_20_B-1	P0_PA14	25	2.548	1.732	42.091	32.59	39.543	30.858
HC1223_20_B-1	P0_PA14	26	2.806	1.539	52.068	33.885	49.262	32.346
HC1223_20_B-1	P0_PA14	27	2.541	1.725	51.198	25.518	48.657	23.793
HC1223_20_B-1	P0_PA14	28	2.222	1.392	51.543	24.64	49.321	23.248
HC1223_20_B-1	P0_PA14	29	2.612	1.277	38.127	24.178	35.515	22.901
HC1223_20_B-1	P0_PA14	30	2.734	1.788	53.626	42.596	50.892	40.808
HC1223_20_B-1	P0_PA14	31	2.475	1.445	45.786	25.981	43.311	24.536
HC1223_20_B-1	P0_PA14	32	3.048	3.048	46.334	48.027	43.286	44.979
HC1223_20_B-1	F1_OP50	1	2.698	2.698	24.347	11.709	21.649	9.011
HC1223_20_B-1	F1_OP50	2	2.315	2.315	31.053	16.37	28.738	14.055
HC1223_20_B-1	F1_OP50	3	1.725	0.812	33.004	8.883	31.279	8.071
HC1223_20_B-1	F1_OP50	5	2.061	0.837	19.133	8.809	17.072	7.972
HC1223_20_B-1	F1_OP50	6	2.389	2.389	15.794	12.997	13.405	10.608
HC1223_20_B-1	F1_OP50	7	2.211	0.777	20.365	11.02	18.154	10.243
HC1223_20_B-1	F1_OP50	8	2.548	2.548	21.13	10.768	18.582	8.22
HC1223_20_B-1	F1_OP50	9	2.268	2.268	35.425	15.89	33.157	13.622
HC1223_20_B-1	F1_OP50	10	2.073	0.893	19.803	8.103	17.73	7.21
HC1223_20_B-1	F1_OP50	11	2.356	2.356	19.167	12.733	16.811	10.377
HC1223_20_B-1	F1_OP50	12	1.676	0.99	27.842	10.801	26.166	9.811
HC1223_20_B-1	F1_OP50	13	2.068	0.831	28.33	13.38	26.262	12.549
HC1223_20_B-1	F1_OP50	14	2.034	0.728	19.053	8.403	17.019	7.675
HC1223_20_B-1	F1_OP50	15	1.874	0.788	21.81	15.789	19.936	15.001
HC1223_20_B-1	F1_OP50	16	2.771	2.771	23.505	14.274	20.734	11.503
HC1223_20_B-1	F1_OP50	17	2.096	1.113	19.485	12.005	17.389	10.892
HC1223_20_B-1	F1_OP50	18	2.223	0.994	21.921	8.678	19.698	7.684
HC1223_20_B-1	F1_OP50	19	2.348	2.348	17.384	15.409	15.036	13.061
HC1223_20_B-1	F1_OP50	20	2.625	2.625	29.533	15.531	26.908	12.906
HC1223_20_B-1	F1_OP50	21	1.87	0.942	26.944	17.921	25.074	16.979
HC1223_20_B-1	F1_OP50	22	2.035	1.089	19.34	7.804	17.305	6.715
HC1223_20_B-1	F1_OP50	23	1.86	1.126	20.935	10.759	19.075	9.633
HC1223_20_B-1	F1_OP50	24	1.892	1.041	34.597	9.951	32.705	8.91
HC1223_20_B-1	F1_OP50	25	2.474	2.474	26.143	21.82	23.669	19.346
HC1223_20_B-1	F1_OP50	26	2.059	2.059	29.768	23.667	27.709	21.608
HC1223_20_B-1	F1_OP50	27	2.129	1.07	23.223	15.225	21.094	14.155
HC1223_20_B-1	F1_OP50	28	2.34	2.34	33.238	23.139	30.898	20.799
HC1223_20_B-1	F1_OP50	29	1.979	1.199	24.442	20.665	22.463	19.466
HC1223_20_B-1	F1_OP50	30	2.267	2.267	39.291	22.704	37.024	20.437
HC1223_20_B-1	F1_OP50	31	2.561	2.561	43.629	11.401	41.068	8.84
HC1223_20_B-1	F1_OP50	32	2.074	1.342	45.567	28.402	43.493	27.06
HC1223_20_B-1	F1_PA14	1	3.661	3.661	49.822	41.072	46.161	37.411
HC1223_20_B-1	F1_PA14	2	2.243	1.196	24.935	17.65	22.692	16.454
HC1223_20_B-1	F1_PA14	3	2.338	1.37	40.952	27.862	38.614	26.492
HC1223_20_B-1	F1_PA14	4	2.333	1.25	29.145	17.75	26.812	16.5
HC1223_20_B-1	F1_PA14	5	2.623	2.623	42.858	44.787	40.235	42.164
HC1223_20_B-1	F1_PA14	6	2.208	1.001	31.23	13.435	29.022	12.434
HC1223_20_B-1	F1_PA14	7	1.935	1.083	28.504	14.077	26.569	12.994
HC1223_20_B-1	F1_PA14	8	2.067	1.119	26.648	20.04	24.581	18.921
HC1223_20_B-1	F1_PA14	9	2.055	1.043	40.517	23.611	38.462	22.568
HC1223_20_B-1	F1_PA14	10	2.226	0.828	31.784	11.181	29.558	10.353
HC1223_20_B-1	F1_PA14	11	3.142	1.882	33.152	13.984	30.01	12.102
HC1223_20_B-1	F1_PA14	12	2.157	0.934	33.079	13.354	30.922	12.42
HC1223_20_B-1	F1_PA14	13	2.332	2.332	24.323	14.452	21.991	12.12
HC1223_20_B-1	F1_PA14	14	2.686	1.422	29.052	17.19	26.366	15.768
HC1223_20_B-1	F1_PA14	15	2.209	1.049	28.854	10.497	26.645	9.448
HC1223_20_B-1	F1_PA14	16	2.086	1.059	38.835	17.779	36.749	16.72
HC1223_20_B-1	F1_PA14	18	2.394	2.394	15.512	32.46	13.118	30.066
HC1223_20_B-1	F1_PA14	19	1.999	1.032	27.124	10.508	25.125	9.476
HC1223_20_B-1	F1_PA14	20	2.123	1.094	26.917	16.818	24.794	15.724
HC1223_20_B-1	F1_PA14	21	2.71	2.71	29.539	37.539	26.829	34.829
HC1223_20_B-1	F1_PA14	22	2.011	1.021	41.541	20.403	39.53	19.382
HC1223_20_B-1	F1_PA14	23	3.536	1.563	46.101	12.87	42.565	11.307
HC1223_20_B-1	F1_PA14	24	2.43	2.43	24.11	16.469	21.68	14.039
HC1223_20_B-1	F1_PA14	25	2.142	1.005	26.658	9.993	24.516	8.988
HC1223_20_B-1	F1_PA14	26	1.948	1.122	36.738	24.077	34.79	22.955
HC1223_20_B-1	F1_PA14	27	2.072	1.008	38.004	16.101	35.932	15.093
HC1223_20_B-1	F1_PA14	28	2.206	1.153	40.722	18.754	38.516	17.601
HC1223_20_B-1	F1_PA14	29	2.596	2.596	15.186	21.604	12.59	19.008
HC1223_20_B-1	F1_PA14	30	2.139	1.015	62.677	24.912	60.538	23.897
HC1223_20_B-1	F1_PA14	31	2.096	1.252	31.073	16.166	28.977	14.914
HC1223_20_B-1	F1_PA14	32	2.267	1.059	35.377	11.291	33.11	10.232

## Sheet: HC1218_20_B-1
Experiment Code	Condition	Animal	Background 1	Background 2	Neuron 1 - Mean Brightness	Neuron 2 - Mean Brightness	Neuron 1 - Background Normalized	Neuron 2 - Background Normalized
HC1218_20_B-1	F1_OP50	1	3.575	2.75	31.296	10.879	27.721	8.129
HC1218_20_B-1	F1_OP50	2	3.076	1.722	38.25	10.056	35.174	8.334
HC1218_20_B-1	F1_OP50	3	3.152	1.54	39.843	10.938	36.691	9.398
HC1218_20_B-1	F1_OP50	4	2.812	1.921	28.962	13.866	26.15	11.945
HC1218_20_B-1	F1_OP50	5	2.847	1.76	25.956	14.307	23.109	12.547
HC1218_20_B-1	F1_OP50	6	3.221	3.221	41.791	13.193	38.57	9.972
HC1218_20_B-1	F1_OP50	7	3.115	1.967	37.286	12.383	34.171	10.416
HC1218_20_B-1	F1_OP50	8	3.239	3.239	27.376	19.673	24.137	16.434
HC1218_20_B-1	F1_OP50	9	2.815	1.37	28.033	8.966	25.218	7.596
HC1218_20_B-1	F1_OP50	10	2.923	2.923	28.098	13.29	25.175	10.367
HC1218_20_B-1	F1_OP50	11	3.024	1.47	26.035	8.883	23.011	7.413
HC1218_20_B-1	F1_OP50	12	2.83	1.335	24.988	7.248	22.158	5.913
HC1218_20_B-1	F1_OP50	14	2.933	1.314	23.566	16.77	20.633	15.456
HC1218_20_B-1	F1_OP50	15	2.472	1.385	30.724	12.366	28.252	10.981
HC1218_20_B-1	F1_OP50	16	3.164	3.164	31.18	16.248	28.016	13.084
HC1218_20_B-1	F1_OP50	17	3.161	3.161	25.509	12.2	22.348	9.039
HC1218_20_B-1	F1_OP50	18	2.874	2.874	34.379	11.866	31.505	8.992
HC1218_20_B-1	F1_OP50	19	3.131	3.131	34.138	17.853	31.007	14.722
HC1218_20_B-1	F1_OP50	20	2.95	1.551	28.747	11.622	25.797	10.071
HC1218_20_B-1	F1_OP50	21	2.917	1.384	25.542	11.189	22.625	9.805
HC1218_20_B-1	F1_OP50	23	3.061	3.061	20.304	7.985	17.243	4.924
HC1218_20_B-1	F1_OP50	24	3.001	3.001	28.028	11.304	25.027	8.303
HC1218_20_B-1	F1_OP50	25	2.927	1.489	24.495	11.251	21.568	9.762
HC1218_20_B-1	F1_OP50	26	2.743	1.626	19.38	7.226	16.637	5.6
HC1218_20_B-1	F1_OP50	27	2.302	1.49	25.894	16.055	23.592	14.565
HC1218_20_B-1	F1_OP50	29	2.724	2.724	34.709	26.107	31.985	23.383
HC1218_20_B-1	F1_OP50	31	2.888	1.748	27.744	9.603	24.856	7.855
HC1218_20_B-1	F1_OP50	32	2.818	2.818	37.516	10.506	34.698	7.688
HC1218_20_B-1	F1_OP50	34	2.67	2.67	26.742	31.887	24.072	29.217
HC1218_20_B-1	F1_OP50	35	3.192	3.192	33.373	10.544	30.181	7.352
HC1218_20_B-1	F1_PA14	1	3.397	3.397	43.467	19.324	40.07	15.927
HC1218_20_B-1	F1_PA14	2	2.749	2.749	40.519	18.65	37.77	15.901
HC1218_20_B-1	F1_PA14	3	2.787	1.685	52.362	27.361	49.575	25.676
HC1218_20_B-1	F1_PA14	4	3.054	3.054	44.203	18.122	41.149	15.068
HC1218_20_B-1	F1_PA14	5	2.615	1.481	40.508	12.691	37.893	11.21
HC1218_20_B-1	F1_PA14	6	2.859	2.859	35.659	48.657	32.8	45.798
HC1218_20_B-1	F1_PA14	7	3.033	3.033	63.148	71.962	60.115	68.929
HC1218_20_B-1	F1_PA14	8	2.427	1.341	49.185	12.873	46.758	11.532
HC1218_20_B-1	F1_PA14	9	2.805	2.805	37.17	23.533	34.365	20.728
HC1218_20_B-1	F1_PA14	10	2.588	2.588	49.611	19.92	47.023	17.332
HC1218_20_B-1	F1_PA14	11	2.732	2.732	39.786	20.647	37.054	17.915
HC1218_20_B-1	F1_PA14	12	2.247	1.461	38.607	17.62	36.36	16.159
HC1218_20_B-1	F1_PA14	13	1.869	1.453	30.645	10.054	28.776	8.601
HC1218_20_B-1	F1_PA14	14	3.047	3.047	63.553	25.69	60.506	22.643
HC1218_20_B-1	F1_PA14	15	2.241	1.396	45.324	13.509	43.083	12.113
HC1218_20_B-1	F1_PA14	16	2.603	2.603	37.614	20.735	35.011	18.132
HC1218_20_B-1	F1_PA14	17	2.499	1.348	28.721	24.295	26.222	22.947
HC1218_20_B-1	F1_PA14	18	2.993	2.993	37.322	19.823	34.329	16.83
HC1218_20_B-1	F1_PA14	19	2.963	2.963	47.796	26.554	44.833	23.591
HC1218_20_B-1	F1_PA14	20	2.935	1.651	46.921	17.781	43.986	16.13
HC1218_20_B-1	F1_PA14	21	2.424	1.329	50.481	19.499	48.057	18.17
HC1218_20_B-1	F1_PA14	22	2.534	1.737	49.475	14.699	46.941	12.962
HC1218_20_B-1	F1_PA14	23	2.649	1.573	37.193	18.056	34.544	16.483
HC1218_20_B-1	F1_PA14	24	2.549	2.549	46.702	35.437	44.153	32.888
HC1218_20_B-1	F1_PA14	25	2.742	2.742	35.971	15.395	33.229	12.653
HC1218_20_B-1	F1_PA14	26	2.456	1.8	36.613	14.632	34.157	12.832
HC1218_20_B-1	F1_PA14	27	2.374	1.522	46.446	26.552	44.072	25.03
HC1218_20_B-1	F1_PA14	28	2.892	2.892	33.479	11.21	30.587	8.318
HC1218_20_B-1	F1_PA14	29	2.757	2.757	39.662	13.043	36.905	10.286
HC1218_20_B-1	F1_PA14	30	2.543	1.397	26.311	17.842	23.768	16.445
HC1218_20_B-1	F1_PA14	31	2.307	1.712	45.955	20.145	43.648	18.433
HC1218_20_B-1	F1_PA14	32	2.592	1.651	32.707	17.918	30.115	16.267
HC1218_20_B-1	F1_PA14	33	2.854	2.854	24.821	38.691	21.967	35.837
HC1218_20_B-1	F1_PA14	34	2.766	1.538	51.739	19.638	48.973	18.1
HC1218_20_B-1	P0_OP50	1	3.031	1.061	40.27	14.275	37.239	13.214
HC1218_20_B-1	P0_OP50	2	2.003	2.003	37.807	14.081	35.804	12.078
HC1218_20_B-1	P0_OP50	3	3.063	1.071	36.547	9.101	33.484	8.03
HC1218_20_B-1	P0_OP50	4	3.192	3.192	49.25	19.935	46.058	16.743
HC1218_20_B-1	P0_OP50	5	2.609	2.609	71.838	22.994	69.229	20.385
HC1218_20_B-1	P0_OP50	6	2.129	1.067	46.871	13.488	44.742	12.421
HC1218_20_B-1	P0_OP50	7	2.609	1.178	34.838	9.1	32.229	7.922
HC1218_20_B-1	P0_OP50	8	2.636	2.636	61.573	10.958	58.937	8.322
HC1218_20_B-1	P0_OP50	9	1.996	1.288	48.583	10.87	46.587	9.582
HC1218_20_B-1	P0_OP50	10	2.419	1.045	47.868	14.884	45.449	13.839
HC1218_20_B-1	P0_OP50	11	2.024	1.508	39.99	11.798	37.966	10.29
HC1218_20_B-1	P0_OP50	12	2.669	2.669	48.812	10.643	46.143	7.974
HC1218_20_B-1	P0_OP50	13	2.723	1.336	52.108	13.8	49.385	12.464
HC1218_20_B-1	P0_OP50	14	2.689	2.689	28.897	23.152	26.208	20.463
HC1218_20_B-1	P0_OP50	16	2.497	1.126	58.246	9.436	55.749	8.31
HC1218_20_B-1	P0_OP50	17	2.154	1.228	39.724	9.587	37.57	8.359
HC1218_20_B-1	P0_OP50	18	2.195	1.405	48.914	13.958	46.719	12.553
HC1218_20_B-1	P0_OP50	19	2.709	2.709	35.814	8.989	33.105	6.28
HC1218_20_B-1	P0_OP50	20	2.082	1.232	50.99	11.496	48.908	10.264
HC1218_20_B-1	P0_OP50	21	1.949	1.604	56.028	10.989	54.079	9.385
HC1218_20_B-1	P0_OP50	22	2.741	2.741	49.954	67.333	47.213	64.592
HC1218_20_B-1	P0_OP50	23	2.963	2.963	49.937	13.235	46.974	10.272
HC1218_20_B-1	P0_OP50	24	2.514	1.182	50.547	19.492	48.033	18.31
HC1218_20_B-1	P0_OP50	25	2.08	1.846	64.063	15.816	61.983	13.97
HC1218_20_B-1	P0_OP50	26	2.685	1.526	54.004	21.243	51.319	19.717
HC1218_20_B-1	P0_OP50	27	2.556	1.288	58.357	14.526	55.801	13.238
HC1218_20_B-1	P0_PA14	1	2.032	1.205	68.998	54.455	66.966	53.25
HC1218_20_B-1	P0_PA14	2	3.304	3.304	72.658	31.857	69.354	28.553
HC1218_20_B-1	P0_PA14	3	2.628	2.628	39.348	74.563	36.72	71.935
HC1218_20_B-1	P0_PA14	4	2.377	2.377	56.031	82.581	53.654	80.204
HC1218_20_B-1	P0_PA14	5	2.477	2.477	64.585	58.743	62.108	56.266
HC1218_20_B-1	P0_PA14	6	2.431	1.409	65.219	34.173	62.788	32.764
HC1218_20_B-1	P0_PA14	7	2.852	2.852	56.836	71.179	53.984	68.327
HC1218_20_B-1	P0_PA14	8	3.184	3.184	77.836	60.945	74.652	57.761
HC1218_20_B-1	P0_PA14	9	2.167	1.385	56.164	49.65	53.997	48.265
HC1218_20_B-1	P0_PA14	10	2.627	2.627	59.251	71.033	56.624	68.406
HC1218_20_B-1	P0_PA14	11	2.528	2.528	54.75	73.397	52.222	70.869
HC1218_20_B-1	P0_PA14	12	2.958	2.958	66.405	59.828	63.447	56.87
HC1218_20_B-1	P0_PA14	13	1.95	1.267	55.117	35.838	53.167	34.571
HC1218_20_B-1	P0_PA14	14	1.966	1.34	100.637	69.899	98.671	68.559
HC1218_20_B-1	P0_PA14	16	2.346	1.239	82.303	29.749	79.957	28.51
HC1218_20_B-1	P0_PA14	17	2.031	1.211	42.963	31.171	40.932	29.96
HC1218_20_B-1	P0_PA14	18	2.138	1.478	62.446	53.763	60.308	52.285
HC1218_20_B-1	P0_PA14	19	2.142	1.087	44.715	42.399	42.573	41.312
HC1218_20_B-1	P0_PA14	20	2.366	1.694	68.542	34.121	66.176	32.427
HC1218_20_B-1	P0_PA14	21	2.646	2.646	53.998	74.008	51.352	71.362
HC1218_20_B-1	P0_PA14	22	2.356	2.356	42.28	51.559	39.924	49.203
HC1218_20_B-1	P0_PA14	23	2.44	2.44	75.335	67.017	72.895	64.577
HC1218_20_B-1	P0_PA14	24	2.583	1.42	62.429	40.836	59.846	39.416
HC1218_20_B-1	P0_PA14	25	2.832	2.832	66.599	91.076	63.767	88.244
HC1218_20_B-1	P0_PA14	26	2.696	2.696	53.515	49.933	50.819	47.237
HC1218_20_B-1	P0_PA14	27	2.602	1.989	70.475	58.563	67.873	56.574
HC1218_20_B-1	P0_PA14	28	2.837	2.837	65.406	70.533	62.569	67.696
HC1218_20_B-1	P0_PA14	29	2.041	1.314	64.029	60.303	61.988	58.989
HC1218_20_B-1	P0_PA14	30	2.871	2.871	68.525	49.725	65.654	46.854
HC1218_20_B-1	P0_PA14	31	2.439	1.631	60.632	54.125	58.193	52.494
HC1218_20_B-1	P0_PA14	32	2.723	2.723	85.04	64.683	82.317	61.96

## Sheet: QL296_25_B-1
Experiment Code	Condition	Animal	Background 1	Background 2	Neuron 1 - Mean Brightness	Neuron 2 - Mean Brightness	Neuron 1 - Background Normalized	Neuron 2 - Background Normalized
QL296_25_B-1	F1_OP50	1	1.955	0.993	33.629	12.328	31.674	11.335
QL296_25_B-1	F1_OP50	2	2.179	2.179	32.543	17.988	30.364	15.809
QL296_25_B-1	F1_OP50	3	1.674	0.824	39.389	11.404	37.715	10.58
QL296_25_B-1	F1_OP50	4	2.208	2.208	37.315	11.727	35.107	9.519
QL296_25_B-1	F1_OP50	5	1.965	0.715	26.812	11.361	24.847	10.646
QL296_25_B-1	F1_OP50	6	2.07	1.039	36.577	20.467	34.507	19.428
QL296_25_B-1	F1_OP50	7	1.779	0.813	25.52	7.827	23.741	7.014
QL296_25_B-1	F1_OP50	8	1.817	0.863	37.904	12.19	36.087	11.327
QL296_25_B-1	F1_OP50	9	2.08	2.08	47.011	17.04	44.931	14.96
QL296_25_B-1	F1_OP50	10	1.741	0.778	14.971	9.768	13.23	8.99
QL296_25_B-1	F1_OP50	11	2.17	2.17	47.668	22.219	45.498	20.049
QL296_25_B-1	F1_OP50	12	2.308	2.308	38.275	35.397	35.967	33.089
QL296_25_B-1	F1_OP50	13	1.926	0.864	25.746	11.346	23.82	10.482
QL296_25_B-1	F1_OP50	14	1.779	0.822	41.401	10.289	39.622	9.467
QL296_25_B-1	F1_OP50	15	2.113	0.862	29.163	11.006	27.05	10.144
QL296_25_B-1	F1_OP50	16	2.259	2.259	35.41	10.66	33.151	8.401
QL296_25_B-1	F1_OP50	17	1.872	0.824	20.689	6.488	18.817	5.664
QL296_25_B-1	F1_OP50	18	1.722	0.934	27.233	18.665	25.511	17.731
QL296_25_B-1	F1_OP50	19	2.235	2.235	32.307	10.751	30.072	8.516
QL296_25_B-1	F1_OP50	20	2.239	2.239	37.721	12.302	35.482	10.063
QL296_25_B-1	F1_OP50	21	2.308	2.308	29.78	14.596	27.472	12.288
QL296_25_B-1	F1_OP50	22	1.891	1.891	23.875	8.345	21.984	6.454
QL296_25_B-1	F1_OP50	23	2.213	1.191	42.314	8.645	40.101	7.454
QL296_25_B-1	F1_OP50	24	1.984	1.984	27.482	8.066	25.498	6.082
QL296_25_B-1	F1_OP50	25	2.029	0.872	34.086	12.934	32.057	12.062
QL296_25_B-1	F1_OP50	26	1.672	0.628	38.328	17.835	36.656	17.207
QL296_25_B-1	F1_OP50	27	1.632	1.172	38.704	8.905	37.072	7.733
QL296_25_B-1	F1_OP50	28	2.194	0.834	34.255	12.271	32.061	11.437
QL296_25_B-1	F1_OP50	29	1.736	1.042	33.377	10.824	31.641	9.782
QL296_25_B-1	F1_OP50	30	1.898	1.064	32.839	10.423	30.941	9.359
QL296_25_B-1	F1_PA14	1	2.144	2.144	63.674	27.902	61.53	25.758
QL296_25_B-1	F1_PA14	2	1.522	1.198	62.11	32.911	60.588	31.713
QL296_25_B-1	F1_PA14	3	2.172	2.172	23.193	34.406	21.021	32.234
QL296_25_B-1	F1_PA14	4	2.106	2.106	66.764	18.915	64.658	16.809
QL296_25_B-1	F1_PA14	5	2.037	2.037	31.923	50.631	29.886	48.594
QL296_25_B-1	F1_PA14	6	1.868	1.868	69.422	34.081	67.554	32.213
QL296_25_B-1	F1_PA14	7	2.121	2.121	57.517	12.871	55.396	10.75
QL296_25_B-1	F1_PA14	8	1.986	1.986	65.116	23.203	63.13	21.217
QL296_25_B-1	F1_PA14	9	1.899	1.899	63.829	17.205	61.93	15.306
QL296_25_B-1	F1_PA14	10	1.698	0.788	61.481	25.046	59.783	24.258
QL296_25_B-1	F1_PA14	11	1.931	0.925	49.507	20.484	47.576	19.559
QL296_25_B-1	F1_PA14	12	1.677	0.753	47.098	18.053	45.421	17.3
QL296_25_B-1	F1_PA14	13	1.66	0.756	50.493	20.398	48.833	19.642
QL296_25_B-1	F1_PA14	14	1.552	0.954	67.761	16.023	66.209	15.069
QL296_25_B-1	F1_PA14	15	1.781	0.954	70.066	23.737	68.285	22.783
QL296_25_B-1	F1_PA14	16	1.67	0.701	57.82	13.507	56.15	12.806
QL296_25_B-1	F1_PA14	17	1.561	0.822	82.271	18.223	80.71	17.401
QL296_25_B-1	F1_PA14	18	2.23	2.23	58.831	17.766	56.601	15.536
QL296_25_B-1	F1_PA14	19	2.066	2.066	45.921	20.49	43.855	18.424
QL296_25_B-1	F1_PA14	20	1.733	0.98	65.352	42.932	63.619	41.952
QL296_25_B-1	F1_PA14	21	1.897	0.936	46.764	19.301	44.867	18.365
QL296_25_B-1	F1_PA14	22	2.09	2.09	69.734	39.64	67.644	37.55
QL296_25_B-1	F1_PA14	23	2.066	2.066	69.078	24.085	67.012	22.019
QL296_25_B-1	F1_PA14	24	1.725	0.822	44.81	20.225	43.085	19.403
QL296_25_B-1	F1_PA14	25	1.262	1.394	59.651	6.492	58.389	5.098
QL296_25_B-1	F1_PA14	26	1.851	1.851	51.183	52.341	49.332	50.49
QL296_25_B-1	F1_PA14	27	1.896	0.739	42.625	15.388	40.729	14.649
QL296_25_B-1	F1_PA14	28	2.019	2.019	76.633	36.495	74.614	34.476
QL296_25_B-1	F1_PA14	29	2.37	2.37	25.929	71.165	23.559	68.795
QL296_25_B-1	F2_OP50	1	1.71	1.154	31.427	11.506	29.717	10.352
QL296_25_B-1	F2_OP50	2	1.886	1.072	29.132	6.259	27.246	5.187
QL296_25_B-1	F2_OP50	3	1.645	0.875	18.764	10.329	17.119	9.454
QL296_25_B-1	F2_OP50	4	1.815	0.885	25.601	7.293	23.786	6.408
QL296_25_B-1	F2_OP50	5	1.925	0.82	43.151	12.092	41.226	11.272
QL296_25_B-1	F2_OP50	6	1.782	0.773	22.398	14.734	20.616	13.961
QL296_25_B-1	F2_OP50	7	1.911	1.321	26	7.069	24.089	5.748
QL296_25_B-1	F2_OP50	8	2.101	2.101	34.924	8.535	32.823	6.434
QL296_25_B-1	F2_OP50	9	1.7	0.607	28.472	8.301	26.772	7.694
QL296_25_B-1	F2_OP50	10	1.698	0.993	18.484	6.767	16.786	5.774
QL296_25_B-1	F2_OP50	11	2.203	2.203	27.088	12.316	24.885	10.113
QL296_25_B-1	F2_OP50	12	1.43	0.932	32.962	10.407	31.532	9.475
QL296_25_B-1	F2_OP50	13	2.164	2.164	21.784	5.97	19.62	3.806
QL296_25_B-1	F2_OP50	14	1.858	0.662	21.908	9.27	20.05	8.608
QL296_25_B-1	F2_OP50	15	1.484	1.081	22.655	7.029	21.171	5.948
QL296_25_B-1	F2_OP50	16	1.532	0.972	21.008	5.122	19.476	4.15
QL296_25_B-1	F2_OP50	17	1.895	1.895	23.989	8.477	22.094	6.582
QL296_25_B-1	F2_OP50	18	1.635	0.944	21.859	5.715	20.224	4.771
QL296_25_B-1	F2_OP50	19	2.354	2.354	24.985	8.695	22.631	6.341
QL296_25_B-1	F2_OP50	20	2.098	2.098	29.565	14.082	27.467	11.984
QL296_25_B-1	F2_OP50	21	1.998	1.256	27.882	13.769	25.884	12.513
QL296_25_B-1	F2_OP50	22	1.737	0.837	38.049	11.675	36.312	10.838
QL296_25_B-1	F2_OP50	24	1.948	1.948	30.658	8.455	28.71	6.507
QL296_25_B-1	F2_OP50	25	2.163	0.732	25.414	8.111	23.251	7.379
QL296_25_B-1	F2_OP50	28	1.959	0.827	33.353	23.536	31.394	22.709
QL296_25_B-1	F2_OP50	29	2.128	2.128	32.091	13.418	29.963	11.29
QL296_25_B-1	F2_OP50	30	2.03	2.03	19.56	10.214	17.53	8.184
QL296_25_B-1	F2_OP50	31	2.135	2.135	17.816	8.822	15.681	6.687
QL296_25_B-1	F2_OP50	32	2.428	2.428	31.731	7.581	29.303	5.153
QL296_25_B-1	F2_OP50	33	2.027	0.898	23.912	9.142	21.885	8.244
QL296_25_B-1	F2_PA14	1	1.71	0.735	24.584	20.17	22.874	19.435
QL296_25_B-1	F2_PA14	2	1.811	0.742	44.269	13.771	42.458	13.029
QL296_25_B-1	F2_PA14	3	1.726	0.603	14.23	10.872	12.504	10.269
QL296_25_B-1	F2_PA14	4	1.704	0.74	42.204	17.34	40.5	16.6
QL296_25_B-1	F2_PA14	5	2.061	2.061	25.754	29.644	23.693	27.583
QL296_25_B-1	F2_PA14	6	1.679	0.553	16.441	6.339	14.762	5.786
QL296_25_B-1	F2_PA14	7	1.565	0.986	36.58	13.404	35.015	12.418
QL296_25_B-1	F2_PA14	8	2.084	2.084	29.627	12.231	27.543	10.147
QL296_25_B-1	F2_PA14	9	1.553	0.736	34.186	7.445	32.633	6.709
QL296_25_B-1	F2_PA14	10	1.71	1.71	38.472	35.468	36.762	33.758
QL296_25_B-1	F2_PA14	11	1.456	1.456	38.165	9.288	36.709	7.832
QL296_25_B-1	F2_PA14	12	2.368	2.368	28.866	13.691	26.498	11.323
QL296_25_B-1	F2_PA14	13	2.02	2.02	30.198	17.629	28.178	15.609
QL296_25_B-1	F2_PA14	14	2.036	0.723	29.549	13.147	27.513	12.424
QL296_25_B-1	F2_PA14	15	2.365	2.365	40.463	14.293	38.098	11.928
QL296_25_B-1	F2_PA14	16	1.952	0.655	34.41	6.989	32.458	6.334
QL296_25_B-1	F2_PA14	17	2.078	0.682	32.992	13.104	30.914	12.422
QL296_25_B-1	F2_PA14	18	1.661	0.835	37.578	5.632	35.917	4.797
QL296_25_B-1	F2_PA14	19	1.848	0.634	31.477	8.916	29.629	8.282
QL296_25_B-1	F2_PA14	20	1.455	0.866	32.735	6.405	31.28	5.539
QL296_25_B-1	F2_PA14	21	1.437	1.017	44.041	7.4	42.604	6.383
QL296_25_B-1	F2_PA14	22	2.365	2.365	33.617	11.224	31.252	8.859
QL296_25_B-1	F2_PA14	23	1.922	0.688	29.524	10.632	27.602	9.944
QL296_25_B-1	F2_PA14	24	1.785	0.992	20.581	8.251	18.796	7.259
QL296_25_B-1	F2_PA14	25	1.574	1.08	31.429	8.707	29.855	7.627
QL296_25_B-1	F2_PA14	26	1.685	1.108	42.057	17.862	40.372	16.754
QL296_25_B-1	F2_PA14	27	1.919	1.919	32.444	7.94	30.525	6.021
QL296_25_B-1	F2_PA14	28	1.817	0.759	36.076	11.931	34.259	11.172
QL296_25_B-1	F2_PA14	30	1.991	1.991	29.206	15.917	27.215	13.926
QL296_25_B-1	F2_PA14	31	1.706	1.706	23.982	19.988	22.276	18.282
QL296_25_B-1	F2_PA14	32	1.959	1.959	40.777	14.515	38.818	12.556
QL296_25_B-1	F2_PA14	33	1.762	0.733	30.045	12.415	28.283	11.682
QL296_25_B-1	P0_OP50	1	1.824	1.824	12.532	36.591	10.708	34.767
QL296_25_B-1	P0_OP50	2	1.382	0.679	42.5	21.563	41.118	20.884
QL296_25_B-1	P0_OP50	3	1.437	0.745	50.168	17.479	48.731	16.734
QL296_25_B-1	P0_OP50	4	1.804	1.804	19.185	55.679	17.381	53.875
QL296_25_B-1	P0_OP50	5	1.365	0.682	38.259	15.736	36.894	15.054
QL296_25_B-1	P0_OP50	6	1.828	1.828	29.491	42.623	27.663	40.795
QL296_25_B-1	P0_OP50	7	1.759	1.759	43.408	7.647	41.649	5.888
QL296_25_B-1	P0_OP50	8	1.825	1.825	37.136	22.516	35.311	20.691
QL296_25_B-1	P0_OP50	9	1.658	1.658	14.512	40.71	12.854	39.052
QL296_25_B-1	P0_OP50	10	1.827	1.827	42.575	13.485	40.748	11.658
QL296_25_B-1	P0_OP50	11	1.541	1.541	57.666	20.459	56.125	18.918
QL296_25_B-1	P0_OP50	12	1.891	1.891	25.379	11.133	23.488	9.242
QL296_25_B-1	P0_OP50	13	1.647	1.647	39.029	20.292	37.382	18.645
QL296_25_B-1	P0_OP50	14	1.731	1.731	34.237	12.87	32.506	11.139
QL296_25_B-1	P0_OP50	15	1.371	0.609	57.133	7.932	55.762	7.323
QL296_25_B-1	P0_OP50	16	1.367	0.617	52.514	14.482	51.147	13.865
QL296_25_B-1	P0_OP50	17	1.699	1.699	44.077	9.825	42.378	8.126
QL296_25_B-1	P0_OP50	18	1.281	0.538	48.37	18.132	47.089	17.594
QL296_25_B-1	P0_OP50	19	1.534	0.599	33.045	15.617	31.511	15.018
QL296_25_B-1	P0_OP50	20	1.384	0.708	32.78	16.011	31.396	15.303
QL296_25_B-1	P0_OP50	21	1.577	1.577	31.688	19.08	30.111	17.503
QL296_25_B-1	P0_OP50	22	1.183	0.756	37.506	6.547	36.323	5.791
QL296_25_B-1	P0_OP50	23	1.749	1.749	40.292	13.967	38.543	12.218
QL296_25_B-1	P0_OP50	24	1.891	1.891	53.99	14.535	52.099	12.644
QL296_25_B-1	P0_OP50	25	1.766	1.766	38.719	10.176	36.953	8.41
QL296_25_B-1	P0_OP50	26	1.632	1.632	35.066	10.685	33.434	9.053
QL296_25_B-1	P0_OP50	27	1.803	1.803	72.409	21.165	70.606	19.362
QL296_25_B-1	P0_PA14	1	1.637	0.932	57.227	35.305	55.59	34.373
QL296_25_B-1	P0_PA14	2	1.298	0.671	32.614	14.727	31.316	14.056
QL296_25_B-1	P0_PA14	3	2.141	2.141	54.472	30.197	52.331	28.056
QL296_25_B-1	P0_PA14	4	2.085	2.085	68.544	48.417	66.459	46.332
QL296_25_B-1	P0_PA14	5	1.728	1.18	55.417	20.758	53.689	19.578
QL296_25_B-1	P0_PA14	6	1.309	0.792	52.017	22.339	50.708	21.547
QL296_25_B-1	P0_PA14	7	1.995	0.995	45.964	28.779	43.969	27.784
QL296_25_B-1	P0_PA14	8	1.736	1.736	52.785	30.045	51.049	28.309
QL296_25_B-1	P0_PA14	9	1.199	0.794	40.276	20.044	39.077	19.25
QL296_25_B-1	P0_PA14	10	1.964	1.964	77.262	38.169	75.298	36.205
QL296_25_B-1	P0_PA14	11	1.132	1.132	40.423	12.627	39.291	11.495
QL296_25_B-1	P0_PA14	12	2.055	0.674	51.082	17.146	49.027	16.472
QL296_25_B-1	P0_PA14	13	1.224	0.813	67.623	21.867	66.399	21.054
QL296_25_B-1	P0_PA14	14	1.717	1.717	29.025	39.27	27.308	37.553
QL296_25_B-1	P0_PA14	15	1.026	0.876	51.265	15.645	50.239	14.769
QL296_25_B-1	P0_PA14	16	1.658	1.027	46.624	16.104	44.966	15.077
QL296_25_B-1	P0_PA14	17	1.394	0.819	59.784	17.602	58.39	16.783
QL296_25_B-1	P0_PA14	18	2.043	2.043	50.74	56.12	48.697	54.077
QL296_25_B-1	P0_PA14	19	1.861	1.861	17.205	44.226	15.344	42.365
QL296_25_B-1	P0_PA14	20	1.466	0.835	40.343	17.29	38.877	16.455
QL296_25_B-1	P0_PA14	21	2.344	2.344	40.542	26.034	38.198	23.69
QL296_25_B-1	P0_PA14	22	1.648	1.003	54.551	35.873	52.903	34.87
QL296_25_B-1	P0_PA14	23	2.248	2.248	32.287	32.836	30.039	30.588
QL296_25_B-1	P0_PA14	24	2.122	2.122	44.878	47.546	42.756	45.424
QL296_25_B-1	P0_PA14	25	1.324	0.528	47.8	23.546	46.476	23.018
QL296_25_B-1	P0_PA14	26	1.204	0.94	48.748	56.497	47.544	55.557
QL296_25_B-1	P0_PA14	27	1.871	1.871	52.36	64.278	50.489	62.407
QL296_25_B-1	P0_PA14	28	1.903	1.627	92.336	34.348	90.433	32.721
QL296_25_B-1	P0_PA14	29	2.017	2.017	56.438	45.527	54.421	43.51

## Sheet: QL296_25_B-2
Experiment Code	Condition	Animal	Background 1	Background 2	Neuron 1 - Mean Brightness	Neuron 2 - Mean Brightness	Neuron 1 - Background Normalized	Neuron 2 - Background Normalized
QL296_25_B-2	F1_OP50	1	1.73	0.999	15.01	5.333	13.28	4.334
QL296_25_B-2	F1_OP50	2	1.995	0.99	26.103	8.239	24.108	7.249
QL296_25_B-2	F1_OP50	3	2.259	2.259	26.077	8.852	23.818	6.593
QL296_25_B-2	F1_OP50	4	1.745	0.916	19.984	7.397	18.239	6.481
QL296_25_B-2	F1_OP50	5	2.061	2.061	17.23	4.513	15.169	2.452
QL296_25_B-2	F1_OP50	6	2.176	2.176	16.125	5.017	13.949	2.841
QL296_25_B-2	F1_OP50	7	2.113	2.113	21.058	18.591	18.945	16.478
QL296_25_B-2	F1_OP50	8	1.932	1.932	20.104	9.006	18.172	7.074
QL296_25_B-2	F1_OP50	9	1.735	0.703	15.44	5.11	13.705	4.407
QL296_25_B-2	F1_OP50	10	1.673	0.963	29.033	9.526	27.36	8.563
QL296_25_B-2	F1_OP50	11	1.867	1.017	27.987	7.271	26.12	6.254
QL296_25_B-2	F1_OP50	12	1.514	1.1	26.559	5.983	25.045	4.883
QL296_25_B-2	F1_OP50	13	2.184	2.184	23.886	6.873	21.702	4.689
QL296_25_B-2	F1_OP50	14	1.632	0.936	16.255	7.945	14.623	7.009
QL296_25_B-2	F1_OP50	15	1.893	1.893	18.18	5.788	16.287	3.895
QL296_25_B-2	F1_OP50	16	1.563	0.981	15.194	14.424	13.631	13.443
QL296_25_B-2	F1_OP50	17	1.699	0.849	21.028	4.413	19.329	3.564
QL296_25_B-2	F1_OP50	18	1.709	0.853	18.337	5.319	16.628	4.466
QL296_25_B-2	F1_OP50	19	2.238	2.238	18.309	6.093	16.071	3.855
QL296_25_B-2	F1_OP50	20	1.676	0.548	18.539	5.502	16.863	4.954
QL296_25_B-2	F1_OP50	21	2.031	2.031	15.444	4.306	13.413	2.275
QL296_25_B-2	F1_OP50	22	2.171	2.171	26.291	10.456	24.12	8.285
QL296_25_B-2	F1_OP50	23	1.685	0.935	30.753	13.332	29.068	12.397
QL296_25_B-2	F1_OP50	24	1.745	1.013	21.34	7.128	19.595	6.115
QL296_25_B-2	F1_OP50	25	2.182	2.182	22.075	10.603	19.893	8.421
QL296_25_B-2	F1_OP50	26	1.835	0.88	17.205	6.763	15.37	5.883
QL296_25_B-2	F1_OP50	27	1.636	0.937	28.537	13.905	26.901	12.968
QL296_25_B-2	F1_OP50	28	2.245	2.245	40.364	12.865	38.119	10.62
QL296_25_B-2	F1_OP50	29	1.739	1.164	29.605	8.392	27.866	7.228
QL296_25_B-2	F1_OP50	30	1.923	1.102	37.24	13.12	35.317	12.018
QL296_25_B-2	F1_OP50	31	1.67	0.925	24.091	10.155	22.421	9.23
QL296_25_B-2	F1_OP50	32	1.943	0.992	22.286	10.187	20.343	9.195
QL296_25_B-2	F1_PA14	1	1.806	0.767	16.735	11.135	14.929	10.368
QL296_25_B-2	F1_PA14	4	1.798	1.263	23.973	13.077	22.175	11.814
QL296_25_B-2	F1_PA14	6	2.198	0.798	23.669	11.023	21.471	10.225
QL296_25_B-2	F1_PA14	7	2.15	2.15	29.416	10.257	27.266	8.107
QL296_25_B-2	F1_PA14	8	1.994	1.119	41.918	11.593	39.924	10.474
QL296_25_B-2	F1_PA14	9	2.252	2.252	26.655	11.339	24.403	9.087
QL296_25_B-2	F1_PA14	10	1.642	0.952	20.707	11.287	19.065	10.335
QL296_25_B-2	F1_PA14	11	2.277	2.277	36.084	9.34	33.807	7.063
QL296_25_B-2	F1_PA14	13	2.069	1.193	29.558	5.991	27.489	4.798
QL296_25_B-2	F1_PA14	14	1.469	1.005	33.231	5.572	31.762	4.567
QL296_25_B-2	F1_PA14	15	2.571	2.571	38.543	6.497	35.972	3.926
QL296_25_B-2	F1_PA14	16	1.748	0.729	24.208	9.811	22.46	9.082
QL296_25_B-2	F1_PA14	17	1.991	1.991	26.972	12.265	24.981	10.274
QL296_25_B-2	F1_PA14	18	2.449	2.449	30.475	6.172	28.026	3.723
QL296_25_B-2	F1_PA14	20	2.413	2.413	25.558	9.76	23.145	7.347
QL296_25_B-2	F1_PA14	22	2.452	2.452	29.009	13.306	26.557	10.854
QL296_25_B-2	F1_PA14	23	1.73	1.255	41.59	15.573	39.86	14.318
QL296_25_B-2	F1_PA14	24	2.106	2.106	31.939	11.801	29.833	9.695
QL296_25_B-2	F1_PA14	25	1.739	1.004	33.577	18.164	31.838	17.16
QL296_25_B-2	F1_PA14	26	1.63	1.019	34.686	10.764	33.056	9.745
QL296_25_B-2	F1_PA14	27	1.974	0.848	25.996	16.338	24.022	15.49
QL296_25_B-2	F1_PA14	28	2.177	2.177	35.438	35.005	33.261	32.828
QL296_25_B-2	F1_PA14	29	1.993	1.993	52.233	24.24	50.24	22.247
QL296_25_B-2	F1_PA14	30	1.46	1.146	29.257	6.888	27.797	5.742
QL296_25_B-2	F1_PA14	31	2.016	2.016	33.122	11.385	31.106	9.369
QL296_25_B-2	F1_PA14	32	2.491	2.491	29.287	12.436	26.796	9.945
QL296_25_B-2	F2_OP50	1	2.245	2.245	26.759	15.09	24.514	12.845
QL296_25_B-2	F2_OP50	2	2.243	2.243	20.243	7.913	18	5.67
QL296_25_B-2	F2_OP50	3	2.22	2.22	34.821	7.481	32.601	5.261
QL296_25_B-2	F2_OP50	4	2.008	2.008	34.214	8.34	32.206	6.332
QL296_25_B-2	F2_OP50	5	1.814	0.73	20.465	12.21	18.651	11.48
QL296_25_B-2	F2_OP50	6	2.22	2.22	25.678	7.57	23.458	5.35
QL296_25_B-2	F2_OP50	7	1.84	1.043	34.702	5.477	32.862	4.434
QL296_25_B-2	F2_OP50	8	1.637	0.649	21.8	6.6	20.163	5.951
QL296_25_B-2	F2_OP50	9	1.709	0.883	13.317	8.27	11.608	7.387
QL296_25_B-2	F2_OP50	10	1.37	1.03	19.787	7.082	18.417	6.052
QL296_25_B-2	F2_OP50	11	1.705	0.879	19.435	6.971	17.73	6.092
QL296_25_B-2	F2_OP50	12	1.719	0.628	28.454	6.888	26.735	6.26
QL296_25_B-2	F2_OP50	13	1.422	1.422	28.924	7.915	27.502	6.493
QL296_25_B-2	F2_OP50	14	1.827	1.02	25.382	6.1	23.555	5.08
QL296_25_B-2	F2_OP50	15	1.739	0.747	24.469	5.442	22.73	4.695
QL296_25_B-2	F2_OP50	16	1.415	1.019	35.314	8.303	33.899	7.284
QL296_25_B-2	F2_OP50	17	2.146	2.146	17.782	6.682	15.636	4.536
QL296_25_B-2	F2_OP50	18	1.911	1.911	26.654	5.062	24.743	3.151
QL296_25_B-2	F2_OP50	19	1.595	0.81	20.306	5.331	18.711	4.521
QL296_25_B-2	F2_OP50	20	1.965	1.965	25.968	9.025	24.003	7.06
QL296_25_B-2	F2_OP50	21	2.132	2.132	19.29	7.927	17.158	5.795
QL296_25_B-2	F2_OP50	22	1.635	0.897	22.398	7.177	20.763	6.28
QL296_25_B-2	F2_OP50	23	2.026	2.026	19.574	11.705	17.548	9.679
QL296_25_B-2	F2_OP50	24	1.924	1.924	18.276	9.472	16.352	7.548
QL296_25_B-2	F2_OP50	25	2.043	2.043	29.248	12.16	27.205	10.117
QL296_25_B-2	F2_OP50	26	2.204	1.228	24.873	6.693	22.669	5.465
QL296_25_B-2	F2_OP50	27	1.624	1.045	24.64	8.071	23.016	7.026
QL296_25_B-2	F2_OP50	28	1.937	1.021	30.228	7.646	28.291	6.625
QL296_25_B-2	F2_OP50	29	1.752	0.854	25.165	8.025	23.413	7.171
QL296_25_B-2	F2_OP50	30	1.818	0.919	31.546	12.604	29.728	11.685
QL296_25_B-2	F2_OP50	31	1.906	1.049	20.364	8.266	18.458	7.217
QL296_25_B-2	F2_OP50	32	1.631	1.076	26.746	6.881	25.115	5.805
QL296_25_B-2	F2_OP50	33	2.101	2.101	23.641	13.918	21.54	11.817
QL296_25_B-2	F2_OP50	34	1.672	0.903	25.992	11.533	24.32	10.63
QL296_25_B-2	F2_OP50	35	1.451	0.931	23.809	6.023	22.358	5.092
QL296_25_B-2	F2_OP50	36	1.776	0.794	19.763	13.474	17.987	12.68
QL296_25_B-2	F2_OP50	37	2.284	2.284	14.441	8.223	12.157	5.939
QL296_25_B-2	F2_OP50	38	1.949	0.993	25.079	18.12	23.13	17.127
QL296_25_B-2	F2_OP50	39	1.789	0.742	25.948	14.152	24.159	13.41
QL296_25_B-2	F2_OP50	40	1.851	0.829	10.96	5.799	9.109	4.97
QL296_25_B-2	F2_OP50	41	2	2	26.24	8.583	24.24	6.583
QL296_25_B-2	F2_OP50	42	1.844	0.844	16.056	8.816	14.212	7.972
QL296_25_B-2	F2_OP50	43	1.69	0.945	25.24	8.034	23.55	7.089
QL296_25_B-2	F2_OP50	44	1.694	0.914	23.037	7.425	21.343	6.511
QL296_25_B-2	F2_OP50	45	1.674	1.353	17.846	6.541	16.172	5.188
QL296_25_B-2	F2_OP50	46	1.978	1.978	19.201	11.797	17.223	9.819
QL296_25_B-2	F2_OP50	47	1.838	0.921	30.952	15.626	29.114	14.705
QL296_25_B-2	F2_OP50	48	2.155	2.155	18.089	11.475	15.934	9.32
QL296_25_B-2	F2_OP50	49	1.974	1.974	16.478	6.657	14.504	4.683
QL296_25_B-2	F2_OP50	50	1.871	0.758	22.096	9.74	20.225	8.982
QL296_25_B-2	F2_OP50	51	1.652	0.814	30.033	10.454	28.381	9.64
QL296_25_B-2	F2_OP50	52	2.281	2.281	28.838	13.287	26.557	11.006
QL296_25_B-2	F2_OP50	53	2.146	2.146	27.249	11.64	25.103	9.494
QL296_25_B-2	F2_OP50	54	2.034	2.034	24.919	9.607	22.885	7.573
QL296_25_B-2	F2_PA14	3	1.642	0.645	12.073	4.475	10.431	3.83
QL296_25_B-2	F2_PA14	5	2.26	2.26	15.135	4.916	12.875	2.656
QL296_25_B-2	F2_PA14	7	2.456	2.456	13.384	6.216	10.928	3.76
QL296_25_B-2	F2_PA14	8	1.939	0.64	16.281	4.651	14.342	4.011
QL296_25_B-2	F2_PA14	9	1.965	1.965	14.405	7.233	12.44	5.268
QL296_25_B-2	F2_PA14	11	1.972	1.972	17.439	7.322	15.467	5.35
QL296_25_B-2	F2_PA14	12	1.876	0.637	14.96	7.934	13.084	7.297
QL296_25_B-2	F2_PA14	14	1.858	0.928	21.38	6.401	19.522	5.473
QL296_25_B-2	F2_PA14	15	1.555	0.697	19.039	5.95	17.484	5.253
QL296_25_B-2	F2_PA14	17	1.962	0.838	20.391	5.171	18.429	4.333
QL296_25_B-2	F2_PA14	18	1.724	0.841	20.122	6.286	18.398	5.445
QL296_25_B-2	F2_PA14	20	2.108	2.108	21.359	9.182	19.251	7.074
QL296_25_B-2	F2_PA14	21	1.816	1.816	22.803	7.667	20.987	5.851
QL296_25_B-2	F2_PA14	22	1.537	0.962	26.617	5.969	25.08	5.007
QL296_25_B-2	F2_PA14	23	2.258	2.258	21.213	7.188	18.955	4.93
QL296_25_B-2	F2_PA14	24	1.629	0.891	23.557	4.948	21.928	4.057
QL296_25_B-2	F2_PA14	26	1.921	1.921	15.709	6.186	13.788	4.265
QL296_25_B-2	F2_PA14	27	1.678	0.645	25.626	12.663	23.948	12.018
QL296_25_B-2	F2_PA14	28	1.505	0.902	22.833	6.026	21.328	5.124
QL296_25_B-2	F2_PA14	29	1.702	0.999	26.386	11.633	24.684	10.634
QL296_25_B-2	F2_PA14	30	2.104	2.104	35.516	11.023	33.412	8.919
QL296_25_B-2	F2_PA14	31	2.31	2.31	31.935	10.033	29.625	7.723
QL296_25_B-2	F2_PA14	32	1.676	0.895	18.724	8.146	17.048	7.251
QL296_25_B-2	F2_PA14	33	2.071	2.071	18.875	7.566	16.804	5.495
QL296_25_B-2	F2_PA14	34	2.112	2.112	41.398	8.449	39.286	6.337
QL296_25_B-2	F2_PA14	35	1.393	0.635	16.289	4.61	14.896	3.975
QL296_25_B-2	F2_PA14	36	1.985	1.985	16.375	8.238	14.39	6.253
QL296_25_B-2	F2_PA14	37	1.52	0.772	15.821	6.737	14.301	5.965
QL296_25_B-2	F2_PA14	38	1.754	0.864	17.105	5.082	15.351	4.218
QL296_25_B-2	F2_PA14	39	1.656	0.803	18.049	8.305	16.393	7.502
QL296_25_B-2	F2_PA14	40	1.821	0.785	19.616	7.973	17.795	7.188
QL296_25_B-2	F2_PA14	41	2.037	2.037	22.51	5.674	20.473	3.637
QL296_25_B-2	F2_PA14	42	1.796	0.8	20.917	6.438	19.121	5.638
QL296_25_B-2	F2_PA14	43	1.651	0.873	24.803	9.361	23.152	8.488
QL296_25_B-2	F2_PA14	44	1.887	0.778	31.478	7.565	29.591	6.787
QL296_25_B-2	F2_PA14	45	2.041	2.041	26.408	5.668	24.367	3.627
QL296_25_B-2	F2_PA14	46	2.282	2.282	20.815	7.587	18.533	5.305
QL296_25_B-2	F2_PA14	47	2.319	2.319	18.147	5.307	15.828	2.988
QL296_25_B-2	F2_PA14	48	1.395	0.916	29.959	11.034	28.564	10.118
QL296_25_B-2	F2_PA14	49	1.729	0.682	13.996	7.748	12.267	7.066
QL296_25_B-2	F2_PA14	50	1.734	0.732	16.512	12.424	14.778	11.692
QL296_25_B-2	F2_PA14	51	1.193	0.755	25.04	7.162	23.847	6.407
QL296_25_B-2	F2_PA14	52	2.185	2.185	23.458	7.944	21.273	5.759
QL296_25_B-2	F2_PA14	53	2.006	2.006	26.812	7.712	24.806	5.706
QL296_25_B-2	F2_PA14	55	1.846	1.046	19.013	5.328	17.167	4.282
QL296_25_B-2	F2_PA14	56	1.833	1.071	14.132	5.301	12.299	4.23
QL296_25_B-2	F2_PA14	57	1.957	0.884	20.021	6.489	18.064	5.605
QL296_25_B-2	F2_PA14	58	1.588	0.956	14.465	6.014	12.877	5.058
QL296_25_B-2	F2_PA14	59	1.742	0.895	19.464	7.244	17.722	6.349
QL296_25_B-2	F2_PA14	60	1.692	1.009	25.074	6.099	23.382	5.09
QL296_25_B-2	P0_OP50	1	1.8	1.8	27.339	12.125	25.539	10.325
QL296_25_B-2	P0_OP50	2	1.254	1.254	34.592	8.882	33.338	7.628
QL296_25_B-2	P0_OP50	3	1.462	0.963	38.378	8.618	36.916	7.655
QL296_25_B-2	P0_OP50	4	1.89	1.89	27.766	8.271	25.876	6.381
QL296_25_B-2	P0_OP50	6	1.836	1.836	34.172	8.412	32.336	6.576
QL296_25_B-2	P0_OP50	7	2.312	2.312	35.288	12.154	32.976	9.842
QL296_25_B-2	P0_OP50	8	1.661	0.504	24.26	7.194	22.599	6.69
QL296_25_B-2	P0_OP50	9	2.252	2.252	32.601	24.139	30.349	21.887
QL296_25_B-2	P0_OP50	10	1.527	0.875	36.844	8.319	35.317	7.444
QL296_25_B-2	P0_OP50	11	1.828	1.828	41.216	16.423	39.388	14.595
QL296_25_B-2	P0_OP50	12	1.822	1.822	18.628	10.841	16.806	9.019
QL296_25_B-2	P0_OP50	13	2.298	2.298	30.137	7.434	27.839	5.136
QL296_25_B-2	P0_OP50	14	1.929	1.929	48.876	9.698	46.947	7.769
QL296_25_B-2	P0_OP50	16	2.339	2.339	10.037	4.262	7.698	1.923
QL296_25_B-2	P0_OP50	17	1.138	1.2	35.309	5.59	34.171	4.39
QL296_25_B-2	P0_OP50	18	1.728	1.728	32.112	8.627	30.384	6.899
QL296_25_B-2	P0_OP50	19	2.231	2.231	18.037	17.327	15.806	15.096
QL296_25_B-2	P0_OP50	20	1.296	0.908	33.483	7.143	32.187	6.235
QL296_25_B-2	P0_OP50	21	1.686	0.556	11.185	5.833	9.499	5.277
QL296_25_B-2	P0_OP50	22	1.126	0.858	22.584	7.239	21.458	6.381
QL296_25_B-2	P0_OP50	23	1.854	0.715	27.991	8.075	26.137	7.36
QL296_25_B-2	P0_OP50	24	1.829	1.829	66.94	44.809	65.111	42.98
QL296_25_B-2	P0_OP50	25	1.469	0.939	21.813	8.943	20.344	8.004
QL296_25_B-2	P0_OP50	26	2.231	2.231	25.581	8.252	23.35	6.021
QL296_25_B-2	P0_OP50	27	1.946	1.946	34.225	16.572	32.279	14.626
QL296_25_B-2	P0_OP50	28	1.983	1.983	32.18	6.914	30.197	4.931
QL296_25_B-2	P0_OP50	29	1.993	1.993	25.809	7.608	23.816	5.615
QL296_25_B-2	P0_OP50	30	1.76	0.515	19.602	5.382	17.842	4.867
QL296_25_B-2	P0_OP50	31	1.888	1.888	23.949	21.64	22.061	19.752
QL296_25_B-2	P0_OP50	32	1.632	1.632	26.402	10.377	24.77	8.745
QL296_25_B-2	P0_PA14	1	1.68	1.68	43.193	48.568	41.513	46.888
QL296_25_B-2	P0_PA14	2	2.105	2.105	32.528	36.821	30.423	34.716
QL296_25_B-2	P0_PA14	3	1.751	1.028	32.471	16.662	30.72	15.634
QL296_25_B-2	P0_PA14	4	2.608	2.608	24.612	25.931	22.004	23.323
QL296_25_B-2	P0_PA14	5	2.52	2.52	19.216	25.717	16.696	23.197
QL296_25_B-2	P0_PA14	6	2.491	2.491	43.753	43.461	41.262	40.97
QL296_25_B-2	P0_PA14	7	2.583	2.583	34.104	24.782	31.521	22.199
QL296_25_B-2	P0_PA14	8	2.478	2.478	15.727	13.419	13.249	10.941
QL296_25_B-2	P0_PA14	9	1.685	1.191	41.274	32.437	39.589	31.246
QL296_25_B-2	P0_PA14	10	2.316	2.316	26.467	18.716	24.151	16.4
QL296_25_B-2	P0_PA14	11	2.258	2.258	49.645	36.912	47.387	34.654
QL296_25_B-2	P0_PA14	12	2.711	2.711	59.9	60.883	57.189	58.172
QL296_25_B-2	P0_PA14	13	1.986	1.986	32.383	26.592	30.397	24.606
QL296_25_B-2	P0_PA14	14	2.395	2.395	28.256	37.509	25.861	35.114
QL296_25_B-2	P0_PA14	15	1.888	1.271	25.599	8.502	23.711	7.231
QL296_25_B-2	P0_PA14	16	2.236	2.236	40.652	37.762	38.416	35.526
QL296_25_B-2	P0_PA14	17	2.452	2.452	37.761	36.772	35.309	34.32
QL296_25_B-2	P0_PA14	18	2.389	2.389	39.511	15.025	37.122	12.636
QL296_25_B-2	P0_PA14	19	2.126	2.126	26.945	44.702	24.819	42.576
QL296_25_B-2	P0_PA14	20	2.305	2.305	43.006	27.66	40.701	25.355
QL296_25_B-2	P0_PA14	21	1.689	0.977	38.962	17.059	37.273	16.082
QL296_25_B-2	P0_PA14	22	2.25	2.25	24.364	37.245	22.114	34.995
QL296_25_B-2	P0_PA14	23	2.076	1.184	18.809	15.042	16.733	13.858
QL296_25_B-2	P0_PA14	24	2.007	2.007	32.016	32.243	30.009	30.236
QL296_25_B-2	P0_PA14	25	2.634	2.634	26.763	28.892	24.129	26.258
QL296_25_B-2	P0_PA14	26	2.466	2.466	45.609	29.481	43.143	27.015
QL296_25_B-2	P0_PA14	27	2.526	2.526	31.486	23.45	28.96	20.924
QL296_25_B-2	P0_PA14	28	2.21	2.21	63.271	21.004	61.061	18.794
QL296_25_B-2	P0_PA14	29	1.968	1.36	41.081	27.541	39.113	26.181
QL296_25_B-2	P0_PA14	30	2.233	2.233	20.792	40.662	18.559	38.429
QL296_25_B-2	P0_PA14	31	1.551	0.826	37.861	19.944	36.31	19.118
QL296_25_B-2	P0_PA14	32	2.728	2.728	21.582	29.173	18.854	26.445

[truncated: 16 more sheets: QL296_25_B-3, QL296_25_B-4, FK181_25_B-1, FK181_20_B-1, FK181_20_B-2, FK181_25_B-2, FK181_25_B-3, FK181_(15)20_B-1, FK181_(15)20_B-2, FK181_(15)20_B-3, FK181_(15)20_B-4, FK181_(15)20_B-5, FK181_20_B-3, FK181_20_M-1, FK181_20_M-2, FK181_20_M-3]
