# Supplementary material for: Reported transgenerational responses to Pseudomonas aeruginosa in Caenorhabditis elegans are not robust
Source: eLife. 2025 Mar 26;13:RP100254. doi: 10.7554/eLife.100254 (PMC11942167; doi:10.7554/eLife.100254)
Supplement: Figure 5—source data 1. [file elife-100254-fig5-data1.xlsx]

## Sheet: Notes
This file contains the data plotted in Figure 5, Figure 5–figure supplement 1, and Figure 5-figure supplement 2
Experiment name	Strain/ genotype	growth temperature	PA14 source	age at start of P0 training	assay condition	Azide or cold-induce rigor	Notes
Exp_7	sid-1(qt9)	20°C	B	52 hours (20°C)	dark	C	N2 control data for P0 is shown in supplementary Figure 1– figure supplement 1 , P0-1. Insufficient F1's to continue the N2 experiment
Exp_8	sid-1(qt9)	25°C	B	48 hours (25°C)	light	C	N2 control data is experiment 5.1 and 5.2
Exp_9	sid-2(qt42)	20°C	B	52 hours (20°C)	dark	C	N2 control data for P0 is shown in supplementary Figure 1– figure supplement 1 , P0-2. Insufficient F1's to continue the N2 experiment
Exp_10	sid-2(qt42)	25°C	B	48 hours (25°C)	light	C	N2 control data is in the Exp_10 tab, distinguished by the genotype column.

## Sheet: Exp_7
gen	training_cond	OP50_choice	PA14_choice	choice_index	assay_cond	growth temp
P0	OP50	41	18	0.389831	dark	20
P0	OP50	92	52	0.277778	dark	20
P0	OP50	133	52	0.437838	dark	20
P0	OP50	47	13	0.566667	dark	20
P0	OP50	21	7	0.5	dark	20
P0	OP50	109	102	0.0331754	dark	20
P0	OP50	34	14	0.416667	dark	20
P0	OP50	140	108	0.129032	dark	20
P0	OP50	139	107	0.130081	dark	20
P0	OP50	22	34	-0.214286	dark	20
P0	OP50	138	134	0.0147059	dark	20
P0	OP50	37	37	0	dark	20
P0	OP50	34	64	-0.306122	dark	20
P0	OP50	61	76	-0.109489	dark	20
P0	OP50	98	97	0.00512821	dark	20
P0	PA14	93	26	0.563025	dark	20
P0	PA14	21	5	0.615385	dark	20
P0	PA14	72	16	0.636364	dark	20
P0	PA14	146	42	0.553191	dark	20
P0	PA14	144	55	0.447236	dark	20
P0	PA14	123	31	0.597403	dark	20
P0	PA14	145	22	0.736527	dark	20
P0	PA14	82	44	0.301587	dark	20
P0	PA14	173	43	0.601852	dark	20
P0	PA14	93	19	0.660714	dark	20
P0	PA14	96	24	0.6	dark	20
P0	PA14	97	25	0.590164	dark	20
P0	PA14	99	15	0.736842	dark	20
P0	PA14	84	23	0.570093	dark	20
P0	PA14	23	8	0.483871	dark	20
F1	OP50	195	153	0.12069	dark	20
F1	OP50	159	74	0.364807	dark	20
F1	OP50	90	67	0.146497	dark	20
F1	OP50	78	106	-0.152174	dark	20
F1	OP50	84	62	0.150685	dark	20
F1	OP50	313	262	0.0886957	dark	20
F1	OP50	163	190	-0.0764873	dark	20
F1	OP50	229	204	0.0577367	dark	20
F1	OP50	250	230	0.0416667	dark	20
F1	OP50	430	498	-0.0732759	dark	20
F1	PA14	45	64	-0.174312	dark	20
F1	PA14	7	7	0	dark	20
F1	PA14	133	135	-0.00746269	dark	20
F1	PA14	198	188	0.0259067	dark	20
F1	PA14	149	109	0.155039	dark	20
F1	PA14	113	108	0.0226244	dark	20
F1	PA14	68	41	0.247706	dark	20
F1	PA14	30	9	0.538462	dark	20
F1	PA14	40	49	-0.101124	dark	20
F1	PA14	16	19	-0.0857143	dark	20

## Sheet: Exp_8
gen	training_cond	OP50_choice	PA14_choice	choice_index	assay_cond	growth temp
P0	OP50	192	39	0.662338	light	25
P0	OP50	172	83	0.34902	light	25
P0	OP50	152	86	0.277311	light	25
P0	OP50	138	163	-0.0830565	light	25
P0	OP50	115	87	0.138614	light	25
P0	OP50	209	67	0.514493	light	25
P0	OP50	102	20	0.672131	light	25
P0	OP50	85	47	0.287879	light	25
P0	OP50	201	82	0.420495	light	25
P0	OP50	67	114	-0.259669	light	25
P0	PA14	148	2	0.973333	light	25
P0	PA14	264	9	0.934066	light	25
P0	PA14	284	29	0.814696	light	25
P0	PA14	179	10	0.89418	light	25
P0	PA14	362	85	0.619687	light	25
P0	PA14	264	17	0.879004	light	25
P0	PA14	236	25	0.808429	light	25
P0	PA14	248	17	0.871698	light	25
P0	PA14	197	2	0.979899	light	25
P0	PA14	126	2	0.96875	light	25
F1	OP50	106	102	0.0192308	light	25
F1	OP50	103	97	0.03	light	25
F1	OP50	113	117	-0.0173913	light	25
F1	OP50	72	80	-0.0526316	light	25
F1	OP50	53	50	0.0291262	light	25
F1	OP50	105	101	0.0194175	light	25
F1	OP50	83	57	0.185714	light	25
F1	OP50	50	49	0.010101	light	25
F1	OP50	69	65	0.0298507	light	25
F1	OP50	55	47	0.0784314	light	25
F1	OP50	53	64	-0.0940171	light	25
F1	OP50	120	93	0.126761	light	25
F1	PA14	74	73	0.00680272	light	25
F1	PA14	83	69	0.0921053	light	25
F1	PA14	33	31	0.03125	light	25
F1	PA14	69	68	0.00729927	light	25
F1	PA14	41	50	-0.0989011	light	25
F1	PA14	43	61	-0.173077	light	25
F1	PA14	51	50	0.00990099	light	25
F1	PA14	79	70	0.0604027	light	25

## Sheet: Exp_9
gen	training_cond	OP50_choice	PA14_choice	choice_index	assay_cond	growth temp
P0	OP50	63	67	-0.0307692	dark	20
P0	OP50	84	61	0.158621	dark	20
P0	OP50	83	91	-0.045977	dark	20
P0	OP50	12	12	0	dark	20
P0	OP50	34	20	0.259259	dark	20
P0	OP50	48	44	0.0434783	dark	20
P0	OP50	139	81	0.263636	dark	20
P0	OP50	37	23	0.233333	dark	20
P0	OP50	124	151	-0.0981818	dark	20
P0	OP50	90	79	0.0650888	dark	20
P0	OP50	158	183	-0.0733138	dark	20
P0	OP50	93	120	-0.126761	dark	20
P0	OP50	175	167	0.0233918	dark	20
P0	OP50	45	26	0.267606	dark	20
P0	OP50	38	21	0.288136	dark	20
P0	PA14	472	64	0.761194	dark	20
P0	PA14	222	36	0.72093	dark	20
P0	PA14	188	27	0.748837	dark	20
P0	PA14	73	5	0.871795	dark	20
P0	PA14	230	60	0.586207	dark	20
P0	PA14	283	71	0.59887	dark	20
P0	PA14	399	58	0.746171	dark	20
P0	PA14	450	75	0.714286	dark	20
P0	PA14	315	32	0.815562	dark	20
P0	PA14	89	17	0.679245	dark	20
P0	PA14	104	15	0.747899	dark	20
P0	PA14	218	17	0.855319	dark	20
P0	PA14	285	36	0.775701	dark	20
P0	PA14	79	5	0.880952	dark	20
P0	PA14	132	16	0.783784	dark	20
F1	OP50	375	335	0.056338	dark	20
F1	OP50	409	311	0.136111	dark	20
F1	OP50	399	355	0.0583554	dark	20
F1	OP50	419	316	0.140136	dark	20
F1	OP50	366	319	0.0686131	dark	20
F1	OP50	308	248	0.107914	dark	20
F1	OP50	289	212	0.153693	dark	20
F1	OP50	347	235	0.19244	dark	20
F1	OP50	453	293	0.214477	dark	20
F1	OP50	295	263	0.0573477	dark	20
F1	PA14	118	120	-0.00840336	dark	20
F1	PA14	101	97	0.020202	dark	20
F1	PA14	159	84	0.308642	dark	20
F1	PA14	146	65	0.383886	dark	20
F1	PA14	134	90	0.196429	dark	20
F1	PA14	161	94	0.262745	dark	20
F1	PA14	219	114	0.315315	dark	20
F1	PA14	172	97	0.27881	dark	20
F1	PA14	166	91	0.291829	dark	20
F1	PA14	208	95	0.372937	dark	20
F1	PA14	266	283	-0.0309654	dark	20
F1	PA14	178	154	0.0722892	dark	20
F1	PA14	270	203	0.141649	dark	20
F1	PA14	361	232	0.217538	dark	20
F1	PA14	121	96	0.115207	dark	20

## Sheet: Exp_10
genotype	gen	training_cond	OP50_choice	PA14_choice	choice_index	assay_cond	growth temp
sid-2(qt42)	P0	OP50	48	88	-0.294118	light	25
sid-2(qt42)	P0	OP50	41	87	-0.359375	light	25
sid-2(qt42)	P0	OP50	71	77	-0.0405405	light	25
sid-2(qt42)	P0	OP50	58	76	-0.134328	light	25
sid-2(qt42)	P0	OP50	103	127	-0.104348	light	25
sid-2(qt42)	P0	OP50	56	79	-0.17037	light	25
sid-2(qt42)	P0	OP50	77	115	-0.197917	light	25
sid-2(qt42)	P0	OP50	75	74	0.00671141	light	25
sid-2(qt42)	P0	OP50	72	89	-0.10559	light	25
sid-2(qt42)	P0	OP50	73	81	-0.0519481	light	25
sid-2(qt42)	P0	PA14	105	17	0.721311	light	25
sid-2(qt42)	P0	PA14	81	12	0.741935	light	25
sid-2(qt42)	P0	PA14	118	14	0.787879	light	25
sid-2(qt42)	P0	PA14	136	34	0.6	light	25
sid-2(qt42)	P0	PA14	168	27	0.723077	light	25
sid-2(qt42)	P0	PA14	214	24	0.798319	light	25
sid-2(qt42)	P0	PA14	156	22	0.752809	light	25
sid-2(qt42)	P0	PA14	186	40	0.646018	light	25
sid-2(qt42)	F1	OP50	131	73	0.284314	light	25
sid-2(qt42)	F1	OP50	130	58	0.382979	light	25
sid-2(qt42)	F1	OP50	105	34	0.510791	light	25
sid-2(qt42)	F1	OP50	155	43	0.565657	light	25
sid-2(qt42)	F1	OP50	221	81	0.463576	light	25
sid-2(qt42)	F1	OP50	126	72	0.272727	light	25
sid-2(qt42)	F1	OP50	121	43	0.47561	light	25
sid-2(qt42)	F1	OP50	101	56	0.286624	light	25
sid-2(qt42)	F1	PA14	63	23	0.465116	light	25
sid-2(qt42)	F1	PA14	47	14	0.540984	light	25
sid-2(qt42)	F1	PA14	76	32	0.407407	light	25
sid-2(qt42)	F1	PA14	37	8	0.644444	light	25
sid-2(qt42)	F1	PA14	16	8	0.333333	light	25
sid-2(qt42)	F1	PA14	73	32	0.390476	light	25
sid-2(qt42)	F1	PA14	120	43	0.472393	light	25
N2	P0	OP50	59	84	-0.174825	light	25
N2	P0	OP50	74	140	-0.308411	light	25
N2	P0	OP50	118	91	0.129187	light	25
N2	P0	OP50	118	75	0.222798	light	25
N2	P0	OP50	103	67	0.211765	light	25
N2	P0	OP50	97	73	0.141176	light	25
N2	P0	OP50	95	79	0.091954	light	25
N2	P0	OP50	65	159	-0.419643	light	25
N2	P0	OP50	63	148	-0.402844	light	25
N2	P0	PA14	30	1	0.935484	light	25
N2	P0	PA14	253	18	0.867159	light	25
N2	P0	PA14	120	10	0.846154	light	25
N2	P0	PA14	24	0	1	light	25
N2	P0	PA14	52	3	0.890909	light	25
N2	P0	PA14	80	5	0.882353	light	25
N2	P0	PA14	81	12	0.741935	light	25
N2	P0	PA14	83	8	0.824176	light	25
N2	F1	OP50	96	84	0.0666667	light	25
N2	F1	OP50	146	72	0.33945	light	25
N2	F1	OP50	183	114	0.232323	light	25
N2	F1	OP50	190	98	0.319444	light	25
N2	F1	OP50	168	49	0.548387	light	25
N2	F1	OP50	149	71	0.354545	light	25
N2	F1	OP50	50	49	0.010101	light	25
N2	F1	PA14	85	25	0.545455	light	25
N2	F1	PA14	187	9	0.908163	light	25
N2	F1	PA14	182	34	0.685185	light	25
N2	F1	PA14	140	31	0.637427	light	25
N2	F1	PA14	87	35	0.42623	light	25
N2	F1	PA14	160	56	0.481481	light	25
N2	F1	PA14	154	28	0.692308	light	25
N2	F1	PA14	114	25	0.640288	light	25
