# Supplementary material for: Reported transgenerational responses to Pseudomonas aeruginosa in Caenorhabditis elegans are not robust
Source: eLife. 2025 Mar 26;13:RP100254. doi: 10.7554/eLife.100254 (PMC11942167; doi:10.7554/eLife.100254)
Supplement: Figure 6—source data 1. — This data is plotted in Figure 6, Figure 6—figure supplement 1. [file elife-100254-fig6-data1.xlsx]

## Sheet: Description
This file contains re-analyzed differential gene expression results of RNA-seq data from PRJNA509938 (Moore et al., 2019)
This data is plotted in Figure 6 and Figure 6–figure supplement 1

## Sheet: mRNA_results_df
	baseMean	log2FoldChange	lfcSE	stat	pvalue	padj
WBGene00000001	461.694	-0.285836	0.105255	-2.71565	0.00661468	0.0156805
WBGene00000002	86.2169	0.730013	0.321181	2.2729	0.0230321	0.0463937
WBGene00000003	95.7514	0.29716	0.204794	1.45102	0.146773	0.222027
WBGene00000004	94.6183	0.0878537	0.209298	0.419753	0.674666	0.746569
WBGene00000005	28.4525	-0.374462	0.280724	-1.33392	0.182231	0.264895
WBGene00000006	29.8633	1.32983	0.2547	5.22117	1.77798e-07	1.1866e-06
WBGene00000007	67.7055	1.45045	0.172031	8.43133	3.41772e-17	8.10626e-16
WBGene00000008	1.85814	-1.35272	0.983453	-1.37548	0.168983	0.249177
WBGene00000009	4.25225	0.827208	0.59956	1.37969	0.167681	0.247527
WBGene00000010	100.152	-0.159376	0.192804	-0.826622	0.408452	0.505487
WBGene00000012	2.45745	0.837856	0.760444	1.1018	0.270549	0.363549
WBGene00000013	2.91148	-0.548287	0.76588	-0.715891	0.474059	0.568825
WBGene00000014	0	NA	NA	NA	NA	NA
WBGene00000015	0.201539	1.22023	2.59861	0.46957	0.638662	NA
WBGene00000016	12.6058	2.1505	0.565922	3.8	0.000144697	0.00053141
WBGene00000017	38.7562	1.66084	0.260339	6.37951	1.77652e-10	1.95604e-09
WBGene00000018	597.01	0.0733682	0.125889	0.582798	0.560029	0.64893
WBGene00000019	5.60221	1.00383	0.487909	2.05741	0.0396465	0.0743304
WBGene00000020	231.094	2.00548	0.166441	12.0492	1.95872e-33	1.28355e-31
WBGene00000021	0.821964	2.43278	1.67901	1.44894	0.147355	0.222716
WBGene00000022	1014.57	2.55255	0.148756	17.1594	5.35043e-66	1.08232e-63
WBGene00000023	6.68809	-0.246641	0.529006	-0.466234	0.641048	0.718312
WBGene00000024	0.723667	1.81282	1.50099	1.20775	0.227144	0.316559
WBGene00000025	0	NA	NA	NA	NA	NA
WBGene00000026	0.0564648	-0.677547	3.11654	-0.217404	0.827894	NA
WBGene00000027	0.242515	0.284245	2.48184	0.11453	0.908818	NA
WBGene00000028	0	NA	NA	NA	NA	NA
WBGene00000029	0	NA	NA	NA	NA	NA
WBGene00000030	0.279091	1.62584	2.04551	0.794831	0.426712	NA
WBGene00000031	31.5062	3.2991	0.821909	4.01395	5.97115e-05	0.00023743
WBGene00000032	0.388403	1.9211	1.89041	1.01624	0.309517	NA
WBGene00000033	5.02031	3.02841	0.918556	3.29693	0.000977495	0.00290787
WBGene00000034	5.95663	2.89464	0.780086	3.71067	0.00020671	0.000732705
WBGene00000035	58.7812	0.780133	0.216666	3.60062	0.000317455	0.00107008
WBGene00000036	153.994	1.13273	0.229968	4.9256	8.4102e-07	4.91895e-06
WBGene00000037	25.0273	1.87734	0.502066	3.73922	0.000184589	0.000662685
WBGene00000038	1.47832	1.65097	1.16594	1.416	0.156776	0.234172
WBGene00000039	180.877	1.72607	0.716566	2.40881	0.0160045	0.0338944
WBGene00000040	3201.45	-0.239087	0.186131	-1.28451	0.198964	0.284564
WBGene00000041	7714.99	-0.809479	0.156819	-5.16187	2.44493e-07	1.59187e-06
WBGene00000042	2.16618	1.00139	0.861717	1.16208	0.245201	0.336397
WBGene00000043	2.52675	1.12239	0.844901	1.32843	0.184036	0.267144
WBGene00000044	9.79408	0.703647	0.404895	1.73785	0.0822371	0.137375
WBGene00000045	0.615378	0.888296	1.91371	0.464174	0.642523	0.719553
WBGene00000046	5.33136	1.23754	0.626684	1.97474	0.0482976	0.0879059
WBGene00000047	20.9528	1.73128	0.37931	4.56429	5.01196e-06	2.51441e-05
WBGene00000048	4.08712	1.70474	0.650545	2.62047	0.0087808	0.0200667
WBGene00000049	0.937761	2.73269	1.30277	2.09761	0.03594	0.0682685
WBGene00000050	8.00573	1.53	0.424304	3.60589	0.00031108	0.00105081
WBGene00000051	14.5988	1.46553	0.365293	4.01194	6.02228e-05	0.000239246
WBGene00000053	1.95394	2.29145	1.29594	1.76817	0.0770325	0.130143
WBGene00000054	9.65667	1.04243	0.395976	2.63255	0.00847462	0.01943
WBGene00000055	21.9032	-0.0429513	0.261376	-0.164328	0.869473	0.903137
WBGene00000056	4.23222	2.13893	0.703343	3.0411	0.00235718	0.00635772
WBGene00000057	5.19731	-0.25128	0.569259	-0.441415	0.658913	0.733658
WBGene00000058	6.64015	1.04824	0.537831	1.949	0.051295	0.0924749
WBGene00000059	7.97454	0.577694	0.486372	1.18776	0.234927	0.325114
WBGene00000060	1.14922	1.84796	1.18267	1.56253	0.118162	0.18564
WBGene00000061	8.51965	2.1389	0.585147	3.65533	0.000256853	0.000887739
WBGene00000062	1.96255	0.606707	0.850592	0.713276	0.475675	0.570208
WBGene00000063	9117.24	-0.525416	0.164672	-3.19069	0.00141934	0.00405965
WBGene00000064	9449.57	-1.25234	0.126296	-9.91591	3.55018e-23	1.38229e-21
WBGene00000065	5136.36	-0.844762	0.16204	-5.2133	1.85511e-07	1.2334e-06
WBGene00000066	4198.47	-0.281262	0.165105	-1.70354	0.0884677	0.146219
WBGene00000067	3031.65	1.33612	0.133282	10.0248	1.18658e-23	4.76771e-22
WBGene00000068	168.493	1.08845	0.213856	5.08962	3.58787e-07	2.26725e-06
WBGene00000069	8.06182	1.28223	0.456716	2.8075	0.00499278	0.0122534
WBGene00000070	193.978	1.55489	0.24834	6.26114	3.82164e-10	4.02496e-09
WBGene00000071	53.1946	0.894592	0.206706	4.32785	1.50573e-05	6.84917e-05
WBGene00000072	62.7688	0.736065	0.233665	3.15009	0.00163218	0.00460111
WBGene00000073	67.8495	0.0554136	0.163765	0.338373	0.735082	0.796595
WBGene00000074	310.024	0.424851	0.136796	3.10572	0.00189815	0.00526142
WBGene00000075	109.101	-0.567887	0.205304	-2.76608	0.00567342	0.0137114
WBGene00000079	1219.72	-0.185853	0.071013	-2.61717	0.00886623	0.0202382
WBGene00000080	583.26	-0.484962	0.0801436	-6.05117	1.438e-09	1.37839e-08
WBGene00000081	839.789	0.589798	0.136545	4.31944	1.56426e-05	7.08427e-05
WBGene00000082	18.7607	2.23737	0.536954	4.16678	3.08928e-05	0.000130724
WBGene00000083	183.506	-0.805336	0.202764	-3.97178	7.13372e-05	0.000279675
WBGene00000084	145.495	1.22932	0.184149	6.6757	2.46061e-11	3.04745e-10
WBGene00000085	4.76417	0.777187	0.547358	1.41989	0.15564	0.232704
WBGene00000086	174.156	2.18689	0.20552	10.6407	1.92606e-26	9.18612e-25
WBGene00000088	60.3345	1.29544	0.195342	6.63164	3.31981e-11	4.0349e-10
WBGene00000089	34.4228	1.48394	0.285087	5.20521	1.93782e-07	1.28451e-06
WBGene00000090	1295.41	-0.410657	0.101273	-4.05496	5.01423e-05	0.000202491
WBGene00000092	106.098	0.355818	0.151838	2.34341	0.0191084	0.0395308
WBGene00000093	65.1205	-0.200785	0.209266	-0.959472	0.337321	0.434411
WBGene00000094	70.4092	-0.8911	0.178388	-4.99528	5.87501e-07	3.55429e-06
WBGene00000095	84.1933	0.37722	0.175906	2.14444	0.0319977	0.0618482
WBGene00000096	9.32278	1.94385	0.541589	3.58916	0.000331748	0.00111272
WBGene00000097	115.46	0.0576106	0.205073	0.280927	0.778766	0.833094
WBGene00000098	1292.2	-0.780202	0.113909	-6.84934	7.41938e-12	9.82495e-11
WBGene00000099	476.972	-0.713982	0.14917	-4.78636	1.69835e-06	9.36087e-06
WBGene00000100	1121.16	1.47288	0.232649	6.33089	2.43758e-10	2.63023e-09
WBGene00000101	5757.3	-0.598172	0.183112	-3.26669	0.00108812	0.00319644
WBGene00000102	1507.56	-0.625141	0.100985	-6.19041	6.00063e-10	6.15773e-09
WBGene00000103	167.927	1.27388	0.209966	6.0671	1.3024e-09	1.26216e-08
WBGene00000105	2026.05	0.827616	0.152765	5.41756	6.04176e-08	4.33819e-07
WBGene00000106	1131.6	-0.260495	0.090739	-2.87082	0.00409411	0.0103005
WBGene00000107	855.238	-0.579182	0.166175	-3.48537	0.000491456	0.00157773
WBGene00000108	0	NA	NA	NA	NA	NA
WBGene00000109	995.881	0.700925	0.142572	4.9163	8.8195e-07	5.12936e-06
WBGene00000110	1003.71	-0.254828	0.102766	-2.47968	0.0131499	0.0285674
WBGene00000111	40.7185	-0.488136	0.266389	-1.83242	0.0668892	0.115478
WBGene00000112	474.336	-0.144734	0.120267	-1.20344	0.228805	0.318319
WBGene00000113	217.748	0.198906	0.116905	1.70143	0.0888616	0.146788
WBGene00000114	4497.15	0.478747	0.104365	4.58722	4.49182e-06	2.27029e-05
WBGene00000115	1329.29	-1.41435	0.164889	-8.5776	9.68733e-18	2.40462e-16
WBGene00000116	40.0305	-0.216086	0.209853	-1.0297	0.303149	0.398114
WBGene00000117	189.698	0.0745891	0.121109	0.615882	0.537972	0.628462
WBGene00000118	330.218	-0.433132	0.139108	-3.11364	0.00184795	0.00513372
WBGene00000120	98.8764	-0.0658142	0.261023	-0.25214	0.800933	0.850928
WBGene00000121	385.339	-0.714843	0.183356	-3.89867	9.67242e-05	0.000370054
WBGene00000122	828.484	-0.41497	0.11256	-3.68667	0.000227205	0.000797326
WBGene00000123	3144.31	-0.0261396	0.140401	-0.186178	0.852305	0.890438
WBGene00000133	2.32036	-4.24554	1.29632	-3.27506	0.0010564	0.00311312
WBGene00000134	1.36268	1.10918	1.11923	0.991016	0.321678	0.418233
WBGene00000135	12.9144	1.6111	0.362799	4.44074	8.96497e-06	4.26879e-05
WBGene00000136	97.264	-0.602718	0.270756	-2.22606	0.0260103	0.051644
WBGene00000137	306.526	-0.135734	0.118426	-1.14615	0.251735	0.343325
WBGene00000138	50.1905	0.87909	0.213224	4.12285	3.74219e-05	0.000155401
WBGene00000139	21.0426	0.132553	0.279148	0.474848	0.634895	0.713371
WBGene00000140	5314.02	0.977339	0.0986258	9.90956	3.783e-23	1.46645e-21
WBGene00000142	766.284	-0.748693	0.149168	-5.01912	5.19088e-07	3.17202e-06
WBGene00000143	269.007	-0.688783	0.100157	-6.87705	6.11057e-12	8.17173e-11
WBGene00000144	30.2345	-0.603695	0.299787	-2.01375	0.0440363	0.081296
WBGene00000145	88.8269	-1.32	0.248048	-5.32152	1.02901e-07	7.10736e-07
WBGene00000146	3610.51	-0.479892	0.205718	-2.33276	0.0196606	0.0404591
WBGene00000147	397.878	-0.294939	0.134505	-2.19277	0.0283238	0.0555399
WBGene00000148	439.945	-0.409239	0.0975315	-4.19596	2.71714e-05	0.000116461
WBGene00000149	1491.63	1.51647	0.198014	7.65839	1.88278e-14	3.40196e-13
WBGene00000150	181.542	1.89867	0.14795	12.8332	1.06803e-37	8.66186e-36
WBGene00000151	321.728	-0.308409	0.124805	-2.47112	0.013469	0.0291491
WBGene00000155	2319.26	-0.626668	0.144335	-4.34178	1.41336e-05	6.46929e-05
WBGene00000156	2933.15	-0.405674	0.1332	-3.0456	0.00232213	0.00627663
WBGene00000157	251.805	-0.0724716	0.119346	-0.607238	0.543693	0.633966
WBGene00000158	1861.2	-0.018003	0.134762	-0.133591	0.893726	0.922171
WBGene00000159	435.579	-0.142845	0.102262	-1.39686	0.162457	0.241354
WBGene00000160	1381.05	0.12028	0.0718453	1.67415	0.0941009	0.153797
WBGene00000161	764.155	0.222342	0.0877981	2.53242	0.0113277	0.0250196
WBGene00000162	546.326	-0.0950529	0.0848916	-1.1197	0.262843	0.355527
WBGene00000163	1080.26	0.0515904	0.0772801	0.667576	0.504404	0.597015
WBGene00000164	105.284	-0.272319	0.134331	-2.02721	0.0426404	0.0791011
WBGene00000165	569.746	-0.471152	0.0938005	-5.02292	5.08927e-07	3.11534e-06
WBGene00000166	10.1136	0.918244	0.469892	1.95416	0.0506823	0.0915391
WBGene00000168	563.231	-0.512868	0.15241	-3.36505	0.000765311	0.00233265
WBGene00000169	40.1544	-2.28871	0.482631	-4.74216	NA	NA
WBGene00000170	1301.09	1.35441	0.493761	2.74305	0.00608717	0.0145594
WBGene00000171	11.443	2.9695	0.482692	6.15196	7.65321e-10	7.73629e-09
WBGene00000172	42.3468	1.73267	0.273283	6.34019	2.29477e-10	2.48374e-09
WBGene00000173	2.03572	3.30391	1.02438	3.22528	0.00125852	0.00364355
WBGene00000174	2.76222	2.14757	0.819026	2.6221	0.00873908	0.0199843
WBGene00000175	293.806	-1.29652	0.15822	-8.19442	2.51804e-16	5.47099e-15
WBGene00000176	227.712	1.00685	0.32245	3.1225	0.00179321	0.00500138
WBGene00000177	5.30215	-0.296402	0.528063	-0.561299	0.574593	0.661322
WBGene00000178	313.6	0.678455	0.122958	5.5178	3.43277e-08	2.5534e-07
WBGene00000179	53.7623	0.274808	0.193852	1.41762	0.156303	0.233591
WBGene00000180	121.804	0.465365	0.173231	2.68639	0.00722297	0.0169196
WBGene00000181	814.102	-0.465003	0.163738	-2.83992	0.0045125	0.0111979
WBGene00000182	2366.52	-0.0273786	0.0730926	-0.374575	0.707977	0.774134
WBGene00000183	996.954	-0.24478	0.0902983	-2.71079	0.00671221	0.0158775
WBGene00000184	26.6183	-0.561658	0.228037	-2.46301	0.0137774	0.0297326
WBGene00000185	0.200559	0.284244	2.61725	0.108604	0.913517	NA
WBGene00000186	775.24	-0.207455	0.106035	-1.95648	0.0504089	0.0910921
WBGene00000187	329.578	-0.121943	0.118125	-1.03233	0.301919	0.396972
WBGene00000188	13.7749	1.54495	0.454233	3.40123	0.000670826	0.0020807
WBGene00000189	24.0837	-0.118502	0.395258	-0.299809	0.764323	0.821054
WBGene00000190	3.50446	1.86849	1.07985	1.73031	0.0835746	0.139296
WBGene00000191	7.37049	2.6651	0.615811	4.32778	1.5062e-05	6.8495e-05
WBGene00000192	877.218	-0.459371	0.118525	-3.87574	0.000106301	0.000402407
WBGene00000193	2.53816	1.5934	0.797488	1.99802	0.0457141	0.0838764
WBGene00000195	145.824	0.15815	0.138257	1.14389	0.252671	0.344256
WBGene00000196	217.759	-0.500134	0.105176	-4.75522	1.98233e-06	1.08009e-05
WBGene00000197	3687.43	-0.22296	0.136286	-1.63597	0.101846	0.164168
WBGene00000198	603.092	-0.308072	0.104097	-2.95948	0.0030816	0.00804048
WBGene00000199	641.09	0.0410832	0.0789429	0.520416	0.602774	0.686216
WBGene00000200	1334.42	0.133415	0.120979	1.10279	0.270117	0.363048
WBGene00000201	653.89	0.0478397	0.0908266	0.526714	0.598392	0.682375
WBGene00000202	398.375	-0.449325	0.1148	-3.91398	9.07872e-05	0.000349467
WBGene00000203	74.8976	-0.021052	0.23367	-0.0900927	0.928214	0.94807
WBGene00000204	335.448	-0.276415	0.0879156	-3.1441	0.00166599	0.00468667
WBGene00000205	229.694	-0.0876763	0.109304	-0.802134	0.422476	0.519069
WBGene00000206	734.51	-0.808241	0.134262	-6.01987	1.74561e-09	1.64724e-08
WBGene00000207	1621.09	-0.486163	0.149798	-3.24546	0.00117262	0.00342352
WBGene00000208	474.531	1.12578	0.0994199	11.3235	1.00434e-29	5.57581e-28
WBGene00000209	305.99	-0.911242	0.181388	-5.02373	5.06777e-07	3.10326e-06
WBGene00000210	143.442	-0.459184	0.173209	-2.65104	0.00802453	0.0185576
WBGene00000211	97.9187	0.535593	0.213867	2.50433	0.0122683	0.0268211
WBGene00000212	18.0159	0.142547	0.285395	0.499472	0.617447	0.698628
WBGene00000213	15.013	0.701821	0.50604	1.38689	0.165476	0.245053
WBGene00000214	13010	1.08348	0.241363	4.489	7.15596e-06	3.48183e-05
WBGene00000215	2890.22	-0.974755	0.127544	-7.64251	2.13023e-14	3.8216e-13
WBGene00000216	3682.12	0.150002	0.251794	0.595733	0.551354	0.64103
WBGene00000217	1965.08	-0.612872	0.14682	-4.17432	2.98875e-05	0.000126867
WBGene00000218	947.192	-1.1217	0.24463	-4.58527	4.53396e-06	2.29028e-05
WBGene00000219	10635.3	1.35902	0.221404	6.13816	8.34816e-10	8.38101e-09
WBGene00000220	128.112	1.69894	0.642978	2.64229	0.00823473	0.0189776
WBGene00000221	651.321	-0.371538	0.180582	-2.05745	0.0396433	0.0743304
WBGene00000222	173.655	0.541767	0.141309	3.83392	0.000126117	0.000469642
WBGene00000223	2381.75	0.139059	0.110157	1.26237	0.206815	0.293773
WBGene00000224	304.512	0.92351	0.207642	4.44761	8.68328e-06	4.14588e-05
WBGene00000225	107.952	0.338859	0.154494	2.19335	0.0282819	0.0554728
WBGene00000226	2277.42	-0.529765	0.167738	-3.15828	0.00158704	0.00448608
WBGene00000227	948.214	-0.110033	0.15358	-0.716452	0.473712	0.568525
WBGene00000228	1315.91	0.349249	0.120129	2.90728	0.00364591	0.00930322
WBGene00000229	6211.4	-0.709608	0.112533	-6.30575	2.86795e-10	3.06454e-09
WBGene00000230	4380.49	-0.166264	0.108982	-1.5256	0.127109	0.196988
WBGene00000231	1313.25	-0.163173	0.13431	-1.2149	0.224405	0.313512
WBGene00000232	17.3926	1.05797	0.372212	2.84239	0.00447772	0.0111273
WBGene00000233	117.984	1.16451	0.168761	6.90031	5.189e-12	7.00853e-11
WBGene00000235	190.521	-0.0808763	0.165018	-0.490106	0.624059	0.704252
WBGene00000236	530.013	-0.430054	0.139414	-3.08472	0.00203743	0.00559301
WBGene00000237	298.951	1.68438	0.237755	7.08449	1.39557e-12	2.01979e-11
WBGene00000238	49.0742	1.45741	0.250904	5.80865	6.29778e-09	5.38294e-08
WBGene00000239	115.698	-0.254562	0.190914	-1.33339	0.182404	0.265103
WBGene00000240	302.088	1.06839	0.204006	5.23707	1.63145e-07	1.09587e-06
WBGene00000241	7.67883	2.38749	0.661541	3.60898	0.0003074	0.00104037
WBGene00000242	13.9514	1.85633	0.416836	4.45338	8.4529e-06	4.04246e-05
WBGene00000244	8.35129	1.75989	0.568862	3.0937	0.00197676	0.00544683
WBGene00000245	31.6572	-1.12118	0.230304	-4.86826	1.12587e-06	6.41233e-06
WBGene00000246	10.2782	-0.225472	0.373119	-0.60429	0.545651	0.635828
WBGene00000247	346.674	0.00554632	0.12889	0.0430315	0.965676	0.975543
WBGene00000248	261.29	-0.0592608	0.104383	-0.567728	0.57022	0.657664
WBGene00000249	318.551	-0.719541	0.14297	-5.0328	4.83363e-07	2.97541e-06
WBGene00000250	397.266	-0.506297	0.101226	-5.00167	5.68355e-07	3.44794e-06
WBGene00000251	7.75818	0.548239	0.727562	0.753529	0.451132	0.546645
WBGene00000252	4.52033	0.554918	0.656104	0.845777	0.397677	0.494889
WBGene00000253	239.796	0.207125	0.134318	1.54205	0.123061	0.191863
WBGene00000254	835.426	0.0165661	0.0874369	0.189464	0.849729	0.888608
WBGene00000255	0.885188	-0.685357	1.46821	-0.466797	0.640645	0.717979
WBGene00000256	9.42584	0.495584	0.402097	1.2325	0.217762	0.306249
WBGene00000257	1135.45	-0.486278	0.0841033	-5.78192	7.38544e-09	6.23987e-08
WBGene00000259	224.879	-0.132702	0.104032	-1.27559	0.202099	0.288275
WBGene00000262	58.8311	-0.0782217	0.225815	-0.346397	0.729044	0.791719
WBGene00000263	546.127	-0.209232	0.165613	-1.26338	0.206452	0.293379
WBGene00000264	146.111	-0.740928	0.123971	-5.97662	2.27815e-09	2.11239e-08
WBGene00000265	169.736	-0.917386	0.111441	-8.23206	1.84023e-16	4.05841e-15
WBGene00000266	165.086	1.50416	0.213089	7.05885	1.67887e-12	2.40214e-11
WBGene00000267	30.2425	1.20157	0.272204	4.41421	1.01378e-05	4.78709e-05
WBGene00000268	521.957	0.56818	0.139933	4.06036	4.8997e-05	0.000198457
WBGene00000269	81.3923	-0.0129322	0.153413	-0.0842962	0.932821	0.95152
WBGene00000270	73.2129	-0.545924	0.175996	-3.10191	0.00192275	0.00531633
WBGene00000271	730.278	-0.61254	0.127107	-4.8191	1.44207e-06	8.03387e-06
WBGene00000272	8.7803	1.95834	0.553651	3.53714	0.000404479	0.00132831
WBGene00000273	1047.06	0.140642	0.197688	0.711435	0.476815	0.571198
WBGene00000274	914.697	-0.364494	0.142984	-2.5492	0.0107971	0.0240012
WBGene00000275	2597.57	-0.58843	0.116509	-5.05052	4.40603e-07	2.73613e-06
WBGene00000276	299.589	0.479797	0.117587	4.08037	4.4964e-05	0.000183431
WBGene00000277	724.571	1.49878	0.17293	8.66699	4.43693e-18	1.13496e-16
WBGene00000279	6.78033	0.613777	0.493309	1.2442	0.213425	0.301571
WBGene00000280	6.1793	2.29417	0.587799	3.90298	9.50163e-05	0.00036455
WBGene00000281	338.882	0.440184	0.188025	2.34109	0.0192274	0.039735
WBGene00000282	559.457	0.337094	0.18835	1.78972	0.0734997	0.125133
WBGene00000283	173.862	-0.483311	0.212753	-2.2717	0.0231049	0.0465085
WBGene00000284	106.101	1.59296	0.283838	5.61222	1.99744e-08	1.55269e-07
WBGene00000285	11.192	0.833026	0.455579	1.8285	0.0674745	0.116329
WBGene00000286	35.113	2.0098	0.253649	7.92357	2.30794e-15	4.55352e-14
WBGene00000287	1.95	1.65875	0.938179	1.76806	0.0770513	0.130149
WBGene00000288	22.7637	1.43582	0.329378	4.3592	1.30539e-05	6.01558e-05
WBGene00000289	2010.93	0.0785107	0.125405	0.626057	0.531277	0.622086
WBGene00000292	993.947	0.182482	0.0638014	2.86016	0.00423427	0.0106077
WBGene00000293	1012.03	0.437303	0.135544	3.22628	0.00125413	0.00363495
WBGene00000294	619.822	1.06362	0.12393	8.5824	9.2915e-18	2.30962e-16
WBGene00000295	5.47708	0.890376	0.641023	1.38899	0.164835	0.244291
WBGene00000296	3.83933	0.808291	0.60541	1.33511	0.181839	0.264391
WBGene00000298	147.339	0.94869	0.290872	3.26154	0.00110807	0.00325124
WBGene00000301	2337.46	-0.0271772	0.225859	-0.120328	0.904223	0.93012
WBGene00000302	73.8455	3.59079	0.320106	11.2175	3.34569e-29	1.81172e-27
WBGene00000308	0	NA	NA	NA	NA	NA
WBGene00000310	0	NA	NA	NA	NA	NA
WBGene00000311	0	NA	NA	NA	NA	NA
WBGene00000366	4024.38	-0.0177414	0.0992957	-0.178673	0.858195	0.894961
WBGene00000367	149.175	1.05843	0.132003	8.01822	1.07289e-15	2.18538e-14
WBGene00000368	58.5577	1.09815	0.23868	4.60093	4.20601e-06	2.13777e-05
WBGene00000369	1560.99	-0.431144	0.101025	-4.26771	1.97488e-05	8.73702e-05
WBGene00000370	399.673	0.308721	0.104062	2.96671	0.00301001	0.00787471
WBGene00000371	312.081	-0.619032	0.185049	-3.34524	0.00082211	0.00248768
WBGene00000372	4.11504	1.11521	0.560462	1.98981	0.0466122	0.0853264
WBGene00000373	134.356	1.83303	0.204262	8.97391	2.86182e-19	8.19309e-18
WBGene00000374	60.9036	0.38956	0.210112	1.85406	0.063731	0.110962
WBGene00000375	363.106	-0.738875	0.162877	-4.53641	5.72198e-06	2.83985e-05
WBGene00000376	6481.85	-0.526814	0.141369	-3.72653	0.000194134	0.000693717
WBGene00000377	3436.23	-0.444894	0.112327	-3.96072	7.47247e-05	0.000291981
WBGene00000378	3125.14	-0.390621	0.121323	-3.21967	0.00128338	0.00370995
WBGene00000379	3120.67	-0.379124	0.103689	-3.65637	0.000255807	0.000884644
WBGene00000380	2485.89	-0.251432	0.120947	-2.07886	0.03763	0.0711222
WBGene00000381	2457.64	-0.204254	0.106499	-1.9179	0.0551242	0.0981715
WBGene00000382	1476.75	-0.357945	0.097527	-3.67021	0.000242348	0.000843904
WBGene00000383	2586.85	-0.104048	0.10679	-0.974323	0.329896	0.426806
WBGene00000386	1572.88	-0.853903	0.111678	-7.64612	2.07134e-14	3.71974e-13
WBGene00000387	888.119	-0.329704	0.0844564	-3.90383	9.46819e-05	0.000363414
WBGene00000388	180.009	-0.868728	0.135055	-6.43238	1.2562e-10	1.41899e-09
WBGene00000389	1.38422	1.67218	1.08645	1.53913	0.123773	0.192803
WBGene00000390	1560.87	0.071413	0.0750498	0.951542	0.341329	0.438567
WBGene00000391	8.78052	0.761208	0.436369	1.74442	0.0810866	0.135767
WBGene00000392	126.805	-1.27519	0.170355	-7.48549	7.1283e-14	1.19024e-12
WBGene00000393	171.577	0.698197	0.154505	4.51893	6.21535e-06	3.06827e-05
WBGene00000395	510.888	0.837675	0.18565	4.51213	6.41812e-06	3.1507e-05
WBGene00000396	3440.15	0.0132884	0.119272	0.111413	0.911289	0.935093
WBGene00000397	132.913	1.72148	0.52522	3.27763	0.00104682	0.00308904
WBGene00000399	5.37007	-0.522015	0.699957	-0.745781	0.4558	0.551276
WBGene00000401	22.7422	1.94538	0.44373	4.38414	1.16443e-05	5.41563e-05
WBGene00000402	9.4668	-1.38496	0.48523	-2.85424	0.00431404	0.0107738
WBGene00000403	815.304	1.23428	0.161786	7.62908	2.36431e-14	4.19873e-13
WBGene00000405	1464.54	-0.75204	0.135312	-5.55782	2.73165e-08	2.07038e-07
WBGene00000406	83.9159	-0.516515	0.144319	-3.57897	0.000344945	0.00115259
WBGene00000407	117.218	-0.372943	0.154709	-2.41061	0.015926	0.0337485
WBGene00000408	325.814	-0.469478	0.098759	-4.75378	1.99652e-06	1.08681e-05
WBGene00000409	119.138	-0.446928	0.160035	-2.79268	0.00522727	0.0127611
WBGene00000410	212.872	-0.136883	0.123816	-1.10553	0.268929	0.361869
WBGene00000411	1386.92	-0.49163	0.0889602	-5.5264	3.26866e-08	2.43751e-07
WBGene00000412	17.7308	2.59619	0.423086	6.1363	8.44638e-10	8.46514e-09
WBGene00000413	974.761	-0.580681	0.106005	-5.47785	4.30532e-08	3.16233e-07
WBGene00000414	439.883	0.630075	0.18077	3.4855	0.000491213	0.00157724
WBGene00000415	1373.32	0.186241	0.123393	1.50934	0.131212	0.202189
WBGene00000416	491.38	-0.33347	0.107595	-3.09932	0.00193967	0.00535472
WBGene00000417	2452.76	-0.718945	0.162535	-4.42333	9.71907e-06	4.60296e-05
WBGene00000418	502.379	-0.643396	0.141367	-4.55123	5.33336e-06	2.66199e-05
WBGene00000419	1905.51	-0.40387	0.139097	-2.90351	0.00369006	0.00940362
WBGene00000420	221.146	0.0454276	0.114165	0.397912	0.690695	0.759817
WBGene00000421	2550.7	-0.343587	0.119801	-2.86798	0.00413104	0.0103756
WBGene00000422	22.7612	-0.6663	0.307704	-2.16539	0.0303578	0.059048
WBGene00000423	379.05	-0.469457	0.1152	-4.07515	4.5984e-05	0.000187313
WBGene00000424	607.027	0.0405382	0.0901107	0.449871	0.652803	0.728469
WBGene00000425	220.106	0.498632	0.222769	2.23834	0.025199	0.0502182
WBGene00000426	1389.26	-0.236255	0.145133	-1.62785	0.103557	0.166574
WBGene00000427	0.101594	-0.677547	3.11654	-0.217404	0.827894	NA
WBGene00000428	1.4938	0.951284	0.956628	0.994414	0.320021	0.416511
WBGene00000429	1.86317	0.947725	0.905803	1.04628	0.295431	0.39022
WBGene00000430	1.96904	1.16852	1.13761	1.02717	0.30434	0.399439
WBGene00000431	20.2808	1.03788	0.441021	2.35336	0.0186046	0.0386262
WBGene00000432	0.116089	-0.196653	3.11654	-0.0630998	0.949687	NA
WBGene00000433	1.77718	0.880857	1.1325	0.777795	0.43669	0.533146
WBGene00000434	3.48326	1.20197	0.627416	1.91575	0.0553975	0.0985585
WBGene00000435	5.60073	0.401808	0.569086	0.706059	0.480152	0.574335
WBGene00000436	0.116439	0.765132	3.11654	0.245507	0.806064	NA
WBGene00000437	97.3358	0.0294177	0.206092	0.142741	0.886495	0.916329
WBGene00000438	5.52245	0.934195	0.484131	1.92963	0.0536522	0.0959189
WBGene00000439	5.8561	-0.0633013	0.550303	-0.11503	0.908421	0.932857
WBGene00000440	1.80518	0.998499	1.0337	0.965948	0.33407	0.43135
WBGene00000441	76.621	0.982479	0.174288	5.63711	1.72925e-08	1.35741e-07
WBGene00000442	3.87937	1.46561	0.693673	2.11283	0.0346153	0.0661233
WBGene00000443	86.1177	1.03455	0.322257	3.21034	0.00132576	0.00381929
WBGene00000444	197.245	-0.666379	0.133824	-4.9795	6.3749e-07	3.82385e-06
WBGene00000445	22.909	1.53685	0.478464	3.21205	0.00131789	0.00379788
WBGene00000446	3.1748	0.182772	0.736223	0.248256	0.803936	0.853243
WBGene00000447	2.01722	2.96956	1.10778	2.68063	0.00734827	0.0171772
WBGene00000448	100.59	1.41727	0.370523	3.82506	0.000130741	0.000485322
WBGene00000449	106.299	0.755688	0.257218	2.93793	0.00330415	0.00853636
WBGene00000450	0.287251	0.284243	2.84296	0.0999813	0.920359	NA
WBGene00000451	8.55242	0.797874	0.592493	1.34664	0.178097	0.259872
WBGene00000452	12.0111	1.08949	0.453615	2.4018	0.0163145	0.0344514
WBGene00000453	356.299	0.886988	0.250212	3.54494	0.000392699	0.00129397
WBGene00000454	2.80476	0.28691	0.700461	0.409602	0.682098	0.75257
WBGene00000455	23.376	1.23415	0.411843	2.99666	0.00272951	0.0072377
WBGene00000457	13.8671	-0.514707	0.332888	-1.54618	0.12206	0.190589
WBGene00000458	143.995	1.99677	0.229169	8.71312	2.95621e-18	7.71905e-17
WBGene00000459	1947.39	-0.434424	0.141503	-3.07007	0.00214012	0.00583213
WBGene00000460	336.022	-0.648041	0.133578	-4.85142	1.22582e-06	6.92113e-06
WBGene00000461	17.4525	-1.1915	0.32482	-3.66819	0.00024427	0.000849586
WBGene00000462	126.012	-0.655803	0.140985	-4.65157	3.29419e-06	1.71421e-05
WBGene00000463	54.7051	0.0677753	0.268012	0.252882	0.80036	0.850556
WBGene00000464	899.218	-0.00873928	0.081537	-0.107182	0.914645	0.937825
WBGene00000465	12864.6	-0.965043	0.12184	-7.92055	2.36455e-15	4.65477e-14
WBGene00000466	320.891	-0.640462	0.128311	-4.99147	5.99229e-07	3.61406e-06
WBGene00000467	304.163	-0.784187	0.137249	-5.7136	1.10609e-08	9.02421e-08
WBGene00000468	6.85068	0.614965	0.66128	0.929961	0.352391	0.449564
WBGene00000469	52.7108	0.576472	0.640764	0.899663	0.368299	0.465372
WBGene00000472	6049.25	0.0622038	0.144299	0.431075	0.666414	0.73995
WBGene00000473	8357.42	-1.01618	0.13149	-7.72825	1.09039e-14	2.02852e-13
WBGene00000474	9696.03	-0.99762	0.111798	-8.92343	4.52079e-19	1.26489e-17
WBGene00000475	1075.9	-0.147343	0.20266	-0.727046	0.467198	0.561972
WBGene00000476	65.323	1.7284	0.337597	5.11972	3.05988e-07	1.95537e-06
WBGene00000477	20.7856	1.01638	0.275879	3.68417	0.000229451	0.000804564
WBGene00000478	249.305	0.696043	0.25855	2.6921	0.00710043	0.0166845
WBGene00000479	21169.6	-0.592264	0.147668	-4.01078	6.05185e-05	0.000240367
WBGene00000480	3438.74	1.85968	0.119435	15.5707	1.1522e-54	1.77874e-52
WBGene00000481	13.1908	1.52617	0.429542	3.55301	0.000380855	0.00126085
WBGene00000482	1146.97	0.078071	0.100874	0.773942	0.438965	0.535219
WBGene00000483	0.306986	-1.19516	2.86904	-0.41657	0.676993	NA
WBGene00000484	9.33237	2.20998	0.659184	3.35261	0.000800542	0.00243035
WBGene00000485	90.9594	1.4684	0.307938	4.7685	1.85602e-06	1.01694e-05
WBGene00000487	0.922021	1.99461	1.22167	1.6327	0.102533	0.165124
WBGene00000488	12.9169	2.00208	0.491437	4.07394	4.62244e-05	0.000188224
WBGene00000490	22.9696	1.87856	0.501318	3.74724	0.000178789	0.000644643
WBGene00000491	9.72609	1.61904	0.550805	2.93941	0.00328838	0.00850312
WBGene00000492	9.99011	1.67469	0.600707	2.78786	0.00530578	0.0129294
WBGene00000493	29.1148	0.875279	0.421775	2.07523	0.0379656	0.0716676
WBGene00000496	6806.46	-0.699431	0.151894	-4.60472	4.13025e-06	2.10507e-05
WBGene00000497	215.43	1.49122	0.270446	5.51393	3.50906e-08	2.60612e-07
WBGene00000498	543.707	-0.0516981	0.102293	-0.505394	0.613282	0.695166
WBGene00000499	22.11	-0.2509	0.31828	-0.788299	0.430522	0.527042
WBGene00000500	439.023	-0.404351	0.12807	-3.15725	0.00159262	0.00449969
WBGene00000501	22.6466	1.26435	0.332195	3.80604	0.00014121	0.000520433
WBGene00000502	515.572	-0.665175	0.160471	-4.14514	3.39608e-05	0.000142712
WBGene00000503	669.466	-0.481272	0.20176	-2.38536	0.0170622	0.0358284
WBGene00000506	78.0754	-0.362366	0.151199	-2.39661	0.0165474	0.0348514
WBGene00000507	165.727	-0.850014	0.158931	-5.34831	8.87815e-08	6.20026e-07
WBGene00000508	533.734	0.117288	0.124913	0.938954	0.347754	0.444809
WBGene00000509	332.307	-0.4801	0.113005	-4.2485	2.15211e-05	9.44043e-05
WBGene00000510	15.5711	1.04993	0.329479	3.18663	0.00143942	0.0041104
WBGene00000511	12.0568	1.29453	0.35868	3.60913	0.000307221	0.00103997
WBGene00000512	32.6958	-0.324177	0.216612	-1.49658	0.134502	0.206356
WBGene00000513	0.472851	0.184408	2.2168	0.0831866	0.933703	NA
WBGene00000514	44.5046	-0.315105	0.255972	-1.23101	0.218318	0.306859
WBGene00000515	57.5586	-0.976311	0.20445	-4.77531	1.79428e-06	9.84952e-06
WBGene00000516	212.858	1.52145	0.3388	4.4907	7.09884e-06	3.45786e-05
WBGene00000517	413.318	-0.39682	0.131545	-3.01661	0.0025562	0.00682754
WBGene00000518	36.329	1.55032	0.257228	6.02702	1.67007e-09	1.58189e-08
WBGene00000519	226.686	-0.229496	0.102232	-2.24487	0.0247767	0.0494887
WBGene00000520	272.019	-0.285068	0.101783	-2.80073	0.00509865	0.01248
WBGene00000521	32.5871	1.65797	0.558913	2.96642	0.00301284	0.00788094
WBGene00000522	102.016	4.36164	0.34925	12.4886	8.61739e-36	6.37217e-34
WBGene00000523	23.72	0.634809	0.353942	1.79354	0.0728868	0.124356
WBGene00000524	4.53317	0.787555	0.588579	1.33806	0.180876	0.263165
WBGene00000525	0.16419	-1.18482	3.11429	-0.380447	0.703614	NA
WBGene00000526	17.2249	0.973251	0.450296	2.16136	0.0306678	0.0595458
WBGene00000527	288.017	0.531335	0.0936984	5.67069	1.4222e-08	1.13615e-07
WBGene00000528	441.986	1.03374	0.121479	8.50968	1.74417e-17	4.23972e-16
WBGene00000529	23.2783	1.6206	0.286403	5.65847	1.52731e-08	1.21351e-07
WBGene00000530	264.773	-0.531786	0.180427	-2.94738	0.00320484	0.00831642
WBGene00000531	10.6276	1.11037	0.416442	2.66632	0.00766866	0.017826
WBGene00000532	1633.92	-0.467078	0.176389	-2.64801	0.00809681	0.0186953
WBGene00000533	468.025	-0.173795	0.114887	-1.51275	0.130343	0.201093
WBGene00000534	432.734	0.0071971	0.203047	0.0354455	0.971725	0.979741
WBGene00000535	183.995	-1.85112	0.299829	-6.17394	6.66106e-10	6.79977e-09
WBGene00000536	156.318	-0.140292	0.153045	-0.916671	0.359315	0.45651
WBGene00000537	720.497	-0.26938	0.13456	-2.00193	0.0452922	0.0832323
WBGene00000539	42.3902	0.220111	0.215757	1.02018	0.307644	0.403114
WBGene00000540	73.0566	-0.0739959	0.148431	-0.498522	0.618116	0.699204
WBGene00000541	42.0307	1.4552	0.245933	5.91708	3.27713e-09	2.93507e-08
WBGene00000542	1090.53	-0.019863	0.133962	-0.148274	0.882127	0.912618
WBGene00000543	717.909	-0.230019	0.145679	-1.57895	0.114349	0.180713
WBGene00000544	5.10366	-0.137948	0.495946	-0.278151	0.780896	0.834882
WBGene00000545	138.896	0.579594	0.153317	3.78037	0.000156595	0.00057153
WBGene00000546	7.2095	1.71597	0.525144	3.26762	0.00108456	0.00318809
WBGene00000547	470.163	-0.139385	0.098762	-1.41133	0.158149	0.235943
WBGene00000548	2540.03	-0.320872	0.119602	-2.68284	0.0072999	0.0170831
WBGene00000549	898.981	-0.117058	0.108534	-1.07854	0.280791	0.374509
WBGene00000550	4890.75	-0.835421	0.161635	-5.16857	2.35896e-07	1.53875e-06
WBGene00000551	0	NA	NA	NA	NA	NA
WBGene00000552	3382.89	0.183653	0.0867628	2.11673	0.0342828	0.0655523
WBGene00000553	26.6482	2.11098	0.392352	5.38034	7.43464e-08	5.26316e-07
WBGene00000554	190.264	1.27666	0.184739	6.91061	4.8258e-12	6.54813e-11
WBGene00000555	0.161247	0.765132	3.11654	0.245507	0.806064	NA
WBGene00000556	7.01902	-4.94239	0.924364	-5.3468	8.95226e-08	6.24459e-07
WBGene00000557	7.4628	-2.20305	0.500214	-4.40422	1.06164e-05	4.99301e-05
WBGene00000558	6.11712	-1.63105	0.54061	-3.01706	0.0025524	0.00682173
WBGene00000559	0.0973266	-0.677547	3.11654	-0.217404	0.827894	NA
WBGene00000560	1.33363	-0.177141	1.18399	-0.149614	0.881069	0.911899
WBGene00000561	17.2939	0.159388	0.382714	0.416468	0.677068	0.74871
WBGene00000562	64.3512	2.25305	0.31802	7.08462	1.39428e-12	2.01959e-11
WBGene00000563	1.83626	1.6322	0.984361	1.65813	0.0972911	0.157896
WBGene00000564	778.39	-0.297361	0.148265	-2.0056	0.0448985	0.0826364
WBGene00000565	326.775	0.278414	0.115309	2.4145	0.0157567	0.0334341
WBGene00000566	996.617	0.195685	0.100358	1.94987	0.0511919	0.0923079
WBGene00000567	1990.96	-0.0275707	0.0735389	-0.374913	0.707725	0.773955
WBGene00000583	15.5889	0.806763	0.342527	2.35533	0.0185063	0.0384661
WBGene00000584	21.1072	1.26636	0.346404	3.65572	0.00025646	0.000886726
WBGene00000585	697.487	-0.508993	0.09967	-5.10678	3.27694e-07	2.08198e-06
WBGene00000591	450.382	0.196258	0.126821	1.54752	0.121737	0.190203
WBGene00000592	303.985	-0.137929	0.123814	-1.11401	0.265276	0.358131
WBGene00000593	0.456983	-0.531655	2.66903	-0.199194	0.842111	NA
WBGene00000594	791.457	1.57715	0.678347	2.325	0.0200722	0.0411616
WBGene00000596	5.41561	0.166755	0.519953	0.320711	0.748429	0.807777
WBGene00000597	980.725	-4.00331	0.340077	-11.7717	5.45808e-32	3.32377e-30
WBGene00000598	1.0284	2.06381	1.76212	1.17121	0.241515	0.332532
WBGene00000599	621.472	1.45299	0.575948	2.52279	0.0116429	0.0256257
WBGene00000601	48.7356	2.12119	0.446912	4.74633	2.07138e-06	1.1234e-05
WBGene00000602	38.6469	1.83149	0.326771	5.60481	2.08479e-08	1.6156e-07
WBGene00000603	154.502	2.866	0.771234	3.71612	0.000202309	0.000719135
WBGene00000606	8.59564	-1.75235	0.659895	-2.65549	0.00791926	0.0183407
WBGene00000608	1746.39	-2.87441	0.334578	-8.59117	8.60894e-18	2.15211e-16
WBGene00000609	5870.48	-2.08901	0.276559	-7.55358	4.23459e-14	7.22838e-13
WBGene00000610	6.85027	2.58774	0.58194	4.44676	8.71766e-06	4.15778e-05
WBGene00000611	59.3555	1.4543	0.204812	7.10065	1.24171e-12	1.81051e-11
WBGene00000612	1.91055	0.552739	0.793208	0.696839	0.485903	0.579757
WBGene00000613	0.815733	1.81289	1.40905	1.2866	0.198233	0.283634
WBGene00000614	0.0582197	0.284238	3.11654	0.0912031	0.927331	NA
WBGene00000615	30.7557	0.314846	0.246495	1.27729	0.2015	0.287631
WBGene00000616	24.1501	2.0943	0.596449	3.51128	0.00044596	0.00144966
WBGene00000617	0.139387	-1.14009	3.11482	-0.366022	0.714349	NA
WBGene00000618	0.959621	-2.92785	1.64009	-1.78518	0.0742327	0.126102
WBGene00000620	9.8567	-5.3845	0.935891	-5.75334	8.74992e-09	7.27053e-08
WBGene00000621	0.353117	1.96487	2.21904	0.885459	0.375909	NA
WBGene00000622	0.379806	-0.620088	2.27656	-0.272379	0.78533	NA
WBGene00000623	0.318106	-1.89199	2.28529	-0.827902	0.407726	NA
WBGene00000624	0.0824985	0.284238	3.11654	0.0912031	0.927331	NA
WBGene00000625	58.6038	2.46048	0.639373	3.84827	0.000118955	0.000445423
WBGene00000626	2.58267	1.53575	0.952396	1.61251	0.10685	0.170904
WBGene00000627	0	NA	NA	NA	NA	NA
WBGene00000628	0.506476	0.977847	1.88678	0.518263	0.604275	NA
WBGene00000629	0.0564648	-0.677547	3.11654	-0.217404	0.827894	NA
WBGene00000630	4.83099	0.338301	0.50541	0.669359	0.503267	0.595949
WBGene00000631	11.5281	2.58796	0.62815	4.11997	3.78919e-05	0.000157056
WBGene00000632	0.211142	0.765132	3.09135	0.247508	0.804515	NA
WBGene00000633	2.55003	1.59687	1.00667	1.58629	0.112673	0.178514
WBGene00000634	29.029	3.12237	1.05657	2.95519	0.00312479	0.00813871
WBGene00000636	3.90431	0.910201	0.735392	1.23771	0.215824	0.304301
WBGene00000637	3.17427	2.01939	1.01295	1.99358	0.0461981	0.0846477
WBGene00000638	5.552	-0.497204	0.497425	-0.999557	0.317525	0.413966
WBGene00000639	8.59308	0.675727	0.432386	1.56279	0.118103	0.18558
WBGene00000640	3.6568	0.758666	0.656962	1.15481	0.248168	0.339567
WBGene00000641	74.8568	2.58008	0.997007	2.58783	0.00965833	0.0217752
WBGene00000642	0.0596239	0.284238	3.11654	0.0912031	0.927331	NA
WBGene00000644	25.9744	-0.665805	0.248826	-2.67579	0.0074554	0.01739
WBGene00000645	9.17918	2.85191	0.624192	4.56897	4.90137e-06	2.46173e-05
WBGene00000646	2.20007	-3.62656	1.05218	-3.44671	0.000567452	0.00179228
WBGene00000647	5.06293	0.60758	0.635998	0.955317	0.339417	0.436684
WBGene00000648	0.0824985	0.284238	3.11654	0.0912031	0.927331	NA
WBGene00000649	14.7946	0.924915	0.587381	1.57464	0.115339	0.181984
WBGene00000650	463.067	3.05268	0.897802	3.40017	0.000673447	0.00208772
WBGene00000651	0.759834	1.57581	1.31678	1.19671	0.23142	0.321056
WBGene00000652	165.043	1.42951	0.389421	3.67086	0.000241739	0.00084195
WBGene00000653	71.0356	2.52388	0.811333	3.11078	0.00186593	0.00517875
WBGene00000654	0.481494	2.1999	2.13724	1.02932	0.303331	NA
WBGene00000655	0.820068	0.539671	1.58012	0.341539	0.732698	0.794795
WBGene00000656	846.809	-4.82531	0.549485	-8.78152	1.61286e-18	4.30725e-17
WBGene00000657	21.1177	-0.00216511	0.649832	-0.0033318	0.997342	0.998136
WBGene00000658	1.87109	0.340402	0.844941	0.402871	0.687043	0.75665
WBGene00000659	1.14894	-0.235148	1.01587	-0.231474	0.816947	0.864029
WBGene00000660	1.16609	-0.391113	1.28139	-0.305225	0.760194	0.817517
WBGene00000661	4.44924	0.72734	0.560737	1.29711	0.194592	0.279562
WBGene00000662	0.6739	1.29685	2.11751	0.61244	0.540247	0.6307
WBGene00000663	0.914566	0.982052	1.33703	0.734501	0.462643	0.55779
WBGene00000664	11.8669	1.81581	0.422357	4.29922	1.71404e-05	7.69327e-05
WBGene00000665	7.8385	-2.51546	0.672731	-3.73918	0.000184621	0.000662685
WBGene00000666	17.1825	2.17187	0.581712	3.73358	0.000188777	0.000676498
WBGene00000667	234.667	-1.67369	0.334562	-5.00263	5.65535e-07	3.4332e-06
WBGene00000668	1367.27	-5.00344	0.551283	-9.07599	1.12648e-19	3.34316e-18
WBGene00000669	467.356	-2.43868	0.455383	-5.35523	8.54484e-08	5.98649e-07
WBGene00000670	2749.32	-2.85724	0.228755	-12.4904	8.4262e-36	6.25707e-34
WBGene00000671	39.1188	-2.29556	0.300804	-7.6314	2.3221e-14	4.12795e-13
WBGene00000672	71.9321	2.64261	0.7823	3.378	0.000730142	0.00223513
WBGene00000673	230.807	-3.64572	0.347932	-10.4782	1.08739e-25	4.93222e-24
WBGene00000674	42.6447	1.00163	0.342862	2.92137	0.00348495	0.00893786
WBGene00000675	8687.4	-5.6614	0.434556	-13.028	8.47671e-39	7.13787e-37
WBGene00000676	0.0596239	0.284238	3.11654	0.0912031	0.927331	NA
WBGene00000677	198.311	-3.4497	0.348735	-9.89205	4.50691e-23	1.73181e-21
WBGene00000678	96.0077	2.69972	0.720249	3.74832	0.000178021	0.000642268
WBGene00000679	5.89575	2.92411	0.754035	3.87795	0.000105339	0.000399798
WBGene00000680	2937.92	-2.64987	0.254794	-10.4	2.4787e-25	1.09056e-23
WBGene00000681	59.9278	1.96277	0.955984	2.05314	0.0400585	0.0749755
WBGene00000682	0.217476	-0.660351	2.55621	-0.258332	0.796151	NA
WBGene00000683	41.3978	2.42983	0.833862	2.91394	0.00356896	0.0091307
WBGene00000684	1.15913	1.46587	1.29566	1.13137	0.257898	0.350455
WBGene00000685	6.43744	0.436104	0.604667	0.721229	0.470769	0.56561
WBGene00000687	17.3485	2.86124	0.431432	6.63196	3.31257e-11	4.02888e-10
WBGene00000688	0.122254	-0.677547	3.11654	-0.217404	0.827894	NA
WBGene00000689	24.0471	3.05353	0.816459	3.73997	0.00018404	0.000661066
WBGene00000690	11.3387	-0.286897	0.423311	-0.677746	0.497933	0.590786
WBGene00000691	129.102	1.47593	0.727525	2.0287	0.0424889	0.0789062
WBGene00000692	130.125	0.0543203	0.176821	0.307205	0.758687	0.816358
WBGene00000693	9459.99	-2.45212	0.286159	-8.5691	1.04295e-17	2.58157e-16
WBGene00000694	5.80393	0.265852	0.615613	0.43185	0.66585	0.739507
WBGene00000695	193.04	1.92357	0.772749	2.48926	0.0128011	0.0278992
WBGene00000696	3909.75	-3.04094	0.316268	-9.61506	6.90722e-22	2.43607e-20
WBGene00000697	0.283472	-0.700493	2.38938	-0.293169	0.769393	NA
WBGene00000698	551.843	-3.28903	0.540974	-6.07983	1.2031e-09	1.17499e-08
WBGene00000699	248.669	2.74275	0.751484	3.64977	0.000262471	0.000904489
WBGene00000700	10.6951	1.11228	0.428247	2.59728	0.00939645	0.021261
WBGene00000701	1.74402	1.65195	0.986647	1.67431	0.0940702	0.153761
WBGene00000702	0.831398	-1.72084	1.60134	-1.07462	0.282544	0.376363
WBGene00000703	52.6173	-0.369992	0.687697	-0.538016	0.590566	0.675728
WBGene00000704	50.9516	2.53251	0.73747	3.43405	0.000594645	0.00186545
WBGene00000705	3.99917	2.12531	0.748077	2.84103	0.00449677	0.0111652
WBGene00000706	0.115882	-0.196653	3.11654	-0.0630998	0.949687	NA
WBGene00000707	4.76157	-0.375532	0.647274	-0.580175	0.561797	0.650593
WBGene00000708	55.2097	1.40146	0.33435	4.19159	2.77009e-05	0.000118385
WBGene00000709	0.759457	0.264921	1.47197	0.179977	0.857171	0.894449
WBGene00000710	0.910107	0.68131	1.31228	0.519179	0.603636	0.686975
WBGene00000711	4.12623	1.72865	0.738608	2.34041	0.0192623	0.0397791
WBGene00000712	26.8359	1.0165	0.586236	1.73395	0.0829276	0.138388
WBGene00000713	3683	-2.34663	0.293298	-8.00086	1.23558e-15	2.49942e-14
WBGene00000714	1.58179	-1.01942	1.3775	-0.740048	0.459271	0.554369
WBGene00000715	106.551	-0.823799	0.345792	-2.38235	0.0172025	0.0360841
WBGene00000716	4480.94	-4.07352	0.329492	-12.363	4.14358e-35	2.96434e-33
WBGene00000717	610.59	1.50776	0.550072	2.74102	0.00612486	0.0146416
WBGene00000718	15.8526	3.56923	0.753015	4.73992	2.13799e-06	1.15667e-05
WBGene00000719	12.7088	1.41239	0.69083	2.04448	0.0409057	0.0763495
WBGene00000720	64.4183	0.602406	0.664617	0.906395	0.364727	0.461952
WBGene00000721	0.489264	0.407199	1.92242	0.211816	0.832251	NA
WBGene00000722	21.7326	-1.30098	0.407852	-3.18983	0.00142355	0.00406971
WBGene00000723	10.4593	-1.22345	0.47605	-2.57001	0.0101697	0.022756
WBGene00000724	0.729031	0.683342	1.67741	0.407378	0.68373	0.753898
WBGene00000725	0.61337	0.318553	1.43954	0.221288	0.824868	0.869793
WBGene00000726	17.3978	-0.220589	0.285843	-0.771715	0.440283	0.536384
WBGene00000727	68.1719	-0.316461	0.221426	-1.4292	0.152947	0.229453
WBGene00000728	46.8281	-0.65317	0.279382	-2.33791	0.0193918	0.0400184
WBGene00000729	1.59076	3.56474	1.29413	2.75454	0.00587743	0.0141326
WBGene00000730	5.73884	1.93531	0.762088	2.53948	0.0111017	0.0245635
WBGene00000731	13.1883	-4.88909	0.714863	-6.8392	7.96359e-12	1.05298e-10
WBGene00000732	71.0038	-2.54336	0.466009	-5.45775	4.82194e-08	3.5183e-07
WBGene00000733	2083.19	-3.55225	0.458753	-7.74326	9.69008e-15	1.81421e-13
WBGene00000734	4.53643	0.754177	0.583063	1.29347	0.195847	0.280906
WBGene00000735	9.36217	0.133318	0.456469	0.292063	0.770238	0.825845
WBGene00000736	1.32917	0.945615	1.0367	0.91214	0.361695	0.458938
WBGene00000737	0.0596239	0.284238	3.11654	0.0912031	0.927331	NA
WBGene00000738	316.871	2.67523	0.959299	2.78874	0.00529135	0.0128996
WBGene00000739	202.079	0.83361	0.478773	1.74114	0.0816594	0.136544
WBGene00000740	204.759	1.97133	0.668367	2.94947	0.0031832	0.00826635
WBGene00000741	74.3762	1.41393	0.68935	2.0511	0.0402573	0.0752991
WBGene00000742	43.8453	1.86479	0.715097	2.60774	0.0091143	0.0207025
WBGene00000743	35.4735	1.26265	0.533353	2.36738	0.0179144	0.0374081
WBGene00000744	0	NA	NA	NA	NA	NA
WBGene00000745	10.9454	2.52098	0.504761	4.99441	5.90149e-07	3.56688e-06
WBGene00000746	1.04972	0.360595	1.31118	0.275016	0.783304	0.837151
WBGene00000747	13.6325	1.8528	0.47051	3.93786	8.22112e-05	0.000318406
WBGene00000748	2.7001	2.42298	0.952525	2.54375	0.010967	0.0243083
WBGene00000749	8.0351	-0.384755	0.421287	-0.913287	0.361092	0.458371
WBGene00000750	3.19583	2.25295	0.751727	2.99702	0.00272629	0.00723026
WBGene00000751	3505.25	-2.71223	0.31577	-8.58927	8.75208e-18	2.1817e-16
WBGene00000752	787.811	-2.89836	0.351605	-8.24322	1.67638e-16	3.71568e-15
WBGene00000753	21.351	2.59296	0.635833	4.07804	4.5416e-05	0.000185103
WBGene00000754	5276.65	-2.62043	0.284507	-9.21041	3.2489e-20	1.00488e-18
WBGene00000755	3.63382	3.07159	0.909247	3.37817	0.000729688	0.00223413
WBGene00000756	0.137733	-1.14009	3.11482	-0.366022	0.714349	NA
WBGene00000757	2116.29	-2.57913	0.297013	-8.68358	3.83506e-18	9.86743e-17
WBGene00000758	0	NA	NA	NA	NA	NA
WBGene00000759	6.31172	2.0311	0.523916	3.87676	0.000105856	0.000401154
WBGene00000760	1.82333	0.220888	0.91679	0.240936	0.809605	0.857759
WBGene00000761	151.793	-0.369478	0.213776	-1.72834	0.0839268	0.139844
WBGene00000762	89.6611	0.324666	0.156348	2.07657	0.0378415	0.0714716
WBGene00000763	57.1365	0.0856564	0.179628	0.476855	0.633465	0.712128
WBGene00000764	28.2907	0.0736845	0.287631	0.256177	0.797814	0.848947
WBGene00000765	452.31	-0.783754	0.110062	-7.12101	1.07141e-12	1.57789e-11
WBGene00000766	252.986	-0.0342896	0.118128	-0.290274	0.771606	0.826909
WBGene00000767	775.687	-0.58731	0.137595	-4.26838	1.96894e-05	8.71731e-05
WBGene00000768	62.9143	0.702324	0.209761	3.34821	0.000813343	0.00246284
WBGene00000770	590.965	-0.489889	0.120743	-4.0573	4.96441e-05	0.000200709
WBGene00000771	3.83894	1.27569	0.725455	1.75846	0.0786686	0.132449
WBGene00000772	2151.85	-0.426792	0.142276	-2.99974	0.00270212	0.0071759
WBGene00000773	153.103	-0.398572	0.116148	-3.43159	0.000600044	0.00188037
WBGene00000774	9.01766	-0.422821	0.494485	-0.855072	0.392511	0.489568
WBGene00000775	39.954	-0.382806	0.218991	-1.74805	0.0804559	0.134862
WBGene00000776	5567.31	-0.674828	0.0882073	-7.65048	2.00236e-14	3.60322e-13
WBGene00000777	1105.35	-0.138188	0.131471	-1.05109	0.293216	0.387789
WBGene00000778	23.4221	1.11716	0.501859	2.22604	0.0260113	0.051644
WBGene00000779	255.312	-0.702322	0.155014	-4.5307	5.87899e-06	2.91121e-05
WBGene00000780	13.9362	0.726632	0.384214	1.89122	0.0585955	0.103308
WBGene00000781	1243.35	-1.37111	0.571257	-2.40017	0.0163873	0.0345712
WBGene00000782	1.59573	1.18554	1.00713	1.17716	0.239133	0.329923
WBGene00000783	1424.64	5.62939	0.286267	19.6649	4.31363e-86	1.5493e-83
WBGene00000784	1166.16	0.934831	0.486083	1.92319	0.0544559	0.0971681
WBGene00000785	680.86	-3.25513	0.156899	-20.7466	1.3159e-95	6.09433e-93
WBGene00000786	4264.55	-0.691042	0.126938	-5.44391	5.21224e-08	3.78581e-07
WBGene00000787	77.31	0.598034	0.259175	2.30745	0.0210297	0.0428856
WBGene00000788	1029.66	-1.0131	0.17107	-5.92214	3.1778e-09	2.85192e-08
WBGene00000789	226.011	1.4311	0.21504	6.65506	2.83184e-11	3.47784e-10
WBGene00000792	164.658	0.902658	0.298192	3.0271	0.00246912	0.00662309
WBGene00000793	376.912	0.254904	0.2005	1.27134	0.203606	0.290026
WBGene00000794	544.769	-0.66291	0.119205	-5.56111	2.68063e-08	2.03522e-07
WBGene00000795	908.033	3.5991	0.1318	27.3074	3.46874e-164	4.36045e-161
WBGene00000796	1166.22	-0.438712	0.0864004	-5.07766	3.82106e-07	2.40425e-06
WBGene00000797	81.475	0.0757022	0.152889	0.495146	0.620497	0.701492
WBGene00000798	14.3648	-0.491068	0.30033	-1.63509	0.10203	0.164415
WBGene00000799	37.0802	0.655618	0.264445	2.47922	0.013167	0.0285941
WBGene00000800	1697.02	0.138942	0.119974	1.1581	0.246824	0.338137
WBGene00000801	42.713	-0.0137821	0.200613	-0.0687	0.945228	0.960067
WBGene00000802	3425.31	0.380106	0.219145	1.73449	0.0828304	0.138252
WBGene00000803	307.226	-0.532014	0.150966	-3.52406	0.00042499	0.00138757
WBGene00000804	383.032	-0.661617	0.0992737	-6.66457	2.6544e-11	3.26905e-10
WBGene00000812	604.909	-0.113316	0.138753	-0.816674	0.414115	0.511007
WBGene00000813	731.234	-0.393548	0.074295	-5.2971	1.17655e-07	8.05894e-07
WBGene00000814	1046.35	-0.194372	0.0755729	-2.57198	0.010112	0.0226529
WBGene00000815	771.543	-0.591674	0.12071	-4.90161	9.50535e-07	5.49375e-06
WBGene00000816	636.757	-0.377968	0.100593	-3.75738	0.000171703	0.000621132
WBGene00000817	356.581	-0.373223	0.121664	-3.06764	0.00215754	0.00587597
WBGene00000818	540.129	-0.173411	0.0778775	-2.22672	0.0259662	0.0515745
WBGene00000819	6.41256	-0.643406	0.513488	-1.25301	0.210202	0.297783
WBGene00000820	2.17973	1.03737	0.947009	1.09542	0.273332	0.366408
WBGene00000821	0.815471	0.205099	1.39786	0.146723	0.883351	0.913533
WBGene00000822	369.443	-0.229809	0.156327	-1.47006	0.141547	0.215138
WBGene00000829	12035.3	-0.867214	0.159177	-5.44813	5.0903e-08	3.70182e-07
WBGene00000830	472.108	1.03168	0.184759	5.58395	2.35121e-08	1.80694e-07
WBGene00000831	521.914	1.34053	0.224006	5.98437	2.17224e-09	2.0195e-08
WBGene00000832	193.126	0.677697	0.178827	3.78968	0.000150839	0.000552009
WBGene00000833	6505.4	-0.486402	0.0683299	-7.11843	1.09163e-12	1.60632e-11
WBGene00000834	1114.79	-0.509657	0.151752	-3.3585	0.000783681	0.00238327
WBGene00000835	235.368	-0.429142	0.187953	-2.28324	0.0224164	0.0453507
WBGene00000836	1739.25	-0.458772	0.104402	-4.39429	1.11137e-05	5.19356e-05
WBGene00000837	1609.01	-0.15043	0.0958015	-1.57022	0.116363	0.183239
WBGene00000838	2628.32	-0.143693	0.139172	-1.03248	0.301846	0.396908
WBGene00000839	852.408	-0.199617	0.139456	-1.4314	0.152315	0.22872
WBGene00000840	397.651	-0.44411	0.100798	-4.40595	1.05321e-05	4.95599e-05
WBGene00000841	119.327	2.77306	0.155732	17.8066	6.27934e-71	1.49338e-68
WBGene00000843	276.788	-0.215271	0.174287	-1.23515	0.216775	0.305349
WBGene00000845	27.3368	0.446446	0.247989	1.80027	0.0718186	0.122784
WBGene00000846	1027.67	-0.385872	0.132662	-2.90869	0.00362946	0.00926662
WBGene00000851	0.413931	-0.221959	1.99547	-0.111231	0.911433	NA
WBGene00000853	45.6978	2.40941	0.697079	3.45644	0.000547363	0.00173412
WBGene00000854	173.052	-0.275743	0.130977	-2.10527	0.0352677	0.0672455
WBGene00000857	45.1697	0.529673	0.32266	1.64158	0.100677	0.162626
WBGene00000858	171.39	1.1756	0.27178	4.32554	1.5216e-05	6.90885e-05
WBGene00000859	0	NA	NA	NA	NA	NA
WBGene00000860	0.141915	0.765132	3.11654	0.245507	0.806064	NA
WBGene00000861	0.101594	-0.677547	3.11654	-0.217404	0.827894	NA
WBGene00000862	6.53039	1.41163	0.518634	2.72183	0.00649215	0.0154232
WBGene00000863	1134.66	-0.634133	0.110585	-5.73432	9.79024e-09	8.0551e-08
WBGene00000864	3.59576	-0.997425	0.597042	-1.67061	0.0947985	0.154678
WBGene00000865	4317.99	-0.676902	0.113749	-5.95084	2.66773e-09	2.43071e-08
WBGene00000866	1190.36	-0.91954	0.135474	-6.78758	1.14026e-11	1.47339e-10
WBGene00000867	2213.98	-1.2425	0.135415	-9.17547	4.49595e-20	1.36893e-18
WBGene00000868	8243.67	-0.848183	0.10329	-8.21163	2.18212e-16	4.76466e-15
WBGene00000869	1558.35	-0.407161	0.155149	-2.62433	0.00868189	0.0198638
WBGene00000870	210.001	-0.494028	0.131958	-3.74384	0.000181231	0.000652779
WBGene00000871	3252.69	-0.714993	0.206297	-3.46585	0.00052856	0.00168273
WBGene00000872	570.643	-0.159972	0.0849106	-1.88401	0.0595637	0.104824
WBGene00000874	1167.41	-0.0643702	0.110202	-0.584111	0.559146	0.648116
WBGene00000875	1263.27	-0.484384	0.0844303	-5.73709	9.63176e-09	7.94327e-08
WBGene00000876	397.608	-0.350655	0.0920759	-3.80833	0.000139909	0.000516087
WBGene00000877	704.832	-0.670851	0.121067	-5.54116	3.00482e-08	2.25895e-07
WBGene00000878	12.8574	1.20774	0.366054	3.29934	0.000969137	0.00288495
WBGene00000879	674.138	-0.731501	0.162561	-4.49985	6.80006e-06	3.32244e-05
WBGene00000880	389.326	-0.304511	0.0960922	-3.16895	0.00152993	0.00433929
WBGene00000881	2315.55	0.0443072	0.15582	0.284349	0.776143	0.83086
WBGene00000882	106.02	0.151691	0.294459	0.515153	0.606446	0.689104
WBGene00000883	7637.63	-0.877111	0.118611	-7.39486	1.41561e-13	2.28983e-12
WBGene00000884	188.42	-0.379363	0.118812	-3.19296	0.00140821	0.00403174
WBGene00000885	105.549	-0.804607	0.179866	-4.47338	7.69942e-06	3.71442e-05
WBGene00000886	15.1631	-0.642018	0.34702	-1.85009	0.0643008	0.111744
WBGene00000887	216.221	-0.308993	0.104666	-2.95216	0.00315555	0.00820544
WBGene00000888	492.661	-0.358021	0.173138	-2.06784	0.0386552	0.0727353
WBGene00000889	243.819	-0.210944	0.172074	-1.22589	0.220241	0.308969
WBGene00000890	165.341	-0.307847	0.122777	-2.50736	0.0121638	0.026629
WBGene00000891	402.488	-0.598043	0.0974237	-6.13858	8.32634e-10	8.36388e-09
WBGene00000892	219.708	-0.30771	0.126441	-2.43363	0.0149482	0.0319303
WBGene00000893	58.9357	2.54297	0.724287	3.511	0.000446417	0.00145088
WBGene00000894	3273.86	-0.730072	0.104108	-7.01266	2.33833e-12	3.28429e-11
WBGene00000895	5.28889	0.736031	0.538264	1.36742	0.171495	0.252075
WBGene00000896	172.914	-0.58838	0.225426	-2.61008	0.00905212	0.0205851
WBGene00000897	295.825	-0.0933801	0.108273	-0.862451	0.388439	0.485349
WBGene00000898	2292.01	0.183288	0.127004	1.44317	0.148973	0.224755
WBGene00000899	148.387	0.55263	0.128903	4.28716	1.8097e-05	8.07118e-05
WBGene00000900	294.388	-0.00874135	0.0947856	-0.0922224	0.926521	0.946619
WBGene00000901	502.642	0.289849	0.111141	2.60795	0.00910862	0.0206976
WBGene00000902	24.9559	1.36	0.489994	2.77555	0.0055109	0.0133627
WBGene00000903	24.5962	0.486692	0.297267	1.63722	0.101584	0.163836
WBGene00000904	130.772	0.730284	0.174075	4.19522	2.72604e-05	0.000116786
WBGene00000905	6.60391	0.147273	0.4465	0.329839	0.741522	0.802339
WBGene00000906	22.3076	1.78208	0.418773	4.25548	2.08598e-05	9.18007e-05
WBGene00000907	22.4741	1.52845	0.373616	4.09096	4.29595e-05	0.000175906
WBGene00000908	190.826	0.819796	0.185627	4.41636	1.00375e-05	4.74483e-05
WBGene00000910	70.0488	1.38194	0.245623	5.62626	1.84159e-08	1.44045e-07
WBGene00000911	2568.42	-0.124594	0.126913	-0.98173	0.326233	0.423156
WBGene00000912	2417.37	0.387877	0.170371	2.27666	0.0228065	0.0460078
WBGene00000913	5599.6	-0.884411	0.11704	-7.55649	4.14079e-14	7.07512e-13
WBGene00000914	363.122	0.269019	0.126944	2.11919	0.0340748	0.0652293
WBGene00000915	32253.2	-0.520199	0.14927	-3.48496	0.00049221	0.00157987
WBGene00000917	298.274	-0.211103	0.123683	-1.7068	0.0878585	0.145431
WBGene00000920	11.0624	0.0158094	0.378603	0.0417572	0.966692	0.97627
WBGene00000928	530.936	1.04454	0.679989	1.53611	0.12451	0.193711
WBGene00000929	204.563	-0.346778	0.117083	-2.96181	0.00305836	0.00798815
WBGene00000930	0.810499	1.04005	1.32335	0.785927	0.43191	0.528484
WBGene00000931	3123.32	-0.0389175	0.121986	-0.319033	0.749701	0.808877
WBGene00000932	4.34776	2.42634	0.796713	3.04544	0.00232342	0.0062782
WBGene00000933	332.242	-0.475516	0.121893	-3.9011	9.57559e-05	0.000366908
WBGene00000934	16.2349	0.885382	0.36229	2.44385	0.0145314	0.0311458
WBGene00000935	2438.17	-0.616457	0.116232	-5.30368	1.13494e-07	7.7901e-07
WBGene00000936	37.1983	1.13121	0.211445	5.34991	8.7999e-08	6.1505e-07
WBGene00000937	501.015	-0.26228	0.0953062	-2.75197	0.0059238	0.0142305
WBGene00000938	1568.75	-0.0933253	0.133158	-0.700859	0.483391	0.577268
WBGene00000939	1364.47	-0.601693	0.119322	-5.04261	4.59229e-07	2.83976e-06
WBGene00000940	142.337	-0.533316	0.140473	-3.79659	0.000146703	0.00053844
WBGene00000941	63.1748	-0.660924	0.287171	-2.3015	0.0213633	0.0434852
WBGene00000942	882.018	0.772099	0.182748	4.22494	2.39007e-05	0.000103807
WBGene00000950	28.7024	0.780388	0.241961	3.22527	0.00125854	0.00364355
WBGene00000951	27.5083	2.15164	0.280598	7.66803	1.74656e-14	3.17538e-13
WBGene00000952	1.6268	2.90302	1.16453	2.49286	0.0126718	0.0276586
WBGene00000953	13.7604	1.42841	0.537528	2.65737	0.00787537	0.0182559
WBGene00000955	43.8497	1.9982	0.226744	8.81258	1.22297e-18	3.29602e-17
WBGene00000958	83.9947	1.76113	0.317195	5.55221	2.82087e-08	2.13066e-07
WBGene00000959	239.484	0.892506	0.159648	5.59047	2.26454e-08	1.7472e-07
WBGene00000960	5.71422	2.41203	0.648154	3.72138	0.000198134	0.000706291
WBGene00000961	726.727	0.590968	0.168166	3.51418	0.000441106	0.00143547
WBGene00000962	12850.7	-0.275872	0.191224	-1.44266	0.149116	0.224931
WBGene00000963	105.671	2.44076	0.206833	11.8006	3.87419e-32	2.37568e-30
WBGene00000964	124.303	0.969139	0.182032	5.32401	1.01506e-07	7.02204e-07
WBGene00000965	389.818	-0.413175	0.1164	-3.54962	0.000385785	0.00127501
WBGene00000966	15.8656	0.259066	0.305351	0.848421	0.396203	0.493334
WBGene00000967	130.539	0.493244	0.156869	3.14431	0.00166476	0.00468396
WBGene00000968	29.4398	0.381555	0.278698	1.36907	0.170979	0.251488
WBGene00000969	56.7235	0.622442	0.263565	2.36163	0.0181949	0.0378904
WBGene00000970	1040.3	-0.423372	0.107198	-3.94945	7.83307e-05	0.00030465
WBGene00000971	11.9699	-1.23879	0.358378	-3.45667	0.000546899	0.00173296
WBGene00000972	8.77951	1.07421	0.521491	2.05988	0.0394102	0.0739886
WBGene00000973	111.434	2.33773	0.242102	9.65599	4.63672e-22	1.66195e-20
WBGene00000974	42.1488	-0.239048	0.231212	-1.03389	0.301186	0.396246
WBGene00000975	203.092	-0.202438	0.162426	-1.24634	0.212639	0.300608
WBGene00000976	1039.66	-0.549143	0.180824	-3.03689	0.00239035	0.00643633
WBGene00000977	43.1553	-0.051314	0.200302	-0.256183	0.79781	0.848947
WBGene00000978	8.36057	2.13793	0.500911	4.26808	1.97162e-05	8.72481e-05
WBGene00000979	12.5469	1.35731	0.614876	2.20745	0.0272825	0.0537901
WBGene00000980	56.4047	-0.0973949	0.22757	-0.427977	0.668668	0.742032
WBGene00000981	265.742	1.48731	0.195977	7.58919	3.21913e-14	5.59662e-13
WBGene00000982	156.236	-0.587704	0.113649	-5.17124	2.3255e-07	1.51917e-06
WBGene00000983	37.8901	2.04234	0.430808	4.74071	2.12967e-06	1.15252e-05
WBGene00000984	132.139	1.24637	0.252045	4.94502	7.61375e-07	4.49043e-06
WBGene00000985	1304.25	0.0439043	0.0926201	0.474026	0.635482	0.713926
WBGene00000986	6.02099	-0.0186649	0.581693	-0.0320872	0.974403	0.98136
WBGene00000987	381.883	-0.259212	0.129706	-1.99845	0.0456682	0.0838162
WBGene00000988	446.774	-2.73677	0.354395	-7.72237	1.14184e-14	2.11528e-13
WBGene00000989	3.44082	0.439186	0.639042	0.687257	0.491921	0.585309
WBGene00000990	37.799	-0.176958	0.238263	-0.7427	0.457663	0.55296
WBGene00000991	673.318	1.53506	0.15636	9.81746	9.46957e-23	3.57629e-21
WBGene00000992	46.9592	0.434945	0.21508	2.02224	0.0431511	0.0799301
WBGene00000993	112.844	-0.32587	0.126793	-2.5701	0.010167	0.022753
WBGene00000994	599.029	-0.845808	0.164492	-5.14194	2.71922e-07	1.75745e-06
WBGene00000995	1286.98	-0.413701	0.111322	-3.71626	0.000202193	0.000718867
WBGene00000996	651.227	-0.36591	0.0768273	-4.76275	1.90971e-06	1.04311e-05
WBGene00000998	1463.97	0.7869	0.165889	4.74354	2.10017e-06	1.13761e-05
WBGene00001000	675.012	-0.300749	0.146616	-2.05127	0.0402405	0.0752756
WBGene00001001	975.146	-0.150856	0.129854	-1.16173	0.245345	0.336515
WBGene00001002	619.571	-0.490793	0.091181	-5.38263	7.34046e-08	5.20277e-07
WBGene00001005	2190.79	-0.890615	0.100542	-8.85817	8.13419e-19	2.216e-17
WBGene00001006	2324.44	1.06437	0.227311	4.68242	2.83514e-06	1.49343e-05
WBGene00001007	569.208	-0.196545	0.0928112	-2.11769	0.0342012	0.0654247
WBGene00001008	374.43	1.73872	0.18004	9.65743	4.57175e-22	1.642e-20
WBGene00001016	1161.37	-0.529221	0.111345	-4.753	2.00419e-06	1.09066e-05
WBGene00001017	1755.32	0.0750056	0.0745178	1.00655	0.314153	0.410208
WBGene00001018	340.271	-0.170495	0.11559	-1.475	0.140213	0.213349
WBGene00001019	524.422	-0.144265	0.0872221	-1.65399	0.0981289	0.15908
WBGene00001020	233.288	-0.678963	0.107832	-6.29648	3.04472e-10	3.24555e-09
WBGene00001021	8.28511	-0.119218	0.420443	-0.283553	0.776753	0.831311
WBGene00001022	44.5429	-0.12041	0.194993	-0.617508	0.5369	0.627417
WBGene00001023	3329.92	-0.650925	0.148734	-4.37642	1.20642e-05	5.5991e-05
WBGene00001025	499.33	0.397895	0.127852	3.11216	0.00185726	0.00515632
WBGene00001026	1376.65	-0.296424	0.1197	-2.4764	0.0132715	0.028796
WBGene00001027	578.562	-0.549839	0.104111	-5.28128	1.28285e-07	8.73718e-07
WBGene00001028	274.413	-0.336484	0.146543	-2.29615	0.0216675	0.0440128
WBGene00001029	1482.12	-0.835376	0.123634	-6.75684	1.41031e-11	1.79725e-10
WBGene00001030	3256.6	-0.31554	0.16257	-1.94095	0.0522645	0.0938958
WBGene00001031	1125.16	-0.263016	0.109093	-2.41094	0.0159114	0.0337216
WBGene00001032	270.674	0.444394	0.117764	3.7736	0.000160907	0.000585931
WBGene00001033	56.2943	-0.220581	0.223777	-0.985721	0.32427	0.421013
WBGene00001034	371.711	-0.145552	0.0886622	-1.64165	0.100663	0.162626
WBGene00001035	304.27	-0.545753	0.117338	-4.65111	3.3015e-06	1.7175e-05
WBGene00001036	86.3649	-0.309025	0.167725	-1.84246	0.0654086	0.113367
WBGene00001037	1237.48	-0.336323	0.112861	-2.97997	0.00288276	0.00758981
WBGene00001038	4220.91	0.718366	0.124253	5.78145	7.40575e-09	6.25102e-08
WBGene00001039	79.7061	-0.229508	0.194346	-1.18093	0.237632	0.328187
WBGene00001040	438.42	-0.665687	0.0930114	-7.15705	8.24322e-13	1.23361e-11
WBGene00001041	679.857	-0.55055	0.123594	-4.45451	8.40839e-06	4.02527e-05
WBGene00001042	24.9752	0.862311	0.328566	2.62447	0.0086784	0.0198584
WBGene00001043	243.376	-0.0525086	0.105123	-0.499499	0.617428	0.698628
WBGene00001044	159.524	-0.603218	0.136708	-4.41244	1.02214e-05	4.82139e-05
WBGene00001045	301.79	0.0863953	0.150819	0.572841	0.566752	0.654938
WBGene00001046	154.542	-0.296662	0.134044	-2.21317	0.0268862	0.0531413
WBGene00001047	620.789	-0.108202	0.0901224	-1.20061	0.229902	0.319492
WBGene00001048	100.903	-0.548914	0.149617	-3.66879	0.000243703	0.000848201
WBGene00001049	784.381	-0.511444	0.151572	-3.37427	0.000740124	0.00226215
WBGene00001050	203.94	-0.331746	0.11007	-3.01396	0.0025786	0.00688317
WBGene00001051	2723.24	-1.00286	0.196087	-5.11438	3.14778e-07	2.00716e-06
WBGene00001052	17.2973	1.60567	0.326976	4.91067	9.07655e-07	5.27015e-06
WBGene00001053	21.4995	0.987078	0.263794	3.74185	0.00018267	0.000656994
WBGene00001054	65.4305	1.26023	0.18854	6.68414	2.32279e-11	2.88489e-10
WBGene00001055	152.135	0.338921	0.169551	1.99894	0.0456153	0.083728
WBGene00001056	1813.15	-0.538161	0.138571	-3.88365	0.0001029	0.000391637
WBGene00001057	1086.14	-0.330204	0.147773	-2.23453	0.0254481	0.0506515
WBGene00001058	1939.17	-0.195778	0.121154	-1.61595	0.106105	0.169928
WBGene00001059	34.3232	0.133205	0.28643	0.46505	0.641895	0.718987
WBGene00001060	819.71	-0.568434	0.118853	-4.78265	1.73e-06	9.52337e-06
WBGene00001061	1287.86	-1.06342	0.203673	-5.22122	1.77747e-07	1.1866e-06
WBGene00001062	0	NA	NA	NA	NA	NA
WBGene00001063	73.5851	2.18381	0.420926	5.18813	2.1242e-07	1.40067e-06
WBGene00001064	267.76	1.35584	0.655087	2.06971	0.0384792	0.0724273
WBGene00001065	68.4272	1.31572	0.72629	1.81157	0.0700532	0.120162
WBGene00001066	8.87375	-0.363746	0.677863	-0.536606	0.59154	0.676578
WBGene00001067	9.13378	0.105978	0.684403	0.154847	0.876942	0.908696
WBGene00001068	24.5633	-2.46504	0.376119	-6.55388	5.60599e-11	6.60816e-10
WBGene00001069	139.122	1.45817	0.594517	2.45269	0.0141791	0.0304947
WBGene00001070	8.13119	-1.08691	0.589086	-1.84509	0.0650249	0.112817
WBGene00001071	2.7845	-0.944974	0.753991	-1.2533	0.210098	0.297658
WBGene00001072	484.086	1.38384	0.530862	2.60677	0.00913995	0.0207554
WBGene00001073	1079.68	-0.1497	0.124895	-1.19861	0.23068	0.320295
WBGene00001074	2.16169	0.190481	0.880832	0.216252	0.828792	0.873042
WBGene00001075	802.025	1.78233	0.757491	2.35293	0.018626	0.0386536
WBGene00001076	1014.73	1.8	0.770758	2.33536	0.0195244	0.040226
WBGene00001077	121.828	0.276569	0.222832	1.24116	0.214548	0.302817
WBGene00001078	150.453	-0.644962	0.231332	-2.78804	0.00530285	0.0129241
WBGene00001079	0.822594	-2.1752	1.41517	-1.53706	0.124278	0.193483
WBGene00001080	892.737	0.231083	0.107226	2.15509	0.0311544	0.0604173
WBGene00001081	889.443	0.246195	0.0907165	2.71389	0.00664981	0.0157552
WBGene00001082	496.042	-0.180196	0.105035	-1.71558	0.0862398	0.143155
WBGene00001085	1695.95	-0.333916	0.0823495	-4.05487	5.0163e-05	0.000202528
WBGene00001086	734.723	0.106735	0.107115	0.996454	0.31903	0.415465
WBGene00001087	1683.85	-0.248541	0.119548	-2.079	0.037617	0.0711087
WBGene00001088	292.095	-0.544123	0.266707	-2.04016	0.0413347	0.0770522
WBGene00001089	650.389	1.14913	0.1889	6.08324	1.17779e-09	1.15219e-08
WBGene00001090	660.666	-0.381322	0.166022	-2.29682	0.0216293	0.0439504
WBGene00001091	293.916	1.38084	0.18602	7.42308	1.14426e-13	1.87678e-12
WBGene00001092	106.685	-0.582782	0.211128	-2.76033	0.00577435	0.0139248
WBGene00001093	1617.98	-0.589608	0.135591	-4.34844	1.3711e-05	6.29042e-05
WBGene00001094	3637.09	0.44221	0.166383	2.65778	0.00786582	0.0182409
WBGene00001095	303.625	-0.629192	0.145645	-4.32004	1.56e-05	7.0686e-05
WBGene00001096	1.46895	0.334298	1.4032	0.238239	0.811696	0.859353
WBGene00001099	424.53	0.565287	0.139532	4.05131	5.09313e-05	0.000205206
WBGene00001101	249.546	0.751224	0.165547	4.53783	5.68371e-06	2.82484e-05
WBGene00001102	592.653	-0.53093	0.106619	-4.97971	6.36781e-07	3.8209e-06
WBGene00001103	27.6257	-0.529055	0.237817	-2.22463	0.0261061	0.0517739
WBGene00001104	106.171	-0.933542	0.142289	-6.5609	5.34847e-11	6.32154e-10
WBGene00001105	83.2631	0.60006	0.401364	1.49505	0.134901	0.20686
WBGene00001106	1.0265	1.54993	1.21133	1.27952	0.200713	0.28666
WBGene00001107	0.792983	1.10136	1.78455	0.617162	0.537128	0.6276
WBGene00001108	35.891	1.30124	0.498068	2.61257	0.00898635	0.0204752
WBGene00001109	13.1078	1.4644	0.606323	2.41521	0.0157259	0.0333768
WBGene00001110	578.743	-0.737017	0.180007	-4.09437	4.23313e-05	0.000173697
WBGene00001111	3.25916	0.520542	0.633352	0.821884	0.411143	0.508161
WBGene00001112	759.177	-0.594748	0.136462	-4.35835	1.3105e-05	6.03754e-05
WBGene00001113	52.8715	0.79748	0.243153	3.27975	0.001039	0.0030675
WBGene00001115	138.153	-0.213273	0.182822	-1.16656	0.243387	0.334247
WBGene00001116	73.5815	1.36087	0.253542	5.36743	7.98682e-08	5.62465e-07
WBGene00001117	16.1632	1.27312	0.415627	3.06313	0.00219038	0.00595528
WBGene00001118	39.2967	1.80873	0.397479	4.55049	5.35211e-06	2.67059e-05
WBGene00001119	4.98624	-0.0112748	0.497792	-0.0226496	0.98193	0.986695
WBGene00001121	6.58389	1.92599	0.638055	3.01854	0.00253996	0.00679032
WBGene00001122	20.0096	1.73465	0.373894	4.63942	3.49389e-06	1.80922e-05
WBGene00001123	41.7928	1.40204	0.380195	3.68769	0.000226297	0.000794932
WBGene00001127	5.24645	1.94089	0.722058	2.68799	0.0071883	0.0168569
WBGene00001129	8.11939	2.03898	0.54678	3.72906	0.000192192	0.000687477
WBGene00001130	683.124	0.196797	0.101751	1.9341	0.0531014	0.0950989
WBGene00001131	551.393	0.936117	0.185388	5.04949	4.42981e-07	2.74992e-06
WBGene00001132	651.439	1.98219	0.118266	16.7604	4.75061e-63	8.44506e-61
WBGene00001133	9.83718	2.24725	0.549035	4.09309	4.2566e-05	0.000174579
WBGene00001134	749.891	-0.234145	0.0930347	-2.51675	0.0118443	0.0260007
WBGene00001135	15.8734	0.617855	0.314511	1.96449	0.0494728	0.0896582
WBGene00001136	4.53537	1.14794	0.543971	2.11031	0.034832	0.0664796
WBGene00001137	10084.1	-0.136599	0.102801	-1.32877	0.183923	0.26702
WBGene00001145	255.805	0.810227	0.136394	5.94033	2.84444e-09	2.58171e-08
WBGene00001147	4.28812	1.46737	0.585987	2.50411	0.0122761	0.0268349
WBGene00001148	248.671	-0.0257234	0.104848	-0.245341	0.806192	0.855173
WBGene00001149	1221.08	0.37887	0.114769	3.30115	0.000962881	0.00286778
WBGene00001150	40.4029	1.48551	0.330471	4.49513	6.95288e-06	3.39052e-05
WBGene00001151	145.836	-0.451765	0.14194	-3.18279	0.00145863	0.00415512
WBGene00001152	49.1077	0.562693	0.221533	2.54	0.0110852	0.0245303
WBGene00001153	480.932	-0.556375	0.0895602	-6.2123	5.22151e-10	5.40231e-09
WBGene00001154	169.223	-0.528564	0.149995	-3.52389	0.000425265	0.00138803
WBGene00001155	768.393	-2.25869	0.199934	-11.2972	1.35486e-29	7.47465e-28
WBGene00001156	127.499	-0.457764	0.203951	-2.24448	0.0248017	0.0495273
WBGene00001157	91.2148	1.20888	0.190539	6.3445	2.2315e-10	2.42122e-09
WBGene00001158	53.0252	1.5674	0.760173	2.0619	NA	NA
WBGene00001159	39.291	1.11872	0.316647	3.53303	0.00041083	0.00134691
WBGene00001160	1626.32	0.123915	0.101262	1.22371	0.221063	0.309728
WBGene00001161	154.563	-0.529164	0.138838	-3.81139	0.000138189	0.000510491
WBGene00001162	98.8433	-0.0312923	0.140783	-0.222273	0.824101	0.869141
WBGene00001163	66.4163	0.539157	0.303594	1.77591	0.0757472	0.128316
WBGene00001164	0.575952	0.362999	1.50418	0.241326	0.809302	0.857696
WBGene00001165	193.085	0.32546	0.161753	2.01208	0.0442116	0.0815769
WBGene00001166	4106.24	-0.448918	0.168826	-2.65905	0.00783605	0.0181815
WBGene00001167	48733.3	0.558023	0.111589	5.00068	5.71273e-07	3.46445e-06
WBGene00001168	32640.2	-0.193246	0.146747	-1.31687	0.187883	0.271563
WBGene00001169	4871.7	1.46006	0.163955	8.90521	5.32829e-19	1.4814e-17
WBGene00001170	20.7192	0.149026	0.280601	0.531097	0.595352	0.67979
WBGene00001171	49.3579	1.29685	0.288012	4.50277	6.70723e-06	3.2789e-05
WBGene00001172	1036.19	1.55149	0.131679	11.7824	4.81118e-32	2.94e-30
WBGene00001173	2622.52	-0.114438	0.118886	-0.962581	0.335758	0.433084
WBGene00001174	33.3808	1.36134	0.29574	4.60318	4.16098e-06	2.11767e-05
WBGene00001175	30.3072	-0.34903	0.228883	-1.52492	0.127278	0.197215
WBGene00001177	556.992	1.17181	0.1135	10.3243	5.47153e-25	2.37176e-23
WBGene00001178	281.547	0.210832	0.117915	1.788	0.0737758	0.125466
WBGene00001179	124.073	1.10052	0.176546	6.23362	4.55781e-10	4.74352e-09
WBGene00001182	121.863	1.65162	0.204589	8.07288	6.86591e-16	1.42989e-14
WBGene00001184	151.455	1.5811	0.178979	8.83397	1.01025e-18	2.7353e-17
WBGene00001185	0.580989	0.599404	1.63913	0.365685	0.7146	0.779836
WBGene00001186	586.237	-0.140871	0.121414	-1.16025	0.245947	0.337104
WBGene00001187	572.149	1.04071	0.18835	5.52537	3.28795e-08	2.45085e-07
WBGene00001188	27.7651	1.16236	0.27323	4.25416	2.09833e-05	9.22983e-05
WBGene00001189	1002.84	1.4146	0.133555	10.5919	3.25003e-26	1.5212e-24
WBGene00001190	16.2662	0.963038	0.308935	3.11729	0.00182523	0.00507941
WBGene00001193	120.845	0.258266	0.170584	1.51402	0.130022	0.200724
WBGene00001194	1636.45	-0.0799316	0.0683586	-1.1693	0.242284	0.333277
WBGene00001196	1491.39	0.66697	0.156884	4.25135	2.12484e-05	9.33942e-05
WBGene00001202	10.6328	0.865142	0.36466	2.37246	0.01767	0.0369372
WBGene00001204	4.6262	0.83064	0.754213	1.10133	0.270752	0.363793
WBGene00001207	39.1891	1.68035	0.414343	4.05545	5.00385e-05	0.000202211
WBGene00001208	393.26	1.84708	0.213151	8.66556	4.49282e-18	1.14759e-16
WBGene00001209	3482.92	-0.0989685	0.0924246	-1.0708	0.284258	0.378041
WBGene00001210	63.4322	1.21595	0.806195	1.50826	0.131488	0.202455
WBGene00001211	6.66344	2.26548	0.545203	4.15529	3.24873e-05	0.000136912
WBGene00001214	1475.9	-0.501041	0.152397	-3.28773	0.00101	0.00299092
WBGene00001215	671.046	-0.183747	0.135002	-1.36107	0.173492	0.254483
WBGene00001223	0.280918	0.740522	2.4157	0.306545	0.75919	NA
WBGene00001224	705.554	-0.178186	0.0864312	-2.06159	0.0392466	0.0737062
WBGene00001225	2023.29	0.18454	0.0904527	2.04018	0.0413323	0.0770522
WBGene00001226	4036.28	-0.462072	0.096783	-4.77431	1.80328e-06	9.89275e-06
WBGene00001227	2366.74	-0.0338516	0.0956219	-0.354015	0.723327	0.78725
WBGene00001228	1165.02	-0.291197	0.0789141	-3.69004	0.000224216	0.000788249
WBGene00001229	754.912	-0.273328	0.0956585	-2.85733	0.00427221	0.0106814
WBGene00001230	721.247	-0.0327428	0.0842635	-0.388576	0.697589	0.765487
WBGene00001231	514.42	-0.294234	0.115224	-2.55357	0.0106624	0.0237378
WBGene00001232	634.392	-0.122059	0.0986428	-1.23738	0.215946	0.304425
WBGene00001233	339.296	-0.709553	0.0942749	-7.52642	5.2151e-14	8.77443e-13
WBGene00001234	865.908	0.649328	0.135067	4.80746	1.52856e-06	8.47816e-06
WBGene00001235	151.261	-0.671444	0.14364	-4.67451	2.9466e-06	1.54613e-05
WBGene00001236	150.067	-0.405093	0.149728	-2.70552	0.00681966	0.0161056
WBGene00001237	0.257206	1.54367	2.42979	0.635309	0.525227	NA
WBGene00001239	576.513	-0.204699	0.126492	-1.61827	0.105604	0.169273
WBGene00001240	582.348	0.348821	0.211296	1.65086	0.0987662	0.159921
WBGene00001241	823.005	-0.00239534	0.152718	-0.0156848	0.987486	0.990808
WBGene00001242	17.4754	0.976921	0.506042	1.93051	0.0535431	0.0957627
WBGene00001243	778.974	-0.714779	0.179968	-3.97171	7.13593e-05	0.0002797
WBGene00001244	736.861	-1.23156	0.161504	-7.62554	2.43018e-14	4.31136e-13
WBGene00001245	0.572731	2.5069	1.55506	1.61209	0.106942	0.171032
WBGene00001246	0.818189	1.0353	1.33614	0.774845	0.438431	0.534882
WBGene00001247	42.9281	-0.286225	0.244755	-1.16943	0.242229	0.333254
WBGene00001248	47.7759	1.04697	0.289216	3.62003	0.000294569	0.00100118
WBGene00001249	177.642	-0.092014	0.140894	-0.653073	0.51371	0.605909
WBGene00001250	65.6072	1.62953	0.185047	8.80602	1.29668e-18	3.48933e-17
WBGene00001251	125.258	0.42699	0.231481	1.8446	0.0650954	0.11288
WBGene00001252	4.8408	2.06268	0.612522	3.36751	0.000758497	0.00231315
WBGene00001253	36.2364	1.11776	0.316928	3.52685	0.00042054	0.00137618
WBGene00001258	2285.59	-0.338432	0.173218	-1.95379	0.0507259	0.0915991
WBGene00001259	4557.33	-0.394777	0.112581	-3.5066	0.000453869	0.00147238
WBGene00001262	1957.92	-0.214877	0.14245	-1.50844	0.131443	0.202422
WBGene00001263	3952.26	-0.204697	0.126278	-1.621	0.105017	0.168547
WBGene00001281	929.813	-0.678322	0.111983	-6.05738	1.38358e-09	1.33203e-08
WBGene00001284	1217.13	-0.571295	0.15687	-3.64184	0.000270694	0.000928464
WBGene00001303	1209.39	-0.809884	0.149221	-5.4274	5.71813e-08	4.12601e-07
WBGene00001309	665.42	-0.296492	0.120893	-2.45251	0.0141862	0.0305062
WBGene00001310	3.045	-0.813471	0.620029	-1.31199	0.189524	0.273397
WBGene00001311	4.70126	-0.525538	0.531522	-0.988743	0.322789	0.419345
WBGene00001320	2020.01	-0.539549	0.154102	-3.50124	0.000463098	0.00149762
WBGene00001324	555.838	-0.196632	0.095711	-2.05444	0.0399332	0.074804
WBGene00001325	235.307	0.0644425	0.128609	0.501074	0.616319	0.697755
WBGene00001328	3495.71	-0.25218	0.146622	-1.71993	0.0854444	0.142036
WBGene00001329	1047.85	0.264908	0.0802467	3.30117	0.000962826	0.00286778
WBGene00001330	911.35	2.1544	0.177397	12.1445	6.13328e-34	4.07319e-32
WBGene00001331	326.495	-0.111203	0.0913418	-1.21744	0.223438	0.312384
WBGene00001332	290.809	-0.722517	0.103839	-6.95804	3.4504e-12	4.76637e-11
WBGene00001333	1614.42	0.0103773	0.0697505	0.148777	0.88173	0.912342
WBGene00001334	786.034	-0.123842	0.0777885	-1.59203	0.111377	0.176731
WBGene00001335	89.1487	-0.28815	0.149973	-1.92135	0.0546882	0.0975233
WBGene00001336	1497.29	-0.00221546	0.0991962	-0.0223341	0.982181	0.986892
WBGene00001337	2962.19	0.696723	0.120869	5.76426	8.20148e-09	6.8504e-08
WBGene00001338	201.29	-0.0249112	0.103354	-0.241027	0.809534	0.857745
WBGene00001340	639.64	0.241233	0.0862524	2.79683	0.0051607	0.0126161
WBGene00001345	139.695	2.14894	0.167374	12.8391	9.89844e-38	8.06494e-36
WBGene00001352	1632.65	-0.394141	0.147842	-2.66597	0.00767666	0.0178399
WBGene00001358	90.208	-0.119659	0.136818	-0.874583	0.381801	0.478515
WBGene00001365	337.357	-0.0294426	0.132819	-0.221674	0.824567	0.869581
WBGene00001366	232.417	1.817	0.20376	8.91734	4.77642e-19	1.33217e-17
WBGene00001368	154.923	1.16428	0.238687	4.87786	1.07243e-06	6.12982e-06
WBGene00001371	122.695	0.532833	0.175897	3.02922	0.00245183	0.00658573
WBGene00001372	285.408	-0.696764	0.145072	-4.80288	1.56397e-06	8.6636e-06
WBGene00001373	2.0038	1.36449	0.896104	1.52269	0.127835	0.197887
WBGene00001374	33.1988	1.40991	0.308088	4.57633	4.73212e-06	2.38558e-05
WBGene00001377	164.108	0.244209	0.202242	1.20751	0.227237	0.316664
WBGene00001385	425.821	-0.972069	0.185321	-5.24533	1.56004e-07	1.04939e-06
WBGene00001386	18927.6	-0.301507	0.0700176	-4.30616	1.66112e-05	7.47482e-05
WBGene00001387	31.587	-1.07519	0.300092	-3.58288	0.000339826	0.00113775
WBGene00001388	0.286021	-0.700416	2.37842	-0.294488	0.768385	NA
WBGene00001389	26.1269	-1.05738	0.308158	-3.43131	0.000600674	0.00188201
WBGene00001390	478.741	0.782074	0.110098	7.10341	1.21714e-12	1.7791e-11
WBGene00001391	51.9506	1.4491	0.78805	1.83885	0.0659376	0.11416
WBGene00001392	348.936	0.596023	0.216167	2.75724	0.0058292	0.0140339
WBGene00001393	2048.04	-0.861474	0.112817	-7.63604	2.24011e-14	3.99835e-13
WBGene00001394	9066.15	1.44052	0.145858	9.87615	5.28261e-23	2.02106e-21
WBGene00001395	842.134	1.24111	0.178387	6.95739	3.46623e-12	4.78448e-11
WBGene00001396	1977.35	1.08257	0.0818674	13.2235	6.41956e-40	5.85377e-38
WBGene00001397	57.9376	-1.65514	0.368825	-4.48761	7.20281e-06	3.50172e-05
WBGene00001398	3161.68	1.24042	0.160618	7.72284	1.13767e-14	2.10979e-13
WBGene00001399	161.704	-0.979244	0.556855	-1.75853	0.0786582	0.132444
WBGene00001400	5.91049	1.2545	0.554866	2.2609	0.0237655	0.0476745
WBGene00001401	400.01	0.0279554	0.211645	0.132086	0.894916	0.923082
WBGene00001402	222.333	0.315547	0.207091	1.52371	0.127581	0.197592
WBGene00001403	67.9398	0.97442	0.201531	4.83508	1.3309e-06	7.47367e-06
WBGene00001404	870.129	-1.08733	0.142199	-7.64653	2.06479e-14	3.71177e-13
WBGene00001405	926.317	-0.00462174	0.0992015	-0.0465894	0.96284	0.97342
WBGene00001406	102.783	-0.372575	0.160251	-2.32495	0.0200744	0.0411616
WBGene00001410	80.7168	2.0154	0.356709	5.64998	1.60465e-08	1.26922e-07
WBGene00001411	710.867	0.0045713	0.101985	0.0448235	0.964248	0.97438
WBGene00001412	759.786	-0.199872	0.11606	-1.72214	0.0850443	0.141491
WBGene00001413	479.168	-0.586079	0.134912	-4.34416	1.39811e-05	6.40596e-05
WBGene00001414	7.64537	1.18542	0.526909	2.24976	0.0244643	0.0489313
WBGene00001423	2457.74	-0.401807	0.142634	-2.81705	0.00484674	0.0119415
WBGene00001424	0	NA	NA	NA	NA	NA
WBGene00001425	23.3328	0.466433	0.296818	1.57144	0.11608	0.182924
WBGene00001426	358.904	0.281846	0.146018	1.93022	0.0535799	0.0958039
WBGene00001427	1146.86	-1.08283	0.124637	-8.68791	3.69163e-18	9.52624e-17
WBGene00001428	72.2043	0.240211	0.288541	0.8325	0.405127	0.502348
WBGene00001429	19.1219	1.01636	0.539556	1.88369	0.0596071	0.104871
WBGene00001430	198.677	0.450129	0.235803	1.90892	0.0562722	0.0999027
WBGene00001431	947.556	-0.631562	0.130222	-4.84989	1.23528e-06	6.96786e-06
WBGene00001432	32.4626	0.817242	0.399603	2.04514	0.0408415	0.07627
WBGene00001433	9.29184	0.193988	0.405646	0.478218	0.632495	0.711233
WBGene00001434	20.2191	0.0444709	0.312148	0.142468	0.886711	0.916499
WBGene00001435	72.8658	-0.811614	0.172637	-4.70128	2.5854e-06	1.37297e-05
WBGene00001436	88.7377	-1.19856	0.157932	-7.5891	3.22142e-14	5.59662e-13
WBGene00001437	13.1754	-0.787027	0.343158	-2.29348	0.0218203	0.0442526
WBGene00001438	8.5803	0.955342	0.447562	2.13454	0.0327982	0.0631527
WBGene00001439	374.401	0.834038	0.147652	5.64869	1.61679e-08	1.27711e-07
WBGene00001440	13.0957	1.31694	0.45814	2.87454	0.00404622	0.0101946
WBGene00001441	821.305	2.81999	0.162757	17.3264	2.97259e-67	6.22792e-65
WBGene00001442	1.09647	2.97588	1.42968	2.0815	0.0373879	0.0707212
WBGene00001443	1603.89	-0.269475	0.13288	-2.02796	0.0425645	0.0790016
WBGene00001444	33.7878	1.1435	0.260661	4.38691	1.14975e-05	5.35868e-05
WBGene00001445	12.3778	1.26267	0.402943	3.13362	0.00172666	0.00483492
WBGene00001446	88.2398	1.77934	0.188665	9.43118	4.05492e-21	1.3414e-19
WBGene00001447	35.2648	1.32774	0.254151	5.22424	1.74873e-07	1.16974e-06
WBGene00001448	39.4665	1.4884	0.245671	6.05852	1.3738e-09	1.32335e-08
WBGene00001449	53.5302	-0.136898	0.178232	-0.76809	0.442434	0.538366
WBGene00001450	31.496	1.29208	0.244908	5.27577	1.32202e-07	8.99135e-07
WBGene00001451	43.9285	1.30618	0.250324	5.21794	1.80923e-07	1.207e-06
WBGene00001452	112.896	1.4161	0.168878	8.38529	5.05988e-17	1.18574e-15
WBGene00001453	138.082	1.9341	0.178307	10.8471	2.05964e-27	1.02394e-25
WBGene00001454	38.0482	0.770195	0.231936	3.32072	0.000897842	0.00269093
WBGene00001455	123.635	1.5055	0.190272	7.91235	2.52578e-15	4.96107e-14
WBGene00001456	90.3041	1.56285	0.188182	8.30502	9.9804e-17	2.27815e-15
WBGene00001457	32.9261	1.22954	0.216845	5.67013	1.42689e-08	1.13937e-07
WBGene00001458	31.3488	1.04478	0.276991	3.77189	0.000162014	0.000589717
WBGene00001459	12.3683	0.885171	0.434017	2.03949	0.0414016	0.0771687
WBGene00001460	37.7915	0.99118	0.276205	3.58856	0.000332511	0.00111443
WBGene00001461	7.09395	1.10248	0.449888	2.45057	0.0142632	0.0306469
WBGene00001462	28.4149	1.49922	0.321251	4.66682	3.0589e-06	1.59791e-05
WBGene00001463	20.9387	1.53192	0.3086	4.96408	6.90289e-07	4.11391e-06
WBGene00001464	11.1454	1.48509	0.388474	3.82289	0.000131898	0.000489409
WBGene00001465	11.4852	0.733648	0.378424	1.93869	0.0525391	0.094264
WBGene00001466	13.3329	1.43072	0.342379	4.17875	2.93109e-05	0.0001246
WBGene00001468	27.6702	1.66925	0.330941	5.04396	4.55998e-07	2.82177e-06
WBGene00001470	726.241	-0.348989	0.0996059	-3.5037	0.000458847	0.00148589
WBGene00001475	433.447	1.70637	0.560224	3.04587	0.00232005	0.00627196
WBGene00001476	78.6679	2.07618	0.328199	6.32598	2.51623e-10	2.71011e-09
WBGene00001477	215.073	-5.1129	1.29357	-3.95254	NA	NA
WBGene00001478	25.5362	-1.17623	0.274028	-4.29238	1.7677e-05	7.90742e-05
WBGene00001479	319.261	0.692027	0.154263	4.48601	7.25699e-06	3.52222e-05
WBGene00001480	30.8705	0.751311	0.228629	3.28617	0.00101561	0.0030055
WBGene00001481	164.679	-0.567087	0.141109	-4.0188	5.84958e-05	0.000233017
WBGene00001482	297.425	-0.670688	0.116359	-5.76398	8.21544e-09	6.8588e-08
WBGene00001483	0.197183	0.284244	2.62984	0.108084	0.913929	NA
WBGene00001484	174.875	-0.142665	0.136543	-1.04484	0.296097	0.390836
WBGene00001485	208.376	-0.504262	0.119011	-4.23712	2.26405e-05	9.86751e-05
WBGene00001486	132.113	-0.295662	0.117399	-2.51844	0.0117878	0.0258895
WBGene00001487	2.84695	1.8329	0.78081	2.34744	0.018903	0.0391427
WBGene00001488	1794.81	0.576824	0.0883457	6.52917	6.61355e-11	7.71318e-10
WBGene00001489	194.999	1.15215	0.194653	5.91897	3.2396e-09	2.90442e-08
WBGene00001490	161.755	1.60369	0.21816	7.35098	1.96755e-13	3.14219e-12
WBGene00001491	510.233	-0.40291	0.0979008	-4.11549	3.86354e-05	0.000159912
WBGene00001492	69.2619	0.35688	0.180877	1.97306	0.0484888	0.0881838
WBGene00001493	1662.63	0.972797	0.121928	7.97843	1.48201e-15	2.96723e-14
WBGene00001494	37.7365	0.739936	0.217225	3.40631	0.000658465	0.00204704
WBGene00001495	21.6421	1.03409	0.308644	3.35042	0.000806902	0.00244628
WBGene00001496	809.962	0.346184	0.137401	2.51952	0.0117515	0.0258255
WBGene00001497	815.504	-0.458551	0.106257	-4.3155	1.59239e-05	7.19682e-05
WBGene00001498	1174.81	-0.320182	0.112125	-2.85559	0.00429575	0.0107342
WBGene00001499	1905.81	-0.738721	0.198386	-3.72366	0.000196353	0.000700938
WBGene00001500	2.96935	0.841129	0.766059	1.098	0.272206	0.365329
WBGene00001501	744.424	0.63274	0.144923	4.36604	1.26518e-05	5.84865e-05
WBGene00001502	1831.27	0.65947	0.128488	5.13254	2.85861e-07	1.83675e-06
WBGene00001503	1523.44	-0.479799	0.094886	-5.05659	4.26828e-07	2.65903e-06
WBGene00001505	121.587	1.41033	0.188297	7.4899	6.89247e-14	1.15195e-12
WBGene00001506	2.65798	1.54744	0.816933	1.8942	0.0581984	0.102742
WBGene00001507	6.78808	0.519278	0.452088	1.14862	0.250712	0.342224
WBGene00001508	111.8	0.872434	0.188892	4.6187	3.86155e-06	1.98017e-05
WBGene00001509	1587.63	-0.36245	0.178448	-2.03113	0.0422422	0.0785442
WBGene00001510	1990.2	-0.0220129	0.142711	-0.154249	0.877414	0.909025
WBGene00001511	700.44	-0.629575	0.0848098	-7.42338	1.1417e-13	1.87433e-12
WBGene00001512	3.46052	0.857949	0.664874	1.29039	0.196914	0.282069
WBGene00001513	1032.45	-0.469051	0.0735253	-6.37945	1.7772e-10	1.95604e-09
WBGene00001514	1277.77	-0.417462	0.116694	-3.57741	0.000347016	0.00115841
WBGene00001515	15.4731	1.61108	0.380013	4.23955	2.23973e-05	9.77847e-05
WBGene00001516	454.839	0.251315	0.0962207	2.61186	0.00900511	0.0205074
WBGene00001517	11.1558	1.5364	0.377912	4.06551	4.79283e-05	0.000194622
WBGene00001518	30.2695	1.34313	0.27127	4.95127	7.37317e-07	4.3661e-06
WBGene00001519	23.3573	1.19505	0.280418	4.26169	2.02889e-05	8.96019e-05
WBGene00001520	351.925	-0.0324418	0.0951021	-0.341126	0.733009	0.795034
WBGene00001522	46.838	-0.423565	0.189106	-2.23982	0.0251024	0.0500483
WBGene00001523	20.0619	1.43113	0.432807	3.30663	0.000944243	0.002818
WBGene00001526	1000.12	0.418373	0.104207	4.01481	5.94947e-05	0.000236674
WBGene00001527	1438.18	0.47108	0.155606	3.0274	0.00246671	0.00662065
WBGene00001528	0.210935	0.765132	3.09196	0.247459	0.804553	NA
WBGene00001529	0	NA	NA	NA	NA	NA
WBGene00001530	0.806453	0.773221	1.64017	0.471427	0.637336	0.715519
WBGene00001531	1.25581	1.94538	1.25929	1.54482	0.12239	0.191003
WBGene00001532	1.64089	1.9249	1.04745	1.83771	0.0661051	0.114397
WBGene00001533	1.10834	1.6113	1.31219	1.22794	0.219468	0.308081
WBGene00001534	2.34986	3.13112	1.2181	2.57049	0.0101555	0.0227331
WBGene00001535	17.7771	1.74872	0.423338	4.13079	3.61516e-05	0.000150837
WBGene00001536	8.40891	0.832279	0.45568	1.82646	0.0677816	0.116801
WBGene00001537	35.1036	1.1588	0.208935	5.54625	2.91853e-08	2.20066e-07
WBGene00001538	419.161	0.043725	0.116853	0.374188	0.708265	0.774304
WBGene00001539	1.5485	1.29387	1.04672	1.23611	0.216416	0.305038
WBGene00001540	3.83056	2.41805	0.87633	2.75929	0.00579275	0.0139615
WBGene00001541	7.92093	1.46365	0.452851	3.23209	0.0012289	0.0035736
WBGene00001542	1.2386	0.564136	1.04976	0.537396	0.590994	0.67606
WBGene00001543	25.3237	0.798635	0.330661	2.41527	0.0157235	0.0333757
WBGene00001544	6.12159	0.908809	0.533136	1.70465	0.0882599	0.145958
WBGene00001545	2.0607	0.228573	0.929238	0.245979	0.805699	0.854804
WBGene00001546	13.9234	0.777271	0.367332	2.11599	0.0343455	0.0656508
WBGene00001547	21.3141	1.50078	0.380642	3.94276	8.05508e-05	0.00031225
WBGene00001548	11.8014	0.883249	0.349888	2.52438	0.0115904	0.0255262
WBGene00001549	0.571642	2.62509	1.64057	1.60011	0.109574	0.174392
WBGene00001550	1.20829	1.43122	1.33946	1.0685	0.285293	0.379105
WBGene00001551	4.74049	1.48367	0.695144	2.13434	0.0328152	0.0631785
WBGene00001552	5.30821	2.12274	0.66396	3.19709	0.0013882	0.00398223
WBGene00001553	9.61918	1.3588	0.456066	2.97939	0.00288826	0.00760151
WBGene00001554	6.50514	2.11494	0.699923	3.02167	0.00251382	0.00673068
WBGene00001555	3.79159	1.6914	0.614942	2.7505	0.00595044	0.0142809
WBGene00001556	3.04037	1.31067	0.744046	1.76154	0.0781472	0.13171
WBGene00001557	2.78437	1.40069	0.943923	1.4839	0.137835	0.210478
WBGene00001558	3763.91	0.171114	0.0735504	2.32649	0.0199924	0.0410268
WBGene00001559	321.772	2.30107	0.185204	12.4245	1.92474e-35	1.39397e-33
WBGene00001560	619.147	1.33215	0.172326	7.73042	1.07195e-14	1.99844e-13
WBGene00001561	1139.58	0.139647	0.0890637	1.56795	0.116893	0.183945
WBGene00001562	2027.3	0.0578327	0.1335	0.433203	0.664867	0.738653
WBGene00001563	1182.15	-0.447524	0.107755	-4.15316	3.27916e-05	0.000138095
WBGene00001564	2159.79	-1.54543	0.295954	-5.22186	1.77138e-07	1.18309e-06
WBGene00001565	723.101	-0.121142	0.108392	-1.11762	0.263728	0.356506
WBGene00001566	300.137	-0.880709	0.133565	-6.59385	4.28576e-11	5.12748e-10
WBGene00001568	1823.54	-0.416326	0.13335	-3.12206	0.00179591	0.00500795
WBGene00001569	808.052	-0.878968	0.0984162	-8.93113	4.21672e-19	1.18736e-17
WBGene00001570	333.869	1.99746	0.673033	2.96785	0.00299888	0.00785026
WBGene00001571	461.85	-1.0488	0.130208	-8.05482	7.95991e-16	1.64614e-14
WBGene00001572	55.6652	0.948253	0.210637	4.50183	6.73707e-06	3.29258e-05
WBGene00001574	1544.22	-0.221302	0.128053	-1.72821	0.083951	0.139871
WBGene00001575	2.00855	0.541572	0.833146	0.650032	0.515671	0.60745
WBGene00001577	277.218	1.60246	0.232663	6.88745	5.67999e-12	7.64237e-11
WBGene00001578	89.5723	0.0828876	0.212692	0.389707	0.696753	0.764807
WBGene00001579	937.992	0.026219	0.0867301	0.302306	0.762419	0.819308
WBGene00001580	2050.08	-0.563112	0.166111	-3.38998	0.000698981	0.00215415
WBGene00001581	11790.6	2.01577	0.13065	15.4288	1.04868e-53	1.53798e-51
WBGene00001582	2254.68	-0.0240833	0.118868	-0.202605	0.839444	0.880468
WBGene00001583	216.181	-0.369568	0.126797	-2.91464	0.00356104	0.00911442
WBGene00001584	993.54	-0.602152	0.136457	-4.41277	1.02054e-05	4.81516e-05
WBGene00001585	84.3986	-0.742277	0.183238	-4.05088	5.10243e-05	0.00020544
WBGene00001586	3.99853	1.10071	0.62309	1.76653	0.0773068	0.130518
WBGene00001587	5.49697	2.47062	0.590332	4.18514	2.84987e-05	0.000121499
WBGene00001588	5.37799	1.01387	0.562562	1.80224	0.0715078	0.122288
WBGene00001589	561.419	-0.316984	0.129278	-2.45195	0.0142083	0.0305463
WBGene00001590	76.1568	-0.709301	0.187442	-3.78411	0.000154262	0.000563831
WBGene00001591	306.056	1.76859	0.202962	8.7139	2.93593e-18	7.67748e-17
WBGene00001592	24.6352	0.405338	0.265825	1.52483	0.127301	0.197233
WBGene00001593	11.6391	1.68646	0.411234	4.10097	4.1143e-05	0.000169295
WBGene00001594	34.0079	0.630533	0.307473	2.0507	0.0402966	0.0753565
WBGene00001595	5390.61	-0.753953	0.168648	-4.47057	7.801e-06	3.75841e-05
WBGene00001596	3331.79	-0.529623	0.202007	-2.6218	0.0087466	0.0199989
WBGene00001597	1162.62	-0.907268	0.109489	-8.2864	1.16727e-16	2.64385e-15
WBGene00001598	2042.11	-0.674104	0.159624	-4.22308	2.40991e-05	0.000104566
WBGene00001599	1102.85	-0.583001	0.138308	-4.21523	2.49523e-05	0.000107816
WBGene00001600	875.189	-0.442127	0.165071	-2.67841	0.00739734	0.0172775
WBGene00001601	833.268	-0.438515	0.12691	-3.45531	0.000549661	0.00174078
WBGene00001602	109.338	0.0281871	0.141146	0.199702	0.841714	0.882165
WBGene00001603	4.022	1.92423	0.796269	2.41656	0.0156679	0.0332819
WBGene00001604	335.439	-0.776648	0.141509	-5.48832	4.05774e-08	2.99171e-07
WBGene00001605	0.540139	1.79142	1.83559	0.975936	0.329096	NA
WBGene00001606	2817.35	-0.400322	0.107691	-3.71733	0.00020134	0.000716413
WBGene00001607	1197.54	-0.698893	0.180729	-3.86708	0.000110147	0.000415269
WBGene00001608	5.41223	1.95482	0.630492	3.10047	0.00193212	0.00533974
WBGene00001609	2704.94	-0.618024	0.134476	-4.59579	4.31118e-06	2.18652e-05
WBGene00001612	20.751	2.20637	0.416527	5.29705	1.17686e-07	8.05894e-07
WBGene00001613	9.2684	1.76044	0.430456	4.0897	4.31923e-05	0.000176695
WBGene00001614	1.73771	1.7883	0.97381	1.8364	0.0662989	0.114639
WBGene00001615	28.0271	0.507706	0.249834	2.03218	0.0421357	0.0783876
WBGene00001616	41.9666	1.31222	0.219396	5.98108	2.21664e-09	2.05752e-08
WBGene00001617	67.9126	0.932753	0.171981	5.42359	5.84129e-08	4.20281e-07
WBGene00001618	4.42052	0.406686	0.625151	0.65054	0.515343	0.607195
WBGene00001619	4.08818	1.97237	0.703226	2.80475	0.0050356	0.0123428
WBGene00001620	165.633	-0.609111	0.169555	-3.59241	0.000327628	0.00110016
WBGene00001621	69.28	0.707167	0.228662	3.09263	0.00198389	0.00546564
WBGene00001622	41.253	0.955744	0.219911	4.34604	1.38616e-05	6.35786e-05
WBGene00001623	39.0197	1.76578	0.400446	4.40953	1.03595e-05	4.88001e-05
WBGene00001624	31.327	0.460504	0.285682	1.61195	0.106973	0.171055
WBGene00001625	4.7729	1.02932	0.555473	1.85306	0.063874	0.111134
WBGene00001626	0.834338	1.88745	1.54583	1.22099	0.222091	0.310846
WBGene00001627	61.2233	0.473881	0.180616	2.62369	0.00869835	0.0198963
WBGene00001628	1459.5	-0.585372	0.162336	-3.60594	0.000311025	0.00105081
WBGene00001629	236.99	0.673156	0.114612	5.87335	4.27078e-09	3.7431e-08
WBGene00001630	1025.36	0.928747	0.109709	8.46559	2.54854e-17	6.12729e-16
WBGene00001631	243.112	0.554989	0.205697	2.6981	0.00697368	0.0164231
WBGene00001632	1102.94	-0.329025	0.114364	-2.87699	0.00401489	0.0101258
WBGene00001633	19.1229	-0.594096	0.316889	-1.87478	0.0608233	0.106712
WBGene00001635	497.159	-0.483222	0.122955	-3.93007	8.49212e-05	0.000328107
WBGene00001636	101.167	0.0382661	0.134898	0.283667	0.776666	0.831268
WBGene00001637	15.3146	-0.244359	0.298703	-0.818067	0.413319	0.510385
WBGene00001638	112.904	0.84811	0.137403	6.17244	6.7243e-10	6.85637e-09
WBGene00001639	5.18492	0.0245143	0.489233	0.0501075	0.960037	0.971072
WBGene00001640	0.116089	-0.196653	3.11654	-0.0630998	0.949687	NA
WBGene00001641	0	NA	NA	NA	NA	NA
WBGene00001642	0	NA	NA	NA	NA	NA
WBGene00001643	4.2491	0.472086	0.58238	0.810615	0.417587	0.514203
WBGene00001644	55.7036	1.88966	0.209896	9.00287	2.19893e-19	6.32335e-18
WBGene00001645	789.859	-0.382723	0.126423	-3.02732	0.0024673	0.00662122
WBGene00001646	23.8321	0.370857	0.290693	1.27577	0.202038	0.288211
WBGene00001647	1729.02	-0.646021	0.130226	-4.96077	7.02129e-07	4.18024e-06
WBGene00001648	2801.29	-0.0669848	0.181096	-0.369886	0.711467	0.777178
WBGene00001649	274.734	-0.11197	0.114543	-0.977537	0.328304	0.425183
WBGene00001650	267.07	0.712036	0.137662	5.17234	2.31178e-07	1.51077e-06
WBGene00001651	635.895	0.21416	0.129982	1.64761	0.0994329	0.160868
WBGene00001653	1995.95	-0.623699	0.147777	-4.22055	2.43707e-05	0.00010553
WBGene00001660	301.745	-0.395754	0.128382	-3.08263	0.00205181	0.00562547
WBGene00001661	274.127	-0.343885	0.121922	-2.82053	0.00479444	0.0118275
WBGene00001662	329.227	-0.227866	0.106909	-2.13139	0.0330571	0.0635678
WBGene00001663	8.68588	0.274623	0.404481	0.678951	0.497169	0.590078
WBGene00001664	13.3305	1.22984	0.443665	2.772	0.00557132	0.013498
WBGene00001665	15.681	1.64292	0.418573	3.92506	8.67093e-05	0.000334648
WBGene00001666	19.7776	-0.319824	0.287265	-1.11334	0.265562	0.358461
WBGene00001667	1.78983	1.29675	0.919956	1.40957	0.158666	0.23664
WBGene00001668	1.21586	1.53287	1.10747	1.38412	0.166322	0.245998
WBGene00001669	33.3526	1.10419	0.240231	4.59636	4.29934e-06	2.18115e-05
WBGene00001670	1.04366	2.87732	1.43621	2.00341	0.0451337	0.0829998
WBGene00001671	4.9081	1.08998	0.677341	1.60921	0.107571	0.171838
WBGene00001672	4.18982	2.05193	0.667415	3.07445	0.00210892	0.00576229
WBGene00001673	1.75373	1.76239	0.935645	1.88361	0.0596178	0.104879
WBGene00001674	11.1999	0.207384	0.37441	0.553896	0.57965	0.666041
WBGene00001675	4.99379	1.79534	0.57632	3.11519	0.00183829	0.0051101
WBGene00001676	5.39131	0.846793	0.562139	1.50638	0.131971	0.203091
WBGene00001677	4.05572	0.55278	0.566428	0.975905	0.329111	0.425982
WBGene00001678	301.716	-0.298612	0.162704	-1.83531	0.0664604	0.114845
WBGene00001679	1246.23	0.425872	0.0943364	4.51439	6.34991e-06	3.12069e-05
WBGene00001680	70.468	1.09049	0.2289	4.76406	1.89739e-06	1.03735e-05
WBGene00001681	41.4909	1.72712	0.320334	5.39164	6.9818e-08	4.95654e-07
WBGene00001682	181.114	0.47583	0.239465	1.98706	0.0469161	0.0858113
WBGene00001683	3113.87	-1.07139	0.110919	-9.65922	4.49259e-22	1.61687e-20
WBGene00001684	2110.66	-0.594534	0.126851	-4.68687	2.77415e-06	1.46306e-05
WBGene00001685	2628.67	-0.182758	0.134939	-1.35438	0.175615	0.257061
WBGene00001686	3103.23	-1.2243	0.129081	-9.48475	2.42962e-21	8.20709e-20
WBGene00001687	31.198	2.32266	0.306892	7.56832	3.78072e-14	6.52322e-13
WBGene00001688	244.683	-0.454743	0.118508	-3.83725	0.00012442	0.000463717
WBGene00001689	244.691	-0.447517	0.102659	-4.35928	1.30492e-05	6.01499e-05
WBGene00001690	43.5755	1.43337	0.237395	6.0379	1.56132e-09	1.48552e-08
WBGene00001691	10.0297	3.37706	0.590658	5.71745	1.08132e-08	8.83483e-08
WBGene00001692	77.2561	-3.71648	0.283189	-13.1237	2.40894e-39	2.14116e-37
WBGene00001693	4.03919	-5.56988	0.996087	-5.59177	2.24771e-08	1.73497e-07
WBGene00001694	60.6188	-1.6452	0.260115	-6.32487	2.53439e-10	2.72799e-09
WBGene00001695	14.4992	2.65155	0.684189	3.87547	0.000106419	0.000402769
WBGene00001696	0.457657	1.30623	1.90787	0.684654	0.493562	NA
WBGene00001697	0.118834	0.765132	3.11654	0.245507	0.806064	NA
WBGene00001698	0.474758	-1.04564	1.70072	-0.61482	0.538674	NA
WBGene00001699	12.9436	0.359108	0.484831	0.740686	0.458884	0.553978
WBGene00001700	10.0053	2.95683	0.520377	5.6821	1.33052e-08	1.07019e-07
WBGene00001701	3.11992	3.216	0.949736	3.3862	0.000708667	0.00218001
WBGene00001702	7.26126	0.059206	0.677926	0.087334	0.930406	0.949781
WBGene00001703	13.4545	0.242356	0.398903	0.607555	0.543483	0.633847
WBGene00001704	0.182862	-1.18482	3.11429	-0.380447	0.703614	NA
WBGene00001705	9.72056	1.66531	0.653489	2.54833	0.0108239	0.0240456
WBGene00001706	0	NA	NA	NA	NA	NA
WBGene00001707	168.286	1.90905	0.37846	5.04425	4.55298e-07	2.82041e-06
WBGene00001708	385.699	-0.388203	0.156361	-2.48273	0.0130379	0.0283733
WBGene00001709	74.1466	0.488783	0.15548	3.1437	0.00166825	0.00469153
WBGene00001710	13.546	2.26456	0.518831	4.36474	1.27276e-05	5.87906e-05
WBGene00001711	7.14982	0.91722	0.684266	1.34044	0.180101	0.262188
WBGene00001712	1.23238	-0.230945	1.08529	-0.212797	0.831486	0.874989
WBGene00001713	39.8149	-0.324097	0.311612	-1.04007	0.298309	0.393224
WBGene00001714	24.8962	2.36645	0.902953	2.62079	0.0087726	0.0200505
WBGene00001715	0.827215	-0.246742	1.42164	-0.173561	0.862211	0.897766
WBGene00001716	83.0245	2.47963	0.769455	3.22258	0.00127043	0.00367433
WBGene00001717	8.12637	-0.478507	0.426252	-1.12259	0.261612	0.354216
WBGene00001718	0.455727	-0.188239	1.58729	-0.118592	0.905599	NA
WBGene00001719	35.2078	1.68998	0.377327	4.47882	7.50558e-06	3.63286e-05
WBGene00001720	0.417463	2.14949	1.83925	1.16868	0.242533	NA
WBGene00001721	2.90061	2.07958	0.813539	2.55622	0.0105817	0.023582
WBGene00001722	1.8249	3.73195	1.08504	3.43947	0.000582858	0.0018337
WBGene00001723	7.08801	1.79712	0.509481	3.52735	0.000419735	0.00137406
WBGene00001724	87.1164	2.60611	0.696587	3.74125	0.00018311	0.00065816
WBGene00001725	156.223	3.20812	0.689455	4.65312	3.26951e-06	1.70186e-05
WBGene00001726	2.65205	0.631077	0.769277	0.820351	0.412016	0.508979
WBGene00001727	3.3219	0.480975	0.658565	0.730338	0.465184	0.560047
WBGene00001728	0.117637	0.765132	3.11654	0.245507	0.806064	NA
WBGene00001729	0.456252	-0.347475	1.7474	-0.198852	0.842378	NA
WBGene00001730	43.8111	2.58301	0.826347	3.12582	0.0017731	0.00494843
WBGene00001731	3.05554	-0.580166	0.744084	-0.779706	0.435564	0.532141
WBGene00001732	0.296438	-0.21681	2.06549	-0.104968	0.916401	NA
WBGene00001733	0.509051	0.667425	2.21483	0.301344	0.763153	NA
WBGene00001734	5.31923	0.0065378	0.581255	0.0112477	0.991026	0.993427
WBGene00001735	0.807623	0.826582	1.28371	0.643898	0.519641	0.611145
WBGene00001736	0.0564648	-0.677547	3.11654	-0.217404	0.827894	NA
WBGene00001737	0.082922	-0.677547	3.11654	-0.217404	0.827894	NA
WBGene00001738	0.204753	-0.196653	3.10816	-0.0632699	0.949552	NA
WBGene00001739	0.425594	0.24103	1.93719	0.124422	0.900981	NA
WBGene00001740	66.7789	-0.0898672	0.170179	-0.528074	0.597448	0.681608
WBGene00001743	633.301	0.112997	0.0902838	1.25158	0.210724	0.298402
WBGene00001744	1912.48	-0.756905	0.129247	-5.85628	4.73348e-09	4.1199e-08
WBGene00001745	207.407	1.23618	0.190722	6.4816	9.07544e-11	1.04323e-09
WBGene00001746	3023.27	0.0823357	0.164885	0.499353	0.61753	0.698677
WBGene00001747	3918.8	-0.124649	0.14851	-0.839332	0.401283	0.498847
WBGene00001748	3173.08	-0.0641252	0.0804309	-0.797271	0.425294	0.521803
WBGene00001749	937.011	0.253818	0.162829	1.5588	0.119043	0.186723
WBGene00001750	3.45613	1.91429	0.817364	2.34203	0.019179	0.0396536
WBGene00001751	4.69782	1.71571	0.795315	2.15727	0.0309845	0.0601076
WBGene00001752	47.4416	-0.82737	0.294337	-2.81096	0.00493942	0.0121375
WBGene00001753	944.571	3.02739	0.302094	10.0213	1.22836e-23	4.92434e-22
WBGene00001754	152.829	3.51715	0.341193	10.3084	6.4575e-25	2.77862e-23
WBGene00001755	437.491	0.648063	0.210877	3.07318	0.00211789	0.00578411
WBGene00001756	5.18771	3.8766	0.826637	4.68961	2.73733e-06	1.44581e-05
WBGene00001757	6.45963	-1.88043	0.572557	-3.28426	0.0010225	0.00302335
WBGene00001758	69.5781	-0.379661	0.212659	-1.7853	0.0742127	0.12609
WBGene00001759	4.12856	0.710268	0.605717	1.17261	0.240953	0.331888
WBGene00001760	22.5253	1.88771	0.298881	6.31592	2.68551e-10	2.88536e-09
WBGene00001761	225.927	1.37907	0.148959	9.25807	2.08163e-20	6.58895e-19
WBGene00001762	2.05917	2.2171	1.00543	2.20514	0.0274446	0.0540568
WBGene00001763	4.09015	0.854812	0.695641	1.22881	0.219142	0.307772
WBGene00001764	46.1658	1.26221	0.215914	5.84591	5.03815e-09	4.3635e-08
WBGene00001765	1.12728	-1.56861	1.14067	-1.37517	0.16908	0.249279
WBGene00001766	0.382325	-1.44302	1.92907	-0.748036	0.454438	NA
WBGene00001767	1.7229	-1.69336	1.02517	-1.65179	0.0985767	0.159703
WBGene00001768	150.185	1.83388	0.23187	7.90909	2.59285e-15	5.07582e-14
WBGene00001769	1.87203	-0.293527	0.844598	-0.347534	0.72819	0.79111
WBGene00001770	42.9643	2.74137	0.326446	8.39762	4.55614e-17	1.06911e-15
WBGene00001771	2.37292	1.60349	0.839715	1.90957	0.0561888	0.0998049
WBGene00001772	17.4093	2.51866	0.451299	5.58092	2.39253e-08	1.83309e-07
WBGene00001773	0.859593	1.98881	1.37155	1.45005	0.147044	0.222399
WBGene00001774	146.317	-1.00463	0.180859	-5.55476	2.77989e-08	2.10242e-07
WBGene00001775	165.713	-1.70394	0.161984	-10.5192	7.0489e-26	3.256e-24
WBGene00001776	36.7378	-0.289365	0.382478	-0.756552	0.449318	0.544973
WBGene00001777	2.06922	-1.11849	0.934786	-1.19652	0.231493	0.321106
WBGene00001778	23.2207	1.71079	0.416446	4.10806	3.98988e-05	0.000164715
WBGene00001779	2.67687	2.09797	0.813381	2.57932	0.00989951	0.0222221
WBGene00001780	0.893406	-2.19602	1.36821	-1.60503	0.108487	0.173018
WBGene00001781	3.90321	0.226383	0.655257	0.345488	0.729728	0.792257
WBGene00001782	0.0596239	0.284238	3.11654	0.0912031	0.927331	NA
WBGene00001783	6.15316	1.36488	0.571362	2.38882	0.0169028	0.0355191
WBGene00001784	156.148	0.00811959	0.167673	0.0484252	0.961377	0.972205
WBGene00001785	0.673242	2.80281	2.36791	1.18367	0.236545	0.326968
WBGene00001786	437.506	6.3576	0.483172	13.1581	1.52971e-39	1.37354e-37
WBGene00001787	50.8087	0.501401	0.246468	2.03434	0.0419171	0.0780139
WBGene00001788	6.25848	0.649393	0.455097	1.42693	0.153599	0.230138
WBGene00001789	16.9909	1.5144	0.408135	3.71054	0.000206816	0.000732936
WBGene00001790	76.8484	0.179456	0.204116	0.87919	0.379298	0.476295
WBGene00001791	17.5632	0.140743	0.285977	0.492148	0.622615	0.703073
WBGene00001792	7.78082	-0.165306	0.39589	-0.417555	0.676273	0.747972
WBGene00001793	716.864	-0.830747	0.127987	-6.49089	8.53304e-11	9.82808e-10
WBGene00001794	1682.25	-0.403531	0.0978946	-4.12209	3.75445e-05	0.000155836
WBGene00001795	328.495	1.73798	0.144242	12.0491	1.9619e-33	1.28355e-31
WBGene00001796	16.8839	-0.311104	0.280931	-1.10741	0.268119	0.361137
WBGene00001803	22.7173	2.09832	0.299412	7.00813	2.41526e-12	3.38424e-11
WBGene00001804	0.654059	2.16984	1.39729	1.55288	0.120451	0.188512
WBGene00001805	3.98223	1.15483	0.647703	1.78296	0.0745932	0.126617
WBGene00001806	2.39987	0.773227	0.857592	0.901626	0.367256	0.464381
WBGene00001808	16.4368	-0.693142	0.301563	-2.2985	0.0215335	0.0437758
WBGene00001811	42.923	-0.0457857	0.212556	-0.215406	0.829451	0.873475
WBGene00001812	1151.36	-0.0907861	0.100566	-0.902752	0.366658	0.463797
WBGene00001813	509.994	-0.464954	0.127467	-3.64765	0.000264649	0.000910363
WBGene00001814	335.994	1.31364	0.124907	10.517	7.21475e-26	3.32388e-24
WBGene00001815	422.163	-0.398691	0.13879	-2.87261	0.00407092	0.010248
WBGene00001816	183.168	-0.554137	0.157301	-3.52279	0.000427033	0.00139302
WBGene00001817	265.594	2.15159	0.164731	13.0612	5.48501e-39	4.6524e-37
WBGene00001818	0	NA	NA	NA	NA	NA
WBGene00001819	303.336	1.61354	0.168341	9.58496	9.2493e-22	3.23615e-20
WBGene00001820	184.907	0.126629	0.232859	0.543802	0.586578	0.672103
WBGene00001821	78.2081	0.718225	0.347965	2.06407	0.0390111	0.0733187
WBGene00001823	58.8598	0.162042	0.198145	0.817795	0.413474	0.51054
WBGene00001824	1366.36	1.67939	0.561948	2.98852	0.0028033	0.00741437
WBGene00001827	3726.79	-0.59285	0.126642	-4.68132	2.85039e-06	1.50057e-05
WBGene00001828	164.596	1.26146	0.684294	1.84344	0.0652647	0.113128
WBGene00001829	4179.52	-0.74561	0.130824	-5.69932	1.20287e-08	9.74365e-08
WBGene00001830	2790.49	-0.609701	0.112457	-5.42165	5.905e-08	4.24321e-07
WBGene00001831	303.293	-0.737198	0.153739	-4.79514	1.62563e-06	8.98536e-06
WBGene00001832	613.814	-0.454541	0.159355	-2.85239	0.00433925	0.0108306
WBGene00001833	1649.44	-0.587935	0.0930371	-6.31936	2.62648e-10	2.82367e-09
WBGene00001834	2305.59	-0.467927	0.0830406	-5.63492	1.75144e-08	1.37421e-07
WBGene00001835	489.876	-0.518595	0.0938956	-5.52311	3.3306e-08	2.48054e-07
WBGene00001836	454.803	-0.39851	0.106012	-3.7591	0.000170529	0.000617518
WBGene00001837	386.495	0.823821	0.122588	6.72022	1.8145e-11	2.28259e-10
WBGene00001838	150.815	0.109001	0.144229	0.755745	0.449802	0.545372
WBGene00001839	3.30547	0.329779	0.774261	0.425927	0.670161	0.742939
WBGene00001840	5314.32	-0.579558	0.117506	-4.93216	8.1327e-07	4.7725e-06
WBGene00001841	2.70426	-2.04	0.825865	-2.47014	0.0135061	0.0292115
WBGene00001842	26.152	-0.113057	0.293663	-0.384988	0.700246	0.767636
WBGene00001843	486.808	-0.0136687	0.156874	-0.0871319	0.930567	0.949889
WBGene00001844	171.752	0.818251	0.137148	5.9662	2.42841e-09	2.23992e-08
WBGene00001851	1824.48	0.760004	0.0877979	8.65629	4.87375e-18	1.23771e-16
WBGene00001852	47.2723	2.12383	0.428369	4.95794	7.12443e-07	4.23591e-06
WBGene00001853	460.731	0.142028	0.216992	0.654531	0.51277	0.605085
WBGene00001854	247.664	-0.0238155	0.250495	-0.0950737	0.924256	0.944818
WBGene00001855	857.398	-0.935307	0.15254	-6.13154	8.70322e-10	8.69779e-09
WBGene00001856	307.761	-0.649124	0.226353	-2.86775	0.00413403	0.0103802
WBGene00001857	1.97795	-1.00246	0.918254	-1.0917	0.274964	0.368076
WBGene00001858	157.767	1.718	0.768972	2.23415	0.0254731	0.0506899
WBGene00001859	3.29486	0.353811	0.625604	0.565551	0.571699	0.659111
WBGene00001860	2227.76	-0.479047	0.0998104	-4.79957	1.59008e-06	8.80546e-06
WBGene00001862	239.319	-0.614376	0.16278	-3.77426	0.000160482	0.000584503
WBGene00001863	657.966	-0.468364	0.150886	-3.10408	0.0019087	0.00528579
WBGene00001864	151.718	-0.415461	0.23782	-1.74696	0.080645	0.135117
WBGene00001865	719.253	-0.648979	0.113036	-5.74136	9.39179e-09	7.75627e-08
WBGene00001867	199.946	-0.647535	0.144844	-4.47057	7.80129e-06	3.75841e-05
WBGene00001869	577.178	-0.795881	0.0891098	-8.93147	4.20398e-19	1.18567e-17
WBGene00001872	150.591	-0.865375	0.133642	-6.47535	9.45929e-11	1.08523e-09
WBGene00001874	2227.16	-0.559935	0.14576	-3.84148	0.000122295	0.000456959
WBGene00001875	2.66261	-0.14953	0.846898	-0.176562	0.859853	0.896106
WBGene00001876	3.62966	-1.49096	0.679767	-2.19333	0.0282833	0.0554728
WBGene00001877	2.39215	0.244542	0.791459	0.308976	0.75734	0.815389
WBGene00001878	19.7373	0.862229	0.293307	2.93968	0.00328552	0.00849946
WBGene00001879	3.11458	-1.31034	0.700336	-1.87101	0.0613435	0.107464
WBGene00001880	6.196	-1.29709	0.616174	-2.10507	0.0352855	0.0672523
WBGene00001881	2.36026	-1.67058	0.745898	-2.23968	0.0251114	0.0500607
WBGene00001882	1.30936	-0.286488	1.09732	-0.26108	0.794031	0.845996
WBGene00001883	9.39146	1.51009	0.495776	3.04591	0.00231974	0.00627196
WBGene00001884	0.118834	0.765132	3.11654	0.245507	0.806064	NA
WBGene00001885	2.1785	2.51156	1.08296	2.31917	0.0203856	0.0417268
WBGene00001886	2.80372	1.04244	0.728511	1.43092	0.152454	0.228904
WBGene00001887	7.73375	1.90664	0.563542	3.38332	0.000716149	0.00219995
WBGene00001888	0.36156	1.07903	1.95442	0.552101	0.580879	NA
WBGene00001889	2.815	2.88735	1.03415	2.79199	0.00523848	0.0127827
WBGene00001890	0.911298	1.62626	1.23316	1.31877	0.187246	0.270869
WBGene00001891	2.67594	0.162604	0.727666	0.22346	0.823178	0.86848
WBGene00001892	1.88684	-0.284907	0.994031	-0.286618	0.774405	0.829151
WBGene00001893	2.38245	-1.08241	0.753922	-1.4357	0.151087	0.227283
WBGene00001894	0.424029	-0.88925	2.68914	-0.330682	0.740885	NA
WBGene00001895	0.945486	2.59596	1.36003	1.90875	0.0562943	0.0999317
WBGene00001896	4.47258	-1.53242	0.587314	-2.60921	0.00907524	0.0206297
WBGene00001898	290.033	-0.0537026	0.300158	-0.178915	0.858005	0.894922
WBGene00001899	4.05562	1.90111	0.818924	2.32148	0.0202612	0.0415059
WBGene00001900	11.6566	1.82423	0.542128	3.36495	0.000765583	0.00233307
WBGene00001901	2.09459	-0.318022	0.777879	-0.408832	0.682663	0.753099
WBGene00001902	1.80364	0.739858	0.846438	0.874085	0.382072	0.478787
WBGene00001903	0	NA	NA	NA	NA	NA
WBGene00001904	0.959711	-1.56536	1.42002	-1.10235	0.270308	0.363252
WBGene00001905	3.08324	-0.659595	0.670084	-0.984347	0.324945	0.421671
WBGene00001906	8.25868	-0.860858	0.552076	-1.55931	0.118922	0.186601
WBGene00001907	0.280313	-1.59701	2.37747	-0.671727	0.501758	NA
WBGene00001908	1.18671	0.169504	1.40986	0.120227	0.904303	0.930148
WBGene00001909	262.578	0.799311	0.151676	5.26988	1.36517e-07	9.2584e-07
WBGene00001910	66.7228	-0.102487	0.279596	-0.366553	0.713952	0.77936
WBGene00001911	383.111	0.941892	0.176403	5.33943	9.32404e-08	6.48336e-07
WBGene00001912	9.7341	-2.29137	0.490556	-4.67097	2.99775e-06	1.57016e-05
WBGene00001913	0	NA	NA	NA	NA	NA
WBGene00001914	8.10938	-2.2894	0.542191	-4.22249	2.41615e-05	0.000104785
WBGene00001915	25.2382	1.11564	0.35881	3.10926	0.00187553	0.00520295
WBGene00001916	1.12465	1.75934	1.13574	1.54907	0.121365	0.189723
WBGene00001917	36.497	2.31793	0.288161	8.04387	8.70482e-16	1.78342e-14
WBGene00001918	1.12877	2.3505	1.22131	1.92458	0.0542823	0.0968976
WBGene00001919	15.8996	-0.54823	0.286976	-1.91037	0.0560855	0.0996371
WBGene00001920	1.15703	0.893284	1.03247	0.86519	0.386935	0.483847
WBGene00001921	1.40049	0.182677	1.11506	0.163828	0.869867	0.903333
WBGene00001922	46.016	-0.576661	0.30159	-1.91207	0.0558675	0.0992943
WBGene00001923	3.9499	-1.22467	0.612893	-1.99818	0.0456972	0.0838608
WBGene00001924	1.93046	0.758557	0.909499	0.834038	0.404259	0.501626
WBGene00001925	0.923859	-0.155874	1.34496	-0.115895	0.907735	0.932262
WBGene00001926	4.51011	-0.823667	0.572765	-1.43806	0.150418	0.226407
WBGene00001927	3.78471	-1.9145	0.640755	-2.98787	0.00280926	0.00742494
WBGene00001928	1.30197	-0.65768	1.02544	-0.641363	0.521287	0.612711
WBGene00001929	1.78647	0.238413	0.867517	0.274822	0.783453	0.837244
WBGene00001930	8.14139	-0.212893	0.424202	-0.501868	0.61576	0.697296
WBGene00001931	16.3986	0.112742	0.327111	0.344659	0.730351	0.792835
WBGene00001932	18.9199	-0.887912	0.331377	-2.67946	0.00737408	0.01723
WBGene00001933	41.0162	-0.715801	0.270456	-2.64664	0.00812961	0.0187588
WBGene00001934	27.1874	-0.440966	0.276239	-1.59632	0.110417	0.175509
WBGene00001935	23.895	-0.886996	0.353226	-2.51113	0.0120345	0.0263722
WBGene00001936	3.43621	-0.60697	0.710207	-0.854639	0.392751	0.489798
WBGene00001937	4.55227	-0.0401131	0.551154	-0.0727801	0.941981	0.957819
WBGene00001938	2.20874	0.395306	0.889684	0.444322	0.65681	0.731826
WBGene00001939	9.3978	0.186865	0.369682	0.505475	0.613225	0.695166
WBGene00001940	20.7804	-0.734577	0.309479	-2.37359	0.0176161	0.0368333
WBGene00001941	53.7611	-1.68202	0.188357	-8.92997	4.26137e-19	1.19802e-17
WBGene00001942	127.15	-1.15976	0.246213	-4.71039	2.47248e-06	1.31619e-05
WBGene00001943	0.53931	-1.91684	1.50169	-1.27645	0.201795	NA
WBGene00001944	0.239995	1.42076	3.02618	0.46949	0.638719	NA
WBGene00001945	227.638	1.50887	0.281168	5.36644	8.03038e-08	5.65306e-07
WBGene00001946	1023.3	-0.0198493	0.191312	-0.103754	0.917365	0.940057
WBGene00001947	1.9578	0.850136	0.900576	0.943991	0.345174	0.442216
WBGene00001948	15.0687	1.14238	0.509382	2.24269	0.0249169	0.0497354
WBGene00001949	180.553	-0.170081	0.182073	-0.934137	0.350233	0.447362
WBGene00001950	82.2717	-0.236373	0.180908	-1.3066	0.19135	0.275466
WBGene00001951	4.39937	1.4086	0.779529	1.80699	0.0707644	0.121197
WBGene00001952	8.66558	1.22502	0.501778	2.44135	0.0146325	0.0313167
WBGene00001953	0.575075	0.111708	1.60007	0.0698148	0.944341	0.959693
WBGene00001954	1.78099	1.50682	1.08502	1.38875	0.164908	0.244376
WBGene00001955	319.795	0.790494	0.121031	6.53133	6.5189e-11	7.61288e-10
WBGene00001956	4.41385	1.93959	0.697428	2.78105	0.00541828	0.0131598
WBGene00001957	1.10509	0.625081	1.12275	0.556742	0.577704	0.66425
WBGene00001958	17.4967	0.338233	0.336221	1.00599	0.314422	0.410498
WBGene00001959	1.48218	0.836878	1.12772	0.7421	0.458027	0.553313
WBGene00001960	9.6266	-0.148702	0.59281	-0.250843	0.801935	0.851479
WBGene00001961	1.26618	1.90951	1.17681	1.62262	0.10467	0.168073
WBGene00001962	1.91656	1.95952	0.95821	2.04498	0.0408567	0.0762824
WBGene00001963	6.7396	-0.440972	0.480516	-0.917706	0.358773	0.456183
WBGene00001964	14.1139	-1.04322	0.397093	-2.62714	0.00861066	0.0197162
WBGene00001965	1.15414	-0.791089	1.24775	-0.634011	0.526074	0.617019
WBGene00001966	6.72565	-0.806828	0.586207	-1.37635	0.168712	0.248901
WBGene00001967	1.1712	-0.186853	1.03839	-0.179946	0.857195	0.894449
WBGene00001968	1.32913	-1.22259	0.997153	-1.22608	0.220168	0.308916
WBGene00001971	5228.88	0.0230021	0.0896772	0.256499	0.797565	0.848887
WBGene00001972	742.129	-0.00544487	0.102425	-0.0531598	0.957605	0.969671
WBGene00001973	1594.02	-0.569788	0.119627	-4.76303	1.90711e-06	1.04202e-05
WBGene00001974	923.139	-0.604185	0.109551	-5.51511	3.48563e-08	2.59053e-07
WBGene00001975	215.938	-0.436895	0.109598	-3.98633	6.71025e-05	0.000264369
WBGene00001976	472.21	0.534724	0.259595	2.05984	0.0394142	0.0739886
WBGene00001977	977.342	-0.661194	0.146205	-4.52238	6.1148e-06	3.02033e-05
WBGene00001978	2623.82	-0.229601	0.106182	-2.16234	0.0305921	0.059417
WBGene00001979	1015.34	-0.329482	0.0757023	-4.35233	1.34695e-05	6.18769e-05
WBGene00001980	2749.5	0.127521	0.0867867	1.46936	0.141736	0.215328
WBGene00001981	25.7655	-0.16444	0.312538	-0.526143	0.598789	0.682651
WBGene00001983	2064.97	0.470562	0.136821	3.43926	0.000583313	0.0018348
WBGene00001984	4.08615	1.96277	0.790096	2.48422	0.0129836	0.028269
WBGene00001985	255.807	-0.637184	0.107962	-5.90194	3.59246e-09	3.19461e-08
WBGene00001986	20.3259	0.428228	0.307792	1.39129	0.164137	0.243418
WBGene00001987	16.9808	1.88033	0.398898	4.71381	2.43128e-06	1.29661e-05
WBGene00001988	3.90317	0.94066	0.725169	1.29716	0.194577	0.279562
WBGene00001989	12.2461	1.66305	0.404066	4.11578	3.85864e-05	0.000159746
WBGene00001990	6.39969	2.19859	0.68538	3.20784	0.00133737	0.00384833
WBGene00001991	10.986	1.42673	0.513979	2.77586	0.00550558	0.0133535
WBGene00001992	2.57418	0.30066	0.93185	0.322648	0.746962	0.806539
WBGene00001993	799.296	0.25058	0.148582	1.68648	0.0917036	0.150662
WBGene00001994	1883.2	0.345402	0.150487	2.29522	0.0217203	0.0440894
WBGene00001995	63.9069	-0.105317	0.19032	-0.553371	0.58001	0.666292
WBGene00001996	262.497	-0.577314	0.138497	-4.16843	3.06699e-05	0.000129937
WBGene00001997	30.4598	-1.02409	0.290455	-3.52581	0.000422188	0.00138003
WBGene00001998	258.194	-0.805609	0.12028	-6.69778	2.11614e-11	2.64315e-10
WBGene00001999	2460.5	-0.42272	0.0810256	-5.21712	1.81731e-07	1.21147e-06
WBGene00002000	2831	-0.464153	0.17523	-2.64882	0.0080774	0.0186627
WBGene00002001	1035.74	0.257633	0.100242	2.5701	0.0101668	0.022753
WBGene00002002	244.483	-0.456512	0.126292	-3.61474	0.00030065	0.00101969
WBGene00002003	607.608	-0.492069	0.141992	-3.46546	0.000529326	0.00168486
WBGene00002004	1032.93	-0.494298	0.159993	-3.08949	0.00200501	0.0055126
WBGene00002005	19037.9	-0.811312	0.145325	-5.58274	2.36759e-08	1.81715e-07
WBGene00002006	2.76113	-0.326062	0.660204	-0.49388	0.621391	0.702167
WBGene00002007	7170.72	0.179024	0.104855	1.70736	0.0877559	0.145316
WBGene00002008	1136.5	-0.738846	0.151856	-4.86545	1.14197e-06	6.49357e-06
WBGene00002010	4072.72	-0.474562	0.135918	-3.49154	0.000480253	0.00154656
WBGene00002011	102.067	1.42369	0.362326	3.92931	8.51892e-05	0.00032907
WBGene00002012	14.1631	1.08942	0.655408	1.6622	0.0964717	0.156798
WBGene00002013	44.1512	3.49722	0.494149	7.07726	1.47036e-12	2.11679e-11
WBGene00002015	22.1288	0.825814	0.527308	1.56609	0.117327	0.184492
WBGene00002016	48.9477	1.52768	0.807094	1.89281	0.0583828	0.103005
WBGene00002017	129.795	1.17768	0.658232	1.78915	0.0735904	0.125193
WBGene00002018	40.192	0.970533	0.747962	1.29757	0.194435	0.279404
WBGene00002019	262.738	0.89685	0.637555	1.4067	0.159516	0.237687
WBGene00002020	48.2888	0.966027	0.720839	1.34014	0.180199	0.262309
WBGene00002021	275.172	2.40017	0.234295	10.2442	1.25633e-24	5.28953e-23
WBGene00002023	278.726	0.701679	0.178475	3.93153	8.44057e-05	0.00032633
WBGene00002024	172.742	-0.832896	0.186666	-4.46196	8.12135e-06	3.89555e-05
WBGene00002025	1463.81	-1.64302	0.156877	-10.4733	1.14573e-25	5.18348e-24
WBGene00002026	27.3511	0.740826	0.882265	0.839686	0.401084	0.498654
WBGene00002027	5439.52	-0.608724	0.148725	-4.09295	4.25917e-05	0.000174644
WBGene00002028	696.871	-0.663418	0.136723	-4.85228	1.22053e-06	6.89569e-06
WBGene00002029	82.6017	-0.671432	0.169584	-3.95928	7.51746e-05	0.000293673
WBGene00002030	6.78549	0.884929	0.462536	1.91321	0.0557209	0.0990679
WBGene00002031	51.9724	-0.277472	0.197099	-1.40778	0.159197	0.237372
WBGene00002032	544.72	-0.451184	0.124686	-3.61857	0.000296238	0.00100596
WBGene00002033	433.003	-0.378035	0.102407	-3.6915	0.000222936	0.000784535
WBGene00002034	507.444	-0.492892	0.0998258	-4.93753	7.912e-07	4.6523e-06
WBGene00002035	1358.54	0.24647	0.15165	1.62526	0.104107	0.167353
WBGene00002036	2899.75	0.217053	0.121176	1.79123	0.0732572	0.124843
WBGene00002037	321.421	1.53249	0.239707	6.39315	1.62503e-10	1.80434e-09
WBGene00002038	554.811	1.59723	0.109329	14.6094	2.4467e-48	2.99024e-46
WBGene00002039	417.585	2.31602	0.355496	6.51491	7.27321e-11	8.42901e-10
WBGene00002040	83.2676	0.550382	0.176028	3.12667	0.001768	0.00493497
WBGene00002041	476.401	2.52491	0.140761	17.9375	6.00555e-72	1.48862e-69
WBGene00002042	151.168	-0.807993	0.164281	-4.91835	8.72749e-07	5.08159e-06
WBGene00002043	462.786	0.104017	0.104107	0.999139	0.317727	0.414168
WBGene00002044	225.484	-0.493555	0.152993	-3.22599	0.00125537	0.00363796
WBGene00002045	2643.86	-0.444602	0.0904745	-4.91411	8.9186e-07	5.18186e-06
WBGene00002046	107.541	-0.457578	0.166373	-2.75032	0.00595371	0.0142868
WBGene00002047	648.251	-0.464758	0.103807	-4.47715	7.56449e-06	3.65735e-05
WBGene00002048	381.096	1.69407	0.180429	9.38916	6.04799e-21	1.97841e-19
WBGene00002050	257.407	0.95861	0.195701	4.89833	9.66539e-07	5.58075e-06
WBGene00002051	144.458	1.75461	0.695955	2.52115	0.0116971	0.0257226
WBGene00002052	157.302	-0.372297	0.23614	-1.5766	0.114888	0.181386
WBGene00002053	1211.67	-0.147294	0.136159	-1.08178	0.279351	0.372903
WBGene00002054	1776.04	2.50906	0.159788	15.7025	1.45492e-55	2.30677e-53
WBGene00002055	119.076	0.211442	0.227576	0.929106	0.352834	0.449999
WBGene00002056	2649.96	2.49648	0.143151	17.4394	4.14283e-68	9.0012e-66
WBGene00002057	63.3112	1.87474	0.348775	5.37521	7.64916e-08	5.40199e-07
WBGene00002058	242.215	3.73257	0.231711	16.1087	2.21524e-58	3.71295e-56
WBGene00002059	444.153	-0.556922	0.131002	-4.25124	2.12587e-05	9.34164e-05
WBGene00002060	37.8436	0.22164	0.242748	0.913047	0.361218	0.458465
WBGene00002061	862.202	-0.96665	0.13783	-7.01334	2.32702e-12	3.27102e-11
WBGene00002062	44.4806	0.337994	0.272048	1.24241	0.214087	0.302361
WBGene00002063	22.3192	-0.706394	0.313202	-2.2554	0.0241085	0.0483076
WBGene00002064	325.821	-0.733103	0.244233	-3.00165	0.00268522	0.0071353
WBGene00002065	2249.9	1.18553	0.117531	10.087	6.30954e-24	2.60051e-22
WBGene00002066	7581.82	-0.394192	0.149263	-2.64092	0.00826812	0.0190285
WBGene00002067	152.899	2.36822	0.388995	6.08807	1.14283e-09	1.12361e-08
WBGene00002068	1403.73	-0.351857	0.133757	-2.63057	0.00852406	0.0195307
WBGene00002069	75.9354	1.97353	0.349366	5.64889	1.61489e-08	1.27618e-07
WBGene00002070	1390.12	-0.451716	0.079855	-5.65671	1.54302e-08	1.22433e-07
WBGene00002071	180.55	-0.103644	0.159929	-0.648066	0.516942	0.608784
WBGene00002072	1893.56	-0.642949	0.094843	-6.77909	1.20933e-11	1.55691e-10
WBGene00002073	4829.09	-0.749924	0.178219	-4.20788	2.57776e-05	0.000111028
WBGene00002074	5217.88	-0.165573	0.177049	-0.935182	0.349695	0.446804
WBGene00002075	1826.21	-0.669488	0.176347	-3.79642	0.000146798	0.000538679
WBGene00002076	1803.7	-0.632112	0.117101	-5.39799	6.73915e-08	4.79977e-07
WBGene00002077	8350.52	-0.512109	0.155725	-3.28856	0.00100702	0.00298434
WBGene00002078	9088.49	-0.372847	0.171593	-2.17286	0.0297907	0.0580863
WBGene00002079	3348.55	-0.572261	0.14694	-3.89451	9.83961e-05	0.000375879
WBGene00002080	2451.91	-0.547531	0.186302	-2.93894	0.00329339	0.00851232
WBGene00002081	1389.94	0.830521	0.146523	5.66819	1.44317e-08	1.15133e-07
WBGene00002083	3051.46	-0.720729	0.123307	-5.84498	5.06633e-09	4.3836e-08
WBGene00002084	43.9867	1.53412	0.250611	6.12151	9.26941e-10	9.20093e-09
WBGene00002085	39.5608	0.753493	0.411613	1.83058	0.0671627	0.115837
WBGene00002086	6.18383	1.17747	0.498388	2.36256	0.0181494	0.037827
WBGene00002087	23.5739	2.51878	0.342966	7.3441	2.07144e-13	3.29316e-12
WBGene00002088	6.13951	0.945523	0.463878	2.0383	0.0415198	0.0773635
WBGene00002089	7.85975	0.273078	0.49676	0.549717	0.582513	0.668383
WBGene00002090	6.55286	2.00279	0.517424	3.87069	0.000108527	0.000409775
WBGene00002091	0	NA	NA	NA	NA	NA
WBGene00002092	0.969313	0.579068	1.24812	0.463953	0.642682	0.719638
WBGene00002093	2.0348	0.956187	0.909181	1.0517	0.292937	0.387478
WBGene00002094	33.1351	6.04399	0.638016	9.4731	2.71653e-21	9.10633e-20
WBGene00002095	0.670262	2.10088	1.40492	1.49537	0.134817	0.206767
WBGene00002096	0	NA	NA	NA	NA	NA
WBGene00002097	1.32239	1.7659	1.18312	1.49257	0.135549	0.207654
WBGene00002098	0.0812682	-0.677547	3.11654	-0.217404	0.827894	NA
WBGene00002099	1.87318	4.28542	1.16378	3.68234	0.000231106	0.000809079
WBGene00002100	83.4466	1.40376	0.193469	7.25572	3.99545e-13	6.20617e-12
WBGene00002101	1.93272	0.462869	1.04516	0.44287	0.65786	0.732777
WBGene00002102	4.68986	-3.1401	1.06848	-2.93885	0.00329428	0.00851336
WBGene00002103	5.94494	5.44201	0.937617	5.80408	6.47206e-09	5.52385e-08
WBGene00002104	0	NA	NA	NA	NA	NA
WBGene00002105	1.05974	1.91768	1.35122	1.41922	0.155836	0.232953
WBGene00002106	3.36413	1.58141	0.78941	2.00329	0.0451466	0.0830149
WBGene00002107	2.5537	-0.061028	0.738623	-0.082624	0.93415	0.95246
WBGene00002108	0.296094	1.73946	2.34484	0.741825	0.458194	NA
WBGene00002109	5.10179	-0.00966206	0.498212	-0.0193935	0.984527	0.988415
WBGene00002110	2.78628	-0.520034	0.745724	-0.697355	0.485581	0.57951
WBGene00002111	25.7915	1.47856	0.315525	4.68602	2.78566e-06	1.46825e-05
WBGene00002112	16.4287	-0.199182	0.336773	-0.591443	0.554223	0.643559
WBGene00002113	4.02561	-0.434198	0.59845	-0.725537	0.468123	0.562892
WBGene00002114	0.351398	-1.40123	1.96083	-0.714607	0.474852	NA
WBGene00002115	0.457683	0.771286	1.89401	0.407224	0.683843	NA
WBGene00002116	2.48226	0.259222	0.711979	0.364087	0.715793	0.780885
WBGene00002117	20.5946	1.15918	0.279804	4.14282	3.43066e-05	0.000143993
WBGene00002118	2.46064	-0.725337	0.784229	-0.924905	0.355016	0.452158
WBGene00002119	0.337835	-0.608698	2.34683	-0.25937	0.79535	NA
WBGene00002120	2.13039	1.44797	0.959864	1.50851	0.131423	0.202422
WBGene00002121	0.0596239	0.284238	3.11654	0.0912031	0.927331	NA
WBGene00002123	162.216	1.58665	0.253799	6.25161	4.06246e-10	4.26329e-09
WBGene00002124	406.002	-0.123882	0.199403	-0.621265	0.534426	0.624982
WBGene00002125	1219.99	-0.260214	0.133452	-1.94987	0.0511918	0.0923079
WBGene00002127	163.872	0.620214	0.271502	2.28438	0.0223492	0.0452201
WBGene00002128	51.2409	1.96526	0.451876	4.34911	1.36689e-05	6.27438e-05
WBGene00002129	253.385	0.405262	0.0960343	4.21997	2.44336e-05	0.000105731
WBGene00002130	481.425	-0.187231	0.0855381	-2.18885	0.0286074	0.0560024
WBGene00002131	167.678	-0.180573	0.139651	-1.29302	0.196003	0.281014
WBGene00002132	67.7936	1.0817	0.193876	5.57933	2.41448e-08	1.84669e-07
WBGene00002133	85.3955	-0.772501	0.153434	-5.03475	4.78472e-07	2.94737e-06
WBGene00002134	343.489	0.245671	0.177691	1.38257	0.166797	0.24647
WBGene00002135	294.081	0.304185	0.200508	1.51707	0.129248	0.19974
WBGene00002136	1891.22	-1.01656	0.199441	-5.09703	3.45017e-07	2.18888e-06
WBGene00002137	581.545	2.26242	0.172225	13.1365	2.03507e-39	1.81803e-37
WBGene00002138	233.284	1.93656	0.163853	11.8189	3.11667e-32	1.93135e-30
WBGene00002139	175.602	1.49421	0.151107	9.88845	4.67215e-23	1.7914e-21
WBGene00002140	10.8693	1.46248	0.398139	3.6733	0.000239441	0.000835268
WBGene00002141	17.9843	2.11023	0.461166	4.57586	4.74272e-06	2.38955e-05
WBGene00002142	8.29765	1.56951	0.578706	2.71211	0.00668569	0.0158275
WBGene00002143	281.822	-0.427218	0.140458	-3.04161	0.00235314	0.00634778
WBGene00002144	203	-0.860444	0.166473	-5.16867	2.3577e-07	1.53875e-06
WBGene00002146	98.6928	1.56679	0.173564	9.02716	1.76178e-19	5.13338e-18
WBGene00002147	1680.68	-0.296814	0.121649	-2.43992	0.0146903	0.031429
WBGene00002148	1187.29	-0.722752	0.120542	-5.99585	2.02429e-09	1.89196e-08
WBGene00002149	4.53685	2.15715	0.650706	3.31509	0.000916145	0.00274018
WBGene00002150	5.29149	0.247765	0.617514	0.40123	0.68825	0.757648
WBGene00002151	19.9998	-0.104509	0.325978	-0.320602	0.748512	0.807817
WBGene00002152	3030.67	0.391945	0.111473	3.51605	0.000438022	0.00142649
WBGene00002153	1410.37	-0.713756	0.176542	-4.04297	5.27774e-05	0.000212013
WBGene00002162	599.661	-0.152225	0.160908	-0.946037	0.34413	0.441151
WBGene00002163	38.0897	1.32678	0.258579	5.13104	2.88148e-07	1.8501e-06
WBGene00002169	2672.28	-0.678318	0.104209	-6.50922	7.55444e-11	8.741e-10
WBGene00002173	1393.9	0.985703	0.131319	7.50619	6.08725e-14	1.01931e-12
WBGene00002174	569.894	2.61924	0.172165	15.2135	2.87561e-52	4.08128e-50
WBGene00002175	192.254	0.649201	0.148458	4.37297	1.22568e-05	5.68101e-05
WBGene00002176	14.9067	1.17729	0.312431	3.76815	0.000164462	0.000597268
WBGene00002177	10.5023	2.67841	0.525555	5.09635	3.46257e-07	2.19516e-06
WBGene00002178	44.0911	1.49622	0.349884	4.27633	1.89995e-05	8.43523e-05
WBGene00002179	274.824	1.04893	0.163583	6.41219	1.43443e-10	1.60385e-09
WBGene00002180	164.883	-0.217663	0.138179	-1.57522	0.115205	0.181789
WBGene00002181	278.074	0.564058	0.251695	2.24103	0.0250238	0.0499143
WBGene00002182	22.8961	0.911198	0.351423	2.59288	0.00951758	0.0214855
WBGene00002183	554.212	-1.23046	0.182103	-6.75696	1.40914e-11	1.79725e-10
WBGene00002184	17.2701	1.61585	0.351464	4.59749	4.27613e-06	2.17063e-05
WBGene00002185	445.544	-0.160639	0.176342	-0.910952	0.36232	0.459533
WBGene00002186	3.63604	2.85206	0.813591	3.50553	0.000455706	0.00147697
WBGene00002187	417.13	1.44486	0.181077	7.97924	1.47239e-15	2.95132e-14
WBGene00002188	18.8175	1.92044	0.47282	4.06168	4.87217e-05	0.000197434
WBGene00002189	464.311	1.27202	0.125253	10.1556	3.12836e-24	1.30156e-22
WBGene00002190	885.465	0.670567	0.109989	6.09667	1.08304e-09	1.06841e-08
WBGene00002191	2120.43	0.0229853	0.122944	0.186957	0.851694	0.890081
WBGene00002192	3483.3	-0.399151	0.165405	-2.41317	0.0158144	0.0335403
WBGene00002193	0.875177	3.1734	1.58419	2.00317	0.0451593	0.0830295
WBGene00002194	1.48414	1.53313	1.22534	1.25119	0.210864	0.298551
WBGene00002195	8.82225	1.96286	0.484483	4.05146	5.08997e-05	0.000205126
WBGene00002196	1600.78	-0.0718201	0.0908706	-0.790356	0.42932	0.525973
WBGene00002198	14.3478	1.21252	0.351171	3.45279	0.000554827	0.00175524
WBGene00002199	9.46324	-1.5473	0.467695	-3.30836	0.000938443	0.00280211
WBGene00002200	18.2074	0.109802	0.31136	0.352651	0.72435	0.788042
WBGene00002201	3046.99	-0.29033	0.162227	-1.78966	0.0735093	0.125133
WBGene00002202	3100.78	0.0559642	0.110875	0.50475	0.613734	0.695499
WBGene00002203	682.129	0.763825	0.131002	5.83065	5.52131e-09	4.75389e-08
WBGene00002204	0.142122	0.765132	3.11654	0.245507	0.806064	NA
WBGene00002205	2.485	1.00211	0.81154	1.23482	0.216896	0.305495
WBGene00002206	0.555011	2.49121	2.06475	1.20654	0.227608	0.31708
WBGene00002207	425.382	0.669306	0.0897223	7.45975	8.66843e-14	1.44056e-12
WBGene00002208	0.502196	-0.222231	1.91776	-0.115881	0.907747	NA
WBGene00002210	299.686	1.14278	0.159647	7.15816	8.17682e-13	1.22576e-11
WBGene00002211	15.993	1.15178	0.366019	3.14678	0.00165081	0.00464694
WBGene00002212	4.9846	0.612328	0.554534	1.10422	0.269498	0.362412
WBGene00002213	147.888	0.639279	0.219218	2.91618	0.00354348	0.00907871
WBGene00002214	797.03	-1.13383	0.133739	-8.47792	2.29264e-17	5.54995e-16
WBGene00002215	503.155	0.710716	0.161523	4.40008	1.08209e-05	5.07697e-05
WBGene00002216	98.9184	0.195544	0.187897	1.0407	0.298016	0.392953
WBGene00002217	296.845	2.05384	0.144642	14.1995	9.22803e-46	1.04777e-43
WBGene00002218	3.23482	1.6761	0.764338	2.19287	0.0283164	0.0555316
WBGene00002219	765.491	-0.178815	0.11504	-1.55438	0.120095	0.188054
WBGene00002220	78.4751	0.225131	0.172852	1.30244	0.192765	0.277242
WBGene00002221	609.88	-0.612678	0.134335	-4.56084	5.09498e-06	2.55169e-05
WBGene00002222	204.726	1.55448	0.33155	4.68851	2.75196e-06	1.45222e-05
WBGene00002223	971.59	-0.110688	0.0858676	-1.28905	0.19738	0.28261
WBGene00002224	3.78978	0.0200178	0.590164	0.0339191	0.972942	0.980516
WBGene00002225	810.018	-0.683905	0.131127	-5.21561	1.83213e-07	1.22043e-06
WBGene00002226	672.103	-0.794544	0.130133	-6.10561	1.02407e-09	1.01307e-08
WBGene00002227	4.05655	0.511309	0.557992	0.916337	0.35949	0.456667
WBGene00002228	958.68	-0.580195	0.101282	-5.72848	1.01333e-08	8.3179e-08
WBGene00002229	2087.47	-0.693519	0.114464	-6.05886	1.37094e-09	1.32131e-08
WBGene00002230	25.5004	0.347279	0.337249	1.02974	0.303132	0.398114
WBGene00002231	1748.04	-0.730664	0.1065	-6.8607	6.85238e-12	9.11527e-11
WBGene00002232	205.34	0.903714	0.222342	4.06452	4.81305e-05	0.000195263
WBGene00002233	35.6465	0.459252	0.272228	1.68701	0.0916009	0.150564
WBGene00002234	138.479	1.70237	0.1912	8.9036	5.40641e-19	1.50075e-17
WBGene00002235	23.8797	1.14022	0.260713	4.37347	1.22288e-05	5.66953e-05
WBGene00002238	4610	-0.369734	0.103324	-3.5784	0.000345704	0.00115468
WBGene00002239	83.8775	0.459688	0.165607	2.77578	0.005507	0.0133551
WBGene00002240	647.904	-0.426669	0.159258	-2.67911	0.00738185	0.0172436
WBGene00002241	202.337	-0.363747	0.170035	-2.13925	0.0324155	0.0624911
WBGene00002242	17.2995	0.80617	0.329914	2.44357	0.0145426	0.031166
WBGene00002243	35.8007	1.78346	0.377447	4.72507	2.30035e-06	1.23464e-05
WBGene00002244	2044.96	-0.41343	0.146645	-2.81927	0.00481335	0.0118647
WBGene00002245	1730.33	-0.442741	0.15367	-2.88112	0.00396267	0.0100113
WBGene00002246	9.12521	-0.464409	0.452872	-1.02548	0.305139	0.400339
WBGene00002247	2616.5	-0.158827	0.137439	-1.15562	0.247837	0.339218
WBGene00002248	1435.91	0.821953	0.331277	2.48116	0.0130954	0.0284631
WBGene00002249	978.036	0.269479	0.120861	2.22966	0.0257697	0.0512338
WBGene00002250	2686.29	-0.143447	0.143751	-0.997884	0.318336	0.414759
WBGene00002251	3634.56	-0.123783	0.0937552	-1.32027	0.186744	0.270316
WBGene00002252	26.2972	1.16091	0.284473	4.08092	4.48576e-05	0.000183087
WBGene00002253	712.955	0.434932	0.213059	2.04136	0.0412147	0.0768691
WBGene00002254	531.504	-1.16617	0.132973	-8.76994	1.78764e-18	4.73806e-17
WBGene00002255	138.454	-1.15828	0.272913	-4.24414	2.19437e-05	9.5982e-05
WBGene00002256	78.7418	-0.955521	0.183761	-5.19981	1.99489e-07	1.32084e-06
WBGene00002257	91.9983	0.476935	0.223006	2.13867	0.0324624	0.0625539
WBGene00002258	524.187	-1.83447	0.149838	-12.243	1.83104e-34	1.23465e-32
WBGene00002259	71.6561	1.04815	0.301452	3.47699	0.000507077	0.0016202
WBGene00002260	2.05046	-3.52407	1.05107	-3.35283	0.000799905	0.00242925
WBGene00002261	402.573	0.713657	0.227952	3.13073	0.00174373	0.00487805
WBGene00002262	298.829	-0.900521	0.150846	-5.96982	2.37509e-09	2.19419e-08
WBGene00002263	2861.99	0.764415	0.312948	2.44263	0.0145807	0.0312324
WBGene00002264	2838.72	0.290278	0.085336	3.4016	0.000669938	0.00207867
WBGene00002265	9637.27	3.0565	0.157685	19.3835	1.06282e-83	3.52916e-81
WBGene00002266	132.751	1.60071	0.267069	5.99364	2.05201e-09	1.91481e-08
WBGene00002267	266.162	-0.941806	0.142984	-6.58679	4.49436e-11	5.36245e-10
WBGene00002268	185.193	-0.707096	0.225399	-3.13708	0.00170638	0.00478498
WBGene00002269	4958.72	2.4808	0.122379	20.2714	2.30109e-91	1.01242e-88
WBGene00002270	2.96144	1.90939	0.810512	2.35579	0.0184835	0.0384277
WBGene00002271	863.377	1.85782	0.29264	6.34847	2.17465e-10	2.36536e-09
WBGene00002272	584.183	2.33213	0.16608	14.0422	8.59759e-45	9.34006e-43
WBGene00002273	837.573	2.732	0.135312	20.1904	1.18879e-90	4.86548e-88
WBGene00002274	150.355	3.48543	0.194818	17.8907	1.39396e-71	3.40726e-69
WBGene00002275	901.804	-0.173107	0.155691	-1.11186	0.266197	0.359098
WBGene00002276	507.893	-0.613034	0.101366	-6.04771	1.46923e-09	1.40451e-08
WBGene00002280	4105.7	0.107579	0.117251	0.917512	0.358874	0.456186
WBGene00002282	187.151	1.16379	0.387674	3.00198	0.00268231	0.00712936
WBGene00002285	0.671713	0.459777	1.83358	0.250754	0.802004	0.8515
WBGene00002295	1474.13	0.0518759	0.0919148	0.564391	0.572488	0.659804
WBGene00002297	1997.62	-0.510923	0.158126	-3.23111	0.00123312	0.00358232
WBGene00002299	368.968	1.49938	0.175789	8.52939	1.47123e-17	3.58617e-16
WBGene00002324	150.162	-0.78453	0.145886	-5.37771	7.54382e-08	5.33187e-07
WBGene00002335	1585.44	-0.0785736	0.140313	-0.559989	0.575487	0.662134
WBGene00002344	5021.41	-0.28356	0.175249	-1.61804	0.105655	0.169331
WBGene00002348	3290.51	1.15439	0.174351	6.62109	3.56569e-11	4.31883e-10
WBGene00002363	4164.39	-0.329668	0.170294	-1.93587	0.0528831	0.0947942
WBGene00002368	1174.71	-0.646828	0.125881	-5.13843	2.77048e-07	1.78665e-06
WBGene00002393	8.05422	2.25042	0.527134	4.26917	1.96204e-05	8.69115e-05
WBGene00002497	237.296	0.302264	0.22089	1.36839	0.17119	0.251694
WBGene00002583	3340.64	-0.238184	0.14118	-1.6871	0.0915849	0.150551
WBGene00002601	6.36374	0.515739	0.643878	0.800989	0.423138	0.519629
WBGene00002632	785.36	0.57188	0.127733	4.47717	7.56389e-06	3.65735e-05
WBGene00002637	3941.22	-0.32941	0.082589	-3.98854	6.64808e-05	0.000262037
WBGene00002694	2632.31	-0.101717	0.127152	-0.799964	0.423731	0.520249
WBGene00002696	456.666	-0.417598	0.134949	-3.09449	0.00197152	0.0054341
WBGene00002717	4087.93	0.050122	0.119198	0.420495	0.674124	0.746263
WBGene00002783	2261.15	0.513706	0.116777	4.39904	1.08731e-05	5.09874e-05
WBGene00002827	67.4849	0.57909	0.323243	1.7915	0.0732127	0.124779
WBGene00002845	17068.9	-0.424473	0.164065	-2.58723	0.00967505	0.0218062
WBGene00002850	2686.67	-0.226904	0.128434	-1.7667	0.0772785	0.130495
WBGene00002855	1871.56	-0.312611	0.0994921	-3.14207	0.00167758	0.00471174
WBGene00002879	333.706	-0.773194	0.133209	-5.80438	6.46031e-09	5.5165e-08
WBGene00002881	86.0692	1.74133	0.164834	10.5641	4.37119e-26	2.03515e-24
WBGene00002889	3892.92	-0.222468	0.160553	-1.38564	0.165858	0.245534
WBGene00002891	1711.2	-0.416208	0.134757	-3.08858	0.00201113	0.0055277
WBGene00002915	1843.72	1.35238	0.157237	8.60089	7.90975e-18	1.98014e-16
WBGene00002957	1003.2	-0.125143	0.104269	-1.2002	0.230062	0.319689
WBGene00002974	30.7099	1.17198	0.225047	5.20773	1.91165e-07	1.26955e-06
WBGene00002975	8.91757	1.00944	0.447409	2.25618	0.0240593	0.0482145
WBGene00002976	7.3767	0.904596	0.474028	1.90832	0.05635	0.10001
WBGene00002977	91.1305	1.05015	0.16722	6.28005	3.38473e-10	3.58627e-09
WBGene00002978	2855.04	-0.0593851	0.120206	-0.494029	0.621286	0.702167
WBGene00002979	271.805	1.5556	0.129201	12.0401	2.18689e-33	1.41497e-31
WBGene00002980	3763.17	0.697173	0.122344	5.69848	1.2088e-08	9.78547e-08
WBGene00002981	1517.24	0.640739	0.112421	5.69949	1.20169e-08	9.7414e-08
WBGene00002982	21.29	-0.392841	0.334925	-1.17292	0.240828	0.331767
WBGene00002983	103.939	2.36006	0.68655	3.43757	0.000586957	0.00184495
WBGene00002985	2241.69	-0.521957	0.0913278	-5.7152	1.09574e-08	8.94843e-08
WBGene00002986	337.822	0.0337083	0.103244	0.326492	0.744052	0.804533
WBGene00002987	9.67325	1.3559	0.633284	2.14106	0.0322692	0.0622908
WBGene00002988	6.98884	1.38746	0.496853	2.79249	0.00523039	0.0127664
WBGene00002989	70.5275	1.35703	0.294748	4.60402	4.14407e-06	2.11151e-05
WBGene00002990	192.827	2.06509	0.167597	12.3218	6.91356e-35	4.84748e-33
WBGene00002991	115.377	1.02348	0.187187	5.46771	4.55894e-08	3.33886e-07
WBGene00002992	300.468	-0.892384	0.153566	-5.81108	6.20718e-09	5.30807e-08
WBGene00002993	0	NA	NA	NA	NA	NA
WBGene00002994	1513.14	-0.442771	0.0981645	-4.5105	6.46747e-06	3.17315e-05
WBGene00002996	184.697	-0.465951	0.133003	-3.5033	0.000459525	0.00148743
WBGene00002997	66.6871	-0.107179	0.15222	-0.704107	0.481366	0.575397
WBGene00002998	738.373	-0.679838	0.0952395	-7.1382	9.45634e-13	1.40322e-11
WBGene00002999	405.693	0.582535	0.0969989	6.00558	1.9065e-09	1.78661e-08
WBGene00003000	27.6348	1.20939	0.294791	4.10252	4.08667e-05	0.000168276
WBGene00003001	207.957	-0.0187673	0.158069	-0.118729	0.90549	0.930988
WBGene00003002	3089.57	-0.415762	0.109903	-3.78299	0.000154957	0.000566019
WBGene00003003	143.79	2.07997	0.292736	7.10527	1.20087e-12	1.75825e-11
WBGene00003006	81.4038	0.742405	0.24506	3.02948	0.00244971	0.00658106
WBGene00003007	44.867	1.01382	0.226241	4.48116	7.42393e-06	3.59531e-05
WBGene00003008	2.97472	0.748751	0.730215	1.02538	0.305182	0.400365
WBGene00003009	1672.7	-0.274546	0.136821	-2.0066	0.044792	0.0825008
WBGene00003010	216.546	0.182796	0.107094	1.70687	0.0878456	0.145423
WBGene00003011	404.448	-0.0930448	0.108378	-0.85852	0.390606	0.487571
WBGene00003012	1058.29	-0.176902	0.0635479	-2.78376	0.00537327	0.0130668
WBGene00003014	423.714	-0.115895	0.0986232	-1.17512	0.239945	0.330874
WBGene00003015	6.69769	0.646896	0.476619	1.35726	0.174698	0.255907
WBGene00003017	23.2542	-0.147473	0.264638	-0.557261	0.577349	0.663929
WBGene00003018	6.79154	0.507835	0.552244	0.919585	0.35779	0.455131
WBGene00003019	81.4062	0.368764	0.238845	1.54394	0.122602	0.191266
WBGene00003020	1314.6	-0.643363	0.0923798	-6.96432	3.29998e-12	4.57294e-11
WBGene00003021	1033.17	-0.465533	0.0898148	-5.18325	2.1805e-07	1.43564e-06
WBGene00003022	261.072	-0.474039	0.136102	-3.48297	0.000495892	0.00158917
WBGene00003024	108.546	0.642344	0.174552	3.67995	0.000233277	0.000815706
WBGene00003025	992.362	-0.123886	0.0966298	-1.28207	0.199819	0.285487
WBGene00003026	4109.98	-0.896196	0.189548	-4.72807	2.26667e-06	1.21842e-05
WBGene00003029	7.11644	1.24733	0.648476	1.92348	0.0544198	0.0971136
WBGene00003030	1490.29	-0.48544	0.170678	-2.84418	0.00445258	0.0110715
WBGene00003031	11.1554	-0.531221	0.350504	-1.51559	0.129622	0.200265
WBGene00003033	4.64661	0.876641	0.715445	1.22531	0.220459	0.309127
WBGene00003034	1277.65	-0.116561	0.0881294	-1.32261	0.185966	0.269373
WBGene00003035	39.8087	-0.353758	0.212664	-1.66346	0.0962213	0.156484
WBGene00003036	2542.6	-0.495554	0.0887746	-5.58216	2.37549e-08	1.82162e-07
WBGene00003037	396.655	-0.6124	0.123493	-4.95898	7.08644e-07	4.21759e-06
WBGene00003038	185.295	-0.541679	0.141243	-3.83508	0.000125521	0.000467545
WBGene00003039	0.241502	0.284241	2.99736	0.0948307	0.924449	NA
WBGene00003040	1629.69	0.436822	0.117037	3.73235	0.0001897	0.000679531
WBGene00003041	668.11	-0.680267	0.0878048	-7.74749	9.37251e-15	1.76225e-13
WBGene00003043	493.002	-0.448917	0.122585	-3.66209	0.000250163	0.000867512
WBGene00003044	347.956	-0.0977513	0.111898	-0.873574	0.38235	0.479067
WBGene00003045	123.118	-0.197274	0.156472	-1.26076	0.207394	0.294434
WBGene00003046	8.81516	-0.321528	0.466125	-0.689789	0.490327	0.583689
WBGene00003047	675.492	-0.145768	0.161204	-0.904241	0.365868	0.462964
WBGene00003048	1725.3	0.215126	0.134193	1.6031	0.108912	0.173568
WBGene00003052	5259.54	-0.370264	0.101651	-3.6425	0.000270007	0.000926648
WBGene00003053	925.797	0.358724	0.135881	2.63998	0.00829114	0.0190765
WBGene00003055	273.708	0.000942008	0.272524	0.0034566	0.997242	0.998094
WBGene00003056	321.883	1.03409	0.105425	9.80875	1.0324e-22	3.88232e-21
WBGene00003057	14.457	0.76584	0.485557	1.57724	0.11474	0.181235
WBGene00003058	0.282634	1.63931	2.3861	0.687026	0.492066	NA
WBGene00003059	123.007	-0.282088	0.169215	-1.66704	0.0955073	0.15559
WBGene00003060	1206.78	0.027517	0.14824	0.185625	0.852739	0.890697
WBGene00003061	213.49	-0.585524	0.213652	-2.74055	0.00613366	0.0146567
WBGene00003062	458.605	-0.0271453	0.120518	-0.225238	0.821794	0.867297
WBGene00003063	829.274	0.744218	0.151205	4.92191	8.57042e-07	4.99953e-06
WBGene00003064	305.795	-0.514328	0.12398	-4.14847	3.34705e-05	0.000140786
WBGene00003065	434.837	-0.270937	0.148146	-1.82885	0.0674217	0.116249
WBGene00003066	278.887	-0.166686	0.136871	-1.21783	0.223287	0.312223
WBGene00003067	121.115	-0.121763	0.197875	-0.615353	0.538322	0.628786
WBGene00003068	863.641	0.241835	0.111794	2.16322	0.0305241	0.0593002
WBGene00003071	1964.38	0.676786	0.177979	3.80261	0.000143179	0.000526716
WBGene00003072	1538.29	0.142025	0.119509	1.18841	0.234673	0.324865
WBGene00003073	4449.14	0.505658	0.140122	3.60869	0.000307748	0.00104135
WBGene00003074	361.667	-0.249472	0.106027	-2.35291	0.0186273	0.0386536
WBGene00003075	11.4173	1.99794	0.576805	3.4638	0.000532602	0.00169437
WBGene00003076	109.705	-0.777001	0.243123	-3.19592	0.00139388	0.00399399
WBGene00003077	82.578	-0.553655	0.166917	-3.31694	0.000910091	0.00272346
WBGene00003078	3.29965	-1.00015	0.636992	-1.57012	0.116387	0.18326
WBGene00003079	175.271	-0.36188	0.195502	-1.85102	0.0641661	0.111543
WBGene00003080	47.3569	-0.757967	0.259766	-2.91788	0.00352422	0.00903464
WBGene00003081	24.0898	-0.372411	0.40076	-0.929261	0.352754	0.449928
WBGene00003082	146.989	-0.870816	0.182786	-4.76413	1.89666e-06	1.03727e-05
WBGene00003083	722.122	-0.671221	0.113419	-5.91808	3.25716e-09	2.91868e-08
WBGene00003084	402.23	0.373753	0.125766	2.97181	0.00296054	0.00776375
WBGene00003085	6122.25	-0.591508	0.162254	-3.64557	0.000266805	0.000916553
WBGene00003086	625.936	0.150591	0.0899874	1.67347	0.0942355	0.153908
WBGene00003087	92.8149	-0.280875	0.155759	-1.80327	0.0713461	0.122059
WBGene00003088	0.116439	0.765132	3.11654	0.245507	0.806064	NA
WBGene00003089	113.341	1.28131	0.345869	3.70462	0.000211712	0.000748627
WBGene00003090	10141.3	3.44334	0.135208	25.4671	4.57034e-143	3.83017e-140
WBGene00003091	19915.2	5.27407	0.139628	37.7722	0	0
WBGene00003092	43.6082	2.98735	0.424602	7.03564	1.98353e-12	2.81517e-11
WBGene00003093	414.582	-3.86451	0.576748	-6.70052	2.07673e-11	2.59761e-10
WBGene00003094	3.68741	-1.79848	0.794357	-2.26407	0.0235697	0.047325
WBGene00003095	5.14462	-4.07844	0.845703	-4.82254	1.41743e-06	7.90661e-06
WBGene00003096	347.561	-2.09724	0.362878	-5.77946	7.49386e-09	6.31933e-08
WBGene00003097	651.596	-0.00834411	0.19105	-0.0436749	0.965164	0.975193
WBGene00003098	0.579027	1.92407	1.6284	1.18158	0.237374	0.327882
WBGene00003099	2.54161	-3.91986	1.2587	-3.11422	0.00184432	0.00512526
WBGene00003100	3.20827	-0.420532	0.674172	-0.623775	0.532775	0.623342
WBGene00003102	19.8233	0.837258	0.337267	2.48248	0.0130473	0.0283831
WBGene00003104	30.2626	1.72338	0.512415	3.36324	0.000770322	0.00234589
WBGene00003106	3.90264	0.881425	0.577017	1.52755	0.126623	0.196356
WBGene00003107	166.247	0.0559506	0.200985	0.278382	0.780719	0.834794
WBGene00003111	363.2	0.179344	0.141406	1.26829	0.204693	0.291173
WBGene00003112	52.6416	0.879571	0.263576	3.33706	0.000846683	0.00255292
WBGene00003114	0.368608	-1.25863	2.27824	-0.552457	0.580636	NA
WBGene00003119	294.33	0.214753	0.114461	1.87622	0.0606253	0.106418
WBGene00003123	722.447	-0.453033	0.178497	-2.53804	0.0111474	0.0246554
WBGene00003124	45.9564	-0.232927	0.300621	-0.77482	0.438446	0.534882
WBGene00003129	90.9344	-0.413654	0.178862	-2.3127	0.0207394	0.0423572
[truncated: 44,749 more rows]

## Sheet: anti-sense_small_RNA_results_df
	baseMean	log2FoldChange	lfcSE	stat	pvalue	padj
WBGene00000001	319.697	-0.0474146	0.0978615	-0.484507	0.628026	0.714888
WBGene00000002	1.90955	1.49275	0.926781	1.61068	0.10725	0.181459
WBGene00000003	1.46417	1.51562	0.975083	1.55435	0.120102	0.198676
WBGene00000004	9.51143	0.417146	0.37865	1.10167	0.270607	0.374969
WBGene00000005	6.5137	-0.135515	0.464395	-0.291809	0.770432	0.830851
WBGene00000006	4.39897	0.374756	0.537336	0.697435	0.485531	0.588329
WBGene00000007	7.95086	1.56468	0.516587	3.02887	0.00245467	0.00813493
WBGene00000008	1.81455	0.213548	0.939141	0.227386	0.820124	0.869227
WBGene00000009	2.22246	1.18213	0.768721	1.53778	0.124102	0.203814
WBGene00000010	119.206	0.118143	0.128225	0.921371	0.356857	0.464587
WBGene00000012	0.126736	0.420736	3.11654	0.135001	0.892611	NA
WBGene00000013	0	NA	NA	NA	NA	NA
WBGene00000014	0.163481	0.901628	3.11654	0.289304	0.772349	NA
WBGene00000015	0.0715406	0.901628	3.11654	0.289304	0.772349	NA
WBGene00000016	0.424691	0.408858	1.83283	0.223074	0.823478	NA
WBGene00000017	0.498504	1.67612	2.05912	0.814001	0.415645	NA
WBGene00000018	22.3913	-0.608193	0.267884	-2.27036	0.0231859	0.0532856
WBGene00000019	47.4847	0.814124	0.294161	2.76761	0.00564689	0.0164667
WBGene00000020	29.0415	1.51499	0.280476	5.40148	6.61e-08	9.71e-07
WBGene00000021	11.4617	2.23579	0.404429	5.52826	3.23e-08	5.09e-07
WBGene00000022	30.5519	1.26062	0.372244	3.38653	0.000707814	0.00284636
WBGene00000023	22.8577	0.571023	0.339421	1.68234	0.0925023	0.161299
WBGene00000024	0.325115	0.425342	1.9013	0.223711	0.822982	NA
WBGene00000025	1.28586	2.07659	1.17116	1.7731	0.0762119	0.138436
WBGene00000026	0.285072	1.43239	2.64043	0.542482	0.587486	NA
WBGene00000027	0.183701	0.954022	3.00942	0.317012	0.751235	NA
WBGene00000028	1.52836	3.55272	1.4011	2.53567	0.0112232	0.0293553
WBGene00000029	0.91218	1.24481	1.30633	0.952903	0.340639	0.448871
WBGene00000030	1.73487	1.19466	0.904651	1.32057	0.186644	0.282256
WBGene00000031	4.80991	2.40117	0.727797	3.29923	0.000969491	0.00372367
WBGene00000032	0.364772	2.23266	3.0751	0.726045	0.467811	NA
WBGene00000033	2.22094	2.7551	1.0556	2.60997	0.00905498	0.0245277
WBGene00000034	1.4565	2.22131	1.20411	1.84477	0.0650715	0.122198
WBGene00000035	3.58372	2.01809	0.839448	2.40407	0.0162136	0.0397799
WBGene00000036	5.12479	1.39658	0.572674	2.4387	0.0147401	0.0367724
WBGene00000037	8.05761	0.926017	0.444176	2.0848	0.0370879	0.0779371
WBGene00000038	3.34769	-0.182402	0.632149	-0.288542	0.772932	0.83263
WBGene00000039	83.7574	0.914733	0.253975	3.60166	0.000316193	0.00143962
WBGene00000040	27.1296	-0.0391881	0.239692	-0.163493	0.87013	0.906586
WBGene00000041	482.168	-0.87455	0.113707	-7.69127	1.46e-14	9.61e-13
WBGene00000042	0.592431	2.2348	1.73598	1.28734	0.197976	NA
WBGene00000043	0.224465	0.87014	2.35727	0.36913	0.712031	NA
WBGene00000044	7.61894	-0.0833048	0.47301	-0.176116	0.860203	0.898392
WBGene00000045	25.9467	1.79802	0.39018	4.60819	4.06e-06	3.42e-05
WBGene00000046	15.5969	0.281704	0.283074	0.995159	0.319659	0.427317
WBGene00000047	0.912202	0.0391773	1.3492	0.0290374	0.976835	0.983595
WBGene00000048	46.6894	0.354821	0.244237	1.45277	0.146287	0.23289
WBGene00000049	0.499427	0.98697	1.57248	0.627653	0.530231	NA
WBGene00000050	8.85211	1.74574	0.421828	4.13852	3.5e-05	0.000220681
WBGene00000051	3.28345	1.76346	0.741267	2.37898	0.0173606	0.0420405
WBGene00000053	1.06787	1.05351	1.2254	0.85973	0.389938	0.497184
WBGene00000054	0.992109	1.82887	1.11602	1.63874	0.101267	0.17354
WBGene00000055	10.3804	0.88784	0.385032	2.30588	0.0211171	0.0493454
WBGene00000056	112.404	0.820252	0.138364	5.9282	3.06e-09	6.2e-08
WBGene00000057	10.3693	1.419	0.420835	3.37186	0.000746621	0.00297555
WBGene00000058	1.25989	0.860016	1.23018	0.6991	0.484489	0.587358
WBGene00000059	9.11036	0.951066	0.371267	2.56167	0.0104169	0.0275633
WBGene00000060	1.44898	1.09794	0.977572	1.12313	0.261381	0.365467
WBGene00000061	0.318875	-0.354563	1.91984	-0.184683	0.853478	NA
WBGene00000062	1.96731	-0.046266	0.892749	-0.0518243	0.958669	0.971057
WBGene00000063	43.1977	-0.327653	0.198303	-1.65228	0.0984765	0.169708
WBGene00000064	304.925	-0.396496	0.116404	-3.4062	0.00065875	0.00268153
WBGene00000065	215.17	-0.154264	0.11846	-1.30224	0.192834	0.289185
WBGene00000066	25.5582	-0.298494	0.231562	-1.28905	0.197381	0.29418
WBGene00000067	11.1628	1.12655	0.368379	3.05813	0.00222723	0.00750943
WBGene00000068	112.588	1.31794	0.171992	7.66281	1.82e-14	1.17e-12
WBGene00000069	7.72645	2.28878	0.466176	4.90969	9.12e-07	9.46e-06
WBGene00000070	17.9305	1.18457	0.436765	2.71215	0.00668475	0.01896
WBGene00000071	4.14483	1.01656	0.552595	1.83961	0.065825	0.123388
WBGene00000072	3.33534	1.19077	0.742863	1.60294	0.108947	0.183792
WBGene00000073	57.3772	-1.13415	0.18608	-6.09496	1.09e-09	2.51e-08
WBGene00000074	35.3905	-0.149905	0.228629	-0.65567	0.512037	0.612531
WBGene00000075	218.027	0.662156	0.172474	3.83916	0.000123454	0.000648057
WBGene00000079	311.344	-0.687542	0.163685	-4.2004	2.66e-05	0.000174796
WBGene00000080	279.322	-0.385878	0.0935315	-4.12565	3.7e-05	0.000231818
WBGene00000081	1751.49	-0.0408817	0.107142	-0.381566	0.702783	0.776485
WBGene00000082	8.23245	0.375946	0.376696	0.99801	0.318274	0.425815
WBGene00000083	5.71764	1.70206	0.522961	3.25467	0.00113524	0.00424385
WBGene00000084	10.1621	1.09963	0.402392	2.73273	0.00628116	0.0179897
WBGene00000085	0.573952	1.47225	1.60308	0.918388	0.358416	NA
WBGene00000086	6.63216	1.44492	0.481909	2.99831	0.00271479	0.00886798
WBGene00000088	13.1972	1.04633	0.312046	3.35312	0.000799067	0.00315569
WBGene00000089	4757.57	-0.148804	0.0964164	-1.54334	0.122747	0.202181
WBGene00000090	262.753	-0.101122	0.123251	-0.820453	0.411958	0.518913
WBGene00000092	16.8154	-0.659637	0.315227	-2.09258	0.0363867	0.0767129
WBGene00000093	77.2082	-0.190382	0.154012	-1.23615	0.216402	0.315545
WBGene00000094	47.2952	-0.484109	0.238872	-2.02665	0.0426987	0.0874684
WBGene00000095	25.7978	0.120325	0.235507	0.51092	0.609407	0.698604
WBGene00000096	38.8381	0.867306	0.18741	4.62786	3.69e-06	3.17e-05
WBGene00000097	296.745	-0.850726	0.142741	-5.95992	2.52e-09	5.27e-08
WBGene00000098	188.767	-0.396973	0.111108	-3.57286	0.000353101	0.00158232
WBGene00000099	799.174	-0.942984	0.0962785	-9.79434	1.19e-22	2.26e-20
WBGene00000100	86.3001	0.388065	0.159368	2.43503	0.0148907	0.0370773
WBGene00000101	462.722	-0.261498	0.0742174	-3.52341	0.000426038	0.0018598
WBGene00000102	290.372	-0.434752	0.0993989	-4.37382	1.22e-05	8.74e-05
WBGene00000103	75.0928	1.80406	0.315763	5.71333	1.11e-08	1.95e-07
WBGene00000105	240.083	1.56273	0.190225	8.21515	2.12e-16	1.95e-14
WBGene00000106	106.908	-0.733135	0.214629	-3.41583	0.000635871	0.00260626
WBGene00000107	82.4181	-0.165659	0.163474	-1.01337	0.310884	0.417666
WBGene00000108	2.18865	0.351802	0.960395	0.36631	0.714134	0.785395
WBGene00000109	636.827	-0.508263	0.163981	-3.09953	0.0019383	0.00668595
WBGene00000110	337.362	-0.546277	0.0951952	-5.7385	9.55e-09	1.72e-07
WBGene00000111	54.0005	1.12334	0.315445	3.56112	0.000369283	0.00164428
WBGene00000112	410.557	-0.118197	0.0851466	-1.38816	0.165087	0.256302
WBGene00000113	141.838	0.649104	0.208111	3.11903	0.00181447	0.00632226
WBGene00000114	211.476	0.0486134	0.122687	0.396239	0.691929	0.768087
WBGene00000115	1077.24	-0.82235	0.117325	-7.00919	2.4e-12	9.95e-11
WBGene00000116	4.32849	2.54057	0.623727	4.07321	4.64e-05	0.000281664
WBGene00000117	93.8347	-0.134408	0.177354	-0.757848	0.448542	0.554341
WBGene00000118	3.68744	0.99692	0.589174	1.69206	0.0906337	0.158562
WBGene00000120	29.0027	-0.20454	0.260725	-0.784506	0.432743	0.539099
WBGene00000121	234.333	-0.0141683	0.0970231	-0.14603	0.883898	0.917175
WBGene00000122	207.339	-0.798128	0.170943	-4.66896	3.03e-06	2.66e-05
WBGene00000123	2246.91	-0.63343	0.140567	-4.50624	6.6e-06	5.18e-05
WBGene00000133	1.51893	2.13857	1.47303	1.45182	0.146552	0.233255
WBGene00000134	1.08598	-1.03616	1.15421	-0.897724	0.369333	0.476932
WBGene00000135	1.39416	1.96295	1.02746	1.91049	0.0560701	0.108572
WBGene00000136	6.89675	0.940287	0.49556	1.89742	0.057772	0.111208
WBGene00000137	10.6275	-0.351772	0.368098	-0.955648	0.33925	0.447661
WBGene00000138	12.3078	0.834421	0.345671	2.41392	0.0157819	0.0388961
WBGene00000139	3.8542	1.82211	0.638842	2.85221	0.00434162	0.0131112
WBGene00000140	3887.4	-0.429838	0.122658	-3.50437	0.000457696	0.00197005
WBGene00000142	171.286	-0.319762	0.119288	-2.68058	0.00734952	0.0205881
WBGene00000143	177.1	-0.673849	0.188208	-3.58035	0.000343132	0.00154469
WBGene00000144	72.8789	-0.35629	0.150046	-2.37454	0.0175711	0.0424582
WBGene00000145	64.7651	-0.727224	0.199078	-3.65295	0.000259244	0.00121768
WBGene00000146	323.023	-0.494069	0.147437	-3.35106	0.000805018	0.00317343
WBGene00000147	145.665	0.222505	0.105271	2.11365	0.0345455	0.073542
WBGene00000148	203.271	0.151451	0.108268	1.39885	0.161858	0.252529
WBGene00000149	12.9852	1.13607	0.3826	2.96933	0.00298451	0.00960809
WBGene00000150	4.20641	1.89569	0.568545	3.33428	0.000855207	0.00334637
WBGene00000151	385.07	-0.69011	0.140336	-4.91757	8.76e-07	9.15e-06
WBGene00000155	465.487	-0.418707	0.175148	-2.39059	0.0168214	0.0410195
WBGene00000156	663.339	-0.322019	0.130254	-2.47224	0.0134271	0.0340359
WBGene00000157	40.0353	-0.125157	0.23598	-0.530374	0.595853	0.687371
WBGene00000158	467.572	-0.569402	0.15733	-3.61915	0.000295572	0.00135804
WBGene00000159	142.352	-0.506367	0.125461	-4.03605	5.44e-05	0.000322887
WBGene00000160	407.128	-0.284049	0.0929012	-3.05754	0.00223161	0.00752031
WBGene00000161	63.9732	-0.413747	0.232759	-1.77757	0.0754738	0.137429
WBGene00000162	324.236	-0.135873	0.124562	-1.09081	0.275358	0.380135
WBGene00000163	197.863	-0.371342	0.102431	-3.62529	0.000288642	0.00133025
WBGene00000164	9.36782	0.920373	0.369984	2.4876	0.0128608	0.0328621
WBGene00000165	28.5479	-0.579055	0.263088	-2.20099	0.0277365	0.0616311
WBGene00000166	1.04231	2.58159	1.35011	1.91214	0.0558585	0.108227
WBGene00000168	78.2068	-0.249199	0.144004	-1.7305	0.0835408	0.148729
WBGene00000169	4.76182	1.85561	0.604337	3.07049	0.00213707	0.00725787
WBGene00000170	8.24704	1.08016	0.443768	2.43407	0.0149301	0.0371659
WBGene00000171	1.34666	0.68996	0.981123	0.703235	0.481909	0.585171
WBGene00000172	7.59964	0.852486	0.461342	1.84784	0.0646258	0.121513
WBGene00000173	0.512425	-0.670783	2.03424	-0.329746	0.741592	NA
WBGene00000174	0.605502	-1.22397	1.39034	-0.880338	0.378676	NA
WBGene00000175	6.72581	-0.46468	0.454752	-1.02183	0.306861	0.41348
WBGene00000176	0.182177	0.420738	2.97447	0.141449	0.887515	NA
WBGene00000177	295.463	0.17232	0.0993129	1.73512	0.082719	0.147561
WBGene00000178	104.958	0.459762	0.156937	2.92961	0.00339392	0.0106959
WBGene00000179	5.17629	-0.306827	0.492856	-0.622549	0.533581	0.632244
WBGene00000180	4.41875	0.850972	0.522857	1.62754	0.103622	0.176664
WBGene00000181	39.7213	0.258546	0.206578	1.25157	0.210728	0.309343
WBGene00000182	270.483	-0.36243	0.139654	-2.5952	0.00945349	0.0254221
WBGene00000183	229.283	-0.736479	0.128784	-5.71873	1.07e-08	1.9e-07
WBGene00000184	206.615	-0.36636	0.156124	-2.34659	0.0189461	0.0452436
WBGene00000185	4.02724	0.992095	0.66751	1.48626	0.13721	0.22097
WBGene00000186	568.224	-0.383768	0.0775792	-4.94679	7.54e-07	8e-06
WBGene00000187	111.792	-0.34806	0.126186	-2.75831	0.00581003	0.0168547
WBGene00000188	2.22188	1.48745	0.916868	1.62232	0.104735	0.178144
WBGene00000189	26.6356	-0.224304	0.220324	-1.01807	0.308647	0.415315
WBGene00000190	6.15922	1.15402	0.583808	1.9767	0.0480752	0.0960231
WBGene00000191	15.1874	1.91488	0.370131	5.17351	2.3e-07	2.85e-06
WBGene00000192	226.825	-0.304918	0.0962342	-3.1685	0.00153226	0.00548422
WBGene00000193	0.169018	0.420737	3.04598	0.138128	0.890139	NA
WBGene00000195	32.5215	-0.86933	0.254897	-3.41052	0.000648402	0.00264765
WBGene00000196	483.508	-0.0625046	0.0966778	-0.646525	0.517939	0.617632
WBGene00000197	2899.01	-0.71077	0.146102	-4.86487	1.15e-06	1.15e-05
WBGene00000198	116.351	-0.234252	0.122295	-1.91547	0.0554323	0.10755
WBGene00000199	162.313	-0.572703	0.142559	-4.01731	5.89e-05	0.000344448
WBGene00000200	195.016	-0.39773	0.102131	-3.8943	9.85e-05	0.000533997
WBGene00000201	194.57	-0.35239	0.164072	-2.14777	0.031732	0.0688616
WBGene00000202	85.5232	-0.382305	0.160533	-2.38148	0.0172434	0.0418299
WBGene00000203	79.1449	-0.455874	0.181267	-2.51492	0.0119058	0.0308402
WBGene00000204	426.995	-0.441038	0.107013	-4.12135	3.77e-05	0.000235442
WBGene00000205	108.52	-0.0779308	0.156358	-0.498412	0.618194	0.706116
WBGene00000206	74.1424	0.625198	0.190858	3.27573	0.00105389	0.00398226
WBGene00000207	418.534	-0.507334	0.168305	-3.01438	0.00257509	0.00848803
WBGene00000208	168.861	-0.251646	0.207399	-1.21334	0.225	0.325227
WBGene00000209	99.8483	0.383024	0.130832	2.9276	0.00341584	0.0107581
WBGene00000210	64.2267	0.260299	0.190108	1.36922	0.170932	0.263435
WBGene00000211	1.9563	-0.14863	0.831532	-0.178742	0.85814	0.896859
WBGene00000212	2.47595	2.37833	0.838161	2.83756	0.00454592	0.0136587
WBGene00000213	37.0269	-0.162469	0.250553	-0.648441	0.5167	0.616491
WBGene00000214	27.9884	1.96661	0.430874	4.56423	5.01e-06	4.1e-05
WBGene00000215	6.90104	2.41379	0.528753	4.56506	4.99e-06	4.09e-05
WBGene00000216	16.9797	2.35166	0.388341	6.05567	1.4e-09	3.13e-08
WBGene00000217	25.4557	0.132476	0.261603	0.506402	0.612574	0.701371
WBGene00000218	8.09687	2.52729	0.491231	5.14481	2.68e-07	3.26e-06
WBGene00000219	35.9771	2.45445	0.432165	5.67944	1.35e-08	2.33e-07
WBGene00000220	1.7181	2.82952	0.974571	2.90335	0.00369191	0.0114672
WBGene00000221	788.683	0.271795	0.238012	1.14194	0.25348	0.356787
WBGene00000222	165.151	-0.553312	0.159164	-3.47637	0.000508258	0.00215955
WBGene00000223	269.573	0.00105599	0.104846	0.0100718	0.991964	0.994654
WBGene00000224	181.663	0.448323	0.137837	3.25255	0.00114375	0.00427158
WBGene00000225	10.346	0.0266857	0.353246	0.0755442	0.939782	0.958266
WBGene00000226	1352.26	-0.822637	0.17676	-4.65396	3.26e-06	2.84e-05
WBGene00000227	1547.11	-0.495429	0.0826295	-5.9958	2.02e-09	4.33e-08
WBGene00000228	6.53494	1.14022	0.496655	2.29579	0.0216877	0.0504381
WBGene00000229	397.003	-0.116085	0.122412	-0.948319	0.342967	0.45112
WBGene00000230	107.989	-0.472489	0.143684	-3.28839	0.00100762	0.00383986
WBGene00000231	417.268	-0.0935681	0.142911	-0.654732	0.512641	0.613066
WBGene00000232	12.2936	1.01872	0.373261	2.72925	0.00634777	0.0181434
WBGene00000233	3.98607	-0.0910459	0.695088	-0.130985	0.895787	0.925494
WBGene00000235	62.5322	-0.376236	0.189134	-1.98925	0.0466731	0.0938825
WBGene00000236	217.102	-0.131337	0.103446	-1.26962	0.20422	0.302463
WBGene00000237	229.06	0.29979	0.174561	1.71739	0.0859075	0.152224
WBGene00000238	17.5134	0.909664	0.497408	1.82881	0.0674283	0.125637
WBGene00000239	1.94081	2.05575	1.12766	1.82303	0.0682989	0.126951
WBGene00000240	10.0596	2.55212	0.480781	5.30828	1.11e-07	1.51e-06
WBGene00000241	48.9472	0.878271	0.288659	3.04259	0.00234555	0.00783958
WBGene00000242	3.97668	3.71523	0.916123	4.05538	5.01e-05	0.00030087
WBGene00000244	2.95988	2.93097	1.02746	2.85264	0.00433573	0.0131015
WBGene00000245	12.4153	2.7338	0.397452	6.87833	6.06e-12	2.33e-10
WBGene00000246	1.81597	0.67767	1.01378	0.668457	0.503842	0.60524
WBGene00000247	436.093	-0.72923	0.190765	-3.82266	0.00013202	0.000688232
WBGene00000248	157.904	-0.350084	0.140511	-2.4915	0.0127205	0.0325631
WBGene00000249	193.988	-0.887351	0.206831	-4.29022	1.78e-05	0.000122859
WBGene00000250	191.955	0.230918	0.110647	2.08698	0.0368897	0.0775723
WBGene00000251	3.73491	1.02604	0.717805	1.42941	0.152887	0.24126
WBGene00000252	1.80206	1.55198	1.03226	1.50347	0.132718	0.215026
WBGene00000253	275.68	1.03714	0.15275	6.78979	1.12e-11	4.1e-10
WBGene00000254	396.45	-0.148478	0.106737	-1.39107	0.164203	0.255254
WBGene00000255	1.20959	0.646651	1.1465	0.56402	0.572741	0.667942
WBGene00000256	12.4092	0.632326	0.314348	2.01155	0.0442679	0.0900148
WBGene00000257	2401.32	-0.713046	0.100292	-7.10973	1.16e-12	5.17e-11
WBGene00000259	153.05	-0.254384	0.129071	-1.97088	0.0487375	0.0970391
WBGene00000262	437.653	-0.622916	0.152419	-4.08686	4.37e-05	0.000267598
WBGene00000263	20.4701	0.832227	0.273492	3.04297	0.00234255	0.00783222
WBGene00000264	412.471	-0.642564	0.171016	-3.75733	0.000171737	0.000856682
WBGene00000265	321.936	-0.112316	0.151399	-0.741854	0.458176	0.563317
WBGene00000266	70.1627	0.837438	0.265721	3.15157	0.00162393	0.00574623
WBGene00000267	225.808	-0.132172	0.147716	-0.894766	0.370912	0.478647
WBGene00000268	69.9743	0.24622	0.16591	1.48406	0.137793	0.221655
WBGene00000269	29.8008	0.529746	0.220767	2.39957	0.0164143	0.0401868
WBGene00000270	120.541	-0.520514	0.145506	-3.57727	0.0003472	0.00156157
WBGene00000271	432.49	-0.270299	0.134797	-2.00524	0.0449375	0.0910835
WBGene00000272	1.1149	1.29577	1.16791	1.10948	0.267223	0.371462
WBGene00000273	0.86796	-0.860741	1.22589	-0.702137	0.482594	0.585712
WBGene00000274	1090.61	-0.630711	0.142373	-4.42998	9.42e-06	6.99e-05
WBGene00000275	2009.07	-0.763082	0.199076	-3.83313	0.000126525	0.000662408
WBGene00000276	346.22	-0.24398	0.11477	-2.12582	0.0335183	0.0718862
WBGene00000277	7.26532	2.7557	0.55733	4.94447	7.64e-07	8.08e-06
WBGene00000279	10.9449	0.196184	0.335948	0.583972	0.559239	0.656022
WBGene00000280	3.43719	-0.581635	0.650065	-0.894734	0.37093	0.478647
WBGene00000281	3.95323	3.16293	0.884482	3.57602	0.000348867	0.00156726
WBGene00000282	0.597712	2.03712	1.52028	1.33997	0.180256	NA
WBGene00000283	1.38197	1.26163	0.954763	1.3214	0.186367	0.282026
WBGene00000284	0.789624	0.600927	1.29233	0.464996	0.641934	0.72671
WBGene00000285	1.28858	1.24945	1.05629	1.18287	0.236861	0.338723
WBGene00000286	3.33128	-0.049988	0.636894	-0.0784872	0.93744	0.956341
WBGene00000287	1.43217	-0.263767	0.944304	-0.279324	0.779996	0.838282
WBGene00000288	0.845179	1.59874	1.33836	1.19455	0.232263	0.333511
WBGene00000289	67.1862	0.253097	0.168863	1.49883	0.133917	0.216593
WBGene00000292	200.446	0.158639	0.157434	1.00765	0.313621	0.42045
WBGene00000293	186.694	-0.295883	0.170346	-1.73695	0.0823953	0.147145
WBGene00000294	128.56	0.90079	0.220441	4.08631	4.38e-05	0.000268142
WBGene00000295	0.872212	2.04971	1.25383	1.63476	0.102099	0.174614
WBGene00000296	3.8457	0.241989	0.653918	0.370061	0.711337	0.78333
WBGene00000298	2.73158	1.7632	0.753504	2.34	0.0192836	0.0459095
WBGene00000301	42.8915	-0.0928288	0.200754	-0.4624	0.643795	0.728412
WBGene00000302	6.30624	1.86784	0.496589	3.76135	0.000168999	0.000846766
WBGene00000308	1.20198	1.12658	1.01208	1.11314	0.265649	0.369818
WBGene00000310	3.87474	0.10946	0.629187	0.17397	0.861889	0.899674
WBGene00000311	4.49251	-0.418449	0.525795	-0.795839	0.426125	0.53333
WBGene00000366	1023.29	-0.442177	0.0925187	-4.77932	1.76e-06	1.68e-05
WBGene00000367	8.0873	1.34977	0.540757	2.49608	0.0125574	0.0322256
WBGene00000368	233.913	0.136105	0.141055	0.964906	0.334592	0.442928
WBGene00000369	566.315	-0.799136	0.128241	-6.23152	4.62e-10	1.17e-08
WBGene00000370	2.29173	1.09036	0.796683	1.36863	0.171116	0.263678
WBGene00000371	267.505	-0.208546	0.116547	-1.78938	0.0735535	0.134706
WBGene00000372	0.913413	1.98293	1.24613	1.59127	0.111548	0.187245
WBGene00000373	13.3099	5.94642	0.796131	7.46916	8.07e-14	4.58e-12
WBGene00000374	220.054	0.6727	0.10963	6.13608	8.46e-10	2.01e-08
WBGene00000375	139.287	-0.215499	0.130436	-1.65215	0.0985046	0.169727
WBGene00000376	300.226	-0.526275	0.134132	-3.92356	8.72e-05	0.000481889
WBGene00000377	407.493	-0.442439	0.11015	-4.01669	5.9e-05	0.000345145
WBGene00000378	489.645	-0.355713	0.0966783	-3.67935	0.000233832	0.00111461
WBGene00000379	339.344	-0.580445	0.115587	-5.02172	5.12e-07	5.7e-06
WBGene00000380	197.891	-0.840702	0.124505	-6.75235	1.45e-11	5.21e-10
WBGene00000381	364.939	-0.154071	0.0815908	-1.88834	0.0589804	0.113024
WBGene00000382	455.565	-0.594239	0.181266	-3.27827	0.00104445	0.00395282
WBGene00000383	862.697	-0.336613	0.0874046	-3.85121	0.000117536	0.000621489
WBGene00000386	433.375	-0.680902	0.172201	-3.95411	7.68e-05	0.000432078
WBGene00000387	516.384	-0.0316238	0.126681	-0.249634	0.802871	0.855662
WBGene00000388	32.5507	-0.862752	0.263463	-3.27467	0.00105787	0.00399269
WBGene00000389	5.45141	2.11811	0.547845	3.86625	0.000110522	0.000588687
WBGene00000390	198.321	-0.332065	0.129391	-2.56637	0.0102769	0.027229
WBGene00000391	1.04981	1.79371	1.18028	1.51973	0.128578	0.209619
WBGene00000392	113.365	-0.589772	0.151864	-3.88355	0.00010294	0.0005535
WBGene00000393	494.116	-0.313792	0.14758	-2.12625	0.0334825	0.0718174
WBGene00000395	31.5	0.779116	0.213541	3.64856	0.000263715	0.00123542
WBGene00000396	145.513	-0.00695493	0.172222	-0.0403835	0.967787	0.977207
WBGene00000397	97.4518	0.746117	0.205418	3.63219	0.000281021	0.0013031
WBGene00000399	6.14375	0.809745	0.458611	1.76564	0.0774554	0.140154
WBGene00000401	2.59951	1.5391	0.747853	2.05802	0.0395882	0.0821529
WBGene00000402	4.94397	0.551146	0.498444	1.10573	0.268842	0.373076
WBGene00000403	11.0426	-0.422423	0.352269	-1.19915	0.230469	0.331372
WBGene00000405	1992.01	-0.838326	0.164218	-5.10496	3.31e-07	3.9e-06
WBGene00000406	23.1179	-1.08227	0.303682	-3.56383	0.000365485	0.00162996
WBGene00000407	193.265	0.625769	0.103452	6.04887	1.46e-09	3.24e-08
WBGene00000408	207.397	-0.04209	0.125294	-0.335929	0.736925	0.804052
WBGene00000409	210.873	0.534138	0.108772	4.91064	9.08e-07	9.42e-06
WBGene00000410	579.817	-0.624953	0.158315	-3.94752	7.9e-05	0.000442366
WBGene00000411	362.269	-0.474263	0.0858043	-5.52726	3.25e-08	5.11e-07
WBGene00000412	0.938269	2.5032	1.32246	1.89284	0.0583793	0.112091
WBGene00000413	467.842	-0.228204	0.124901	-1.82708	0.0676877	0.126012
WBGene00000414	25.8485	-0.797772	0.285402	-2.79525	0.0051859	0.0153162
WBGene00000415	236.501	-0.100994	0.0915492	-1.10316	0.269957	0.374306
WBGene00000416	333.715	-0.790113	0.0922152	-8.56815	1.05e-17	1.13e-15
WBGene00000417	305.51	-0.0918847	0.0911549	-1.00801	0.313452	0.420309
WBGene00000418	411.761	-0.45512	0.140769	-3.2331	0.00122457	0.00453108
WBGene00000419	518.314	-0.414858	0.117556	-3.52904	0.000417074	0.00182538
WBGene00000420	111.766	-0.234403	0.124708	-1.87961	0.0601606	0.114747
WBGene00000421	388.807	0.268603	0.0921012	2.91639	0.00354112	0.0110814
WBGene00000422	78.233	-0.609658	0.180796	-3.37207	0.000746045	0.00297446
WBGene00000423	168.199	-0.58278	0.126611	-4.60292	4.17e-06	3.5e-05
WBGene00000424	335.492	-0.278179	0.103665	-2.68344	0.00728701	0.0204345
WBGene00000425	1.47442	2.67112	1.07175	2.49231	0.0126916	0.0325063
WBGene00000426	177.848	0.0201054	0.102744	0.195684	0.844858	0.887227
WBGene00000427	3.23153	-0.113852	0.64317	-0.177017	0.859495	0.897892
WBGene00000428	0.597614	1.4472	1.43038	1.01176	0.311651	NA
WBGene00000429	3.10756	1.00614	0.665717	1.51136	0.130696	0.212347
WBGene00000430	1.9873	0.717217	0.803316	0.89282	0.371954	0.47959
WBGene00000431	1.21302	1.29409	1.14591	1.12931	0.258767	0.36264
WBGene00000432	0.407753	2.42267	2.43229	0.996046	0.319228	NA
WBGene00000433	2.01744	1.04916	0.856269	1.22527	0.220475	0.320268
WBGene00000434	10.4721	1.26028	0.447982	2.81324	0.00490449	0.0145862
WBGene00000435	1.8902	0.085457	0.839054	0.101849	0.918876	0.942554
WBGene00000436	0.803074	1.97245	1.50725	1.30864	0.190655	0.286763
WBGene00000437	0.649483	-0.830488	1.43136	-0.580207	0.561775	0.65813
WBGene00000438	0.311879	0.95115	2.60743	0.364784	0.715273	NA
WBGene00000439	0.565264	0.830353	1.46145	0.568171	0.569919	NA
WBGene00000440	0.71609	0.0679503	1.25409	0.0541829	0.956789	0.970064
WBGene00000441	2.40001	1.30618	0.740251	1.76451	0.0776457	0.140442
WBGene00000442	5.69993	1.20306	0.535573	2.24631	0.0246844	0.0561351
WBGene00000443	3137.09	-0.0236249	0.0907208	-0.260413	0.794545	0.849376
WBGene00000444	22.0746	-0.617823	0.333524	-1.85241	0.0639673	0.120494
WBGene00000445	0.86232	0.732718	1.37706	0.53209	0.594664	0.686482
WBGene00000446	0.563552	0.299445	1.75239	0.170879	0.864319	NA
WBGene00000447	0.520122	1.3905	2.04354	0.68044	0.496226	NA
WBGene00000448	11.8474	2.12911	0.433027	4.91679	8.8e-07	9.17e-06
WBGene00000449	2.55135	1.57555	0.84842	1.85704	0.0633058	0.119478
WBGene00000450	2.07193	2.35819	1.09013	2.16322	0.030524	0.0667576
WBGene00000451	0.253823	1.81628	2.26064	0.80344	0.42172	NA
WBGene00000452	12.081	-0.774989	0.349724	-2.216	0.0266912	0.0597578
WBGene00000453	4.26573	1.36083	0.786493	1.73025	0.0835856	0.148782
WBGene00000454	0.164832	-0.0164226	2.56949	-0.00639138	0.9949	NA
WBGene00000455	0.599519	0.322913	1.54877	0.208496	0.834842	NA
WBGene00000457	0.0715406	0.901628	3.11654	0.289304	0.772349	NA
WBGene00000458	3.28723	-0.314401	0.64881	-0.484581	0.627974	0.714888
WBGene00000459	207.461	-0.0903928	0.093326	-0.96857	0.33276	0.441128
WBGene00000460	635.516	0.183825	0.175516	1.04734	0.294942	0.401256
WBGene00000461	9.50089	-0.633415	0.38505	-1.64502	0.0999656	0.171775
WBGene00000462	236.407	0.324925	0.256721	1.26567	0.20563	0.303956
WBGene00000463	207.227	0.351201	0.172548	2.03538	0.0418129	0.0859053
WBGene00000464	205.354	-0.465294	0.18986	-2.45071	0.0142573	0.0357641
WBGene00000465	1036.31	1.22569	0.151256	8.10339	5.34e-16	4.65e-14
WBGene00000466	214.108	-0.381349	0.153303	-2.48755	0.0128627	0.0328629
WBGene00000467	584.324	-0.351089	0.080387	-4.36748	1.26e-05	8.98e-05
WBGene00000468	2.56614	0.705573	0.734365	0.960793	0.336656	0.444906
WBGene00000469	1013.87	-0.482995	0.195496	-2.47061	0.0134883	0.0341671
WBGene00000472	226.838	-0.245167	0.0919513	-2.66627	0.0076698	0.0213491
WBGene00000473	659.856	-0.1189	0.0960405	-1.23802	0.21571	0.314747
WBGene00000474	367.446	-0.738305	0.160036	-4.61338	3.96e-06	3.35e-05
WBGene00000475	77.0108	-0.176512	0.144679	-1.22003	0.222455	0.322477
WBGene00000476	0.253823	1.81628	2.26064	0.80344	0.42172	NA
WBGene00000477	25.2564	2.84017	0.427362	6.64583	3.02e-11	1e-09
WBGene00000478	13.5714	1.06631	0.435081	2.45083	0.0142529	0.0357618
WBGene00000479	950.53	-1.31581	0.17659	-7.4512	9.25e-14	5.19e-12
WBGene00000480	363.275	-0.317246	0.102034	-3.10921	0.0018759	0.00650622
WBGene00000481	0.836823	0.609171	1.20811	0.504235	0.614096	0.702706
WBGene00000482	74.5984	-0.048706	0.1879	-0.259213	0.795471	0.850009
WBGene00000483	1.01328	-0.0263969	1.40912	-0.0187329	0.985054	0.989143
WBGene00000484	1.4842	1.1376	1.17646	0.966965	0.333561	0.441922
WBGene00000485	7.77596	0.571297	0.496608	1.1504	0.24998	0.352849
WBGene00000487	2.47567	2.53436	0.889728	2.84846	0.00439314	0.0132545
WBGene00000488	0.96821	2.24369	1.39459	1.60886	0.107648	0.182055
WBGene00000490	1.7225	1.79825	0.905779	1.98531	0.0471105	0.0945297
WBGene00000491	2.13016	1.59941	0.806609	1.98289	0.04738	0.0949636
WBGene00000492	3.88521	0.719281	0.669642	1.07413	0.282765	0.388138
WBGene00000493	15.3907	1.38885	0.330625	4.20069	2.66e-05	0.000174633
WBGene00000496	608.865	-0.547404	0.0719267	-7.61058	2.73e-14	1.7e-12
WBGene00000497	478.868	-0.10575	0.0853236	-1.2394	0.215197	0.31421
WBGene00000498	613.634	-0.25995	0.136573	-1.90338	0.0569914	0.109943
WBGene00000499	1355.57	-0.373852	0.118459	-3.15596	0.0015997	0.00568203
WBGene00000500	340.33	-0.48618	0.0903721	-5.37975	7.46e-08	1.08e-06
WBGene00000501	4.41416	-0.21581	0.615821	-0.350443	0.726006	0.795595
WBGene00000502	227.708	-0.527041	0.153494	-3.43363	0.000595559	0.00246642
WBGene00000503	2.84436	0.353835	0.767622	0.46095	0.644835	0.729277
WBGene00000506	93.9029	-0.257223	0.150618	-1.70778	0.0876778	0.154661
WBGene00000507	107.889	-0.321036	0.142466	-2.25343	0.0242323	0.0552737
WBGene00000508	1259.29	-0.525367	0.142365	-3.69029	0.000223999	0.00107365
WBGene00000509	93.7108	-0.529317	0.140926	-3.75599	0.00017266	0.000859613
WBGene00000510	0.995442	2.96519	1.40056	2.11714	0.0342477	0.073019
WBGene00000511	3.80969	0.798504	0.564396	1.41479	0.157129	0.246522
WBGene00000512	24.6631	0.44056	0.283811	1.5523	0.12059	0.199365
WBGene00000513	1.00232	1.4446	1.18001	1.22422	0.220868	0.320719
WBGene00000514	775.559	-0.61786	0.105321	-5.86647	4.45e-09	8.67e-08
WBGene00000515	21.699	0.89414	0.362852	2.4642	0.0137321	0.034668
WBGene00000516	13.6914	0.0835983	0.320125	0.261143	0.793982	0.849052
WBGene00000517	541.121	-0.419103	0.153327	-2.7334	0.00626848	0.0179613
WBGene00000518	2763.95	-0.360672	0.100119	-3.60242	0.00031527	0.00143608
WBGene00000519	340.159	-0.186962	0.10422	-1.79392	0.0728253	0.13361
WBGene00000520	313.866	-0.578841	0.114368	-5.0612	4.17e-07	4.74e-06
WBGene00000521	1.1504	0.660106	1.10225	0.59887	0.549259	0.647143
WBGene00000522	3.00431	1.61763	0.652514	2.47907	0.0131724	0.0335273
WBGene00000523	11.8086	-0.0483752	0.338192	-0.14304	0.886258	0.91909
WBGene00000524	0.631017	1.75092	1.92746	0.908411	0.363661	0.47141
WBGene00000525	0.690292	1.16589	1.275	0.914422	0.360495	0.468334
WBGene00000526	2.12793	1.05083	0.802023	1.31022	0.190122	0.286223
WBGene00000527	12.7374	0.874644	0.349257	2.5043	0.0122695	0.0316028
WBGene00000528	1.82862	0.46959	0.810263	0.579552	0.562217	0.658412
WBGene00000529	2.27464	1.91742	0.903633	2.1219	0.0338464	0.0724314
WBGene00000530	164.123	-0.639102	0.171851	-3.71893	0.000200071	0.000975028
WBGene00000531	3.77322	-0.728916	0.61679	-1.18179	0.237289	0.339162
WBGene00000532	578.728	-0.746184	0.109498	-6.81456	9.46e-12	3.52e-10
WBGene00000533	235.947	0.033692	0.110827	0.304005	0.761124	0.823537
WBGene00000534	199.834	-0.325483	0.109424	-2.97451	0.00293454	0.00946432
WBGene00000535	281.729	-0.102962	0.227256	-0.453066	0.650501	0.734372
WBGene00000536	153.71	-0.341845	0.115539	-2.95871	0.00308929	0.00989501
WBGene00000537	212.165	-0.0278642	0.106107	-0.262605	0.792855	0.848251
WBGene00000539	2.82567	2.5566	0.890439	2.87117	0.00408952	0.0124826
WBGene00000540	124.453	-0.321141	0.138308	-2.32193	0.0202366	0.0477031
WBGene00000541	3.0632	2.08022	0.74373	2.79701	0.00515782	0.0152425
WBGene00000542	687.928	-0.129653	0.104178	-1.24454	0.2133	0.312021
WBGene00000543	1191.2	-0.476913	0.0656341	-7.26623	3.7e-13	1.86e-11
WBGene00000544	105.057	0.169098	0.153489	1.1017	0.270593	0.374969
WBGene00000545	1264.02	-0.469167	0.0866674	-5.41342	6.18e-08	9.13e-07
WBGene00000546	650.951	0.398793	0.137275	2.90506	0.00367188	0.011414
WBGene00000547	340.528	-0.213245	0.0895384	-2.3816	0.0172374	0.0418258
WBGene00000548	284.554	-0.487961	0.144111	-3.386	0.000709194	0.00285016
WBGene00000549	8908.98	-0.554776	0.0826291	-6.71405	1.89e-11	6.52e-10
WBGene00000550	678.906	-0.55935	0.116934	-4.78347	1.72e-06	1.65e-05
WBGene00000551	0.882821	3.39764	1.52875	2.22249	0.0262501	0.0589837
WBGene00000552	91.2824	0.376904	0.158688	2.37512	0.0175432	0.0424258
WBGene00000553	37.4545	0.537501	0.274609	1.95733	0.050309	0.0993705
WBGene00000554	1103.94	0.0260993	0.14847	0.175788	0.860461	0.898566
WBGene00000555	0.132226	0.901628	3.11654	0.289304	0.772349	NA
WBGene00000556	0.132226	0.901628	3.11654	0.289304	0.772349	NA
WBGene00000557	0.102875	0.420736	3.11654	0.135001	0.892611	NA
WBGene00000558	0.410068	1.65954	1.78847	0.927909	0.353455	NA
WBGene00000559	0	NA	NA	NA	NA	NA
WBGene00000560	0.0474271	-0.0601574	3.11654	-0.0193026	0.9846	NA
WBGene00000561	0.662261	-0.846536	1.51976	-0.557019	0.577514	0.671909
WBGene00000562	10.0679	1.26177	0.355672	3.54757	0.000388807	0.00172027
WBGene00000563	0.614303	1.7068	1.44465	1.18146	0.23742	0.33925
WBGene00000564	265.367	-0.581283	0.13808	-4.20976	2.56e-05	0.000168712
WBGene00000565	326.18	-0.531903	0.0858908	-6.19278	5.91e-10	1.45e-08
WBGene00000566	358.029	-0.22295	0.0975037	-2.28658	0.0222204	0.0514573
WBGene00000567	304.039	-0.307116	0.104298	-2.9446	0.00323368	0.0102686
WBGene00000583	1.3723	1.68723	1.31061	1.28736	0.197968	0.29501
WBGene00000584	1.48288	0.545255	1.05536	0.516654	0.605398	0.695309
WBGene00000585	155.194	-0.115645	0.134305	-0.861061	0.389204	0.49654
WBGene00000591	49.8984	0.824914	0.248632	3.31781	0.000907262	0.00352333
WBGene00000592	488.438	-0.428095	0.141	-3.03613	0.00239639	0.00797413
WBGene00000593	17.0006	0.123911	0.314852	0.393554	0.693911	0.769305
WBGene00000594	2.02485	1.43662	0.862815	1.66504	0.0959048	0.166167
WBGene00000596	0.790695	-0.889615	1.29756	-0.685603	0.492963	0.595421
WBGene00000597	0.8914	-0.372392	1.75312	-0.212417	0.831782	0.877502
WBGene00000598	0.406537	-0.359085	1.8964	-0.189351	0.849818	NA
WBGene00000599	8.0447	0.391539	0.396591	0.987262	0.323514	0.431206
WBGene00000601	1.67737	0.412239	0.828575	0.497527	0.618817	0.706622
WBGene00000602	0.613895	1.69774	1.37994	1.23029	0.218587	0.318092
WBGene00000603	0.854293	0.806439	1.23467	0.653164	0.513651	0.613862
WBGene00000606	63.4093	2.61341	1.07986	2.42014	0.0155145	0.0383527
WBGene00000608	1.57027	-0.352453	0.878931	-0.401002	0.688418	0.765057
WBGene00000609	10.5454	0.723937	0.357801	2.0233	0.0430423	0.0880527
WBGene00000610	2.4565	-0.97813	0.751481	-1.3016	0.193052	0.289398
WBGene00000611	6.50776	0.242417	0.46222	0.524463	0.599957	0.690964
WBGene00000612	3.77869	1.11719	0.660613	1.69115	0.0908086	0.15884
WBGene00000613	0.950755	-1.57651	1.19152	-1.32311	0.1858	0.281421
WBGene00000614	0.972629	1.16377	1.28425	0.906185	0.364838	0.472529
WBGene00000615	785.346	-0.210869	0.142553	-1.47923	0.139078	0.223264
WBGene00000616	4.39912	0.0422389	0.569248	0.0742012	0.94085	0.959156
WBGene00000617	3.03585	2.15508	0.76063	2.83329	0.00460722	0.0138111
WBGene00000618	1.98717	1.11191	0.853797	1.30232	0.192808	0.289179
WBGene00000620	20.9688	0.0685906	0.248598	0.27591	0.782617	0.840476
WBGene00000621	1.1081	2.57195	1.22918	2.09242	0.0364012	0.0767339
WBGene00000622	762.061	0.214246	0.103455	2.0709	0.0383677	0.0800782
WBGene00000623	18.1273	2.46548	0.378487	6.51403	7.32e-11	2.23e-09
WBGene00000624	0.148325	1.43582	3.1122	0.461351	0.644546	NA
WBGene00000625	2.82256	1.68793	0.978939	1.72424	0.0846638	0.150434
WBGene00000626	0.843323	1.30952	1.39066	0.941648	0.346373	0.45438
WBGene00000627	4.17598	2.45296	0.707541	3.46688	0.000526536	0.00222851
WBGene00000628	0.888339	0.978236	1.08806	0.899066	0.368617	0.476291
WBGene00000629	0.976435	1.45744	1.38299	1.05383	0.291961	0.397973
WBGene00000630	8.35312	0.385054	0.407899	0.943993	0.345173	0.4532
WBGene00000631	2.47705	1.93069	0.746188	2.5874	0.00967029	0.0258666
WBGene00000632	0.589881	2.88487	1.88238	1.53256	0.125384	NA
WBGene00000633	4.70814	0.814156	0.523414	1.55547	0.119833	0.198332
WBGene00000634	0.676065	2.30346	1.49132	1.54457	0.122449	0.201793
WBGene00000636	675.584	-0.121276	0.133764	-0.906646	0.364594	0.472275
WBGene00000637	0.446561	1.47083	1.80318	0.815683	0.414681	NA
WBGene00000638	21.14	0.331857	0.253869	1.3072	0.191146	0.28729
WBGene00000639	7.1772	0.776789	0.432778	1.79489	0.0726709	0.133376
WBGene00000640	8.52758	1.44042	0.40881	3.52344	0.000425984	0.0018598
WBGene00000641	5.7643	1.00744	0.50402	1.9988	0.0456296	0.0921676
WBGene00000642	1.7271	1.35699	0.850864	1.59484	0.110749	0.186223
WBGene00000644	14.4478	0.213813	0.355198	0.601954	0.547205	0.645149
WBGene00000645	1.28989	1.70042	1.20421	1.41206	0.157933	0.247549
WBGene00000646	1.79388	2.31458	0.974755	2.37452	0.0175718	0.0424582
WBGene00000647	5374.66	-0.569896	0.0815519	-6.98814	2.79e-12	1.15e-10
WBGene00000648	50.0541	1.38855	0.353651	3.92634	8.62e-05	0.000477034
WBGene00000649	63.0053	2.67593	1.05899	2.52686	0.0115087	0.0299859
WBGene00000650	0.402476	1.4971	1.8451	0.811389	0.417142	NA
WBGene00000651	0.54181	2.74128	2.31581	1.18372	0.236523	NA
WBGene00000652	11.4343	1.18618	0.345667	3.43158	0.000600078	0.00248135
WBGene00000653	2.966	0.0493289	0.613051	0.0804647	0.935868	0.95522
WBGene00000654	0.42794	1.33103	1.82599	0.728937	0.46604	NA
WBGene00000655	0.446466	0.942333	2.04045	0.461826	0.644206	NA
WBGene00000656	0.805229	0.422906	1.25445	0.337124	0.736024	0.803203
WBGene00000657	4.50724	0.0898859	0.521362	0.172406	0.863119	0.900861
WBGene00000658	1.07928	0.62294	1.12043	0.555982	0.578223	0.672534
WBGene00000659	0.818911	1.01228	1.4596	0.69353	0.487977	0.590636
WBGene00000660	21.7502	1.06697	0.313233	3.40632	0.000658438	0.00268081
WBGene00000661	6.30272	1.36475	0.492165	2.77296	0.00555493	0.0162426
WBGene00000662	7.89638	1.39108	0.420287	3.30983	0.000933517	0.0036067
WBGene00000663	7.4485	0.709681	0.53469	1.32728	0.184417	0.280025
WBGene00000664	7.88157	1.38581	0.457134	3.03151	0.00243335	0.0080738
WBGene00000665	2.06438	0.552785	0.88596	0.623939	0.532668	0.631506
WBGene00000666	1.9492	0.16423	0.911939	0.180088	0.857083	0.896137
WBGene00000667	5.8147	-0.0322541	0.483224	-0.0667477	0.946783	0.963126
WBGene00000668	4.56358	0.356605	0.535127	0.666394	0.505159	0.606525
WBGene00000669	6.74525	0.0172336	0.438458	0.039305	0.968647	0.977778
WBGene00000670	1.83318	1.07948	1.06618	1.01247	0.311313	0.418129
WBGene00000671	15.8919	-0.080175	0.303166	-0.264459	0.791426	0.847151
WBGene00000672	150.903	-0.609257	0.229434	-2.65548	0.00791954	0.0219104
WBGene00000673	1.69671	2.7945	1.01063	2.76509	0.00569063	0.0165745
WBGene00000674	5.30178	1.16442	0.536284	2.17127	0.0299106	0.0656652
WBGene00000675	2.90009	0.264434	0.635337	0.41621	0.677256	0.756341
WBGene00000676	5.98988	0.150402	0.441331	0.340792	0.73326	0.801169
WBGene00000677	97.2053	-0.134934	0.171762	-0.785588	0.432109	0.538481
WBGene00000678	9.58115	0.568501	0.402755	1.41153	0.158089	0.247735
WBGene00000679	1.20673	0.990991	1.15785	0.855889	0.392059	0.499109
WBGene00000680	0.325593	0.481383	1.90905	0.252158	0.800919	NA
WBGene00000681	4.5912	1.54291	0.711123	2.16969	0.0300307	0.0658625
WBGene00000682	1.23732	0.287334	1.17583	0.244367	0.806947	0.858791
WBGene00000683	3.90909	-0.332767	0.601156	-0.553545	0.57989	0.674153
WBGene00000684	1.06734	0.999444	1.05671	0.945804	0.344249	0.45235
WBGene00000685	2666.5	-0.116416	0.118864	-0.979411	0.327377	0.435229
WBGene00000687	1.69911	1.15727	0.94744	1.22147	0.221908	0.321922
WBGene00000688	20.4441	0.481653	0.253391	1.90083	0.0573243	0.110498
WBGene00000689	2.18614	1.20654	0.872107	1.38348	0.166518	0.258012
WBGene00000690	0.357336	2.22252	2.08832	1.06426	0.287209	NA
WBGene00000691	35.7171	-0.21575	0.223038	-0.967325	0.333382	0.441773
WBGene00000692	0.671396	1.52236	1.52273	0.999757	0.317428	0.424943
WBGene00000693	1.84032	-0.160675	0.815263	-0.197084	0.843762	0.88646
WBGene00000694	0.305951	-0.84883	2.24543	-0.378025	0.705412	NA
WBGene00000695	1.22104	-0.413448	1.07562	-0.38438	0.700697	0.774661
WBGene00000696	2.80186	-0.284509	0.629464	-0.451986	0.651279	0.735038
WBGene00000697	1.0732	1.5565	1.29949	1.19778	0.231004	0.331971
WBGene00000698	6.95334	0.697139	0.449236	1.55183	0.120702	0.199507
WBGene00000699	1.94636	0.302553	0.754279	0.401115	0.688336	0.765008
WBGene00000700	2.18092	-0.0237474	0.796516	-0.0298141	0.976215	0.983189
WBGene00000701	12.9118	-0.271455	0.301908	-0.899133	0.368582	0.476291
WBGene00000702	0.917663	1.79328	1.15116	1.5578	0.11928	0.197618
WBGene00000703	11.6717	-0.491656	0.34641	-1.41929	0.155815	0.244876
WBGene00000704	17.3632	-0.238544	0.276278	-0.863419	0.387907	0.495368
WBGene00000705	0.356612	1.97771	2.11622	0.934546	0.350022	NA
WBGene00000706	13.5077	0.507072	0.311193	1.62945	0.103218	0.17616
WBGene00000707	16.027	-0.192698	0.307656	-0.626343	0.53109	0.630131
WBGene00000708	3.37917	2.81244	0.873162	3.22098	0.00127753	0.00469777
WBGene00000709	31.4957	0.392844	0.223279	1.75943	0.078505	0.141617
WBGene00000710	3.01948	0.704304	0.761371	0.925047	0.354941	0.462801
WBGene00000711	1.35238	2.05305	1.70848	1.20169	0.229485	0.330393
WBGene00000712	180.461	-0.00683313	0.128266	-0.053273	0.957514	0.970354
WBGene00000713	2.88099	-0.575466	0.660918	-0.870708	0.383914	0.491293
WBGene00000714	0.688805	1.24789	1.75558	0.710816	0.477198	0.580983
WBGene00000715	1.00056	0.0442374	1.16833	0.0378636	0.969796	0.978636
WBGene00000716	1.77419	1.48473	0.951771	1.55997	0.118767	0.1969
WBGene00000717	8.51581	0.827832	0.575178	1.43926	0.150076	0.237744
WBGene00000718	8.23888	0.797855	0.664698	1.20033	0.230012	0.330913
WBGene00000719	0.78131	1.8696	1.3059	1.43165	0.152243	0.240477
WBGene00000720	6.70375	-0.242632	0.457159	-0.53074	0.595599	0.687197
WBGene00000721	0.335023	0.945028	2.17286	0.434923	0.663619	NA
WBGene00000722	1.73721	1.85623	0.925351	2.00598	0.0448589	0.0909806
WBGene00000723	0.999331	-1.37589	1.09532	-1.25616	0.209058	0.307653
WBGene00000724	0.538724	1.06504	1.7736	0.600492	0.548178	NA
WBGene00000725	0.153569	1.43665	3.11218	0.461622	0.644352	NA
WBGene00000726	0.333136	1.33423	1.87088	0.713156	0.475749	NA
WBGene00000727	39.9563	0.179754	0.176175	1.02032	0.307579	0.414294
WBGene00000728	692.048	-0.0602545	0.0822408	-0.732659	0.463766	0.568318
WBGene00000729	1.97584	0.548585	0.772741	0.709921	0.477753	0.581494
WBGene00000730	1080.72	-0.0263146	0.0944357	-0.278651	0.780512	0.838721
WBGene00000731	4.49911	0.774724	0.645336	1.2005	0.229946	0.330911
WBGene00000732	1.34649	-0.20256	1.02767	-0.197106	0.843744	0.88646
WBGene00000733	1.88337	-1.37975	0.85526	-1.61326	0.106689	0.180838
WBGene00000734	373.911	-0.0380047	0.154388	-0.246163	0.805556	0.857706
WBGene00000735	184.114	-0.0759388	0.189604	-0.400513	0.688779	0.765283
WBGene00000736	5.17607	0.963919	0.535709	1.79933	0.0719662	0.132294
WBGene00000737	1.31865	1.42733	1.01164	1.41091	0.158272	0.247981
WBGene00000738	1.26992	1.82937	1.22428	1.49425	0.135112	0.218147
WBGene00000739	4.49384	0.180023	0.537884	0.334687	0.737861	0.804805
WBGene00000740	0.102875	0.420736	3.11654	0.135001	0.892611	NA
WBGene00000741	0.248579	1.7943	2.26852	0.790954	0.428971	NA
WBGene00000742	0.0715406	0.901628	3.11654	0.289304	0.772349	NA
WBGene00000743	0.0960676	0.420736	3.11654	0.135001	0.892611	NA
WBGene00000744	3.03745	2.52541	0.735434	3.4339	0.000594959	0.00246539
WBGene00000745	0.738475	2.58471	1.28457	2.01212	0.0442073	0.0899289
WBGene00000746	2.83952	1.5958	0.737235	2.16457	0.0304207	0.0665762
WBGene00000747	0.803276	0.57018	1.31045	0.435103	0.663488	0.745126
WBGene00000748	1.01163	1.69331	1.19388	1.41832	0.156096	0.245267
WBGene00000749	0.351201	0.837537	1.6888	0.495936	0.61994	NA
WBGene00000750	1.32768	2.8492	1.17976	2.41508	0.0157318	0.038797
WBGene00000751	0.58524	1.56314	1.77499	0.880645	0.37851	NA
WBGene00000752	0.408677	-1.14568	2.11452	-0.541817	0.587945	NA
WBGene00000753	12.3744	-0.16896	0.427504	-0.395223	0.692678	0.76857
WBGene00000754	1.02319	0.534348	1.26358	0.422883	0.672381	0.752569
WBGene00000755	0.791636	2.02069	1.92702	1.04861	0.294359	0.400573
WBGene00000756	1.61959	0.576751	0.872893	0.660735	0.508782	0.609717
WBGene00000757	0.244387	0.947412	2.31469	0.409304	0.682316	NA
WBGene00000758	2.36847	-0.292797	0.761642	-0.384429	0.700661	0.774661
WBGene00000759	0.464731	1.7879	1.60795	1.11191	0.266176	NA
WBGene00000760	4.1355	0.982424	0.56318	1.74442	0.0810854	0.145309
WBGene00000761	242.556	-0.0494395	0.110432	-0.44769	0.654377	0.737681
WBGene00000762	218.674	-0.0704899	0.0968205	-0.728047	0.466585	0.570914
WBGene00000763	569.404	-0.825689	0.174243	-4.73872	2.15e-06	2e-05
WBGene00000764	45.8551	-0.595418	0.263055	-2.26347	0.0236066	0.0540541
WBGene00000765	227.947	-0.864881	0.219442	-3.94127	8.11e-05	0.000452368
WBGene00000766	44.1644	0.0341652	0.195496	0.174762	0.861267	0.899216
WBGene00000767	169.638	-0.474516	0.173559	-2.73404	0.00625632	0.0179317
WBGene00000768	113.433	0.9877	0.18158	5.43947	5.34e-08	8.01e-07
WBGene00000770	488.532	-0.442017	0.105593	-4.18603	2.84e-05	0.000184626
WBGene00000771	6.6737	2.52508	0.564736	4.47127	7.78e-06	5.94e-05
WBGene00000772	989.006	-0.672948	0.119897	-5.61272	1.99e-08	3.26e-07
WBGene00000773	200.771	-0.288675	0.127458	-2.26486	0.023521	0.0539086
WBGene00000774	246.27	-0.379991	0.169393	-2.24326	0.0248803	0.0564626
WBGene00000775	825.17	-0.557561	0.178506	-3.12348	0.00178726	0.00623854
WBGene00000776	4.78042	0.351231	0.55977	0.627455	0.530361	0.62938
WBGene00000777	92.3939	0.157805	0.164121	0.961515	0.336293	0.44461
WBGene00000778	11.6588	2.17509	0.615259	3.53524	0.000407409	0.00178884
WBGene00000779	2.95771	1.5476	0.710128	2.17933	0.029307	0.0645572
WBGene00000780	5045.5	0.114244	0.0901599	1.26713	0.205109	0.303455
WBGene00000781	11.4037	1.76942	0.440396	4.01779	5.87e-05	0.00034405
WBGene00000782	2.5637	2.79747	0.891832	3.13677	0.00170822	0.00600481
WBGene00000783	14.3159	2.82829	0.377723	7.48774	7.01e-14	4.07e-12
WBGene00000784	12.2244	1.36628	0.522249	2.61614	0.00889312	0.0241454
WBGene00000785	12.2459	2.53134	0.404616	6.25615	3.95e-10	1.01e-08
WBGene00000786	22.11	1.46211	0.287652	5.08291	3.72e-07	4.3e-06
WBGene00000787	302.554	0.155488	0.0973315	1.59751	0.110153	0.185459
WBGene00000788	175.838	0.407461	0.170066	2.39589	0.0165798	0.0405212
WBGene00000789	20.1923	2.09906	0.290192	7.23335	4.71e-13	2.31e-11
WBGene00000792	13.3138	0.630201	0.300743	2.09548	0.0361284	0.0762994
WBGene00000793	45.9819	0.222867	0.172398	1.29275	0.196099	0.292737
WBGene00000794	135.389	-0.0295388	0.126919	-0.232738	0.815965	0.865709
WBGene00000795	157.25	1.97484	0.274871	7.18461	6.74e-13	3.17e-11
WBGene00000796	568.937	-0.520086	0.094766	-5.48811	4.06e-08	6.26e-07
WBGene00000797	20.0691	-0.337582	0.337826	-0.999279	0.31766	0.425166
WBGene00000798	224.761	-0.98255	0.130434	-7.53293	4.96e-14	2.94e-12
WBGene00000799	21.8775	1.62577	0.42074	3.86407	0.000111514	0.000593167
WBGene00000800	551.209	-0.355142	0.0790954	-4.49005	7.12e-06	5.51e-05
WBGene00000801	28217.9	-0.357865	0.0858198	-4.16996	3.05e-05	0.000196058
WBGene00000802	207.69	-0.790994	0.140289	-5.63833	1.72e-08	2.88e-07
WBGene00000803	224.385	0.499155	0.151785	3.28857	0.00100696	0.00383825
WBGene00000804	530.877	-0.580919	0.182028	-3.19136	0.00141603	0.00511966
WBGene00000812	603.844	-0.466144	0.096753	-4.81787	1.45e-06	1.41e-05
WBGene00000813	294.92	-0.23129	0.0931521	-2.48293	0.0130306	0.0332182
WBGene00000814	111.145	-0.349153	0.17512	-1.9938	0.0461742	0.0930894
WBGene00000815	293.778	-0.405564	0.16654	-2.43523	0.0148822	0.0370608
WBGene00000816	154.066	0.0703721	0.10813	0.650809	0.51517	0.615228
WBGene00000817	302.135	-0.359958	0.107588	-3.3457	0.000820751	0.00322572
WBGene00000818	227.892	-0.420897	0.163718	-2.57086	0.0101446	0.0269442
WBGene00000819	5029.81	-0.184056	0.149313	-1.23269	0.217693	0.31697
WBGene00000820	185.838	0.885881	0.164098	5.39848	6.72e-08	9.84e-07
WBGene00000821	815.656	0.279312	0.162687	1.71687	0.0860031	0.152352
WBGene00000822	1.26258	2.77151	1.20799	2.29432	0.0217722	0.0506047
WBGene00000829	3.74847	1.87259	0.615697	3.04141	0.0023547	0.00786077
WBGene00000830	47.6555	-0.253421	0.184745	-1.37174	0.170146	0.26243
WBGene00000831	12.2575	0.280663	0.321057	0.874185	0.382018	0.489474
WBGene00000832	26.8298	-0.247559	0.237748	-1.04127	0.297752	0.404349
WBGene00000833	174.496	-0.332864	0.141264	-2.35632	0.0184568	0.0442475
WBGene00000834	340.828	-0.230543	0.110591	-2.08466	0.0371005	0.0779481
WBGene00000835	110.628	-0.789806	0.183626	-4.30118	1.7e-05	0.000117641
WBGene00000836	488.317	-0.577361	0.156925	-3.67922	0.00023395	0.0011149
WBGene00000837	577.592	-0.453894	0.189101	-2.40028	0.0163825	0.040134
WBGene00000838	211.501	-0.213853	0.150211	-1.42369	0.154537	0.243277
WBGene00000839	639.365	-0.48545	0.104991	-4.62373	3.77e-06	3.21e-05
WBGene00000840	299.67	-0.557574	0.189639	-2.94019	0.00328008	0.0103923
WBGene00000841	14.1475	1.69062	0.379028	4.46041	8.18e-06	6.21e-05
WBGene00000843	132.549	-0.914637	0.119385	-7.66125	1.84e-14	1.18e-12
WBGene00000845	0.437989	0.104175	2.13941	0.0486933	0.961164	NA
WBGene00000846	145.173	-0.21906	0.123242	-1.77748	0.0754891	0.137442
WBGene00000851	12.2103	1.43229	0.323396	4.4289	9.47e-06	7.02e-05
WBGene00000853	1.74079	0.761612	0.872416	0.872991	0.382668	0.490115
WBGene00000854	212.084	-0.23464	0.112076	-2.09359	0.0362967	0.0765629
WBGene00000857	829.042	-0.249602	0.118648	-2.10371	0.035404	0.0750434
WBGene00000858	2.48745	1.62339	0.732805	2.2153	0.0267392	0.0598357
WBGene00000859	0	NA	NA	NA	NA	NA
WBGene00000860	0	NA	NA	NA	NA	NA
WBGene00000861	0.251528	-0.0185448	2.28563	-0.00811364	0.993526	NA
WBGene00000862	3.83315	0.621702	0.581066	1.06993	0.28465	0.390206
WBGene00000863	754.555	-0.831627	0.157608	-5.27654	1.32e-07	1.76e-06
WBGene00000864	302.766	0.372819	0.0957705	3.89284	9.91e-05	0.000536696
WBGene00000865	273.477	-0.0636673	0.165491	-0.384717	0.700447	0.774536
WBGene00000866	356.138	-0.481058	0.0984309	-4.88727	1.02e-06	1.04e-05
WBGene00000867	426.757	-0.188957	0.172739	-1.09388	0.274006	0.378795
WBGene00000868	470.605	-0.24541	0.0937249	-2.61841	0.00883408	0.0240101
WBGene00000869	71.3691	-0.135999	0.156327	-0.869965	0.38432	0.491652
WBGene00000870	42.3123	1.02357	0.294714	3.47309	0.000514511	0.00218375
WBGene00000871	684.777	-0.717249	0.102947	-6.96718	3.23e-12	1.31e-10
WBGene00000872	1390.22	-0.677807	0.128721	-5.2657	1.4e-07	1.85e-06
WBGene00000874	779.61	-0.687208	0.156715	-4.38509	1.16e-05	8.37e-05
WBGene00000875	995.524	-0.580413	0.131326	-4.41962	9.89e-06	7.28e-05
WBGene00000876	175.629	-0.313853	0.177709	-1.76611	0.0773778	0.140045
WBGene00000877	99.5824	0.0750219	0.165195	0.454141	0.649727	0.733578
WBGene00000878	74.7609	4.19973	0.575002	7.30386	2.8e-13	1.42e-11
WBGene00000879	40.882	-0.0316323	0.228184	-0.138627	0.889745	0.921285
WBGene00000880	196.892	-0.5261	0.17741	-2.96546	0.00302236	0.00970124
WBGene00000881	56.9039	0.4094	0.173209	2.36362	0.0180973	0.0435187
WBGene00000882	5.25597	0.244348	0.506516	0.482408	0.629516	0.716126
WBGene00000883	309.632	0.388256	0.125782	3.08674	0.00202365	0.00693641
WBGene00000884	38.3635	-0.397019	0.222192	-1.78683	0.0739654	0.135271
WBGene00000885	157.146	-0.0720014	0.181988	-0.395637	0.692373	0.76837
WBGene00000886	58.8972	0.185445	0.167863	1.10474	0.269271	0.373541
WBGene00000887	52.5141	0.274415	0.190992	1.43679	0.150777	0.238604
WBGene00000888	79.808	-0.0332733	0.148552	-0.223984	0.82277	0.87122
WBGene00000889	395.939	-0.749424	0.168029	-4.46007	8.19e-06	6.21e-05
WBGene00000890	298.98	-0.0282622	0.0963926	-0.293198	0.769371	0.830033
WBGene00000891	427.815	-0.47621	0.142954	-3.33121	0.00086468	0.00337939
WBGene00000892	157.163	-0.254771	0.113889	-2.23702	0.0252853	0.0572491
WBGene00000893	23.3179	0.940221	0.33161	2.83532	0.00457799	0.0137424
WBGene00000894	432.639	-0.468889	0.0892003	-5.25658	1.47e-07	1.92e-06
WBGene00000895	3.93403	0.957035	0.63222	1.51377	0.130085	0.211529
WBGene00000896	169.894	-0.596159	0.109946	-5.42231	5.88e-08	8.74e-07
WBGene00000897	39.1978	0.117092	0.19662	0.595522	0.551495	0.649075
WBGene00000898	1077.54	-0.151438	0.0981555	-1.54284	0.122869	0.202365
WBGene00000899	224.225	-0.488845	0.132602	-3.68658	0.000227292	0.00108767
WBGene00000900	25.7669	-0.457798	0.292747	-1.5638	0.117864	0.195701
WBGene00000901	26.191	0.514329	0.222108	2.31567	0.0205762	0.0483931
WBGene00000902	21.7891	1.73925	0.330005	5.27037	1.36e-07	1.81e-06
WBGene00000903	187.998	0.938622	0.120508	7.78888	6.76e-15	4.8e-13
WBGene00000904	11.7736	0.679361	0.394835	1.72062	0.0853194	0.151469
WBGene00000905	0.633493	1.74187	1.51431	1.15027	0.250032	0.352894
WBGene00000906	6.77973	0.894786	0.461903	1.93717	0.0527242	0.103256
WBGene00000907	0.840514	-0.97184	1.18589	-0.819502	0.4125	0.519495
WBGene00000908	14.9007	1.5609	0.377773	4.13186	3.6e-05	0.000226425
WBGene00000910	9.40584	0.948458	0.369269	2.56848	0.0102147	0.0271113
WBGene00000911	666.081	-0.300284	0.074412	-4.03543	5.45e-05	0.000323454
WBGene00000912	1447.7	-0.210394	0.0996794	-2.1107	0.0347978	0.0739506
WBGene00000913	795.322	-0.30077	0.0798924	-3.76469	0.000166754	0.00083766
WBGene00000914	41.9108	0.35902	0.183439	1.95717	0.0503279	0.0993979
WBGene00000915	1867.98	-1.0489	0.0753169	-13.9265	4.37e-44	4.51e-41
WBGene00000917	196.228	-0.17614	0.121714	-1.44717	0.14785	0.234957
WBGene00000920	2.80877	0.979188	0.916518	1.06838	0.28535	0.390857
WBGene00000928	0.16221	0.420737	3.08609	0.136333	0.891558	NA
WBGene00000929	4.81931	-0.69121	0.486685	-1.42024	0.155538	0.24451
WBGene00000930	0.0554478	0.901628	3.11654	0.289304	0.772349	NA
WBGene00000931	725.226	-0.741119	0.13349	-5.55188	2.83e-08	4.49e-07
WBGene00000932	0.163481	0.901628	3.11654	0.289304	0.772349	NA
WBGene00000933	234.894	-0.63365	0.147622	-4.29239	1.77e-05	0.000121706
WBGene00000934	6.42949	1.09765	0.463592	2.36771	0.0178984	0.0430986
WBGene00000935	236.054	-0.489059	0.142553	-3.43073	0.000601965	0.00248758
WBGene00000936	3.29662	0.644022	0.675079	0.953995	0.340086	0.448414
WBGene00000937	234.023	-0.285247	0.109945	-2.59444	0.00947447	0.0254575
WBGene00000938	650.853	-0.415002	0.0725868	-5.71733	1.08e-08	1.91e-07
WBGene00000939	692.566	-0.218393	0.140429	-1.55519	0.119901	0.198428
WBGene00000940	207.831	-0.314718	0.100351	-3.13616	0.00171174	0.00601565
WBGene00000941	101.969	-0.14959	0.124458	-1.20193	0.229391	0.330331
WBGene00000942	4.20717	0.122234	0.528192	0.23142	0.816988	0.866654
WBGene00000950	3.22986	1.31327	0.688263	1.90809	0.0563798	0.109053
WBGene00000951	2.50501	3.09916	0.899995	3.44353	0.000574183	0.00239449
WBGene00000952	0.604925	1.2898	1.38204	0.933257	0.350687	NA
WBGene00000953	1.11706	0.959405	1.09691	0.874641	0.381769	0.489252
WBGene00000955	1.67584	2.36905	0.97216	2.43689	0.014814	0.0369192
WBGene00000958	5.88703	3.17683	0.743814	4.271	1.95e-05	0.00013273
WBGene00000959	315.445	-0.342294	0.161136	-2.12426	0.0336488	0.0721267
WBGene00000960	1.02522	1.09514	1.10788	0.988497	0.322909	0.43058
WBGene00000961	357.181	1.59796	0.179937	8.88069	6.64e-19	8.19e-17
WBGene00000962	2891.42	-1.08528	0.140591	-7.71943	1.17e-14	7.9e-13
WBGene00000963	1.27729	0.0704917	0.962422	0.0732441	0.941612	0.959633
WBGene00000964	2.53805	0.312368	0.729146	0.428403	0.668358	0.749178
WBGene00000965	174.658	-0.212324	0.115996	-1.83044	0.0671848	0.125302
WBGene00000966	3.81531	0.839961	0.661316	1.27014	0.204036	0.302287
WBGene00000967	36.6562	0.691795	0.192159	3.60012	0.000318069	0.00144749
WBGene00000968	10.1325	1.11601	0.386344	2.88864	0.00386917	0.0119065
WBGene00000969	6.89478	0.34273	0.450957	0.760006	0.447251	0.553104
WBGene00000970	122.903	0.172437	0.181708	0.948976	0.342633	0.450771
WBGene00000971	5.73705	2.85186	0.61947	4.60371	4.15e-06	3.49e-05
WBGene00000972	43.108	1.58836	0.236542	6.71493	1.88e-11	6.5e-10
WBGene00000973	105.021	0.202487	0.20416	0.991801	0.321294	0.42883
WBGene00000974	49.5955	-0.2963	0.224792	-1.31811	0.187467	0.283195
WBGene00000975	109.489	-0.319622	0.13099	-2.44004	0.0146855	0.0366503
WBGene00000976	87.8153	-0.345943	0.137696	-2.51236	0.0119925	0.0310403
WBGene00000977	1.38741	2.02529	1.04529	1.93754	0.0526792	0.103189
WBGene00000978	0.182177	0.420738	2.97447	0.141449	0.887515	NA
WBGene00000979	0.390809	1.769	2.1043	0.840658	0.400539	NA
WBGene00000980	21.5958	-0.091706	0.24534	-0.373792	0.708559	0.781017
WBGene00000981	3.77899	2.72265	0.681888	3.99281	6.53e-05	0.000376103
WBGene00000982	83.3729	0.684142	0.1841	3.71614	0.000202289	0.000984125
WBGene00000983	1.22345	1.03631	1.02813	1.00795	0.313478	0.420316
WBGene00000984	1.46857	0.88172	0.940189	0.937812	0.348341	0.456503
WBGene00000985	92.7154	0.0789603	0.13875	0.569082	0.569301	0.66484
WBGene00000986	0.564253	1.62407	1.4474	1.12206	0.261836	NA
WBGene00000987	177.932	-0.465918	0.160359	-2.90547	0.00366707	0.0114009
WBGene00000988	9.27057	-0.383767	0.410737	-0.934336	0.350131	0.45796
WBGene00000989	5.58659	2.53215	0.570055	4.44193	8.92e-06	6.69e-05
WBGene00000990	6.96793	-0.306666	0.409208	-0.749414	0.453608	0.55891
WBGene00000991	4.22327	0.973169	0.612477	1.58891	0.112082	0.187931
WBGene00000992	3.1145	1.52248	0.66964	2.27358	0.022991	0.0529415
WBGene00000993	64.8963	0.0563945	0.198085	0.284699	0.775874	0.83479
WBGene00000994	243.669	-0.729649	0.102996	-7.08422	1.4e-12	6.05e-11
WBGene00000995	162.141	-1.28923	0.232288	-5.55013	2.85e-08	4.53e-07
WBGene00000996	115.601	0.166784	0.15811	1.05486	0.291488	0.397412
WBGene00000998	20.7393	1.06786	0.325137	3.28435	0.00102216	0.00388561
WBGene00001000	12.5723	0.772921	0.360548	2.14374	0.0320536	0.0694441
WBGene00001001	486.359	-0.36753	0.0715213	-5.13875	2.77e-07	3.34e-06
WBGene00001002	373.993	-0.368555	0.155986	-2.36275	0.0181401	0.0435949
WBGene00001005	167.704	-0.0427872	0.121148	-0.35318	0.723954	0.793878
WBGene00001006	51.5366	0.35444	0.20433	1.73465	0.0828034	0.147672
WBGene00001007	493.048	-0.547256	0.136356	-4.01345	5.98e-05	0.000349338
WBGene00001008	2482.27	-0.10623	0.0693599	-1.53158	0.125627	0.205714
WBGene00001016	910.494	-0.791787	0.16933	-4.676	2.93e-06	2.6e-05
WBGene00001017	873.23	-0.63848	0.120558	-5.29606	1.18e-07	1.6e-06
WBGene00001018	102.792	-0.580069	0.161877	-3.58339	0.00033916	0.00152906
WBGene00001019	195.119	-0.413148	0.141675	-2.91616	0.0035437	0.011086
WBGene00001020	158.154	-0.199475	0.116956	-1.70556	0.0880893	0.155242
WBGene00001021	38.7187	0.429585	0.210114	2.04453	0.0409014	0.0843688
WBGene00001022	63.073	0.295955	0.164037	1.8042	0.0712002	0.131156
WBGene00001023	452.962	-0.269974	0.0792357	-3.40723	0.000656257	0.00267471
WBGene00001025	499.973	0.373528	0.126504	2.95269	0.00315021	0.0100589
WBGene00001026	291.933	-0.0367743	0.0871288	-0.422068	0.672976	0.752963
WBGene00001027	285.926	-0.516025	0.13566	-3.80382	0.000142482	0.000734759
WBGene00001028	432.267	-0.504938	0.14057	-3.59206	0.000328069	0.00148644
WBGene00001029	379.892	-0.44276	0.143313	-3.08946	0.00200522	0.00688408
WBGene00001030	464.547	-1.08469	0.145835	-7.43779	1.02e-13	5.72e-12
WBGene00001031	503.159	-0.884552	0.121528	-7.27858	3.37e-13	1.7e-11
WBGene00001032	30.4647	-0.92084	0.28721	-3.20616	0.0013452	0.004897
WBGene00001033	36.9052	0.214114	0.223067	0.959863	0.337124	0.445407
WBGene00001034	451.698	-0.65049	0.119466	-5.445	5.18e-08	7.8e-07
WBGene00001035	244.878	-0.425467	0.100225	-4.24513	2.18e-05	0.000147212
WBGene00001036	106.362	-0.327681	0.143273	-2.2871	0.0221899	0.0513927
WBGene00001037	560.937	-0.926322	0.154391	-5.99983	1.98e-09	4.24e-08
WBGene00001038	113.661	0.682766	0.127741	5.34492	9.05e-08	1.27e-06
WBGene00001039	40.5656	0.409911	0.207424	1.9762	0.0481326	0.0960919
WBGene00001040	162.628	-0.42294	0.15078	-2.80501	0.00503148	0.0149141
WBGene00001041	329.211	-0.513081	0.0847298	-6.0555	1.4e-09	3.13e-08
WBGene00001042	2117	-0.0701014	0.0996609	-0.703399	0.481807	0.585083
WBGene00001043	233.847	-0.48606	0.169675	-2.86466	0.00417459	0.0126948
WBGene00001044	141.262	-0.146247	0.120469	-1.21398	0.224755	0.325016
WBGene00001045	28.1433	0.256299	0.220791	1.16082	0.245714	0.34856
WBGene00001046	100.915	0.1562	0.143932	1.08523	0.277819	0.382663
WBGene00001047	305.715	-0.178044	0.131703	-1.35186	0.17642	0.270215
WBGene00001048	162.685	-0.229706	0.0971878	-2.36353	0.0181017	0.0435241
WBGene00001049	806.833	-0.506652	0.1472	-3.44193	0.000577576	0.00240556
WBGene00001050	92.6293	0.354275	0.138755	2.55324	0.0106726	0.0281178
WBGene00001051	233.119	-0.165023	0.138239	-1.19375	0.232574	0.333762
WBGene00001052	0.883861	1.35671	1.27065	1.06772	0.285645	0.39105
WBGene00001053	1.25167	1.01234	0.981116	1.03182	0.302155	0.408686
WBGene00001054	0.910905	0.284487	1.32568	0.214597	0.830081	0.876605
WBGene00001055	1.07094	-0.0740406	1.27632	-0.058011	0.95374	0.968217
WBGene00001056	293.189	-0.298752	0.0985808	-3.03053	0.00244126	0.00809458
WBGene00001057	178.984	-0.150044	0.10703	-1.40189	0.160947	0.251288
WBGene00001058	260.955	-0.529029	0.158206	-3.34392	0.000826024	0.00324254
WBGene00001059	2.66061	0.852907	0.680418	1.25351	0.210022	0.308677
WBGene00001060	366.248	-0.721901	0.151761	-4.75682	1.97e-06	1.85e-05
WBGene00001061	462.452	-0.431102	0.1277	-3.37591	0.00073572	0.00293988
WBGene00001062	0.513967	0.450289	1.79437	0.250945	0.801857	NA
WBGene00001063	25.6296	2.08805	0.388574	5.37363	7.72e-08	1.1e-06
WBGene00001064	0.795386	0.651723	1.3116	0.496891	0.619266	0.707094
WBGene00001065	1.65886	-0.0511355	0.948401	-0.0539176	0.957001	0.97012
WBGene00001066	11.5029	0.23702	0.365058	0.649265	0.516167	0.616006
WBGene00001067	0.9168	-0.436323	1.20202	-0.362991	0.716611	0.787545
WBGene00001068	2.80624	0.663025	0.641642	1.03333	0.301452	0.408128
WBGene00001069	0.494571	1.79897	1.77174	1.01537	0.309928	NA
WBGene00001070	3.37228	2.56441	0.847286	3.02662	0.00247308	0.00818208
WBGene00001071	4.82241	0.902446	0.527173	1.71186	0.0869226	0.153578
WBGene00001072	94.5982	0.111982	0.219364	0.510483	0.609713	0.698914
WBGene00001073	131.171	0.225398	0.133576	1.68741	0.0915244	0.159879
WBGene00001074	11.6496	-0.386664	0.319847	-1.2089	0.2267	0.327129
WBGene00001075	2.80265	0.457954	0.68502	0.668526	0.503798	0.605225
WBGene00001076	3.91802	1.34295	0.549037	2.44602	0.0144444	0.0361544
WBGene00001077	11.3456	-1.09595	0.368125	-2.97711	0.00290978	0.00939531
WBGene00001078	6.21117	-0.371361	0.464299	-0.799831	0.423809	0.531211
WBGene00001079	0.480809	0.0737261	1.62795	0.0452877	0.963878	NA
WBGene00001080	600.378	-0.688364	0.146051	-4.71319	2.44e-06	2.22e-05
WBGene00001081	224.645	0.0511088	0.148851	0.343355	0.731332	0.799775
WBGene00001082	49.597	0.597598	0.170765	3.49954	0.000466064	0.00200073
WBGene00001085	1068.97	-0.641024	0.185186	-3.46151	0.000537147	0.00226803
WBGene00001086	132.983	-0.48225	0.175249	-2.7518	0.00592695	0.0171456
WBGene00001087	391.405	-0.367544	0.117813	-3.11973	0.00181017	0.00630837
WBGene00001088	162.513	-0.0735248	0.124777	-0.589249	0.555694	0.652489
WBGene00001089	48.9559	0.259768	0.368473	0.704987	0.480818	0.584288
WBGene00001090	568.011	-0.446816	0.158071	-2.82667	0.00470343	0.0140565
WBGene00001091	65.8286	-0.225086	0.166883	-1.34876	0.177413	0.271438
WBGene00001092	344.457	-0.828384	0.159812	-5.1835	2.18e-07	2.72e-06
WBGene00001093	855.651	-0.433547	0.114209	-3.79609	0.000146999	0.000753686
WBGene00001094	271.839	-0.254497	0.102265	-2.48859	0.0128251	0.032788
WBGene00001095	159.68	-0.559922	0.173064	-3.23534	0.00121497	0.00449982
WBGene00001096	0.543927	0.769473	1.58023	0.486938	0.626302	NA
WBGene00001099	24.6223	2.03983	0.312391	6.52973	6.59e-11	2.04e-09
WBGene00001101	69.6152	0.506987	0.185713	2.72996	0.00633427	0.0181154
WBGene00001102	596.179	-0.889148	0.181496	-4.89898	9.63e-07	9.93e-06
WBGene00001103	3.93446	0.199524	0.599459	0.332841	0.739255	0.805832
WBGene00001104	6.34457	-0.147866	0.482013	-0.306768	0.75902	0.822051
WBGene00001105	5.91786	1.3296	0.570611	2.33013	0.0197993	0.046915
WBGene00001106	0.380805	2.26696	1.80316	1.25722	0.208676	NA
WBGene00001107	0.692511	1.99626	1.34331	1.48608	0.137259	0.22103
WBGene00001108	1.52258	-0.208708	0.877285	-0.237902	0.811957	0.862859
WBGene00001109	0.411748	0.795571	1.64777	0.482817	0.629225	NA
WBGene00001110	1436.85	-0.715326	0.176843	-4.04499	5.23e-05	0.000312457
WBGene00001111	2621.24	-0.25475	0.115649	-2.2028	0.0276092	0.0614178
WBGene00001112	735.499	-0.275259	0.0687147	-4.00582	6.18e-05	0.000358552
WBGene00001113	2.80153	-0.656095	0.681158	-0.963205	0.335445	0.44378
WBGene00001115	17.4428	0.555284	0.280581	1.97905	0.0478101	0.0956105
WBGene00001116	4.21296	2.00525	0.671377	2.98678	0.00281933	0.00914997
WBGene00001117	5.10663	1.69691	0.699842	2.4247	0.0153209	0.0379844
WBGene00001118	93.0423	0.561675	0.1441	3.8978	9.71e-05	0.000527353
WBGene00001119	851.967	-0.282701	0.118661	-2.38242	0.0171994	0.0417541
WBGene00001121	2.99462	-0.601121	0.683793	-0.879098	0.379348	0.486913
WBGene00001122	3.89472	0.363498	0.615256	0.590807	0.554649	0.651688
WBGene00001123	0.715884	1.79331	1.37722	1.30212	0.192874	0.289197
WBGene00001127	0.911375	-0.976896	1.2289	-0.794933	0.426653	0.53382
WBGene00001129	6.74815	1.30574	0.532695	2.4512	0.0142382	0.0357386
WBGene00001130	142.441	0.449757	0.210899	2.13257	0.0329597	0.0709834
WBGene00001131	1031.94	0.125265	0.123765	1.01212	0.311481	0.418296
WBGene00001132	20.8462	2.59351	0.326857	7.93469	2.11e-15	1.7e-13
WBGene00001133	1.14967	1.69451	1.09964	1.54096	0.123325	0.202912
WBGene00001134	795.794	-0.558731	0.117962	-4.73655	2.17e-06	2.02e-05
WBGene00001135	2.75021	1.21039	0.724125	1.67153	0.0946177	0.1643
WBGene00001136	19.1263	0.715377	0.313007	2.2855	0.0222836	0.0515609
WBGene00001137	415.182	-0.344405	0.071965	-4.78572	1.7e-06	1.63e-05
WBGene00001145	392.757	0.0667255	0.182881	0.364858	0.715217	0.786367
WBGene00001147	0	NA	NA	NA	NA	NA
WBGene00001148	49.6357	0.913803	0.360354	2.53585	0.0112176	0.0293485
WBGene00001149	13.3719	1.43616	0.42927	3.3456	0.000821058	0.00322628
WBGene00001150	2.06362	2.28551	0.835141	2.73667	0.00620645	0.0178174
WBGene00001151	128.422	-0.307657	0.173068	-1.77767	0.0754588	0.137425
WBGene00001152	46.9345	0.454341	0.202724	2.24118	0.0250142	0.0567271
WBGene00001153	146.073	-0.196211	0.118231	-1.65955	0.097005	0.167673
WBGene00001154	86.0319	0.0648533	0.203612	0.318514	0.750095	0.814748
WBGene00001155	71.9955	0.0788025	0.210119	0.375037	0.707633	0.780323
WBGene00001156	1.33032	0.815853	1.24896	0.653225	0.513611	0.613853
WBGene00001157	3.27744	2.51967	0.758091	3.32371	0.00088829	0.00345856
WBGene00001158	0.563317	0.750542	1.59753	0.469814	0.638488	NA
WBGene00001159	1.54447	2.45567	1.01339	2.42322	0.0153835	0.0380913
WBGene00001160	319.742	-0.580475	0.125	-4.64378	3.42e-06	2.96e-05
WBGene00001161	186.01	-0.154464	0.133219	-1.15947	0.246264	0.349087
WBGene00001162	171.68	-0.103124	0.126246	-0.816846	0.414016	0.521104
WBGene00001163	11.2859	0.365859	0.355903	1.02797	0.303962	0.410506
WBGene00001164	2.74718	1.25519	0.70211	1.78773	0.0738189	0.135053
WBGene00001165	6.27059	0.508081	0.47283	1.07455	0.282575	0.387904
WBGene00001166	535.428	-0.360693	0.157153	-2.29517	0.0217232	0.0505087
WBGene00001167	868.461	-0.348761	0.0774641	-4.50222	6.72e-06	5.27e-05
WBGene00001168	428.139	0.30628	0.0877808	3.48915	0.000484567	0.00207302
WBGene00001169	54.5912	1.5779	0.227795	6.92684	4.3e-12	1.71e-10
WBGene00001170	10.699	-0.340246	0.37565	-0.905752	0.365067	0.472764
WBGene00001171	27.8802	0.848027	0.288346	2.94101	0.00327143	0.0103666
WBGene00001172	8.97569	1.18691	0.369182	3.21498	0.00130455	0.00477922
WBGene00001173	280.216	0.309242	0.126053	2.45328	0.0141561	0.03556
WBGene00001174	9.7085	1.09886	0.417199	2.63391	0.00844078	0.0231342
WBGene00001175	5.16336	-0.0229731	0.475272	-0.0483368	0.961448	0.972615
WBGene00001177	303.858	0.33184	0.139969	2.37081	0.0177492	0.0428184
WBGene00001178	181.38	-0.0795887	0.21161	-0.37611	0.706835	0.779643
WBGene00001179	96.0816	0.119713	0.17466	0.685406	0.493088	0.595498
WBGene00001182	9.29853	1.61013	0.392886	4.09822	4.16e-05	0.000256484
WBGene00001184	1.31574	0.697209	1.08363	0.6434	0.519964	0.619604
WBGene00001185	0.518246	1.31574	1.59931	0.822692	0.410683	NA
WBGene00001186	31.5274	-0.938388	0.240289	-3.90524	9.41e-05	0.000513522
WBGene00001187	9.64583	0.72973	0.387819	1.88163	0.0598867	0.114347
WBGene00001188	765.804	0.0228016	0.134853	0.169084	0.86573	0.902962
WBGene00001189	421.995	0.219633	0.144929	1.51545	0.129658	0.211045
WBGene00001190	5.42456	1.84583	0.50892	3.62696	0.000286773	0.00132444
WBGene00001193	36.3786	0.0103618	0.198236	0.0522698	0.958314	0.970798
WBGene00001194	735.386	-0.848935	0.120641	-7.0369	1.97e-12	8.34e-11
WBGene00001196	844.843	-0.247971	0.088001	-2.81783	0.004835	0.0143926
WBGene00001202	8.20704	1.99321	0.434754	4.58469	4.55e-06	3.78e-05
WBGene00001204	21.1688	-0.277978	0.24198	-1.14876	0.250654	0.353343
WBGene00001207	1.94615	1.8917	0.921481	2.05289	0.0400837	0.0829937
WBGene00001208	16.7586	2.77497	0.428795	6.47155	9.7e-11	2.88e-09
WBGene00001209	573.575	-0.672168	0.160924	-4.17691	2.95e-05	0.000191103
WBGene00001210	0.235022	1.43352	2.7585	0.519673	0.603292	NA
WBGene00001211	1.31308	3.39238	1.27815	2.65413	0.00795138	0.0219923
WBGene00001214	1412.18	-0.800197	0.151821	-5.27067	1.36e-07	1.81e-06
WBGene00001215	4452.44	-0.316807	0.0919999	-3.44356	0.00057411	0.00239449
WBGene00001223	0.618746	0.0839953	1.55049	0.0541733	0.956797	0.970064
WBGene00001224	356.163	-0.666866	0.164463	-4.05482	5.02e-05	0.000301263
WBGene00001225	533.693	-0.779478	0.155683	-5.00683	5.53e-07	6.1e-06
WBGene00001226	771.861	-0.620372	0.127951	-4.84851	1.24e-06	1.24e-05
WBGene00001227	264.093	-0.624466	0.165098	-3.7824	0.000155324	0.000788532
WBGene00001228	356.663	-0.637959	0.114333	-5.57985	2.41e-08	3.87e-07
WBGene00001229	237.296	-0.0720784	0.102709	-0.701774	0.48282	0.585914
WBGene00001230	304.345	-0.553848	0.131361	-4.21622	2.48e-05	0.000164693
WBGene00001231	191.917	-0.178002	0.13691	-1.30014	0.193554	0.289865
WBGene00001232	317.17	-0.550282	0.14155	-3.88755	0.000101261	0.000546617
WBGene00001233	196.226	-0.131339	0.133257	-0.9856	0.32433	0.43203
WBGene00001234	280.588	-0.426428	0.0952871	-4.47519	7.63e-06	5.84e-05
WBGene00001235	368.047	-0.408473	0.104944	-3.89228	9.93e-05	0.000537421
WBGene00001236	151.642	-0.72227	0.169949	-4.24992	2.14e-05	0.000144304
WBGene00001237	11.1489	1.03309	0.347816	2.97022	0.00297586	0.00958338
WBGene00001239	75.626	-0.028241	0.159809	-0.176717	0.85973	0.898043
WBGene00001240	9.06004	0.377698	0.408645	0.924269	0.355346	0.463078
WBGene00001241	140.583	-0.372712	0.114324	-3.26015	0.00111352	0.00417138
WBGene00001242	7.93667	0.331369	0.434765	0.76218	0.445952	0.551802
WBGene00001243	27.2429	1.11352	0.284984	3.9073	9.33e-05	0.000509449
WBGene00001244	52.0552	-0.0513924	0.184669	-0.278295	0.780786	0.838923
WBGene00001245	3.11971	2.55679	0.744879	3.43249	0.00059807	0.00247514
WBGene00001246	9.64118	2.33116	0.432001	5.39618	6.81e-08	9.94e-07
WBGene00001247	834.179	-1.04467	0.14053	-7.43378	1.06e-13	5.88e-12
WBGene00001248	9.28884	1.65871	0.442217	3.75089	0.000176208	0.00087493
WBGene00001249	39.1327	0.0306483	0.197036	0.155547	0.87639	0.911503
WBGene00001250	2.79025	2.69315	0.774788	3.47599	0.000508969	0.0021621
WBGene00001251	2.90873	1.67167	0.689658	2.42391	0.0153543	0.0380383
WBGene00001252	0.753893	1.52149	1.36665	1.1133	0.26558	0.369808
WBGene00001253	11.6912	0.982908	0.346347	2.83793	0.00454067	0.0136471
WBGene00001258	423.878	-0.111822	0.116256	-0.961861	0.336119	0.44441
WBGene00001259	914.83	-0.76074	0.124218	-6.12424	9.11e-10	2.15e-08
WBGene00001262	331.957	-0.177244	0.10427	-1.69986	0.0891565	0.156696
WBGene00001263	44.714	0.743524	0.265741	2.79793	0.0051432	0.0152082
WBGene00001281	664.942	-0.160846	0.1231	-1.30663	0.191339	0.287525
WBGene00001284	776.758	-0.473289	0.112309	-4.21416	2.51e-05	0.00016593
WBGene00001303	85.9835	-0.779722	0.193307	-4.0336	5.49e-05	0.000325385
WBGene00001309	163.319	-0.163386	0.136074	-1.20071	0.229862	0.330815
WBGene00001310	51.5683	0.197216	0.221548	0.890173	0.373373	0.481071
WBGene00001311	17.5702	-0.133052	0.282083	-0.471676	0.637158	0.722946
WBGene00001320	149.868	-0.102042	0.10346	-0.986298	0.323987	0.431705
WBGene00001324	273.38	-0.167811	0.0917212	-1.82958	0.0673131	0.125458
WBGene00001325	54.3214	0.503602	0.239574	2.10207	0.0355471	0.0752898
WBGene00001328	12.2989	0.54236	0.375238	1.44538	0.148352	0.235622
WBGene00001329	90.0348	-0.0403498	0.192153	-0.209988	0.833677	0.879122
WBGene00001330	174.161	-0.276173	0.167833	-1.64552	0.0998625	0.171643
WBGene00001331	17.3423	0.579677	0.294144	1.97073	0.0487551	0.0970645
WBGene00001332	273.366	-0.20161	0.114186	-1.76563	0.0774581	0.140154
WBGene00001333	288.25	-0.224644	0.10568	-2.1257	0.0335282	0.0718997
WBGene00001334	88.711	0.243443	0.152617	1.59512	0.110686	0.186148
WBGene00001335	88.6846	0.270764	0.200518	1.35032	0.176913	0.270864
WBGene00001336	316.249	-0.280113	0.12685	-2.20823	0.0272282	0.0607081
WBGene00001337	416.133	-0.364299	0.114394	-3.18459	0.00144959	0.00522365
WBGene00001338	131.711	-0.0422099	0.113963	-0.370383	0.711097	0.783198
WBGene00001340	216.402	-0.331603	0.148356	-2.23518	0.0254056	0.0574419
WBGene00001345	12.8025	1.09386	0.33783	3.23791	0.0012041	0.00446376
WBGene00001352	444.646	-0.401413	0.105814	-3.79356	0.000148503	0.000760207
WBGene00001358	119.706	-0.584144	0.192712	-3.03117	0.00243605	0.00808005
WBGene00001365	110.091	-0.574426	0.162145	-3.54267	0.000396094	0.00174738
WBGene00001366	3.70898	1.09273	0.605542	1.80455	0.071145	0.131091
WBGene00001368	234.076	0.0807852	0.138528	0.583168	0.55978	0.656539
WBGene00001371	124.337	-0.322829	0.153452	-2.10378	0.0353976	0.0750379
WBGene00001372	342.8	-0.82316	0.200501	-4.10553	4.03e-05	0.000249367
WBGene00001373	0.960221	2.45126	1.16389	2.10609	0.0351967	0.0746795
WBGene00001374	1.00162	3.00584	1.21737	2.46913	0.0135444	0.0342781
WBGene00001377	11.5807	0.977116	0.381714	2.55981	0.0104729	0.0276773
WBGene00001385	0.565574	0.47042	1.44266	0.326078	0.744365	NA
WBGene00001386	0.738697	0.900814	1.2973	0.694375	0.487447	0.590067
WBGene00001387	0.417871	1.10871	1.8219	0.608547	0.542825	NA
WBGene00001388	0.148325	1.43582	3.1122	0.461351	0.644546	NA
WBGene00001389	0.622799	1.08321	1.48183	0.730995	0.464782	0.569277
WBGene00001390	0.60884	1.64804	1.79546	0.917896	0.358673	0.466425
WBGene00001391	0.514682	1.28497	1.48395	0.865916	0.386536	NA
WBGene00001392	37.3692	0.159859	0.287351	0.556319	0.577993	0.672387
WBGene00001393	141.592	-0.201279	0.133555	-1.50709	0.131788	0.213838
WBGene00001394	209.378	-0.036407	0.182253	-0.199761	0.841668	0.88474
WBGene00001395	10.3136	1.63627	0.394802	4.14452	3.41e-05	0.000215887
WBGene00001396	126.121	-0.486634	0.175638	-2.77067	0.00559417	0.0163349
WBGene00001397	0.872129	1.58027	1.25626	1.25792	0.208421	0.307061
WBGene00001398	4.52267	2.43541	0.700332	3.47751	0.000506089	0.00215079
WBGene00001399	0.786863	1.85513	1.47578	1.25705	0.208735	0.307315
WBGene00001400	1.24871	1.42489	1.06718	1.33519	0.181815	0.276833
WBGene00001401	627.483	-0.530745	0.139233	-3.81193	0.000137887	0.000715047
WBGene00001402	772.543	-0.566348	0.135176	-4.18972	2.79e-05	0.000181981
WBGene00001403	3.76322	1.88873	0.621876	3.03716	0.00238822	0.00795369
WBGene00001404	85.5145	-0.351035	0.13834	-2.53749	0.011165	0.0292461
WBGene00001405	55.8452	-0.100834	0.170723	-0.590627	0.554771	0.651688
WBGene00001406	415.242	-0.378278	0.103876	-3.64162	0.000270924	0.00126315
WBGene00001410	5.56343	0.701181	0.495951	1.41381	0.157418	0.246919
WBGene00001411	499.604	-0.515235	0.0873668	-5.89738	3.69e-09	7.35e-08
WBGene00001412	229.755	-0.290019	0.116665	-2.48591	0.0129222	0.0329846
WBGene00001413	88.5576	-0.369155	0.156671	-2.35625	0.0184604	0.0442507
WBGene00001414	93.5028	-0.0715168	0.1619	-0.441735	0.658681	0.741157
WBGene00001423	1288.96	-1.08326	0.149062	-7.26715	3.67e-13	1.85e-11
WBGene00001424	1.31498	2.28125	1.26243	1.80702	0.0707588	0.130503
WBGene00001425	17.0181	0.395712	0.301534	1.31233	0.189409	0.285381
WBGene00001426	277.483	-0.135024	0.121417	-1.11208	0.266106	0.370277
WBGene00001427	1039.2	-0.159941	0.136796	-1.1692	0.242324	0.34485
WBGene00001428	3.61698	0.676791	0.64607	1.04755	0.294846	0.401152
WBGene00001429	0.619358	0.18634	1.36571	0.136442	0.891472	0.922495
WBGene00001430	158.625	-0.214192	0.292456	-0.732389	0.463931	0.568437
WBGene00001431	433.888	-0.932452	0.163748	-5.69444	1.24e-08	2.16e-07
WBGene00001432	2.70996	-0.752653	0.709814	-1.06035	0.288984	0.394877
WBGene00001433	24230.1	-0.316337	0.0864849	-3.65772	0.000254468	0.00119754
WBGene00001434	3.72448	1.62249	0.778534	2.08404	0.0371569	0.0780414
WBGene00001435	17.9647	-1.88789	0.385519	-4.89699	9.73e-07	1e-05
WBGene00001436	17.1629	-2.07854	0.386946	-5.37167	7.8e-08	1.11e-06
WBGene00001437	3.70994	0.299628	0.551106	0.543684	0.586659	0.680005
WBGene00001438	0.448908	1.09509	1.62208	0.675114	0.499603	NA
WBGene00001439	34.0471	0.197572	0.204402	0.966586	0.333751	0.442037
WBGene00001440	10.5994	0.763093	0.361405	2.11146	0.0347324	0.0738356
WBGene00001441	26.6751	2.77413	0.315806	8.78428	1.57e-18	1.85e-16
WBGene00001442	7.56241	0.00319879	0.459071	0.00696796	0.99444	0.99622
WBGene00001443	540.355	-0.457302	0.134938	-3.38899	0.000701517	0.00282626
WBGene00001444	2.73668	1.05239	0.799885	1.31567	0.188284	0.284254
WBGene00001445	0	NA	NA	NA	NA	NA
WBGene00001446	0.339852	0.871911	2.10439	0.414331	0.678632	NA
WBGene00001447	0.949458	0.889631	1.50962	0.589308	0.555655	0.652481
WBGene00001448	0.263872	-0.412506	2.76318	-0.149286	0.881328	NA
WBGene00001449	0.182177	0.420738	2.97447	0.141449	0.887515	NA
WBGene00001450	0.285795	1.9126	2.63569	0.725653	0.468052	NA
WBGene00001451	1.45844	1.62777	1.00041	1.6271	0.103715	0.176777
WBGene00001452	10.8637	0.752529	0.33487	2.24723	0.0246254	0.0560269
WBGene00001453	5.29355	0.491218	0.535012	0.918143	0.358544	0.466319
WBGene00001454	0.0793129	-0.0601574	3.11654	-0.0193026	0.9846	NA
WBGene00001455	0.24848	1.24527	2.32552	0.53548	0.592318	NA
WBGene00001456	3.02293	0.175875	0.698517	0.251783	0.801209	0.854588
WBGene00001457	8.55116	1.7565	0.462544	3.79747	0.000146178	0.000750768
WBGene00001458	0.325692	0.945358	2.19095	0.431483	0.666117	NA
WBGene00001459	1343.23	-0.360366	0.105161	-3.42681	0.000610715	0.00251631
WBGene00001460	0.56016	2.73128	2.31859	1.17799	0.238802	NA
WBGene00001461	1.96283	1.20402	0.882913	1.36369	0.172666	0.265733
WBGene00001462	1.65306	1.39915	0.983544	1.42256	0.154863	0.243634
WBGene00001463	0.0767846	0.901628	3.11654	0.289304	0.772349	NA
WBGene00001464	0.200709	-0.611722	2.91335	-0.209972	0.83369	NA
WBGene00001465	5.50602	1.01973	0.527359	1.93365	0.0531556	0.103966
WBGene00001466	2.39587	0.838017	0.972354	0.861844	0.388773	0.49616
WBGene00001468	36.8989	1.64418	0.315372	5.21346	1.85e-07	2.37e-06
WBGene00001470	99.8983	-0.914374	0.263329	-3.47237	0.00051589	0.00218818
WBGene00001475	9.9943	1.38985	0.433151	3.20869	0.00133339	0.00486213
WBGene00001476	6.77282	0.702568	0.492377	1.42689	0.153611	0.24215
WBGene00001477	2.10215	0.829225	0.952869	0.870241	0.384169	0.491555
WBGene00001478	34.2889	1.17235	0.241	4.86455	1.15e-06	1.15e-05
WBGene00001479	6.12541	1.64056	0.471172	3.48187	0.000497931	0.00212282
WBGene00001480	1122.97	0.0283086	0.12898	0.21948	0.826276	0.873716
WBGene00001481	103.104	0.112464	0.191682	0.586721	0.557391	0.654089
WBGene00001482	89.8652	-0.145525	0.137316	-1.05978	0.289245	0.395143
WBGene00001483	4.44677	1.13807	0.651091	1.74794	0.0804742	0.144345
WBGene00001484	18.964	-0.658154	0.296304	-2.22121	0.0263369	0.0591244
WBGene00001485	434.564	-0.33709	0.0812815	-4.14719	3.37e-05	0.000213862
WBGene00001486	34.4492	0.421002	0.196569	2.14175	0.0322133	0.069767
WBGene00001487	3.78702	1.51643	0.668952	2.26687	0.023398	0.0536769
WBGene00001488	8139.37	-0.146788	0.0699187	-2.0994	0.0357814	0.0756797
WBGene00001489	50.6022	0.892059	0.399078	2.2353	0.0253977	0.0574419
WBGene00001490	4.45378	0.62599	0.527179	1.18743	0.235057	0.336733
WBGene00001491	258.905	-0.373711	0.127763	-2.92504	0.0034441	0.0108314
WBGene00001492	29.1194	0.583537	0.220961	2.6409	0.00826855	0.022722
WBGene00001493	130.659	0.94712	0.155064	6.10793	1.01e-09	2.34e-08
WBGene00001494	46.6356	1.00085	0.25695	3.89509	9.82e-05	0.000532695
WBGene00001495	6.3298	1.21733	0.60807	2.00196	0.0452891	0.091635
WBGene00001496	299.024	0.196628	0.0939647	2.09257	0.0363873	0.0767129
WBGene00001497	309.613	-0.784092	0.187159	-4.18944	2.8e-05	0.000182114
WBGene00001498	290.417	-0.265662	0.124764	-2.12932	0.033228	0.0714277
WBGene00001499	193.56	-0.376914	0.111622	-3.37669	0.000733634	0.00293437
WBGene00001500	1.56067	1.2867	0.901524	1.42725	0.153507	0.242064
WBGene00001501	16.4358	1.38811	0.328255	4.22876	2.35e-05	0.00015657
WBGene00001502	27.7144	-0.168072	0.228098	-0.736842	0.461218	0.56608
WBGene00001503	273.439	-0.0783872	0.123362	-0.635423	0.525153	0.624637
WBGene00001505	10.8855	2.80389	0.440094	6.37113	1.88e-10	5.23e-09
WBGene00001506	1.60516	0.735883	0.871199	0.844679	0.39829	0.505466
WBGene00001507	0.158323	0.8119	3.11379	0.260743	0.794291	NA
WBGene00001508	3.12888	1.91411	0.817851	2.34041	0.0192625	0.0458649
WBGene00001509	718.946	-0.695701	0.165401	-4.20614	2.6e-05	0.000171219
WBGene00001510	641.208	-0.334704	0.0843982	-3.96577	7.32e-05	0.000414465
WBGene00001511	570.416	-0.572216	0.107406	-5.32759	9.95e-08	1.38e-06
WBGene00001512	1.5342	2.10719	1.1091	1.89991	0.0574446	0.110698
WBGene00001513	510.505	-0.324287	0.143206	-2.26449	0.0235441	0.0539489
WBGene00001514	411.493	-0.225713	0.0990307	-2.27923	0.0226537	0.052306
WBGene00001515	11.5877	1.2753	0.381267	3.34489	0.000823161	0.0032326
WBGene00001516	49.3756	-0.581422	0.178809	-3.25164	0.00114742	0.00428364
WBGene00001517	3.16783	1.56319	0.706782	2.2117	0.0269872	0.0602805
WBGene00001518	7.82552	1.05304	0.46914	2.24461	0.0247931	0.0563169
WBGene00001519	1.04014	1.16689	1.20754	0.966331	0.333879	0.442133
WBGene00001520	166.761	0.344155	0.291868	1.17915	0.23834	0.340317
WBGene00001522	110.34	-0.642668	0.198311	-3.24071	0.00119231	0.00442761
WBGene00001523	830.765	0.0449651	0.133031	0.338004	0.73536	0.802748
WBGene00001526	887.908	-0.573249	0.14735	-3.89038	0.000100086	0.000540747
WBGene00001527	315.848	0.174072	0.103644	1.67953	0.0930495	0.162109
WBGene00001528	1.42297	2.2376	0.951707	2.35114	0.018716	0.0447485
WBGene00001529	4.23648	2.03365	0.625682	3.2503	0.00115282	0.00430054
WBGene00001530	2.81085	1.48761	0.686454	2.1671	0.0302275	0.0662423
WBGene00001531	1.62956	1.83163	0.907254	2.01887	0.0435003	0.0887741
WBGene00001532	0.721795	2.58152	1.46811	1.75839	0.0786807	0.141855
WBGene00001533	5.70086	1.31577	0.497381	2.64539	0.00815963	0.0224668
WBGene00001534	0.991022	2.10734	1.38992	1.51616	0.129479	0.210789
WBGene00001535	155.932	0.485458	0.212544	2.28404	0.0223693	0.0517177
WBGene00001536	1.26545	2.36792	1.15447	2.05109	0.0402579	0.0833044
WBGene00001537	3.78858	1.40295	0.663715	2.11378	0.0345339	0.0735253
WBGene00001538	10.5884	1.24279	0.370407	3.35522	0.000793033	0.00313691
WBGene00001539	0.283702	0.483097	1.96121	0.246326	0.80543	NA
WBGene00001540	1.6332	1.69602	1.00278	1.69131	0.0907769	0.158799
WBGene00001541	6.8433	1.64617	0.552395	2.98006	0.0028819	0.00931603
WBGene00001542	0.979688	1.62337	1.45088	1.11888	0.26319	0.367263
WBGene00001543	13.9401	0.400205	0.349887	1.14381	0.252702	0.355795
WBGene00001544	13.931	3.83185	0.592882	6.4631	1.03e-10	3.02e-09
WBGene00001545	0.33915	0.857008	1.69918	0.504367	0.614004	NA
WBGene00001546	5.82459	1.2845	0.676161	1.89969	0.0574733	0.110742
WBGene00001547	4.26863	2.35092	0.63647	3.69369	0.000221024	0.00106078
WBGene00001548	103.76	0.544853	0.56452	0.965161	0.334464	0.442789
WBGene00001549	2.2176	0.188013	0.946946	0.198546	0.842618	0.885501
WBGene00001550	0.615867	1.67641	1.5504	1.08128	0.279573	0.384511
WBGene00001551	1.39455	0.978443	0.967278	1.01154	0.311757	0.418581
WBGene00001552	0.22511	1.82044	2.82936	0.64341	0.519958	NA
WBGene00001553	12.3886	0.760249	0.336092	2.26203	0.0236959	0.0542331
WBGene00001554	0.856391	2.86728	1.27769	2.24412	0.0248249	0.0563654
WBGene00001555	139.691	-0.386668	0.191691	-2.01714	0.0436804	0.0890698
WBGene00001556	2.73057	1.06402	0.776523	1.37023	0.170614	0.262986
WBGene00001557	0.998493	0.873297	1.51524	0.576344	0.564383	0.66055
WBGene00001558	442.347	-0.000745991	0.134645	-0.00554042	0.995579	0.99715
WBGene00001559	21.201	1.66986	0.28225	5.91625	3.29e-09	6.63e-08
WBGene00001560	25.3167	1.28231	0.273744	4.68434	2.81e-06	2.5e-05
WBGene00001561	609.761	-0.398476	0.0967639	-4.11803	3.82e-05	0.000238465
WBGene00001562	130.186	-0.15262	0.130583	-1.16876	0.242502	0.344902
WBGene00001563	1072.48	-0.772988	0.143859	-5.37322	7.73e-08	1.11e-06
WBGene00001564	15.0849	0.904401	0.311614	2.90231	0.00370417	0.0114962
WBGene00001565	114.007	-0.999025	0.204447	-4.88647	1.03e-06	1.04e-05
WBGene00001566	498.159	-0.523096	0.157125	-3.32916	0.000871076	0.003401
WBGene00001568	704.351	-0.808609	0.185793	-4.3522	1.35e-05	9.53e-05
WBGene00001569	231.898	-0.114463	0.157358	-0.727406	0.466977	0.571195
WBGene00001570	9.58716	2.08371	0.44463	4.68639	2.78e-06	2.48e-05
WBGene00001571	788.699	-0.636093	0.122961	-5.17313	2.3e-07	2.85e-06
WBGene00001572	2.58329	1.01089	0.854713	1.18272	0.236918	0.338781
WBGene00001574	219.343	-0.145182	0.115931	-1.25232	0.210453	0.309125
WBGene00001575	1.35724	0.986114	0.986687	0.99942	0.317591	0.425133
WBGene00001577	17.4131	1.8388	0.320558	5.73624	9.68e-09	1.74e-07
WBGene00001578	5.3784	1.74943	0.587532	2.97759	0.00290523	0.00938371
WBGene00001579	88.7206	-0.52594	0.219211	-2.39924	0.0164291	0.040208
WBGene00001580	1044.2	-0.842216	0.0974346	-8.6439	5.43e-18	6.15e-16
WBGene00001581	50.1163	1.21407	0.293181	4.14102	3.46e-05	0.000218637
WBGene00001582	176.842	0.201046	0.133582	1.50504	0.132314	0.214528
WBGene00001583	558.394	0.486091	0.13155	3.6951	0.000219805	0.00105634
WBGene00001584	284.035	-0.697045	0.178386	-3.90751	9.33e-05	0.000509309
WBGene00001585	178.933	-0.686881	0.149505	-4.59436	4.34e-06	3.63e-05
WBGene00001586	2.08602	3.51086	1.08622	3.23217	0.00122853	0.00454317
WBGene00001587	0.883748	1.01076	1.15186	0.877502	0.380214	0.487832
WBGene00001588	0.235022	1.43352	2.7585	0.519673	0.603292	NA
WBGene00001589	369.889	-0.483697	0.142455	-3.39542	0.000685226	0.00277408
WBGene00001590	24.8776	0.0259564	0.241489	0.107485	0.914404	0.93938
WBGene00001591	1.93023	2.30903	0.897012	2.57414	0.0100491	0.0267471
WBGene00001592	0.779374	0.38419	1.31526	0.292102	0.770209	0.830747
WBGene00001593	5.14931	2.53459	0.676465	3.74683	0.000179086	0.000887103
WBGene00001594	0.478557	-0.438943	1.75601	-0.249967	0.802613	NA
WBGene00001595	466.192	-0.570368	0.110115	-5.17975	2.22e-07	2.77e-06
WBGene00001596	702.332	-0.504812	0.141071	-3.57842	0.000345681	0.00155518
WBGene00001597	408.577	-0.204464	0.0915973	-2.2322	0.0256016	0.0578181
WBGene00001598	1950.43	-0.804301	0.149742	-5.37126	7.82e-08	1.11e-06
WBGene00001599	597.759	-0.613319	0.137387	-4.46418	8.04e-06	6.1e-05
WBGene00001600	545.361	-0.412494	0.171039	-2.41169	0.0158787	0.0390805
WBGene00001601	2864.48	-0.888784	0.154611	-5.74852	9e-09	1.62e-07
WBGene00001602	51.8828	-0.383318	0.221957	-1.72699	0.08417	0.1497
WBGene00001603	2.94353	2.04208	0.80454	2.53819	0.0111427	0.0291992
WBGene00001604	6.48144	1.14231	0.664914	1.71798	0.0857999	0.152116
WBGene00001605	1.15629	1.82076	1.15329	1.57875	0.114392	0.191038
WBGene00001606	223.739	-0.0790475	0.113792	-0.694664	0.487266	0.590067
WBGene00001607	392.738	0.0535103	0.159563	0.335355	0.737357	0.80439
WBGene00001608	0.756264	0.771291	1.22766	0.62826	0.529834	0.628907
WBGene00001609	638.629	-0.285115	0.0844377	-3.37663	0.000733807	0.00293437
WBGene00001612	0.634289	1.4101	1.46317	0.963729	0.335182	0.443499
WBGene00001613	54.4933	1.34967	0.256368	5.26457	1.41e-07	1.86e-06
WBGene00001614	0.494073	0.698896	1.5861	0.440639	0.659474	NA
WBGene00001615	1.97629	-0.122729	0.756006	-0.162339	0.871039	0.907244
WBGene00001616	4.1057	2.60434	0.645215	4.0364	5.43e-05	0.000322511
WBGene00001617	16.2378	1.47986	0.337608	4.38337	1.17e-05	8.42e-05
WBGene00001618	2.10726	-0.126012	0.853549	-0.147633	0.882632	0.916251
WBGene00001619	2.80673	1.40132	0.739511	1.89493	0.058102	0.111679
WBGene00001620	3.01901	3.20302	0.992572	3.22699	0.00125098	0.00461288
WBGene00001621	13.1503	0.855352	0.321152	2.66339	0.00773584	0.0214901
WBGene00001622	2.26486	1.37377	0.886191	1.5502	0.121094	0.19993
WBGene00001623	13.4395	0.782797	0.37263	2.10074	0.0356642	0.0754971
WBGene00001624	10.7186	1.16024	0.379834	3.05459	0.00225368	0.00758554
WBGene00001625	12.3777	0.561165	0.441268	1.27171	0.203476	0.30168
WBGene00001626	0.227638	0.947927	2.34918	0.403514	0.68657	NA
WBGene00001627	23.9155	1.71991	0.402457	4.27353	1.92e-05	0.000131414
WBGene00001628	286.777	0.667967	0.0900955	7.41399	1.23e-13	6.72e-12
WBGene00001629	284.405	0.0113418	0.12876	0.088085	0.929809	0.951216
WBGene00001630	101.717	-0.352078	0.138088	-2.54966	0.0107829	0.0283702
WBGene00001631	21.2089	-0.522928	0.293284	-1.78301	0.0745843	0.136212
WBGene00001632	278.837	-0.534382	0.103521	-5.16207	2.44e-07	3.01e-06
WBGene00001633	2.84426	1.30174	0.724106	1.79772	0.0722208	0.132724
WBGene00001635	405.052	-0.227998	0.104962	-2.1722	0.0298409	0.06554
WBGene00001636	21.2627	1.16706	0.305911	3.81505	0.000136158	0.000707545
WBGene00001637	49.4877	0.799822	0.203909	3.92245	8.77e-05	0.000483709
WBGene00001638	535.92	0.621207	0.135079	4.59885	4.25e-06	3.56e-05
WBGene00001639	143.277	0.357155	0.155284	2.3	0.0214481	0.0499996
WBGene00001640	1.14195	1.87328	1.18006	1.58745	0.112411	0.188322
WBGene00001641	0.289199	1.31496	1.92797	0.682043	0.495212	NA
WBGene00001642	0.274377	1.71436	2.62754	0.652456	0.514107	NA
WBGene00001643	3.55942	2.68253	0.818353	3.27796	0.0010456	0.00395552
WBGene00001644	3.09266	2.33731	0.727456	3.21299	0.00131363	0.00480438
WBGene00001645	153.624	-0.0480916	0.104957	-0.458205	0.646805	0.731168
WBGene00001646	2.45839	-0.150557	0.751414	-0.200365	0.841195	0.884534
WBGene00001647	141.302	-0.575747	0.173388	-3.32056	0.000898358	0.00349498
WBGene00001648	224.902	-0.144284	0.121273	-1.18975	0.234146	0.3358
WBGene00001649	15.281	-0.0844818	0.320815	-0.263335	0.792293	0.847843
WBGene00001650	415.305	0.474351	0.405794	1.16894	0.242426	0.344887
WBGene00001651	159.832	-0.222559	0.187472	-1.18716	0.235164	0.336812
WBGene00001653	426.177	-0.407043	0.137811	-2.95364	0.00314053	0.0100329
WBGene00001660	670.798	-0.821376	0.12912	-6.36131	2e-10	5.51e-09
WBGene00001661	143.06	-0.533089	0.166614	-3.19954	0.00137646	0.00499644
WBGene00001662	258.936	-0.451115	0.118912	-3.7937	0.000148419	0.000759971
WBGene00001663	154.286	-0.0667317	0.152757	-0.436849	0.662221	0.744002
WBGene00001664	1.16934	3.32157	1.15936	2.865	0.00417008	0.0126837
WBGene00001665	0.205301	-0.451778	2.97821	-0.151695	0.879428	NA
WBGene00001666	627.949	0.594996	0.129934	4.5792	4.67e-06	3.87e-05
WBGene00001667	1.25055	0.182801	1.08088	0.169122	0.8657	0.902962
WBGene00001668	0.148325	1.43582	3.1122	0.461351	0.644546	NA
WBGene00001669	2.7674	1.85116	0.702493	2.63513	0.00841053	0.0230636
WBGene00001670	1.055	2.44619	1.21745	2.00927	0.0445085	0.0904016
WBGene00001671	1851.43	0.637359	0.117704	5.41495	6.13e-08	9.07e-07
WBGene00001672	0.612973	2.32407	1.92183	1.2093	0.226547	0.326955
WBGene00001673	1.12264	0.695773	1.05732	0.658051	0.510505	0.611193
WBGene00001674	0.764498	0.258361	1.30004	0.198733	0.842472	0.885464
WBGene00001675	0.488845	2.56239	1.54456	1.65898	0.0971198	NA
WBGene00001676	1.31651	2.04041	1.02923	1.98246	0.0474282	0.0950116
WBGene00001677	8.50092	1.23852	0.414307	2.98938	0.00279542	0.00908134
WBGene00001678	231.492	-0.021666	0.10337	-0.209596	0.833983	0.879256
WBGene00001679	311.461	-0.161974	0.108053	-1.49902	0.133867	0.21653
WBGene00001680	488.58	-0.489858	0.158406	-3.09242	0.00198534	0.0068218
WBGene00001681	0.801611	1.26773	1.40052	0.905189	0.365365	0.473003
WBGene00001682	41.8292	-0.258139	0.224537	-1.14965	0.250288	0.353091
WBGene00001683	796.306	-0.393914	0.145399	-2.70919	0.00674471	0.0191162
WBGene00001684	39.8456	-0.23339	0.210252	-1.11005	0.266979	0.371201
WBGene00001685	16.0909	-0.00993796	0.273141	-0.036384	0.970976	0.979688
WBGene00001686	778.662	-0.475778	0.133617	-3.56077	0.000369775	0.00164579
WBGene00001687	2.5946	0.270664	0.701434	0.385872	0.699591	0.773962
WBGene00001688	1180.8	-0.839561	0.173255	-4.84581	1.26e-06	1.25e-05
WBGene00001689	2642.25	-0.864634	0.185021	-4.67317	2.97e-06	2.62e-05
WBGene00001690	0.796405	0.713507	1.36827	0.521468	0.602041	0.692794
WBGene00001691	1.06409	1.41893	1.19916	1.18327	0.236703	0.338572
WBGene00001692	0.34052	1.894	2.12435	0.891566	0.372626	NA
WBGene00001693	0.258966	-0.10035	2.26567	-0.0442915	0.964672	NA
WBGene00001694	0.121591	0.901628	3.11654	0.289304	0.772349	NA
WBGene00001695	1.02969	2.33368	1.19183	1.95807	0.0502219	0.0992585
WBGene00001696	6.11655	2.35297	0.627133	3.75195	0.000175464	0.000871806
WBGene00001697	1.45414	2.20882	1.09794	2.01178	0.0442427	0.0899917
WBGene00001698	2.04291	0.882189	0.919674	0.959241	0.337437	0.445671
WBGene00001699	0.457497	2.04422	1.68652	1.21209	0.225478	NA
WBGene00001700	43.6184	1.25333	0.246993	5.07435	3.89e-07	4.47e-06
WBGene00001701	0.210908	0.420739	2.84064	0.148114	0.882253	NA
WBGene00001702	2.00704	1.41771	0.863915	1.64102	0.100793	0.172819
WBGene00001703	1.04967	1.82367	1.27837	1.42656	0.153707	0.242199
WBGene00001704	25.8821	0.992042	0.262729	3.77591	0.000159424	0.00080653
WBGene00001705	0.694893	1.8121	1.30742	1.38601	0.165743	0.257075
WBGene00001706	0.646869	2.92635	1.61725	1.80946	0.0703795	0.129986
WBGene00001707	11.1196	0.324162	0.353411	0.917237	0.359018	0.466812
WBGene00001708	30.0392	-0.199444	0.221366	-0.900971	0.367604	0.475341
WBGene00001709	27.7498	0.942506	0.22264	4.23332	2.3e-05	0.000154005
WBGene00001710	3.24591	1.44982	0.699838	2.07165	0.0382981	0.0799754
WBGene00001711	1.40795	0.551709	1.06036	0.520301	0.602854	0.693404
WBGene00001712	3.13471	0.983071	0.654245	1.5026	0.132941	0.21537
WBGene00001713	7.71729	1.70692	0.435343	3.92085	8.82e-05	0.000486376
WBGene00001714	0.250947	0.445228	2.32693	0.191337	0.848261	NA
WBGene00001715	2.15231	-0.560083	0.832405	-0.672849	0.501044	0.60284
WBGene00001716	1.65857	0.978889	0.970266	1.00889	0.313029	0.419886
WBGene00001717	2.50976	0.0952547	0.792601	0.12018	0.904341	0.932071
WBGene00001718	0.7465	0.93007	1.26752	0.733769	0.463089	0.567736
WBGene00001719	5.97061	0.204599	0.478067	0.42797	0.668673	0.749446
WBGene00001720	0.126988	1.34817	3.11317	0.433053	0.664976	NA
WBGene00001721	0.306389	0.44076	1.92866	0.228531	0.819233	NA
WBGene00001722	0.2389	-0.48102	2.01153	-0.239131	0.811004	NA
WBGene00001723	6.81703	0.586979	0.465919	1.25983	0.20773	0.306274
WBGene00001724	2.2708	0.848737	0.694018	1.22293	0.221355	0.321357
WBGene00001725	6.57834	0.736234	0.450919	1.63274	0.102523	0.175233
WBGene00001726	4.48881	0.535362	0.588992	0.908947	0.363378	0.471199
WBGene00001727	6.49894	1.90119	0.517418	3.67437	0.000238434	0.00113299
WBGene00001728	0.883429	1.64686	1.17864	1.39725	0.162338	0.253048
WBGene00001729	0.179215	-1.04453	3.02699	-0.345073	0.73004	NA
WBGene00001730	0.27007	2.00737	2.68777	0.746852	0.455153	NA
WBGene00001731	0.370787	-0.910439	1.84996	-0.49214	0.62262	NA
WBGene00001732	0.777659	-2.0777	1.50607	-1.37955	0.167725	0.259514
WBGene00001733	0.512376	2.00944	1.66886	1.20408	0.228558	NA
WBGene00001734	3.541	1.84125	0.740709	2.4858	0.012926	0.0329902
WBGene00001735	23.7133	2.00498	0.27687	7.24159	4.43e-13	2.19e-11
WBGene00001736	197.765	0.538922	0.14921	3.61184	0.000304032	0.00139039
WBGene00001737	0.298242	0.871322	2.17855	0.399954	0.68919	NA
WBGene00001738	1.02577	0.0956431	1.02361	0.0934366	0.925557	0.947905
WBGene00001739	1.13115	0.665207	1.00403	0.662534	0.507629	0.608782
WBGene00001740	66.7212	-0.0340132	0.169765	-0.200355	0.841203	0.884534
WBGene00001743	194.815	0.131455	0.10802	1.21694	0.223626	0.32379
WBGene00001744	582.43	-0.818929	0.121067	-6.76424	1.34e-11	4.82e-10
WBGene00001745	5751.85	-0.292842	0.126551	-2.31402	0.0206668	0.0485386
WBGene00001746	212.228	-0.421228	0.107258	-3.92726	8.59e-05	0.000475484
WBGene00001747	235.693	-0.211366	0.126326	-1.67318	0.0942926	0.163806
WBGene00001748	741.842	-0.773182	0.152077	-5.08415	3.69e-07	4.27e-06
WBGene00001749	61.8344	0.325236	0.171791	1.89321	0.0583299	0.112007
WBGene00001750	0.191378	-0.52091	2.94163	-0.177082	0.859444	NA
WBGene00001751	0.0715406	0.901628	3.11654	0.289304	0.772349	NA
WBGene00001752	6.34165	4.0922	0.749766	5.45797	4.82e-08	7.28e-07
WBGene00001753	55.3946	-0.575626	0.179328	-3.20991	0.00132778	0.00484527
WBGene00001754	1.05517	2.11663	1.15413	1.83396	0.06666	0.124585
WBGene00001755	31.0738	-0.396987	0.203435	-1.95142	0.0510076	0.100507
WBGene00001756	5.20564	2.20789	0.630578	3.50137	0.000462866	0.00198998
WBGene00001757	0.455837	0.868033	1.62478	0.534248	0.59317	NA
WBGene00001758	8.81669	2.27036	0.43806	5.18276	2.19e-07	2.73e-06
WBGene00001759	2.37225	2.46499	1.05919	2.32725	0.0199522	0.0471962
WBGene00001760	27.6101	0.701925	0.235624	2.97901	0.00289182	0.00934652
WBGene00001761	3.60474	2.47733	0.663633	3.73298	0.000189228	0.000929343
WBGene00001762	5.80774	1.61931	0.55743	2.90496	0.00367296	0.0114156
WBGene00001763	296.553	-0.382629	0.277309	-1.37979	0.16765	0.259438
WBGene00001764	240.33	0.0119011	0.134872	0.0882393	0.929686	0.95119
WBGene00001765	0.404482	0.757882	1.67232	0.453193	0.65041	NA
WBGene00001766	0.156097	0.420736	3.11654	0.135001	0.892611	NA
WBGene00001767	2.47229	1.46312	0.744449	1.96538	0.0493706	0.0980111
WBGene00001768	12.6863	0.363367	0.332169	1.09392	0.273989	0.378795
WBGene00001769	6.54504	0.383528	0.423955	0.904642	0.365655	0.473275
WBGene00001770	7.00088	3.09932	0.602466	5.14439	2.68e-07	3.26e-06
WBGene00001771	0.149853	-0.932238	3.09823	-0.300893	0.763496	NA
WBGene00001772	14.3507	1.43262	0.365619	3.91833	8.92e-05	0.000490254
WBGene00001773	4.81352	1.55747	0.589337	2.64275	0.00822355	0.0226154
WBGene00001774	3.3569	1.64535	0.630372	2.61013	0.0090508	0.0245209
WBGene00001775	5.07264	1.90594	0.600724	3.17275	0.00151005	0.00541263
WBGene00001776	1.14191	-0.384213	1.062	-0.361784	0.717513	0.787962
WBGene00001777	1.67179	2.60663	1.05378	2.47359	0.0133763	0.0339449
WBGene00001778	75.3677	1.86221	0.270229	6.89123	5.53e-12	2.15e-10
WBGene00001779	3.44709	0.448399	0.609647	0.735506	0.462032	0.566794
WBGene00001780	27.2342	0.299531	0.224566	1.33382	0.182262	0.277363
WBGene00001781	0.179659	0.869339	2.50944	0.346428	0.729021	NA
WBGene00001782	0.163481	0.901628	3.11654	0.289304	0.772349	NA
WBGene00001783	0.998607	1.16096	1.16976	0.99248	0.320963	0.428564
WBGene00001784	4.19908	0.276273	0.580024	0.476313	0.633852	0.719888
WBGene00001785	25.5959	1.34865	0.357332	3.77422	0.000160512	0.000811293
WBGene00001786	12.3369	1.87069	0.400311	4.67311	2.97e-06	2.62e-05
WBGene00001787	8.57683	-0.818158	0.493687	-1.65724	0.0974709	0.168341
WBGene00001788	0.349539	0.452668	1.90502	0.237619	0.812177	NA
WBGene00001789	0.0406199	-0.0601574	3.11654	-0.0193026	0.9846	NA
WBGene00001790	2.29302	0.999814	0.742515	1.34652	0.178134	0.272329
WBGene00001791	112.999	0.30068	0.144951	2.07435	0.0380467	0.07959
WBGene00001792	15.2687	0.318298	0.287976	1.1053	0.269032	0.373262
WBGene00001793	411.143	-0.344468	0.0920035	-3.74407	0.000181062	0.000895755
WBGene00001794	35.6127	0.261753	0.264197	0.99075	0.321808	0.429398
WBGene00001795	16.6664	1.27446	0.328964	3.87415	0.000106997	0.000572828
WBGene00001796	2.85723	1.91698	0.697346	2.74896	0.00597839	0.01727
WBGene00001803	0.275061	1.34112	2.27847	0.588607	0.556125	NA
WBGene00001804	1.13055	0.0526732	1.03307	0.050987	0.959336	0.971381
WBGene00001805	1.16268	0.777075	1.02254	0.759945	0.447287	0.553104
WBGene00001806	0.648134	2.29462	1.54714	1.48314	0.138037	0.221938
WBGene00001808	111.896	-0.566172	0.126549	-4.47393	7.68e-06	5.87e-05
WBGene00001811	32.056	0.697215	0.253907	2.74595	0.00603357	0.0174001
WBGene00001812	229.46	-0.0293886	0.0959915	-0.306159	0.759484	0.822302
WBGene00001813	245.677	-0.172523	0.109522	-1.57524	0.115202	0.192144
WBGene00001814	2206.85	-0.072019	0.096811	-0.743914	0.456928	0.562189
WBGene00001815	89.0949	0.112877	0.142196	0.793809	0.427307	0.534263
WBGene00001816	118.011	-0.310353	0.138961	-2.23338	0.0255238	0.0576692
WBGene00001817	47.6242	2.59459	0.27114	9.56919	1.08e-21	1.79e-19
WBGene00001818	3.4533	1.14586	0.655208	1.74886	0.080316	0.144101
WBGene00001819	111.66	1.01444	0.179953	5.63727	1.73e-08	2.89e-07
WBGene00001820	58.9762	-0.0641582	0.248898	-0.25777	0.796585	0.850914
WBGene00001821	0.399225	1.72807	2.05236	0.841992	0.399793	NA
WBGene00001823	50.6726	0.0130213	0.160906	0.080925	0.935502	0.954973
WBGene00001824	35.1315	0.808621	0.300154	2.69402	0.00705963	0.0198651
WBGene00001827	393.657	-0.261774	0.102734	-2.54808	0.0108316	0.0284793
WBGene00001828	3.63234	1.73457	0.654803	2.649	0.00807292	0.022253
WBGene00001829	3317.06	-0.932162	0.214493	-4.34587	1.39e-05	9.79e-05
WBGene00001830	1246.91	-0.387078	0.175563	-2.20478	0.0274697	0.0611699
WBGene00001831	3324.56	-0.95625	0.16644	-5.7453	9.18e-09	1.65e-07
WBGene00001832	2189.63	-0.902128	0.191116	-4.72033	2.35e-06	2.15e-05
WBGene00001833	1550.26	-0.279605	0.135752	-2.05968	0.0394294	0.0818918
WBGene00001834	423.55	-0.796657	0.126366	-6.30434	2.89e-10	7.7e-09
WBGene00001835	234.103	-0.238741	0.13223	-1.80549	0.0709981	0.130858
WBGene00001836	777.853	0.0628614	0.0906881	0.693161	0.488209	0.590843
WBGene00001837	113.634	0.128929	0.163787	0.787174	0.43118	0.53787
WBGene00001838	124.5	0.196335	0.118583	1.65568	0.0977864	0.168741
WBGene00001839	3.63511	1.75249	0.738024	2.37458	0.0175691	0.0424582
WBGene00001840	878.448	-0.723827	0.14481	-4.99845	5.78e-07	6.34e-06
WBGene00001841	0.171542	0.420737	3.03168	0.13878	0.889624	NA
WBGene00001842	10.097	0.0791498	0.358206	0.220962	0.825122	0.872967
WBGene00001843	17.1143	1.69893	0.345504	4.91726	8.78e-07	9.16e-06
WBGene00001844	63.3895	-0.226506	0.178078	-1.27195	0.203391	0.301601
WBGene00001851	45.3871	-0.14717	0.259511	-0.567107	0.570642	0.66585
WBGene00001852	21.1254	2.50235	0.368557	6.78958	1.12e-11	4.1e-10
WBGene00001853	241.862	0.346012	0.111374	3.10676	0.0018915	0.00655336
WBGene00001854	3624.99	-0.140707	0.0854168	-1.6473	0.0994969	0.171135
WBGene00001855	988.119	-0.606256	0.169641	-3.57376	0.00035189	0.00157867
WBGene00001856	417.408	1.03564	0.110196	9.39817	5.55e-21	8.37e-19
WBGene00001857	66.9762	-0.451215	0.186356	-2.42125	0.0154672	0.0382551
WBGene00001858	1.53218	0.332206	1.00303	0.331204	0.740491	0.806999
WBGene00001859	8675.93	-0.114325	0.104248	-1.09667	0.272787	0.377502
WBGene00001860	714.823	-0.721624	0.149492	-4.82717	1.38e-06	1.36e-05
WBGene00001862	467.973	-0.957508	0.186015	-5.14749	2.64e-07	3.22e-06
WBGene00001863	7.65433	2.23063	0.599293	3.7221	0.000197572	0.000964796
WBGene00001864	166.056	-0.423471	0.133878	-3.16312	0.00156089	0.00557348
WBGene00001865	988.939	-0.297345	0.156731	-1.89717	0.0578061	0.111241
WBGene00001867	202.645	-0.146932	0.0957574	-1.53442	0.124926	0.204772
WBGene00001869	267.636	-0.269087	0.19386	-1.38805	0.165123	0.256337
WBGene00001872	266.062	-0.231863	0.124311	-1.86519	0.062155	0.117805
WBGene00001874	468.213	-0.424783	0.125459	-3.38582	0.000709657	0.00285143
WBGene00001875	28.6857	0.30614	0.277963	1.10137	0.270737	0.375122
WBGene00001876	75.3998	0.038231	0.167852	0.227766	0.819828	0.869102
WBGene00001877	20.6686	0.560941	0.236194	2.37492	0.0175527	0.0424383
WBGene00001878	143.813	0.558427	0.145394	3.84078	0.000122646	0.000644164
WBGene00001879	20.915	0.299656	0.319796	0.937021	0.348748	0.456944
WBGene00001880	39.7313	0.279718	0.177713	1.57399	0.11549	0.192542
WBGene00001881	5.81	0.343406	0.471919	0.727681	0.466809	0.571109
WBGene00001882	119.581	0.413855	0.124197	3.33226	0.00086144	0.00336875
WBGene00001883	5.03848	0.544719	0.496475	1.09717	0.272566	0.377257
WBGene00001884	119.4	1.01891	0.123409	8.2564	1.5e-16	1.4e-14
WBGene00001885	6.89539	1.20999	0.439739	2.75162	0.0059302	0.0171525
WBGene00001886	66.9144	0.695965	0.176752	3.93753	8.23e-05	0.000458044
WBGene00001887	4.85983	0.580142	0.494975	1.17206	0.241171	0.343489
WBGene00001888	111.728	1.02595	0.151618	6.76667	1.32e-11	4.75e-10
WBGene00001889	6.27139	0.452353	0.449711	1.00588	0.314476	0.421423
WBGene00001890	67.7242	0.730666	0.174734	4.18159	2.89e-05	0.000188024
WBGene00001891	89.9707	0.173893	0.161211	1.07867	0.280734	0.385837
WBGene00001892	33.6837	0.383496	0.218144	1.758	0.078748	0.141951
WBGene00001893	2.44217	0.564053	0.676894	0.833296	0.404678	0.512014
WBGene00001894	115.528	0.53256	0.140145	3.80007	0.000144657	0.000744408
WBGene00001895	52.9408	0.533594	0.167373	3.18806	0.00143229	0.00516795
WBGene00001896	8.01265	0.44717	0.401054	1.11499	0.264856	0.369115
WBGene00001898	13186.8	0.014003	0.0689936	0.202961	0.839166	0.882773
WBGene00001899	169.42	0.952974	0.159509	5.97442	2.31e-09	4.85e-08
WBGene00001900	14.5783	1.16093	0.31283	3.71106	0.000206394	0.00100087
WBGene00001901	3.56962	-0.141537	0.592822	-0.238751	0.811299	0.862393
WBGene00001902	220.094	0.062017	0.156733	0.395686	0.692337	0.76837
WBGene00001903	58.1228	0.36796	0.185052	1.98841	0.0467659	0.0940116
WBGene00001904	2.81797	0.272674	0.638288	0.427196	0.669237	0.749788
WBGene00001905	349.474	-0.273042	0.0896302	-3.04632	0.00231663	0.0077601
WBGene00001906	10.1536	0.409327	0.377052	1.0856	0.277657	0.382519
WBGene00001907	39.1977	0.263839	0.193339	1.36465	0.172364	0.265392
WBGene00001908	3.76792	0.379359	0.615724	0.616118	0.537817	0.636339
WBGene00001909	766.904	-0.452382	0.0744502	-6.0763	1.23e-09	2.79e-08
WBGene00001910	131.894	0.481465	0.181983	2.64565	0.00815339	0.0224559
WBGene00001911	519.88	-0.476715	0.091821	-5.19179	2.08e-07	2.62e-06
WBGene00001912	216.654	-0.0604029	0.15648	-0.38601	0.699489	0.773893
WBGene00001913	3.40173	1.19102	0.653007	1.8239	0.0681668	0.126736
WBGene00001914	13.0212	0.568426	0.321195	1.76972	0.0767734	0.139237
WBGene00001915	66.8901	0.643385	0.158613	4.05631	4.99e-05	0.000300144
WBGene00001916	72.492	0.800101	0.172363	4.64195	3.45e-06	2.98e-05
WBGene00001917	7.60418	1.02618	0.432137	2.37466	0.0175654	0.0424582
WBGene00001918	125.372	0.623893	0.110622	5.63985	1.7e-08	2.86e-07
WBGene00001919	33.6412	0.813661	0.272978	2.98069	0.00287603	0.00930318
WBGene00001920	375.947	0.290921	0.102905	2.8271	0.0046972	0.01404
WBGene00001921	139.304	0.136731	0.11605	1.17821	0.238713	0.340751
WBGene00001922	48.5852	0.983736	0.195286	5.03742	4.72e-07	5.3e-06
WBGene00001923	4.0837	-0.138824	0.582565	-0.238299	0.81165	0.862625
WBGene00001924	218.152	0.0510729	0.150209	0.340013	0.733847	0.801497
WBGene00001925	55.2091	0.244693	0.166984	1.46536	0.142822	0.228244
WBGene00001926	8.45197	0.409193	0.359637	1.13779	0.255206	0.358618
WBGene00001927	3.91815	0.614965	0.689702	0.891639	0.372586	0.480279
WBGene00001928	124.104	0.393563	0.145493	2.70502	0.00682999	0.0193243
WBGene00001929	139.74	0.639836	0.130669	4.89663	9.75e-07	1e-05
WBGene00001930	20.2032	0.687825	0.293571	2.34296	0.0191316	0.0455975
WBGene00001931	5.8599	0.488255	0.437149	1.11691	0.264034	0.368204
WBGene00001932	223.484	0.806792	0.0976508	8.26201	1.43e-16	1.34e-14
WBGene00001933	47.7626	0.441373	0.189548	2.32855	0.0198828	0.0470617
WBGene00001934	397.062	0.0554952	0.0879847	0.630737	0.528212	0.627515
WBGene00001935	108.032	0.266597	0.128339	2.07729	0.0377745	0.0791858
WBGene00001936	67.9517	0.691958	0.15316	4.51787	6.25e-06	4.94e-05
WBGene00001937	125.103	0.663931	0.124939	5.31405	1.07e-07	1.48e-06
WBGene00001938	45.0528	0.334343	0.217272	1.53882	0.123848	0.203531
WBGene00001939	5.67583	0.45653	0.494682	0.922875	0.356073	0.463874
WBGene00001940	218.043	0.834072	0.11245	7.41728	1.2e-13	6.58e-12
WBGene00001941	277.172	-0.0172616	0.161322	-0.107001	0.914788	0.939666
WBGene00001942	69.3046	-0.1581	0.176776	-0.894349	0.371135	0.478738
WBGene00001943	3.69668	0.745942	0.561371	1.32879	0.183918	0.279406
WBGene00001944	7.79244	1.50215	0.475628	3.15825	0.0015872	0.00564887
WBGene00001945	25.6845	0.0827933	0.267868	0.309083	0.757259	0.820618
WBGene00001946	230.743	-0.416549	0.185414	-2.24659	0.0246662	0.0561067
WBGene00001947	67.5859	0.265039	0.160909	1.64714	0.0995287	0.171175
WBGene00001948	3.12125	1.11863	0.610557	1.83215	0.0669286	0.124979
WBGene00001949	29.8195	-0.822777	0.256811	-3.20383	0.00135613	0.00493129
WBGene00001950	19.2555	-1.42051	0.368978	-3.84986	0.000118185	0.000624079
WBGene00001951	5.05456	2.1847	0.550518	3.96844	7.23e-05	0.000410684
WBGene00001952	18.7819	1.25118	0.344011	3.63704	0.000275787	0.00128217
WBGene00001953	28.7431	0.21003	0.297987	0.704829	0.480917	0.584292
WBGene00001954	0.158626	-0.672235	3.10601	-0.216431	0.828652	NA
WBGene00001955	1803.47	-0.72346	0.116446	-6.21284	5.2e-10	1.3e-08
WBGene00001956	0.403747	2.0215	2.43767	0.829277	0.406948	NA
WBGene00001957	0	NA	NA	NA	NA	NA
WBGene00001958	6.36123	0.624587	0.468423	1.33338	0.182406	0.277507
WBGene00001959	0.402271	-0.0214574	1.65973	-0.0129283	0.989685	NA
WBGene00001960	1.92611	1.40914	0.875999	1.60861	0.107702	0.182115
WBGene00001961	7.31042	0.846139	0.418466	2.022	0.0431759	0.0882708
WBGene00001962	0.143081	1.43536	3.11221	0.461201	0.644654	NA
WBGene00001963	50.591	-0.465543	0.189337	-2.45881	0.0139398	0.0350975
WBGene00001964	0.649002	1.8967	1.57011	1.208	0.227046	0.327557
WBGene00001965	0.0999021	-0.583801	3.10894	-0.187781	0.851048	NA
WBGene00001966	3.39434	0.57609	0.600397	0.959515	0.337299	0.445579
WBGene00001967	0.163481	0.901628	3.11654	0.289304	0.772349	NA
WBGene00001968	0.297058	0.497104	1.94542	0.255525	0.798317	NA
WBGene00001971	167.444	-0.0662664	0.123926	-0.534724	0.592841	0.685023
WBGene00001972	288.165	-0.48021	0.139238	-3.44885	0.000562989	0.00235734
WBGene00001973	497.526	-0.857894	0.168694	-5.08551	3.67e-07	4.25e-06
WBGene00001974	591.467	-0.681072	0.119984	-5.67634	1.38e-08	2.37e-07
WBGene00001975	59.7501	0.48073	0.15916	3.02042	0.0025242	0.00833443
WBGene00001976	12189.7	-0.205475	0.0907811	-2.26341	0.0236104	0.0540565
WBGene00001977	2416.89	-0.746793	0.18965	-3.93774	8.23e-05	0.000457765
WBGene00001978	492.367	-0.536924	0.114119	-4.70497	2.54e-06	2.3e-05
WBGene00001979	613.144	-0.746133	0.135879	-5.49116	3.99e-08	6.18e-07
WBGene00001980	623.747	0.026732	0.0689486	0.387709	0.698231	0.772893
WBGene00001981	105.702	1.01528	0.318059	3.19212	0.00141232	0.00510908
WBGene00001983	195.75	-0.175078	0.107247	-1.63247	0.10258	0.175314
WBGene00001984	0.303584	-0.533175	1.92633	-0.276783	0.781947	NA
WBGene00001985	57.2262	0.113739	0.167515	0.678978	0.497152	0.599187
WBGene00001986	0.515143	0.382479	1.82542	0.209529	0.834035	NA
WBGene00001987	7.30046	1.81923	0.479504	3.79399	0.000148248	0.000759299
WBGene00001988	3.71419	-0.44516	0.57836	-0.769694	0.441481	0.54741
WBGene00001989	47.9588	0.121442	0.254836	0.476548	0.633684	0.719823
WBGene00001990	4.815	1.04698	0.556713	1.88065	0.0600191	0.114533
WBGene00001991	3.85157	-0.102921	0.638114	-0.161289	0.871866	0.90796
WBGene00001992	5.54945	1.62925	0.647033	2.51803	0.0118014	0.0306021
WBGene00001993	4.96505	1.75052	0.579306	3.02175	0.00251319	0.00830076
WBGene00001994	62.4204	0.161379	0.169805	0.950376	0.341921	0.450107
WBGene00001995	220.174	-0.331157	0.146432	-2.26151	0.0237277	0.054287
WBGene00001996	454.127	-0.147016	0.087186	-1.68624	0.0917505	0.160173
WBGene00001997	338.773	-0.624203	0.194208	-3.21409	0.0013086	0.00478955
WBGene00001998	289.128	-0.272481	0.122683	-2.22102	0.0263496	0.0591463
WBGene00001999	699.305	-0.868639	0.148703	-5.84145	5.17e-09	9.91e-08
WBGene00002000	389.828	-0.354978	0.146323	-2.42599	0.0152666	0.0378785
WBGene00002001	290.078	-0.357525	0.141694	-2.52322	0.0116286	0.030246
WBGene00002002	78.6325	0.129257	0.190451	0.67869	0.497334	0.599348
WBGene00002003	381.193	-0.0869209	0.102224	-0.850301	0.395158	0.502108
WBGene00002004	882.554	-0.190238	0.0712353	-2.67055	0.00757265	0.0211056
WBGene00002005	1001.59	-1.13624	0.136538	-8.32178	8.67e-17	8.41e-15
WBGene00002006	916.219	0.106884	0.1096	0.97522	0.329451	0.43755
WBGene00002007	183.688	-0.245872	0.11975	-2.05321	0.0400523	0.0829666
WBGene00002008	569.384	-0.000246512	0.14095	-0.00174893	0.998605	0.999165
WBGene00002010	416.268	-0.477261	0.0816955	-5.84195	5.16e-09	9.89e-08
WBGene00002011	1.71307	1.32911	0.898312	1.47956	0.13899	0.223141
WBGene00002012	2.59434	0.882634	0.702139	1.25707	0.20873	0.307315
WBGene00002013	9.71903	0.031421	0.382246	0.0822012	0.934487	0.954298
WBGene00002015	207.645	0.462406	0.405955	1.13906	0.254679	0.358066
WBGene00002016	8.19362	0.85105	0.540431	1.57476	0.115312	0.192294
WBGene00002017	8.0919	1.37685	0.546518	2.51932	0.0117583	0.0305146
WBGene00002018	3.93622	1.46971	0.64665	2.27281	0.0230378	0.0530182
WBGene00002019	8.54298	-0.0592993	0.460355	-0.128812	0.897506	0.926733
WBGene00002020	292.724	-0.0968327	0.399168	-0.242586	0.808326	0.859932
WBGene00002021	3.7105	1.35439	0.602348	2.24852	0.024543	0.0558847
WBGene00002023	3.95949	2.20107	0.722803	3.04519	0.00232537	0.00778539
WBGene00002024	0.211539	0.420739	2.83799	0.148252	0.882144	NA
WBGene00002025	2137.39	-0.333894	0.15126	-2.20742	0.0272847	0.0608133
WBGene00002026	9.299	1.7686	0.517845	3.41531	0.0006371	0.00260966
WBGene00002027	495.249	-0.524057	0.116029	-4.51659	6.28e-06	4.97e-05
WBGene00002028	140.443	0.190643	0.136376	1.39792	0.162138	0.252827
WBGene00002029	18.0952	0.541678	0.314503	1.72233	0.0850096	0.150969
WBGene00002030	2.65275	-0.0311535	0.661839	-0.0470711	0.962457	0.973299
WBGene00002031	9.51478	-0.24156	0.34787	-0.694397	0.487433	0.590067
WBGene00002032	2175.57	-0.790094	0.151706	-5.20805	1.91e-07	2.43e-06
WBGene00002033	314.233	-0.689353	0.135191	-5.09911	3.41e-07	4.01e-06
WBGene00002034	1106.97	-0.583074	0.125234	-4.65588	3.23e-06	2.81e-05
WBGene00002035	429.54	-0.397746	0.119062	-3.34066	0.000835804	0.00327568
WBGene00002036	5123.57	-0.630792	0.17017	-3.70683	0.00020987	0.00101571
WBGene00002037	49.5218	0.0315766	0.189396	0.166723	0.867588	0.904563
WBGene00002038	11.115	0.71743	0.342672	2.09364	0.0362925	0.0765629
WBGene00002039	25.6247	1.53527	0.28602	5.36768	7.98e-08	1.13e-06
WBGene00002040	50.4968	0.714763	0.2439	2.93056	0.00338349	0.0106699
WBGene00002041	11.6242	1.9563	0.4067	4.81018	1.51e-06	1.46e-05
WBGene00002042	307.806	-0.0251204	0.122631	-0.204845	0.837693	0.881799
WBGene00002043	108.088	0.0204248	0.139455	0.146462	0.883557	0.91687
WBGene00002044	20.1024	0.44677	0.251205	1.77851	0.0753199	0.137217
WBGene00002045	180.823	-0.501508	0.145656	-3.4431	0.000575091	0.00239725
WBGene00002046	194.079	-0.142726	0.099553	-1.43367	0.151667	0.23974
WBGene00002047	3502.14	-0.778512	0.173488	-4.4874	7.21e-06	5.55e-05
WBGene00002048	58.7685	0.64963	0.297666	2.18241	0.0290792	0.0641345
WBGene00002050	1.08327	1.29413	1.12434	1.15102	0.249725	0.352591
WBGene00002051	1.25609	2.91667	1.10887	2.6303	0.0085309	0.0233349
WBGene00002052	1.09581	0.123869	1.15973	0.106808	0.914941	0.939734
WBGene00002053	1.25072	1.38368	1.02171	1.35428	0.175647	0.269274
WBGene00002054	5.02284	1.33866	0.570046	2.34833	0.0188576	0.045043
WBGene00002055	21.6519	1.46132	0.361243	4.04527	5.23e-05	0.000312239
WBGene00002056	46.3932	1.05869	0.281958	3.75479	0.000173485	0.000863504
WBGene00002057	4.04801	1.35721	0.769834	1.76299	0.0779019	0.140774
WBGene00002058	126.636	1.47873	0.184575	8.01155	1.13e-15	9.45e-14
WBGene00002059	225.274	-0.42157	0.151533	-2.78203	0.00540197	0.0158585
WBGene00002060	12.4062	-0.537795	0.352718	-1.52472	0.12733	0.207945
WBGene00002061	296.938	-0.346839	0.134721	-2.5745	0.0100386	0.0267279
WBGene00002062	14.6994	-1.13796	0.39645	-2.87038	0.00409981	0.0125121
WBGene00002063	913.536	-0.0518629	0.0672563	-0.771124	0.440633	0.546511
WBGene00002064	396.411	-0.625905	0.0769687	-8.13194	4.22e-16	3.71e-14
WBGene00002065	2410.8	-0.156775	0.117579	-1.33336	0.182413	0.277507
WBGene00002066	750.642	-0.753592	0.141515	-5.32519	1.01e-07	1.39e-06
WBGene00002067	12.8766	1.56111	0.372988	4.18542	2.85e-05	0.000185061
WBGene00002068	135.569	-0.584757	0.148964	-3.92549	8.66e-05	0.000478588
WBGene00002069	52.8538	0.743661	0.266158	2.79406	0.00520503	0.0153634
WBGene00002070	96.677	0.0863241	0.145458	0.593464	0.55287	0.650381
WBGene00002071	63.1603	0.350251	0.162266	2.1585	0.0308886	0.0673662
WBGene00002072	320.39	-0.645757	0.145387	-4.44165	8.93e-06	6.69e-05
WBGene00002073	414.821	-0.357772	0.153215	-2.33509	0.0195385	0.0463981
WBGene00002074	664.699	-0.272401	0.127038	-2.14426	0.0320122	0.0693698
WBGene00002075	417.409	-0.147199	0.108917	-1.35148	0.176542	0.270381
WBGene00002076	793.295	-0.533633	0.0752576	-7.09076	1.33e-12	5.78e-11
WBGene00002077	882.471	-0.686455	0.0797692	-8.60551	7.6e-18	8.36e-16
WBGene00002078	832.675	-0.38977	0.0866108	-4.50024	6.79e-06	5.31e-05
WBGene00002079	611.867	-0.49034	0.10847	-4.52052	6.17e-06	4.89e-05
WBGene00002080	595.332	0.0410668	0.0805898	0.509578	0.610347	0.699395
WBGene00002081	198.455	0.417914	0.114043	3.66454	0.000247782	0.00117198
WBGene00002083	501.525	-0.456855	0.153501	-2.97625	0.002918	0.00941875
WBGene00002084	0.684291	2.36188	1.38109	1.71016	0.0872362	0.154077
WBGene00002085	0.136688	0.0342445	3.11319	0.0109998	0.991224	NA
WBGene00002086	0.0767846	0.901628	3.11654	0.289304	0.772349	NA
WBGene00002087	0.455283	1.26457	1.6206	0.780314	0.435206	NA
WBGene00002088	1611.46	0.556822	0.144799	3.84549	0.000120314	0.000633643
WBGene00002089	0.0499511	-0.0601574	3.11654	-0.0193026	0.9846	NA
WBGene00002090	0.782073	2.61567	1.54439	1.69365	0.0903311	0.158203
WBGene00002091	0	NA	NA	NA	NA	NA
WBGene00002092	0.0474271	-0.0601574	3.11654	-0.0193026	0.9846	NA
WBGene00002093	1.6665	0.990564	0.913267	1.08464	0.278082	0.382998
WBGene00002094	4.02805	5.60756	1.0384	5.40022	6.66e-08	9.77e-07
WBGene00002095	0	NA	NA	NA	NA	NA
WBGene00002096	0.102875	0.420736	3.11654	0.135001	0.892611	NA
WBGene00002097	0.235022	1.43352	2.7585	0.519673	0.603292	NA
WBGene00002098	0.679528	1.1431	1.50417	0.759954	0.447282	0.553104
WBGene00002099	0.620824	2.33579	1.52073	1.53596	0.124547	0.204418
WBGene00002100	1931.37	-0.249543	0.124528	-2.00391	0.0450796	0.0913149
WBGene00002101	0.121591	0.901628	3.11654	0.289304	0.772349	NA
WBGene00002102	0	NA	NA	NA	NA	NA
WBGene00002103	0.219835	-1.28851	2.36232	-0.545441	0.58545	NA
WBGene00002104	0.0715406	0.901628	3.11654	0.289304	0.772349	NA
WBGene00002105	0.0406199	-0.0601574	3.11654	-0.0193026	0.9846	NA
WBGene00002106	0.126736	0.420736	3.11654	0.135001	0.892611	NA
WBGene00002107	0.478933	2.66633	1.68853	1.57908	0.114318	NA
WBGene00002108	0	NA	NA	NA	NA	NA
WBGene00002109	0.0554478	0.901628	3.11654	0.289304	0.772349	NA
WBGene00002110	1.74665	-0.192099	1.05148	-0.182695	0.855037	0.894668
WBGene00002111	0	NA	NA	NA	NA	NA
WBGene00002112	0.275314	2.03566	2.21315	0.919802	0.357676	NA
WBGene00002113	0.525593	0.912389	1.63467	0.558147	0.576744	NA
WBGene00002114	11.2816	0.343633	0.377684	0.909844	0.362905	0.470741
WBGene00002115	0.266356	0.870842	2.24574	0.387775	0.698182	NA
WBGene00002116	2.36894	0.837286	0.703147	1.19077	0.233744	0.335294
WBGene00002117	168.289	0.183398	0.133408	1.37472	0.169219	0.261309
WBGene00002118	1.84348	2.16993	0.984522	2.20404	0.0275213	0.0612582
WBGene00002119	4.16548	0.395569	0.597515	0.662024	0.507956	0.609062
WBGene00002120	1.36114	1.38221	1.09336	1.26418	0.206164	0.304514
WBGene00002121	0.121591	0.901628	3.11654	0.289304	0.772349	NA
WBGene00002123	15.1001	2.34539	1.12956	2.07637	0.0378594	0.0792921
WBGene00002124	18.5878	-0.328838	0.267996	-1.22703	0.219813	0.319449
WBGene00002125	11.5653	-0.774438	0.385819	-2.00726	0.0447223	0.0907788
WBGene00002127	0.788243	0.980703	1.18897	0.824835	0.409465	0.516537
WBGene00002128	1.37547	0.866768	0.993638	0.872318	0.383035	0.490489
WBGene00002129	25.6954	0.329468	0.241951	1.36172	0.173288	0.266521
WBGene00002130	1.61731	1.37204	1.06068	1.29355	0.195822	0.292457
WBGene00002131	0.415014	-0.319989	1.81937	-0.175879	0.860389	NA
WBGene00002132	5.9463	0.284808	0.496092	0.574102	0.565899	0.661878
WBGene00002133	42.0872	0.156389	0.188795	0.828356	0.407469	0.514549
WBGene00002134	17.6014	0.890583	0.320087	2.78231	0.00539729	0.0158482
WBGene00002135	60.0844	-0.0513779	0.161213	-0.318696	0.749957	0.814734
WBGene00002136	200.236	-0.344009	0.115261	-2.98461	0.00283937	0.00920434
WBGene00002137	4.60521	2.57408	0.636947	4.04127	5.32e-05	0.000316835
WBGene00002138	4.37237	1.5567	0.568123	2.74007	0.00614256	0.0176581
WBGene00002139	5.72441	2.32322	0.570979	4.06883	4.72e-05	0.000286391
WBGene00002140	1.53144	1.46008	0.926588	1.57575	0.115082	0.191961
WBGene00002141	9.17344	1.29149	0.514232	2.51149	0.0120224	0.031101
WBGene00002142	48.4993	0.553769	0.234475	2.36174	0.0181895	0.0436816
WBGene00002143	98.0461	0.249199	0.130596	1.90818	0.0563685	0.109051
WBGene00002144	216.362	-0.30532	0.100299	-3.0441	0.00233374	0.0078081
WBGene00002146	3.48391	1.80777	0.698504	2.58805	0.009652	0.0258248
WBGene00002147	419.479	0.424839	0.103772	4.09397	4.24e-05	0.000260904
WBGene00002148	472.017	-0.481724	0.105677	-4.55847	5.15e-06	4.19e-05
WBGene00002149	0.31085	-0.216677	1.72152	-0.125864	0.89984	NA
WBGene00002150	0.698532	1.21197	1.3986	0.866559	0.386184	0.493546
WBGene00002151	256.843	0.234541	0.199224	1.17727	0.239087	0.341209
WBGene00002152	759.125	-0.618353	0.0969442	-6.37844	1.79e-10	5.03e-09
WBGene00002153	255.506	-0.539225	0.143529	-3.75692	0.000172019	0.000857078
WBGene00002162	128.271	-0.172339	0.146786	-1.17409	0.240361	0.342504
WBGene00002163	35.3174	1.2357	0.277301	4.45617	8.34e-06	6.31e-05
WBGene00002169	949.722	-0.579643	0.0654351	-8.85828	8.13e-19	9.95e-17
WBGene00002173	69.5321	1.22049	0.235304	5.18686	2.14e-07	2.68e-06
WBGene00002174	28.0703	1.2271	0.3646	3.36562	0.000763723	0.0030363
WBGene00002175	76.1624	-0.448588	0.20516	-2.18653	0.0287765	0.0635601
WBGene00002176	1326.43	-0.162809	0.0791046	-2.05814	0.0395765	0.0821373
WBGene00002177	0.957356	2.9975	1.39733	2.14516	0.03194	0.0692363
WBGene00002178	1.80296	1.3849	0.83656	1.65546	0.0978302	0.168787
WBGene00002179	4.48642	1.2336	0.534825	2.30655	0.0210799	0.049276
WBGene00002180	36.116	-0.074103	0.207708	-0.356765	0.721268	0.791597
WBGene00002181	153.15	0.872999	0.187323	4.66038	3.16e-06	2.76e-05
WBGene00002182	78.0672	0.585646	0.188801	3.10193	0.00192266	0.00664488
WBGene00002183	436.424	-0.353588	0.0970521	-3.64328	0.000269185	0.00125628
WBGene00002184	2509.61	-0.178952	0.0943976	-1.89572	0.0579965	0.111553
WBGene00002185	405.718	0.00505231	0.0913458	0.0553097	0.955892	0.969497
WBGene00002186	4.18854	2.52839	0.745354	3.3922	0.000693349	0.00279853
WBGene00002187	24.2872	0.204985	0.234673	0.873489	0.382396	0.489863
WBGene00002188	3.42687	1.86624	0.684919	2.72476	0.00643488	0.0183468
WBGene00002189	112.357	0.999121	0.197033	5.07084	3.96e-07	4.54e-06
WBGene00002190	35.3755	2.59702	0.271589	9.56231	1.15e-21	1.9e-19
WBGene00002191	158.662	-0.333621	0.176026	-1.89529	0.0580538	0.11163
WBGene00002192	754.136	-0.303956	0.0661986	-4.59159	4.4e-06	3.67e-05
WBGene00002193	1.62313	1.99702	1.13141	1.76507	0.0775514	0.14031
WBGene00002194	4.87796	4.50034	1.06954	4.20775	2.58e-05	0.000170067
WBGene00002195	1.03406	-0.00463165	1.05833	-0.00437637	0.996508	0.997731
WBGene00002196	105.561	0.00060902	0.171852	0.00354387	0.997172	0.998193
WBGene00002198	32.9367	-0.00752744	0.219913	-0.0342292	0.972694	0.980664
WBGene00002199	0.361856	2.00222	2.11351	0.947344	0.343464	NA
WBGene00002200	0.336212	2.18546	2.5414	0.859945	0.38982	NA
WBGene00002201	521.061	-0.344538	0.113928	-3.02418	0.00249311	0.00824139
WBGene00002202	449.153	-0.294931	0.079457	-3.71183	0.000205763	0.000998548
WBGene00002203	69.8348	0.0957821	0.158327	0.604963	0.545203	0.64337
WBGene00002204	1.52071	1.77545	0.973139	1.82446	0.0680826	0.126639
WBGene00002205	0.0767846	0.901628	3.11654	0.289304	0.772349	NA
WBGene00002206	4.27268	1.61918	0.539489	3.00132	0.0026881	0.00878812
WBGene00002207	51.0262	-0.952747	0.231507	-4.11542	3.86e-05	0.000240949
WBGene00002208	5.72583	2.08657	0.596549	3.49774	0.000469217	0.00201199
WBGene00002210	27.5856	1.86659	0.286783	6.50872	7.58e-11	2.3e-09
WBGene00002211	5.11005	2.63047	0.594042	4.42809	9.51e-06	7.04e-05
WBGene00002212	8.46374	0.915897	0.480933	1.90442	0.0568558	0.109746
WBGene00002213	10.448	1.32881	0.494922	2.68489	0.00725526	0.0203513
WBGene00002214	630.926	-1.05522	0.16519	-6.38793	1.68e-10	4.74e-09
WBGene00002215	49.0797	-0.126076	0.201189	-0.626658	0.530884	0.629924
WBGene00002216	18.1781	0.176385	0.303574	0.581027	0.561222	0.657797
WBGene00002217	41.1873	1.26631	0.292511	4.32911	1.5e-05	0.000105004
WBGene00002218	67.3995	0.839011	0.26625	3.15121	0.00162594	0.00575228
WBGene00002219	7169.38	-0.769332	0.14663	-5.24676	1.55e-07	2.01e-06
WBGene00002220	462.556	0.759377	0.148004	5.1308	2.89e-07	3.47e-06
WBGene00002221	4607.15	-0.689705	0.180978	-3.81099	0.000138411	0.00071697
WBGene00002222	3405.88	-0.419839	0.156877	-2.67623	0.00744549	0.0208253
WBGene00002223	1119.9	-0.39832	0.0659705	-6.03785	1.56e-09	3.44e-08
WBGene00002224	2.90161	1.01066	0.747508	1.35204	0.176361	0.270145
WBGene00002225	5471.96	-0.662165	0.150727	-4.39313	1.12e-05	8.11e-05
WBGene00002226	5263.22	-0.632314	0.157409	-4.017	5.89e-05	0.000344798
WBGene00002227	4.53436	2.05846	0.621629	3.31139	0.000928337	0.00358952
WBGene00002228	5240.32	-0.715082	0.180677	-3.9578	7.56e-05	0.000426564
WBGene00002229	4682.68	-0.857639	0.202039	-4.24491	2.19e-05	0.000147212
WBGene00002230	1011.98	0.481002	0.11414	4.21415	2.51e-05	0.00016593
WBGene00002231	1470.9	-0.457953	0.159771	-2.86632	0.0041528	0.0126383
WBGene00002232	39.4875	1.31607	0.198487	6.63051	3.35e-11	1.1e-09
WBGene00002233	32.3056	-0.967584	0.333876	-2.89804	0.00375508	0.0116119
WBGene00002234	4.69533	1.56432	0.570209	2.74342	0.00608035	0.0175144
WBGene00002235	19.2832	1.88716	0.286671	6.58302	4.61e-11	1.48e-09
WBGene00002238	245.874	-0.473822	0.118059	-4.01342	5.98e-05	0.000349338
WBGene00002239	25.4866	0.632913	0.343199	1.84416	0.0651598	0.122341
WBGene00002240	449.802	-0.202859	0.0926513	-2.18949	0.0285611	0.0631626
WBGene00002241	252.44	-0.234141	0.120995	-1.93513	0.052974	0.103652
WBGene00002242	0.261654	0.814829	2.7182	0.299767	0.764355	NA
WBGene00002243	17.3718	0.520023	0.280869	1.85148	0.0641008	0.120711
WBGene00002244	280.88	0.069163	0.144843	0.477504	0.633003	0.719342
WBGene00002245	516.416	-0.10778	0.110445	-0.975872	0.329128	0.437195
WBGene00002246	990.742	0.41706	0.263072	1.58534	0.112888	0.189025
WBGene00002247	26.4044	-0.228518	0.258145	-0.885232	0.376031	0.483606
WBGene00002248	735.913	0.373521	0.154267	2.42127	0.0154662	0.0382551
WBGene00002249	99.6586	-0.409216	0.142676	-2.86814	0.00412889	0.0125851
WBGene00002250	234.859	-0.484448	0.169761	-2.85371	0.00432119	0.0130656
WBGene00002251	349.442	0.0378979	0.0815627	0.464647	0.642184	0.726866
WBGene00002252	3.33955	3.80472	1.06906	3.55896	0.000372328	0.00165596
WBGene00002253	418.067	-0.0983012	0.197267	-0.498315	0.618262	0.706152
WBGene00002254	0.752654	-0.0451633	1.29759	-0.0348056	0.972235	0.98044
WBGene00002255	8.93274	1.00611	0.433804	2.31928	0.0203801	0.0479779
WBGene00002256	70.2182	-0.21935	0.151587	-1.44702	0.14789	0.235003
WBGene00002257	2.34983	1.32692	0.783045	1.69456	0.090158	0.157958
WBGene00002258	1.49683	1.58487	1.03741	1.52772	0.126582	0.206933
WBGene00002259	0.746694	1.55439	1.26099	1.23268	0.217695	0.31697
WBGene00002260	1.20388	0.91093	1.00964	0.902232	0.366934	0.474585
WBGene00002261	54.1251	-0.350051	0.266734	-1.31236	0.189398	0.285381
WBGene00002262	38.5819	0.228524	0.20868	1.09509	0.273477	0.37825
WBGene00002263	504.578	1.32882	0.228429	5.81723	5.98e-09	1.12e-07
WBGene00002264	246.462	-0.584993	0.145911	-4.00924	6.09e-05	0.000354741
WBGene00002265	12.8104	2.35054	0.470477	4.99609	5.85e-07	6.41e-06
WBGene00002266	2.29494	1.01722	0.861597	1.18062	0.237754	0.339603
WBGene00002267	3.14827	0.650431	0.699563	0.929768	0.352491	0.460494
WBGene00002268	0.461792	0.67389	1.6488	0.408716	0.682748	NA
WBGene00002269	3.24275	1.58933	0.728401	2.18195	0.0291134	0.0642029
WBGene00002270	1.32995	1.52265	1.13257	1.34442	0.178812	0.273195
WBGene00002271	17.3007	2.81431	0.425745	6.61031	3.84e-11	1.24e-09
WBGene00002272	12.4517	2.21383	0.497264	4.45202	8.51e-06	6.42e-05
WBGene00002273	8.4962	2.22561	0.45199	4.92401	8.48e-07	8.91e-06
WBGene00002274	4.13505	1.92648	0.58634	3.2856	0.00101765	0.00387144
WBGene00002275	277.766	-0.0407638	0.0959867	-0.424682	0.671068	0.751228
WBGene00002276	1161.02	-0.450084	0.0660036	-6.81908	9.16e-12	3.42e-10
WBGene00002280	18.3838	2.4657	0.607126	4.06126	4.88e-05	0.00029465
WBGene00002282	12.4192	1.47611	0.365391	4.03982	5.35e-05	0.000318328
WBGene00002285	0	NA	NA	NA	NA	NA
WBGene00002295	151.459	-0.0800564	0.171182	-0.467669	0.640022	0.725136
WBGene00002297	562.447	-0.41788	0.169818	-2.46076	0.0138643	0.0349478
WBGene00002299	26.3718	2.48332	0.320212	7.75525	8.82e-15	6.06e-13
WBGene00002324	183.81	-0.306228	0.122698	-2.49579	0.0125678	0.0322456
WBGene00002335	294.648	-0.35998	0.110875	-3.24673	0.00116739	0.00434908
WBGene00002344	179.179	-0.326305	0.18312	-1.78192	0.0747631	0.136458
WBGene00002348	3.76489	0.98033	0.611548	1.60303	0.108928	0.183792
WBGene00002363	351.435	-0.413536	0.113487	-3.64391	0.000268527	0.00125377
WBGene00002368	1817.66	-0.710691	0.117508	-6.04801	1.47e-09	3.26e-08
WBGene00002393	5.51089	0.401129	0.598285	0.670464	0.502562	0.604296
WBGene00002497	2.54489	0.282241	0.656332	0.430028	0.667175	0.748238
WBGene00002583	576.229	-0.448115	0.0832912	-5.3801	7.44e-08	1.08e-06
WBGene00002601	3.24441	0.887329	0.673816	1.31687	0.187882	0.283756
WBGene00002632	128.41	0.0894319	0.184347	0.485128	0.627585	0.714594
WBGene00002637	1540.51	-0.87848	0.146389	-6.00099	1.96e-09	4.22e-08
WBGene00002694	1325.92	-0.463052	0.122156	-3.79067	0.000150242	0.000766864
WBGene00002696	345.767	-0.511509	0.0983129	-5.20287	1.96e-07	2.49e-06
WBGene00002717	655.999	-0.625545	0.146076	-4.28234	1.85e-05	0.000126806
WBGene00002783	132.105	-0.155964	0.13152	-1.18585	0.23568	0.337379
WBGene00002827	1.13415	0.284647	1.06117	0.268239	0.788515	0.844912
WBGene00002845	849.799	-0.501913	0.111603	-4.49731	6.88e-06	5.37e-05
WBGene00002850	1120.07	-0.676334	0.141343	-4.78506	1.71e-06	1.64e-05
WBGene00002855	155.991	0.0096101	0.143396	0.0670177	0.946568	0.963031
WBGene00002879	474.005	-0.519108	0.132421	-3.92014	8.85e-05	0.000487413
WBGene00002881	40.6325	1.63705	0.332895	4.91763	8.76e-07	9.15e-06
WBGene00002889	723.265	-0.407753	0.106968	-3.8119	0.000137903	0.000715047
WBGene00002891	73.4418	-0.0240644	0.135692	-0.177346	0.859236	0.89767
WBGene00002915	241.704	0.817317	0.280482	2.91397	0.00356859	0.0111496
WBGene00002957	570.167	-0.548431	0.14473	-3.78934	0.000151049	0.000770345
WBGene00002974	2.26995	0.101385	0.871495	0.116334	0.907388	0.934572
WBGene00002975	2.43825	1.69399	0.923217	1.83488	0.0665233	0.124377
WBGene00002976	1.19581	1.53844	1.26486	1.21629	0.223873	0.324052
WBGene00002977	2024.16	0.280941	0.112804	2.49054	0.0127551	0.0326346
WBGene00002978	289.239	-0.0546533	0.187828	-0.290975	0.77107	0.83131
WBGene00002979	59.4414	1.00696	0.226534	4.44506	8.79e-06	6.61e-05
WBGene00002980	413.848	-1.00906	0.0815326	-12.3762	3.52e-35	1.91e-32
WBGene00002981	195.038	-0.413261	0.178833	-2.31088	0.0208393	0.0488418
WBGene00002982	42.8994	-0.3336	0.189855	-1.75714	0.0788947	0.142163
WBGene00002983	10.2316	1.65408	0.638237	2.59164	0.00955197	0.0256131
WBGene00002985	533.219	-0.621646	0.187689	-3.31211	0.000925941	0.00358308
WBGene00002986	299.868	-0.302564	0.0924572	-3.27247	0.00106611	0.00401915
WBGene00002987	0.132226	0.901628	3.11654	0.289304	0.772349	NA
WBGene00002988	0.187674	1.34863	2.93915	0.45885	0.646342	NA
WBGene00002989	14.9897	1.24473	0.310661	4.00672	6.16e-05	0.000357577
WBGene00002990	1574.46	-0.0919371	0.0834177	-1.10213	0.270405	0.374743
WBGene00002991	84.4436	1.5338	0.218545	7.01823	2.25e-12	9.37e-11
WBGene00002992	159.126	0.150667	0.120227	1.25318	0.210139	0.308779
WBGene00002993	0.0715406	0.901628	3.11654	0.289304	0.772349	NA
WBGene00002994	2885.89	-0.833069	0.191179	-4.35752	1.32e-05	9.34e-05
WBGene00002996	115.627	0.161219	0.18929	0.851705	0.394378	0.501428
WBGene00002997	56.208	-0.801566	0.193648	-4.13929	3.48e-05	0.00022008
WBGene00002998	603.387	-0.649942	0.173976	-3.73582	0.000187106	0.000921006
WBGene00002999	41.7031	-0.402931	0.252238	-1.59743	0.110171	0.185473
WBGene00003000	1.36542	2.92276	1.47341	1.98367	0.0472929	0.0948083
WBGene00003001	43.1326	1.72375	0.212641	8.10636	5.22e-16	4.56e-14
WBGene00003002	1886.39	-0.714224	0.0977133	-7.30938	2.68e-13	1.37e-11
WBGene00003003	6.80887	1.75121	0.469831	3.72733	0.000193522	0.000947635
WBGene00003006	7.09343	1.32217	0.470439	2.8105	0.0049465	0.0146799
WBGene00003007	10.5404	1.17581	0.37529	3.13306	0.00172993	0.00606871
WBGene00003008	3.3489	1.99114	0.705207	2.82349	0.00475042	0.0141732
WBGene00003009	388.178	-0.627155	0.164685	-3.8082	0.00013998	0.000723568
WBGene00003010	160.805	0.222261	0.12018	1.8494	0.0644	0.121135
WBGene00003011	68.3682	-0.052393	0.185976	-0.281719	0.778159	0.836881
WBGene00003012	109.583	0.00248897	0.124348	0.0200162	0.98403	0.988216
WBGene00003014	15.643	-0.231188	0.302441	-0.764407	0.444625	0.550541
WBGene00003015	6.47458	0.344162	0.437695	0.786306	0.431688	0.538196
WBGene00003017	265.775	-1.02431	0.168632	-6.07424	1.25e-09	2.82e-08
WBGene00003018	0.919793	1.28119	1.2895	0.993554	0.32044	0.428011
WBGene00003019	2.02422	1.94516	0.83598	2.32681	0.0199755	0.0472354
WBGene00003020	589.725	-0.618757	0.0902033	-6.85958	6.91e-12	2.62e-10
WBGene00003021	1587.75	-0.601085	0.0657021	-9.14864	5.77e-20	7.85e-18
WBGene00003022	264.185	-0.758109	0.106306	-7.1314	9.94e-13	4.5e-11
WBGene00003024	3.1292	-0.6432	0.662317	-0.971136	0.33148	0.439805
WBGene00003025	1698	-0.0646535	0.0837007	-0.772437	0.439856	0.545774
WBGene00003026	454.487	-0.654331	0.195412	-3.34848	0.000812574	0.00319871
WBGene00003029	1.46783	1.99654	0.958971	2.08196	0.0373458	0.0784046
WBGene00003030	660.328	-0.690371	0.0710922	-9.71092	2.71e-22	4.92e-20
WBGene00003031	5.54377	1.08396	0.493633	2.19589	0.0281	0.0623116
WBGene00003033	4.91674	0.490175	0.507729	0.965426	0.334332	0.442643
WBGene00003034	872.497	-0.464765	0.17703	-2.62534	0.00865622	0.0236118
WBGene00003035	87.1245	0.569927	0.157499	3.61861	0.000296187	0.00136023
WBGene00003036	250.001	-0.490118	0.175821	-2.78759	0.00531013	0.015636
WBGene00003037	539.585	-0.417018	0.076405	-5.458	4.82e-08	7.28e-07
WBGene00003038	315.479	-0.398728	0.0880507	-4.5284	5.94e-06	4.75e-05
WBGene00003039	0.153569	1.43665	3.11218	0.461622	0.644352	NA
WBGene00003040	390.261	0.0949061	0.098465	0.963857	0.335118	0.443444
WBGene00003041	452.623	-0.424929	0.131086	-3.24161	0.00118857	0.00441874
WBGene00003043	151.835	0.0203144	0.107555	0.188875	0.850191	0.891642
WBGene00003044	268.219	-0.25967	0.106314	-2.44249	0.0145863	0.0364536
WBGene00003045	458.179	-0.285627	0.0810813	-3.52272	0.000427136	0.0018627
WBGene00003046	3.84105	-0.415422	0.585748	-0.709215	0.478191	0.581882
WBGene00003047	382.112	-0.315432	0.0718151	-4.39228	1.12e-05	8.14e-05
WBGene00003048	268.865	-0.373013	0.150731	-2.4747	0.013335	0.033875
WBGene00003052	887.257	-0.462699	0.125629	-3.68306	0.000230455	0.00110012
WBGene00003053	31.1173	-0.930934	0.276054	-3.37229	0.000745465	0.00297276
WBGene00003055	2.00046	0.564837	0.902851	0.625615	0.531567	0.630506
WBGene00003056	8.79256	-0.0275827	0.362931	-0.0759998	0.939419	0.957947
WBGene00003057	2.07451	-0.175215	0.835216	-0.209784	0.833836	0.879148
WBGene00003058	3.55245	1.34139	0.650034	2.06357	0.0390587	0.0812951
WBGene00003059	232.117	-0.852489	0.132483	-6.43471	1.24e-10	3.57e-09
WBGene00003060	578.537	-0.734339	0.141817	-5.17808	2.24e-07	2.78e-06
WBGene00003061	186.407	-0.598073	0.114144	-5.23966	1.61e-07	2.08e-06
WBGene00003062	390.468	-0.486056	0.122968	-3.9527	7.73e-05	0.000434384
WBGene00003063	672.003	-1.12484	0.168455	-6.67736	2.43e-11	8.26e-10
WBGene00003064	119.921	0.0451439	0.159629	0.282804	0.777327	0.836169
WBGene00003065	40.9761	0.432012	0.194721	2.21862	0.0265123	0.0594365
WBGene00003066	122.959	-0.102138	0.170894	-0.597667	0.550062	0.647745
WBGene00003067	5410.55	-0.360808	0.0848811	-4.25075	2.13e-05	0.000143819
WBGene00003068	56.4928	0.231911	0.198695	1.16717	0.243141	0.345661
WBGene00003071	11.9418	0.824085	0.376707	2.1876	0.0286985	0.0634234
WBGene00003072	73.5728	-0.2359	0.167398	-1.40922	0.158771	0.248568
WBGene00003073	352.859	-0.433652	0.162193	-2.67368	0.00750232	0.0209459
WBGene00003074	141.429	-0.12835	0.111119	-1.15507	0.248064	0.350903
WBGene00003075	600.752	-0.054777	0.144036	-0.3803	0.703723	0.777173
WBGene00003076	271.158	-1.13206	0.112121	-10.0968	5.71e-24	1.33e-21
WBGene00003077	53.175	0.135041	0.185887	0.726468	0.467552	0.571634
WBGene00003078	78.9738	-0.642346	0.141321	-4.5453	5.49e-06	4.42e-05
WBGene00003079	38.4693	0.191305	0.181322	1.05506	0.2914	0.397342
WBGene00003080	56.9816	-0.239596	0.182662	-1.31169	0.189624	0.285661
WBGene00003081	29.1027	0.719719	0.218527	3.2935	0.000989477	0.00378781
WBGene00003082	102.449	-0.35721	0.164259	-2.17467	0.029655	0.065199
WBGene00003083	126.772	0.072322	0.153705	0.470525	0.63798	0.723571
WBGene00003084	42.8577	-0.434109	0.239794	-1.81034	0.0702427	0.129768
WBGene00003085	915.813	-1.1995	0.151258	-7.93014	2.19e-15	1.74e-13
WBGene00003086	345.456	-0.581675	0.11452	-5.07922	3.79e-07	4.37e-06
WBGene00003087	78.0828	0.261907	0.154051	1.70013	0.0891064	0.156646
WBGene00003088	0	NA	NA	NA	NA	NA
WBGene00003089	61.1899	1.045	0.337857	3.09302	0.00198131	0.00680916
WBGene00003090	16.4716	3.15572	0.443613	7.11367	1.13e-12	5.03e-11
WBGene00003091	17.0768	3.43373	0.476739	7.20254	5.91e-13	2.82e-11
WBGene00003092	2.2923	1.82181	0.919099	1.98217	0.0474598	0.0950548
WBGene00003093	11.1296	0.907818	0.472505	1.92129	0.0546951	0.106393
WBGene00003094	2.68926	1.45113	0.734432	1.97585	0.0481716	0.0961274
WBGene00003095	0.890894	2.96805	1.25323	2.36833	0.0178685	0.0430442
WBGene00003096	4.14932	2.50469	0.688702	3.63683	0.000276013	0.0012827
WBGene00003097	4.26827	1.8773	0.617962	3.03788	0.00238245	0.0079372
WBGene00003098	5.41445	0.328109	0.51495	0.637167	0.524016	0.623588
WBGene00003099	0.497487	-1.33203	1.7862	-0.745734	0.455828	NA
WBGene00003100	7.54822	1.55461	0.462014	3.36485	0.000765858	0.00304355
WBGene00003102	79.3374	0.312643	0.284166	1.10021	0.27124	0.375713
WBGene00003104	0.727318	1.56522	1.32993	1.17692	0.239226	0.341359
WBGene00003106	0.484076	1.23371	1.6032	0.769529	0.441579	NA
WBGene00003107	32.6746	0.811592	0.22917	3.54144	0.000397949	0.00175477
WBGene00003111	22.5989	0.335918	0.276918	1.21306	0.225106	0.325356
WBGene00003112	1.20726	3.22997	2.93289	1.10129	0.27077	0.375142
WBGene00003114	0.121492	0.420736	3.11654	0.135001	0.892611	NA
WBGene00003119	764.848	-0.511234	0.121022	-4.22432	2.4e-05	0.000159201
WBGene00003123	286.444	-0.278429	0.116055	-2.39912	0.0164344	0.040216
WBGene00003124	1242.5	-0.237671	0.159585	-1.48931	0.136406	0.219929
WBGene00003129	154.013	-0.209775	0.141308	-1.48452	0.13767	0.221492
[truncated: 44,749 more rows]

## Sheet: sense_small_RNA_results_df
	baseMean	log2FoldChange	lfcSE	stat	pvalue	padj
WBGene00000001	54.6804	-0.112733	0.169068	-0.666792	0.504905	0.740878
WBGene00000002	0.414953	0.839531	1.59145	0.527527	0.597828	NA
WBGene00000003	1.16569	0.517641	1.08994	0.474924	0.634841	0.822338
WBGene00000004	1.07589	0.140802	1.12214	0.125477	0.900146	0.959249
WBGene00000005	0.449904	0.0713394	2.02534	0.0352234	0.971902	NA
WBGene00000006	0.734131	0.272206	1.24053	0.219428	0.826317	NA
WBGene00000007	0.829496	-0.158827	1.20295	-0.132031	0.89496	NA
WBGene00000008	0.162191	-0.46957	2.42807	-0.193393	0.846652	NA
WBGene00000009	0.539955	-0.270589	1.31442	-0.205863	0.836898	NA
WBGene00000010	1.58623	0.440422	0.905938	0.48615	0.626861	0.817863
WBGene00000012	0.0470882	-0.463818	3.11654	-0.148825	0.881692	NA
WBGene00000013	26.1102	8.19706	1.31106	6.25224	4.04613e-10	3.67186e-08
WBGene00000014	0.10895	0.0170758	3.11654	0.00547908	0.995628	NA
WBGene00000015	0.235227	0.995507	2.5783	0.38611	0.699415	NA
WBGene00000016	0.543732	1.39488	1.9077	0.731185	0.464666	NA
WBGene00000017	0.16095	0.996603	2.85257	0.349371	0.726811	NA
WBGene00000018	8.5623	2.23282	0.541362	4.12445	3.71615e-05	0.000706815
WBGene00000019	4.30528	2.79767	0.791211	3.53593	0.000406343	0.00505661
WBGene00000020	10.3479	2.44766	0.57364	4.26689	1.98216e-05	0.000419573
WBGene00000021	2.17629	0.451387	0.790686	0.570881	0.56808	0.782106
WBGene00000022	145.564	0.444744	0.212798	2.08999	0.0366189	0.148751
WBGene00000023	1.12764	0.378638	0.987657	0.38337	0.701446	0.862745
WBGene00000024	0.0990693	0.497967	3.11654	0.159782	0.873053	NA
WBGene00000025	3.20788	0.0758123	0.643304	0.117848	0.906188	0.96225
WBGene00000026	0.0470882	-0.463818	3.11654	-0.148825	0.881692	NA
WBGene00000027	0.322144	-0.0121515	2.07673	-0.00585127	0.995331	NA
WBGene00000028	0.330531	-1.03795	2.04626	-0.50724	0.611987	NA
WBGene00000029	0.0531084	-0.463818	3.11654	-0.148825	0.881692	NA
WBGene00000030	0.22632	1.43219	2.20136	0.650592	0.51531	NA
WBGene00000031	2.08385	0.0209712	0.720518	0.0291057	0.97678	0.991567
WBGene00000032	0.155945	0.0170772	2.88322	0.00592295	0.995274	NA
WBGene00000033	0.414903	1.54708	1.69563	0.912394	0.361561	NA
WBGene00000034	28.326	-0.678659	0.278417	-2.43756	0.0147867	0.0788115
WBGene00000035	0.88945	0.825773	1.38386	0.596717	0.550696	0.771318
WBGene00000036	1.17497	1.72617	1.07982	1.59858	0.109915	0.308234
WBGene00000037	1.10362	0.622707	1.0198	0.610617	0.541453	0.765157
WBGene00000038	0.31098	-0.415787	1.67823	-0.247753	0.804325	NA
WBGene00000039	4.49454	0.533808	0.531476	1.00439	0.315191	0.575501
WBGene00000040	7.88521	-0.524603	0.424506	-1.2358	0.216534	0.463756
WBGene00000041	21.0085	-0.116055	0.271611	-0.427283	0.669173	0.842939
WBGene00000042	0.105214	-0.951395	3.10966	-0.305948	0.759644	NA
WBGene00000043	0.393116	0.922896	1.94281	0.475031	0.634765	NA
WBGene00000044	1.41926	2.18976	1.05615	2.07334	0.0381409	0.152788
WBGene00000045	0.414829	2.18346	1.69143	1.29089	0.19674	NA
WBGene00000046	1.67337	3.14126	1.04949	2.99312	0.00276142	0.0225311
WBGene00000047	2.09581	2.30792	0.960902	2.40183	0.0163134	0.084407
WBGene00000048	0.921868	3.33195	1.49165	2.23373	0.0255006	0.116203
WBGene00000049	0.934085	0.55167	1.06552	0.517747	0.604635	0.803636
WBGene00000050	0.929833	1.56047	1.18948	1.31189	0.189557	0.4296
WBGene00000051	0.366492	0.0963377	2.37217	0.0406116	0.967606	NA
WBGene00000053	1.94291	1.30557	1.01784	1.28269	0.199601	0.443467
WBGene00000054	0.298422	-0.892199	1.83532	-0.486128	0.626877	NA
WBGene00000055	6.43239	-0.220655	0.410198	-0.537923	0.59063	0.795197
WBGene00000056	0.809616	1.00614	1.28187	0.784898	0.432513	NA
WBGene00000057	2.19361	0.913637	0.784827	1.16413	0.244373	0.49628
WBGene00000058	1.11902	1.6447	1.14739	1.43343	0.151736	0.375184
WBGene00000059	11.1923	-0.401433	0.344079	-1.16669	0.243336	0.494881
WBGene00000060	0.259122	0.0143894	2.17752	0.00660815	0.994727	NA
WBGene00000061	0.183246	0.017078	2.7395	0.00623398	0.995026	NA
WBGene00000062	0.217197	0.997413	3.11491	0.320206	0.748812	NA
WBGene00000063	59.8193	-0.64284	0.25386	-2.53226	0.011333	0.0651235
WBGene00000064	16.3829	-0.745152	0.301322	-2.47294	0.0134005	0.073348
WBGene00000065	4.85263	0.542504	0.559719	0.969243	0.332424	0.592508
WBGene00000066	43.9449	-0.0546281	0.230299	-0.237205	0.812498	0.920148
WBGene00000067	17.9572	-0.259046	0.291106	-0.889865	0.373538	0.631672
WBGene00000068	1.41745	1.40311	0.957104	1.46599	0.142651	0.360718
WBGene00000069	0.75025	0.507479	1.36011	0.373116	0.709062	NA
WBGene00000070	3.34658	1.77918	0.702596	2.5323	0.0113317	0.0651235
WBGene00000071	1.28089	1.52868	1.09235	1.39943	0.161683	0.389336
WBGene00000072	1.11281	0.163256	0.959221	0.170196	0.864856	0.944929
WBGene00000073	1.21627	0.0491825	1.01858	0.0482853	0.961489	0.985561
WBGene00000074	27.18	1.48483	0.435983	3.40571	0.000659916	0.0074218
WBGene00000075	1.76072	-0.621586	0.900396	-0.690348	0.489975	0.728939
WBGene00000079	10.1106	-0.0668742	0.365243	-0.183095	0.854723	0.940014
WBGene00000080	2.3827	0.381373	0.717077	0.531844	0.594834	0.797333
WBGene00000081	23.1409	0.715178	0.282147	2.53477	0.011252	0.0648386
WBGene00000082	9.77401	1.25114	0.398156	3.14233	0.00167607	0.0152999
WBGene00000083	3.24415	0.111458	0.564632	0.197399	0.843516	0.935224
WBGene00000084	1.51971	1.68803	1.06216	1.58924	0.112007	0.311679
WBGene00000085	0.528661	0.0395278	1.40908	0.0280521	0.977621	NA
WBGene00000086	2.42295	1.37831	0.911098	1.5128	0.130329	0.342125
WBGene00000088	8.82932	0.592164	0.42384	1.39714	0.162371	0.390117
WBGene00000089	1.86981	-0.336616	0.760671	-0.442525	0.658109	0.836163
WBGene00000090	4.61372	-0.0714956	0.565526	-0.126423	0.899397	0.959141
WBGene00000092	1.2302	-0.834114	0.938622	-0.888658	0.374187	0.632392
WBGene00000093	3.28137	-1.31292	0.630264	-2.08312	0.0372404	0.150345
WBGene00000094	22.7585	-1.06861	0.311752	-3.42776	0.000608587	0.00695452
WBGene00000095	5.14247	-0.386884	0.538017	-0.719092	0.472085	0.713648
WBGene00000096	0.372048	1.13471	1.99463	0.568881	0.569437	NA
WBGene00000097	2.72046	0.91005	0.646843	1.40691	0.159454	0.386097
WBGene00000098	6.41718	-0.383316	0.420167	-0.912294	0.361614	0.621236
WBGene00000099	2.72211	-0.465387	0.646718	-0.719613	0.471763	0.713605
WBGene00000100	8.18998	0.476094	0.422655	1.12643	0.259982	0.515761
WBGene00000101	15.6472	0.101169	0.304924	0.331784	0.740052	0.88215
WBGene00000102	6.96994	-0.112478	0.420002	-0.267804	0.78885	0.90774
WBGene00000103	1.28123	1.74663	1.02519	1.70371	0.0884354	0.268729
WBGene00000105	23.1569	0.813283	0.484163	1.67977	0.0930018	0.277847
WBGene00000106	7.03417	0.377421	0.420443	0.897676	0.369359	0.628187
WBGene00000107	8.53486	-0.422139	0.396813	-1.06382	0.287409	0.545184
WBGene00000108	0.113986	0.0170758	3.11654	0.00547908	0.995628	NA
WBGene00000109	9.07916	0.687033	0.413707	1.66067	0.0967788	0.285172
WBGene00000110	4.59371	-0.486961	0.523979	-0.929352	0.352707	0.613476
WBGene00000111	1.21271	1.87711	1.02156	1.83749	0.0661381	0.222138
WBGene00000112	3.25569	-0.0717688	0.607602	-0.118118	0.905974	0.962143
WBGene00000113	3.47163	0.125096	0.634496	0.197158	0.843704	0.93535
WBGene00000114	19.9102	-0.0736639	0.319577	-0.230504	0.8177	0.92237
WBGene00000115	9.74793	-1.21484	0.45882	-2.64774	0.00810311	0.0513357
WBGene00000116	1.52356	0.410838	0.904341	0.454296	0.649616	0.831278
WBGene00000117	3.22279	1.48097	0.775553	1.90957	0.0561886	0.198618
WBGene00000118	1.5765	-0.332093	1.02227	-0.324857	0.745289	0.884819
WBGene00000120	0.689362	-0.618402	1.26428	-0.489132	0.624748	NA
WBGene00000121	3.52533	0.122966	0.576246	0.213391	0.831022	0.929274
WBGene00000122	6.84558	0.288242	0.432663	0.666206	0.505279	0.741236
WBGene00000123	25.6979	0.452242	0.400156	1.13016	0.258408	0.51384
WBGene00000133	0.326633	-0.463461	2.01742	-0.229729	0.818302	NA
WBGene00000134	0.540409	0.889887	1.44383	0.616337	0.537672	NA
WBGene00000135	0.419555	2.21314	1.69288	1.30732	0.191103	NA
WBGene00000136	1.09671	-0.022079	1.49084	-0.0148098	0.988184	0.994937
WBGene00000137	1.54404	-1.50554	0.910134	-1.6542	0.0980871	0.287636
WBGene00000138	2.57675	3.33121	0.944432	3.52721	0.00041997	0.00519067
WBGene00000139	1.96877	2.33277	0.869414	2.68315	0.0072933	0.0474565
WBGene00000140	126.743	1.23477	0.209771	5.88628	3.94973e-09	2.76174e-07
WBGene00000142	2.41534	2.01448	0.787028	2.5596	0.0104792	0.0618607
WBGene00000143	3.06457	-0.299953	0.657735	-0.456039	0.648362	0.830651
WBGene00000144	0.624785	-1.15758	1.63816	-0.706635	0.479793	NA
WBGene00000145	8.97352	-0.678023	0.37648	-1.80095	0.0717103	0.234198
WBGene00000146	6.98535	-0.0642341	0.424006	-0.151493	0.879587	0.951655
WBGene00000147	1.2428	0.0558598	0.917504	0.0608824	0.951453	0.980983
WBGene00000148	2.21604	-0.0185715	0.711179	-0.0261137	0.979167	0.992246
WBGene00000149	11.9524	2.15991	0.403036	5.35911	8.36336e-08	3.75493e-06
WBGene00000150	1.24784	2.71298	1.14572	2.36792	0.0178882	0.0900534
WBGene00000151	3.24263	-0.509497	0.632217	-0.805889	0.420307	0.672983
WBGene00000155	7.26018	-0.660466	0.424264	-1.55674	0.119533	0.32407
WBGene00000156	6.34465	-0.177303	0.417568	-0.424609	0.671122	0.844056
WBGene00000157	0.514373	-1.01712	1.42076	-0.715895	0.474056	NA
WBGene00000158	6.47372	0.868514	0.536959	1.61747	0.105777	0.301884
WBGene00000159	3.24066	0.086948	0.565829	0.153665	0.877874	0.950464
WBGene00000160	6.06807	0.135388	0.476348	0.28422	0.776242	0.901556
WBGene00000161	3.78023	0.57764	0.590341	0.978486	0.327834	0.587827
WBGene00000162	6.5848	0.744862	0.479587	1.55313	0.120392	0.325135
WBGene00000163	22.7836	-0.975705	0.279759	-3.48767	0.000487254	0.00585426
WBGene00000164	1.04638	0.0224193	1.20809	0.0185576	0.985194	0.993956
WBGene00000165	1.23335	0.425149	0.997664	0.426145	0.670002	0.843423
WBGene00000166	0.487683	0.754572	1.97647	0.381778	0.702626	NA
WBGene00000168	4.02589	0.585502	0.623261	0.939417	0.347516	0.608659
WBGene00000169	1.66391	-0.631442	0.956834	-0.659929	0.509299	0.743796
WBGene00000170	5.48595	1.22804	0.587082	2.09176	0.0364597	0.148387
WBGene00000171	0.316266	1.77756	2.42307	0.733598	0.463194	NA
WBGene00000172	0.581595	1.86768	1.36311	1.37016	0.170636	NA
WBGene00000173	0.112819	0.968774	3.11562	0.310941	0.755846	NA
WBGene00000174	0.191999	0.97516	2.7016	0.360956	0.718133	NA
WBGene00000175	20.2435	-0.469853	0.274856	-1.70945	0.0873669	0.266816
WBGene00000176	2.88916	0.505506	0.710887	0.711092	0.477027	0.717721
WBGene00000177	2.97493	-0.897325	0.710529	-1.2629	0.206626	0.451781
WBGene00000178	1.54298	-0.147362	0.871395	-0.16911	0.86571	0.944929
WBGene00000179	1.01033	-0.0213461	1.0533	-0.0202658	0.983831	0.993934
WBGene00000180	1.69414	1.89094	1.00634	1.87902	0.0602424	0.20814
WBGene00000181	3.58065	0.541961	0.603001	0.898773	0.368774	0.627614
WBGene00000182	10.6131	0.236092	0.338862	0.69672	0.485978	0.725205
WBGene00000183	6.0227	0.0483957	0.463833	0.104339	0.9169	0.966646
WBGene00000184	1.87007	-0.339382	0.802457	-0.422929	0.672347	0.845128
WBGene00000185	0.736242	0.485629	1.49581	0.324659	0.745439	NA
WBGene00000186	6.41358	0.531953	0.443541	1.19933	0.230398	0.479077
WBGene00000187	1.93621	-0.0085414	0.827433	-0.0103228	0.991764	0.995825
WBGene00000188	0.265161	0.0320148	2.16371	0.0147963	0.988195	NA
WBGene00000189	2.66548	-0.213915	0.647805	-0.330215	0.741237	0.882179
WBGene00000190	1.02482	1.71713	1.17031	1.46724	0.14231	0.360234
WBGene00000191	0.263509	1.53099	2.13652	0.716581	0.473633	NA
WBGene00000192	2.87279	-0.527803	0.685298	-0.770179	0.441194	0.690316
WBGene00000193	0.259672	-0.500878	2.13339	-0.23478	0.81438	NA
WBGene00000195	1.49543	-1.71588	0.911847	-1.88177	0.0598676	0.207307
WBGene00000196	2.03892	0.283067	0.766038	0.36952	0.71174	0.868784
WBGene00000197	26.0496	-0.217842	0.279424	-0.779611	0.43562	0.685066
WBGene00000198	5.8295	0.374661	0.515898	0.726231	0.467697	0.711302
WBGene00000199	4.87871	-0.193565	0.529522	-0.365547	0.714703	0.871136
WBGene00000200	3.40985	0.737322	0.653388	1.12846	0.259125	0.514541
WBGene00000201	3.64015	-0.391891	0.580196	-0.675445	0.499393	0.736018
WBGene00000202	1.98963	0.113114	0.769941	0.146912	0.883201	0.953005
WBGene00000203	2.07674	-1.11818	0.916473	-1.22009	0.222431	0.470168
WBGene00000204	2.50686	-0.445855	0.673184	-0.662308	0.507774	0.743106
WBGene00000205	2.36227	1.07169	0.69572	1.5404	0.123462	0.330466
WBGene00000206	5.45065	-0.376895	0.516287	-0.73001	0.465384	0.709365
WBGene00000207	4.86407	-0.110089	0.481163	-0.228797	0.819026	0.922965
WBGene00000208	2.95549	0.6457	0.624912	1.03327	0.30148	0.561338
WBGene00000209	3.36844	0.461426	0.613258	0.752417	0.4518	0.698641
WBGene00000210	1.46326	-0.265792	1.03772	-0.256131	0.797849	0.912941
WBGene00000211	4.37928	0.283212	0.583748	0.485161	0.627562	0.818235
WBGene00000212	0.675842	-1.71795	1.58981	-1.0806	0.279876	NA
WBGene00000213	0.806606	1.1253	1.21212	0.92837	0.353215	NA
WBGene00000214	40.1745	1.07561	0.289794	3.71162	0.000205936	0.0029206
WBGene00000215	8.23911	-1.14231	0.412654	-2.76821	0.00563658	0.0389335
WBGene00000216	19.7802	-0.491211	0.319571	-1.5371	0.12427	0.331678
WBGene00000217	12.2675	-0.0794514	0.331434	-0.23972	0.810547	0.919159
WBGene00000218	6.2161	-1.53348	0.513961	-2.98365	0.00284831	0.0231075
WBGene00000219	29.4409	0.943343	0.287962	3.27594	0.00105313	0.0106822
WBGene00000220	0.724089	2.3856	1.40239	1.70109	0.0889259	NA
WBGene00000221	2.0998	0.0505037	0.891623	0.0566424	0.95483	0.982331
WBGene00000222	1.14974	-0.676371	1.00883	-0.670449	0.502572	0.738552
WBGene00000223	6.17309	0.968766	0.461132	2.10084	0.0356548	0.146333
WBGene00000224	2.25917	1.47414	0.800792	1.84085	0.0656438	0.220985
WBGene00000225	2.11141	1.12539	0.857364	1.31262	0.18931	0.429292
WBGene00000226	15.2379	0.0990346	0.300326	0.329757	0.741583	0.882298
WBGene00000227	14.8052	0.558886	0.362893	1.54009	0.12354	0.330621
WBGene00000228	6.33809	0.316845	0.441443	0.717747	0.472913	0.713952
WBGene00000229	37.7218	-0.664609	0.239576	-2.7741	0.00553544	0.0384357
WBGene00000230	6.88437	0.46543	0.444058	1.04813	0.29458	0.553373
WBGene00000231	11.4184	0.525807	0.395357	1.32995	0.183533	0.421605
WBGene00000232	50.1216	8.15736	1.17217	6.95917	3.42272e-12	4.85086e-10
WBGene00000233	1.79947	2.0695	0.936667	2.20943	0.0271446	0.12117
WBGene00000235	3.3222	1.73248	0.662384	2.61552	0.00890916	0.0551486
WBGene00000236	6.13309	-0.39801	0.445218	-0.893967	0.37134	0.629889
WBGene00000237	4.78054	1.10301	0.605318	1.8222	0.0684248	0.227073
WBGene00000238	1.12362	1.96959	1.08722	1.81158	0.0700515	0.230679
WBGene00000239	1.07935	0.297218	1.1757	0.2528	0.800423	0.914363
WBGene00000240	4.64489	1.08381	0.527897	2.05308	0.0400652	0.157974
WBGene00000241	3.04517	1.76728	0.989693	1.78568	0.0741504	0.239508
WBGene00000242	0.48596	1.6495	1.6591	0.994215	0.320118	NA
WBGene00000244	0.660829	1.23268	1.70138	0.724522	0.468745	NA
WBGene00000245	0.895312	-2.10419	1.25268	-1.67975	0.0930064	0.277847
WBGene00000246	0.932687	0.973195	1.09327	0.890172	0.373374	0.631581
WBGene00000247	5.00229	-0.686332	0.524625	-1.30823	0.190794	0.431328
WBGene00000248	4.62967	0.505977	0.523727	0.966107	0.333991	0.594307
WBGene00000249	2.89661	-0.93327	0.719831	-1.29651	0.194799	0.436322
WBGene00000250	130.483	0.543321	1.22421	0.443814	NA	NA
WBGene00000251	0.839045	2.52331	1.3285	1.89937	0.0575159	NA
WBGene00000252	1.52707	0.0527078	0.90728	0.0580943	0.953673	0.981933
WBGene00000253	3.82666	0.979668	0.705079	1.38944	0.164698	0.393379
WBGene00000254	12.4721	0.193143	0.336282	0.574348	0.565733	0.781599
WBGene00000255	1.17274	1.3579	1.30172	1.04316	0.296872	0.556281
WBGene00000256	0.613827	-0.106211	1.31524	-0.0807547	0.935637	NA
WBGene00000257	17.7866	-0.719913	0.317609	-2.26666	0.0234108	0.109159
WBGene00000259	4.15311	0.135326	0.547094	0.247353	0.804635	0.916531
WBGene00000262	3.36624	-0.413	0.631411	-0.654091	0.513053	0.746644
WBGene00000263	1.78849	-0.863347	0.775957	-1.11262	0.265871	0.522062
WBGene00000264	7.54951	0.278324	0.450583	0.617698	0.536774	0.762471
WBGene00000265	13.8531	1.34541	0.657698	2.04564	0.0407919	0.159954
WBGene00000266	1.55755	1.02291	1.20548	0.848554	0.39613	0.650732
WBGene00000267	2.15065	0.467977	0.697133	0.671288	0.502037	0.738193
WBGene00000268	2.38662	1.09491	0.802836	1.3638	0.172631	0.405348
WBGene00000269	2.18693	1.32097	0.822421	1.6062	0.108231	0.305464
WBGene00000270	154.044	-0.273023	0.149648	-1.82443	0.0680865	0.226305
WBGene00000271	22.4145	-0.812292	0.300952	-2.69908	0.00695324	0.0456793
WBGene00000272	0.163788	0.481825	2.88286	0.167134	0.867264	NA
WBGene00000273	8.54922	-0.419397	0.470108	-0.89213	0.372323	0.630617
WBGene00000274	9.86938	0.8394	0.395776	2.12089	0.0339307	0.141719
WBGene00000275	21.9505	-0.702877	0.281098	-2.50047	0.0124028	0.0694922
WBGene00000276	5.73668	0.614254	0.485924	1.26409	0.206196	0.451304
WBGene00000277	3.38674	0.761153	0.566883	1.3427	0.17937	0.41534
WBGene00000279	1.02463	-0.266447	1.06279	-0.250706	0.802042	0.915048
WBGene00000280	0.560495	0.714568	1.55977	0.458125	0.646863	NA
WBGene00000281	1.09326	0.920789	1.08595	0.847913	0.396486	0.651054
WBGene00000282	2.8221	0.967255	0.724479	1.3351	0.181842	0.419245
WBGene00000283	0.415438	0.287471	2.03571	0.141214	0.887701	NA
WBGene00000284	1.23152	0.608833	0.98455	0.618387	0.53632	0.762005
WBGene00000285	0.670916	-1.02763	1.35304	-0.759498	0.447555	NA
WBGene00000286	0.671919	0.368834	1.52808	0.24137	0.809268	NA
WBGene00000287	0.960595	2.65807	1.43964	1.84634	0.0648432	0.219067
WBGene00000288	0.117722	0.974961	3.11547	0.312942	0.754324	NA
WBGene00000289	16.3591	0.417685	0.285258	1.46424	0.143129	0.361391
WBGene00000292	3.31969	-0.109999	0.657617	-0.16727	0.867158	0.945095
WBGene00000293	24.9399	-0.960434	0.251522	-3.8185	0.000134268	0.00206559
WBGene00000294	5.07284	1.38479	0.576705	2.40121	0.0163411	0.084407
WBGene00000295	1.07036	0.47532	1.01316	0.469144	0.638966	0.824038
WBGene00000296	1.15386	2.59196	1.10109	2.35399	0.0185731	0.0924635
WBGene00000298	2.81658	-0.549857	0.660421	-0.832586	0.405078	0.658885
WBGene00000301	7.707	0.0872604	0.424867	0.205383	0.837273	0.931697
WBGene00000302	0.64632	2.15876	1.60885	1.3418	0.179659	NA
WBGene00000308	175.993	-0.0977663	0.29911	-0.326857	0.743776	0.883674
WBGene00000310	10.7655	0.679688	0.332258	2.04567	0.0407892	0.159954
WBGene00000311	7.34136	1.24611	0.429364	2.90221	0.00370534	0.0283738
WBGene00000366	12.4525	0.511132	0.326524	1.56537	0.117496	0.320736
WBGene00000367	3.59631	1.47077	0.596763	2.46458	0.0137173	0.0745086
WBGene00000368	0.857118	0.397406	1.20528	0.329721	0.741611	NA
WBGene00000369	6.41518	-0.28236	0.446124	-0.632917	0.526788	0.754999
WBGene00000370	4.01034	-0.246318	0.602845	-0.408592	0.682839	0.850964
WBGene00000371	4.5731	-0.446115	0.498491	-0.894931	0.370824	0.62922
WBGene00000372	0.221768	0.838578	2.2626	0.370626	0.710916	NA
WBGene00000373	2.01532	1.81942	0.826161	2.20226	0.0276469	0.122706
WBGene00000374	8.02665	1.39074	0.397454	3.49912	0.000466794	0.00565085
WBGene00000375	2.9683	0.196481	0.624742	0.314499	0.753142	0.889387
WBGene00000376	23.3598	0.408398	0.307441	1.32838	0.184054	0.422403
WBGene00000377	10.5661	-0.731092	0.344163	-2.12426	0.0336481	0.140942
WBGene00000378	11.7264	-0.192093	0.346648	-0.554144	0.57948	0.788147
WBGene00000379	10.8923	-0.199668	0.410832	-0.486009	0.626961	0.817907
WBGene00000380	13.4573	0.0471702	0.350304	0.134655	0.892885	0.956929
WBGene00000381	12.1364	-0.19673	0.343536	-0.572662	0.566874	0.782006
WBGene00000382	4.13203	-0.241716	0.522722	-0.462417	0.643782	0.827325
WBGene00000383	9.72396	0.397951	0.393344	1.01171	0.311675	0.571834
WBGene00000386	6.17236	-0.99897	0.541247	-1.84568	0.0649382	0.219189
WBGene00000387	4.45531	-0.278503	0.501418	-0.55543	0.5786	0.787515
WBGene00000388	1.54126	-1.78252	1.01863	-1.74992	0.0801321	0.251599
WBGene00000389	0.223069	0.0212181	2.26546	0.00936591	0.992527	NA
WBGene00000390	3.21049	0.813717	0.641789	1.26789	0.204838	0.449427
WBGene00000391	0.98852	0.652641	1.09797	0.594406	0.55224	0.772213
WBGene00000392	2.75022	1.16787	0.781316	1.49475	0.134979	0.348974
WBGene00000393	1.71078	1.44697	0.877422	1.64911	0.0991249	0.289485
WBGene00000395	8.27645	2.63027	0.569588	4.61785	3.87742e-06	0.000107565
WBGene00000396	14.8763	0.138903	0.388477	0.357557	0.720675	0.874248
WBGene00000397	1.54611	1.69708	0.917272	1.85014	0.0642931	0.217757
WBGene00000399	1.43647	0.0278412	1.08533	0.0256523	0.979535	0.992297
WBGene00000401	0.175866	0.515592	2.81904	0.182897	0.854879	NA
WBGene00000402	10.196	2.69468	0.657048	4.10119	4.11033e-05	0.000766409
WBGene00000403	4.53455	1.87281	0.706452	2.65101	0.00802526	0.0510511
WBGene00000405	46.617	-0.831826	0.245103	-3.39379	0.000689336	0.00765177
WBGene00000406	1.69823	0.735924	1.0164	0.724049	0.469036	0.711815
WBGene00000407	2.8952	0.389681	0.641056	0.607874	0.543271	0.766462
WBGene00000408	9.11048	0.459806	0.370227	1.24196	0.214253	0.460888
WBGene00000409	4.01645	-0.0900346	0.532939	-0.16894	0.865844	0.944929
WBGene00000410	4.42081	0.0384494	0.57727	0.0666056	0.946896	0.97938
WBGene00000411	5.57591	-0.0545671	0.460785	-0.118422	0.905733	0.962112
WBGene00000412	0.441514	1.66081	1.55017	1.07137	0.284003	NA
WBGene00000413	4.04968	-0.163794	0.569536	-0.287593	0.773658	0.900539
WBGene00000414	1.32921	1.00929	0.990607	1.01887	0.308267	0.568147
WBGene00000415	25.5697	-0.234297	0.237162	-0.98792	0.323192	0.58312
WBGene00000416	1.68603	-0.868472	0.795933	-1.09114	0.275212	0.531844
WBGene00000417	5.28466	-0.190184	0.505741	-0.376051	0.706879	0.866267
WBGene00000418	3.39358	-0.216493	0.636537	-0.340111	0.733773	0.880334
WBGene00000419	7.39255	-0.222359	0.422528	-0.526259	0.598708	0.800244
WBGene00000420	85.9663	-0.368478	0.244392	-1.50773	0.131623	0.344155
WBGene00000421	10.363	0.117291	0.354835	0.33055	0.740984	0.882179
WBGene00000422	2.85805	2.13359	0.818486	2.60676	0.00914036	0.0561757
WBGene00000423	3.80986	0.670173	0.559594	1.19761	0.231071	0.479949
WBGene00000424	2.98556	0.0927319	0.700798	0.132323	0.894729	0.957523
WBGene00000425	0.716792	0.4524	1.21175	0.373345	0.708892	NA
WBGene00000426	5.11017	0.0692375	0.48309	0.143322	0.886036	0.954547
WBGene00000427	0.109083	0.0170758	3.11654	0.00547908	0.995628	NA
WBGene00000428	0.328521	-0.463458	2.0168	-0.229799	0.818248	NA
WBGene00000429	5.14067	0.587884	0.477124	1.23214	0.217896	0.465339
WBGene00000430	4.07159	-0.0623043	0.538308	-0.115741	0.907858	0.963184
WBGene00000431	0.316238	-0.0104681	1.84617	-0.0056702	0.995476	NA
WBGene00000432	0.160704	0.0170774	2.85572	0.00598005	0.995229	NA
WBGene00000433	0.518633	-0.300647	1.43162	-0.210005	0.833663	NA
WBGene00000434	13.6798	4.22115	0.713542	5.91576	3.30345e-09	2.32893e-07
WBGene00000435	0.406947	0.53748	1.62525	0.330705	0.740867	NA
WBGene00000436	0	NA	NA	NA	NA	NA
WBGene00000437	0.515058	-0.0600967	1.77325	-0.0338907	0.972964	NA
WBGene00000438	0.801975	2.49043	1.30878	1.90286	0.0570584	NA
WBGene00000439	0.136158	0.497967	3.11654	0.159782	0.873053	NA
WBGene00000440	0	NA	NA	NA	NA	NA
WBGene00000441	0.913938	-0.185379	1.17451	-0.157835	0.874587	0.949143
WBGene00000442	10.5917	-0.690726	0.389947	-1.77133	0.0765057	0.244248
WBGene00000443	6.04879	0.833138	0.465722	1.78892	0.0736281	0.238136
WBGene00000444	2.41592	1.63407	0.839505	1.94647	0.051598	0.18762
WBGene00000445	0.458713	0.52994	1.59536	0.332176	0.739757	NA
WBGene00000446	1.29451	3.33177	1.14509	2.90961	0.00361878	0.0278988
WBGene00000447	0.462581	1.41594	1.56652	0.903878	0.36606	NA
WBGene00000448	0.929133	3.30196	1.31071	2.51922	0.0117617	0.0669109
WBGene00000449	0.628386	-0.926214	1.39089	-0.665913	0.505467	NA
WBGene00000450	0	NA	NA	NA	NA	NA
WBGene00000451	0.406833	0.582277	1.63112	0.356979	0.721107	NA
WBGene00000452	0.170479	0.996421	2.80171	0.355648	0.722104	NA
WBGene00000453	1.73032	1.28844	0.903453	1.42613	0.15383	0.377795
WBGene00000454	0.108598	0.497967	3.11654	0.159782	0.873053	NA
WBGene00000455	1.62525	3.05468	1.06612	2.86523	0.00416708	0.0311409
WBGene00000457	0.544073	1.95714	1.39202	1.40598	0.159731	NA
WBGene00000458	0.819983	-0.22517	1.34171	-0.167823	0.866723	NA
WBGene00000459	6.26597	0.232692	0.449623	0.517528	0.604788	0.803666
WBGene00000460	2.01322	0.908759	0.869177	1.04554	0.295774	0.554797
WBGene00000461	0.508462	-0.300166	1.43005	-0.209899	0.833746	NA
WBGene00000462	1.1356	-1.82167	1.42888	-1.27489	0.202347	0.446545
WBGene00000463	0.976133	-0.363329	1.22195	-0.297336	0.76621	0.896285
WBGene00000464	5.78447	0.858224	0.469874	1.8265	0.067775	0.225665
WBGene00000465	79.6585	0.797139	0.278234	2.86499	0.00417017	0.0311503
WBGene00000466	3.93809	0.00292311	0.523503	0.00558374	0.995545	0.997416
WBGene00000467	4.79002	0.522117	0.524108	0.9962	0.319153	0.579632
WBGene00000468	0.205267	0.0170785	2.64423	0.00645878	0.994847	NA
WBGene00000469	0.775294	0.158725	1.28003	0.124001	0.901314	NA
WBGene00000472	11.5441	0.190469	0.33572	0.567344	0.570481	0.783015
WBGene00000473	35.2348	-0.461873	0.284818	-1.62164	0.10488	0.300128
WBGene00000474	15.8422	-0.284481	0.361333	-0.787309	0.431101	0.68203
WBGene00000475	13.8785	0.357309	0.355344	1.00553	0.314642	0.574834
WBGene00000476	0.580346	-1.84598	1.61496	-1.14305	0.253019	NA
WBGene00000477	4.84998	0.217956	0.642843	0.33905	0.734572	0.880536
WBGene00000478	1.90443	1.36148	0.885793	1.53701	0.12429	0.331678
WBGene00000479	45.2664	-0.481938	0.254273	-1.89535	0.0580455	0.202933
WBGene00000480	22.5645	-0.250448	0.308052	-0.813006	0.416215	0.669341
WBGene00000481	0.613811	1.18461	1.40132	0.845357	0.397911	NA
WBGene00000482	7.98989	1.3021	0.450983	2.88725	0.00388629	0.0294947
WBGene00000483	0.858095	0.156606	1.21867	0.128506	0.897748	NA
WBGene00000484	0.36809	0.121496	1.63685	0.0742253	0.940831	NA
WBGene00000485	4.10459	0.878707	0.549344	1.59956	0.109697	0.307937
WBGene00000487	0.414311	-0.079655	2.31978	-0.0343373	0.972608	NA
WBGene00000488	0.198037	0.0170784	2.67335	0.00638837	0.994903	NA
WBGene00000490	4.10057	2.4246	0.758828	3.19518	0.00139742	0.0132674
WBGene00000491	0.943878	1.42428	1.16666	1.22082	0.222154	0.469778
WBGene00000492	1.51837	0.670608	1.05254	0.637136	0.524036	0.753032
WBGene00000493	1.09868	0.684764	1.34654	0.508536	0.611078	0.808311
WBGene00000496	16.1398	0.00285999	0.331707	0.00862204	0.993121	0.99645
WBGene00000497	1.62919	1.24832	0.901646	1.3845	0.166207	0.395544
WBGene00000498	5.32156	0.222185	0.509927	0.43572	0.66304	0.839241
WBGene00000499	19.2521	0.419655	0.305937	1.37171	0.170155	0.401258
WBGene00000500	2.10427	-0.379163	0.810413	-0.467864	0.639882	0.824664
WBGene00000501	1.00877	0.606748	1.32914	0.456497	0.648032	0.830597
WBGene00000502	3.90994	-0.818077	0.562346	-1.45476	0.145736	0.365866
WBGene00000503	4.22325	0.168087	0.59221	0.283831	0.77654	0.90163
WBGene00000506	6.25971	-1.26462	0.47281	-2.67469	0.00747977	0.0483014
WBGene00000507	1.49216	1.29493	0.932216	1.38909	0.164807	0.393529
WBGene00000508	7.72231	-0.998397	0.41766	-2.39045	0.0168277	0.0860602
WBGene00000509	1.47468	1.00172	1.03107	0.971536	0.331282	0.591275
WBGene00000510	0.421452	-0.751054	1.58896	-0.472671	0.636448	NA
WBGene00000511	0.869213	0.954796	1.27876	0.746659	0.455269	0.701025
WBGene00000512	1.22596	1.24825	1.2146	1.0277	0.30409	0.563982
WBGene00000513	0.48923	0.0986847	1.46633	0.0673004	0.946343	NA
WBGene00000514	1.50592	0.877398	0.942753	0.930677	0.352021	0.612777
WBGene00000515	0.965764	-0.478714	1.12588	-0.42519	0.670698	0.843863
WBGene00000516	1.38846	0.0676242	1.10102	0.0614194	0.951025	0.980811
WBGene00000517	2.88623	0.36116	0.670462	0.538673	0.590113	0.794753
WBGene00000518	3.43916	-0.0510885	0.589935	-0.0866002	0.930989	0.97392
WBGene00000519	4.38931	0.654948	0.522298	1.25397	0.209852	0.455415
WBGene00000520	4.94792	0.2835	0.531242	0.533655	0.593581	0.796843
WBGene00000521	0.204283	-0.469218	2.27586	-0.206172	0.836656	NA
WBGene00000522	2.54966	2.56437	0.843179	3.04131	0.00235552	0.0200637
WBGene00000523	0.217927	1.43795	2.22524	0.6462	0.51815	NA
WBGene00000524	155.652	7.47749	0.910283	8.21447	2.13099e-16	6.37838e-14
WBGene00000525	3.8596	-0.266001	0.615587	-0.432109	0.665662	0.84072
WBGene00000526	1.54171	-0.653583	0.818151	-0.798854	0.424375	0.675966
WBGene00000527	18.3437	-0.469084	0.282433	-1.66087	0.09674	0.285172
WBGene00000528	3.38236	1.5684	0.73425	2.13605	0.0326752	0.138022
WBGene00000529	1.80271	0.358299	1.10053	0.325569	0.744751	0.884463
WBGene00000530	3.22417	-0.0958877	0.609906	-0.157217	0.875074	0.949143
WBGene00000531	1.6625	1.32915	0.944403	1.40739	0.159311	0.385915
WBGene00000532	4.7668	-0.128213	0.535875	-0.239259	0.810905	0.919198
WBGene00000533	4.67419	0.00793201	0.502265	0.0157925	0.9874	0.994468
WBGene00000534	3.90759	-0.0330759	0.568673	-0.0581633	0.953619	0.981933
WBGene00000535	3.52606	-1.38644	0.686382	-2.01992	0.0433914	0.166434
WBGene00000536	2.09821	-0.0896589	0.709948	-0.126289	0.899503	0.959141
WBGene00000537	2.6343	0.212725	0.725923	0.293041	0.769491	0.897906
WBGene00000539	0.426601	-0.00559865	1.58936	-0.00352257	0.997189	NA
WBGene00000540	0.99385	0.699474	1.13363	0.61702	0.537221	0.762585
WBGene00000541	11.0037	1.56139	0.38345	4.07196	4.66183e-05	0.000852421
WBGene00000542	8.53257	0.554862	0.380532	1.45812	0.144806	0.364386
WBGene00000543	3.82573	-0.235848	0.545007	-0.432743	0.665201	0.84048
WBGene00000544	6.60916	0.664904	0.506599	1.31249	0.189356	0.429292
WBGene00000545	2.33747	0.847986	0.772251	1.09807	0.272173	0.528517
WBGene00000546	3.51706	0.977623	0.597472	1.63626	0.101784	0.294529
WBGene00000547	9.3416	0.0108599	0.42321	0.0256607	0.979528	0.992297
WBGene00000548	6.80168	0.270535	0.44653	0.605861	0.544607	0.767297
WBGene00000549	72.6958	-0.533646	0.218267	-2.44492	0.0144884	0.0777071
WBGene00000550	12.0285	0.143701	0.367489	0.391034	0.695772	0.859439
WBGene00000551	0.146056	-0.947088	2.93615	-0.322561	0.747028	NA
WBGene00000552	9.21368	0.309351	0.345365	0.895723	0.370401	0.628922
WBGene00000553	1.29761	-0.537191	1.07879	-0.497959	0.618513	0.812932
WBGene00000554	2.15929	2.17357	0.938497	2.31601	0.0205576	0.0996403
WBGene00000555	0	NA	NA	NA	NA	NA
WBGene00000556	0.0941764	-0.874686	3.11237	-0.281035	0.778683	NA
WBGene00000557	0.0521055	-0.463818	3.11654	-0.148825	0.881692	NA
WBGene00000558	0.259897	-0.792572	2.16	-0.366931	0.71367	NA
WBGene00000559	0.0990693	0.497967	3.11654	0.159782	0.873053	NA
WBGene00000560	0	NA	NA	NA	NA	NA
WBGene00000561	0.601706	0.663327	1.40188	0.47317	0.636092	NA
WBGene00000562	4.69095	1.53062	0.539015	2.83967	0.00451604	0.0330821
WBGene00000563	1.50845	2.70005	1.26401	2.13609	0.0326721	0.138022
WBGene00000564	6.58568	-0.238556	0.427295	-0.558293	0.576644	0.786818
WBGene00000565	5.84074	-0.22827	0.463733	-0.492244	0.622547	0.815703
WBGene00000566	7.84015	0.68837	0.391079	1.76018	0.0783774	0.247583
WBGene00000567	8.39683	0.548668	0.435493	1.25988	0.207714	0.453101
WBGene00000583	0.445872	1.02315	1.72079	0.594581	0.552124	NA
WBGene00000584	0.745358	2.99614	1.51166	1.98202	0.0474767	NA
WBGene00000585	2.49378	0.389892	0.765987	0.509006	0.610748	0.808125
WBGene00000591	2.81613	0.842638	0.686163	1.22804	0.219431	0.46726
WBGene00000592	5.00342	-0.184814	0.52383	-0.352813	0.724228	0.876006
WBGene00000593	0	NA	NA	NA	NA	NA
WBGene00000594	3.24366	2.10679	0.689716	3.05457	0.00225384	0.019401
WBGene00000596	0.422853	0.208603	1.61502	0.129165	0.897227	NA
WBGene00000597	10.0812	-3.17269	0.626581	-5.0635	4.11618e-07	1.51349e-05
WBGene00000598	0.218051	0.0491787	1.9937	0.024667	0.980321	NA
WBGene00000599	1.3735	2.82436	1.12359	2.5137	0.0119472	0.0676731
WBGene00000601	0.545311	0.00561099	1.56384	0.00358796	0.997137	NA
WBGene00000602	0.750441	0.321504	1.29159	0.24892	0.803422	NA
WBGene00000603	2.00047	0.0508683	0.720019	0.0706485	0.943678	0.978372
WBGene00000606	0.724227	2.04915	1.6437	1.24667	0.212519	NA
WBGene00000608	8.42201	-2.83662	0.536082	-5.29139	1.21389e-07	5.20358e-06
WBGene00000609	17.7472	-2.41683	0.455728	-5.30322	1.13777e-07	4.91432e-06
WBGene00000610	0.759738	1.26508	1.41633	0.893211	0.371744	NA
WBGene00000611	0.498987	1.75517	1.67497	1.04788	0.294693	NA
WBGene00000612	0.579166	1.1059	1.50818	0.73327	0.463394	NA
WBGene00000613	0.371213	0.418529	1.79501	0.233162	0.815635	NA
WBGene00000614	0.514772	1.22123	1.92078	0.635799	0.524908	NA
WBGene00000615	0.982674	1.06114	1.04744	1.01308	0.311023	0.571045
WBGene00000616	1.40273	0.432799	0.999652	0.43295	0.665051	0.840352
WBGene00000617	0.324144	0.465114	1.83654	0.253255	0.800071	NA
WBGene00000618	0.328521	-0.463458	2.0168	-0.229799	0.818248	NA
WBGene00000620	0.879418	0.753295	1.15256	0.653585	0.513379	0.746697
WBGene00000621	0.631649	1.05226	1.54513	0.681018	0.49586	NA
WBGene00000622	1.58364	1.03943	1.00472	1.03455	0.30088	0.560956
WBGene00000623	0.160704	0.0170774	2.85572	0.00598005	0.995229	NA
WBGene00000624	83.8149	0.245201	0.182926	1.34044	0.180104	0.416474
WBGene00000625	0.593797	0.473209	1.32081	0.358272	0.72014	NA
WBGene00000626	0.464253	-0.416769	1.70884	-0.243889	0.807316	NA
WBGene00000627	1.22559	2.48851	1.20646	2.06266	0.0391448	0.155567
WBGene00000628	1.31532	-0.606796	0.986929	-0.614832	0.538665	0.76343
WBGene00000629	0.108598	0.497967	3.11654	0.159782	0.873053	NA
WBGene00000630	1.54053	-0.198143	0.906386	-0.218608	0.826956	0.927045
WBGene00000631	0.4718	1.39443	1.55255	0.898154	0.369104	NA
WBGene00000632	8.95275	6.65713	3.00652	2.21423	NA	NA
WBGene00000633	1.54099	1.65303	0.947311	1.74497	0.0809897	0.253489
WBGene00000634	0.592352	-1.92573	1.69625	-1.13529	0.256254	NA
WBGene00000636	1.65771	1.4304	0.985306	1.45174	0.146575	0.367212
WBGene00000637	0.251985	0.0170794	2.48156	0.00688252	0.994509	NA
WBGene00000638	0.288335	0.511931	2.12452	0.240963	0.809584	NA
WBGene00000639	1.30695	3.29463	1.4109	2.33514	0.0195363	0.0959989
WBGene00000640	0.791478	-0.313473	1.34818	-0.232515	0.816138	NA
WBGene00000641	1.60785	2.61481	1.03461	2.52733	0.0114934	0.0658149
WBGene00000642	2.59885	3.28045	0.989211	3.31623	0.000912415	0.00958542
WBGene00000644	0.208019	0.494592	2.27247	0.217645	0.827706	NA
WBGene00000645	0.717799	2.94886	1.39849	2.1086	0.0349788	NA
WBGene00000646	0.684567	2.01956	1.44144	1.40108	0.161191	NA
WBGene00000647	4.08927	-0.34927	0.582898	-0.599195	0.549043	0.770162
WBGene00000648	0.736473	0.5625	1.19155	0.472076	0.636873	NA
WBGene00000649	0.358988	1.92488	1.99072	0.966925	0.333581	NA
WBGene00000650	3.68557	1.71471	0.735884	2.33013	0.0197992	0.0968445
WBGene00000651	0.291331	-1.52933	2.09575	-0.729729	0.465556	NA
WBGene00000652	0.885898	1.16702	1.1631	1.00337	0.315683	0.575977
WBGene00000653	2.86598	4.43461	1.04287	4.25231	2.1158e-05	0.000444006
WBGene00000654	0.288662	-1.06395	2.47027	-0.430702	0.666685	NA
WBGene00000655	0.523114	0.358628	1.55044	0.231307	0.817076	NA
WBGene00000656	9.5041	-3.19048	0.594377	-5.36777	7.97173e-08	3.59803e-06
WBGene00000657	0.950641	2.26475	1.32922	1.70382	0.0884144	0.268729
WBGene00000658	0.357344	-1.05445	1.80747	-0.583382	0.559636	NA
WBGene00000659	0.462923	-2.3991	1.89499	-1.26602	0.205507	NA
WBGene00000660	0.29645	-0.499778	2.07692	-0.240634	0.809838	NA
WBGene00000661	15.4002	0.959428	0.401517	2.38951	0.0168709	0.086152
WBGene00000662	1.23599	-0.199483	0.980192	-0.203514	0.838733	0.932406
WBGene00000663	0.823443	-0.280625	1.24721	-0.225002	0.821978	NA
WBGene00000664	4.86316	0.805838	0.507041	1.5893	0.111993	0.311679
WBGene00000665	24.2193	-0.756509	0.303767	-2.49042	0.0127591	0.0709135
WBGene00000666	0.291068	1.52872	2.09082	0.731155	0.464684	NA
WBGene00000667	2.67419	-1.13258	0.924159	-1.22553	0.220376	0.468341
WBGene00000668	7.32321	-3.54365	0.712931	-4.97054	6.67668e-07	2.32471e-05
WBGene00000669	3.00368	-1.58406	0.739612	-2.14174	0.0322141	0.136649
WBGene00000670	8.30106	-2.92603	0.551971	-5.30107	1.15129e-07	4.96012e-06
WBGene00000671	0.604934	1.77043	1.40369	1.26127	0.207211	NA
WBGene00000672	1.14541	-0.237016	1.15612	-0.20501	0.837565	0.931835
WBGene00000673	4.71121	-1.36218	0.527086	-2.58436	0.00975612	0.0588367
WBGene00000674	1.85582	2.02596	0.959887	2.11062	0.0348048	0.143953
WBGene00000675	21.8352	-2.1568	0.392281	-5.4981	3.83903e-08	1.99688e-06
WBGene00000676	1.12782	1.16849	1.02549	1.13945	0.254517	0.508587
WBGene00000677	5.31017	-0.00948235	0.500582	-0.0189427	0.984887	0.993935
WBGene00000678	0.642285	2.82983	1.31472	2.15242	0.0313645	NA
WBGene00000679	1.24874	1.91341	1.26636	1.51095	0.130801	0.342584
WBGene00000680	17.2494	-3.00691	0.403307	-7.45564	8.94323e-14	1.73387e-11
WBGene00000681	3.94333	0.675886	0.58197	1.16137	0.24549	0.497837
WBGene00000682	0.983174	-0.310159	1.00025	-0.310083	0.756498	0.890881
WBGene00000683	0.986441	1.38607	1.07149	1.29359	0.195806	0.437913
WBGene00000684	0.616511	2.04204	1.6906	1.20788	0.227094	NA
WBGene00000685	10.9964	-0.582258	0.361312	-1.61151	0.107068	0.30374
WBGene00000687	0.872844	1.24589	1.15144	1.08203	0.279241	0.536374
WBGene00000688	0.499872	2.38768	1.66929	1.43035	0.152616	NA
WBGene00000689	0.674443	-0.615631	1.3408	-0.459153	0.646124	NA
WBGene00000690	0.572718	1.81679	1.59634	1.1381	0.255079	NA
WBGene00000691	0.312338	-0.0293446	2.09379	-0.0140151	0.988818	NA
WBGene00000692	0.880535	1.30485	1.13526	1.14938	0.250401	0.503903
WBGene00000693	33.4932	-2.36249	0.334941	-7.05345	1.74534e-12	2.61203e-10
WBGene00000694	3.76754	0.321567	0.540791	0.594623	0.552095	0.7722
WBGene00000695	1.68835	1.47606	0.898468	1.64286	0.100412	0.292092
WBGene00000696	28.5177	-2.91181	0.380011	-7.66243	1.82442e-14	4.09557e-12
WBGene00000697	5.84473	-1.56689	0.494546	-3.16835	0.00153306	0.0142791
WBGene00000698	8.65974	-1.86879	0.461779	-4.04693	5.18935e-05	0.000933079
WBGene00000699	3.14135	0.896454	0.636557	1.40828	0.159047	0.385714
WBGene00000700	1.00482	-0.461292	1.12914	-0.408535	0.682881	0.850964
WBGene00000701	0.71897	0.498238	1.23149	0.404582	0.685785	NA
WBGene00000702	1.04	-0.744682	1.21381	-0.61351	0.539539	0.764033
WBGene00000703	2.14477	0.828482	1.00026	0.82827	0.407518	0.661573
WBGene00000704	0.681121	1.62742	1.49865	1.08592	0.277513	NA
WBGene00000705	0.343825	1.72865	2.05253	0.842205	0.399673	NA
WBGene00000706	3.14231	0.235023	0.670521	0.350509	0.725957	0.876357
WBGene00000707	0.697655	1.08624	1.40495	0.773151	0.439433	NA
WBGene00000708	2.27331	1.30479	0.832304	1.56768	0.116955	0.319925
WBGene00000709	0.687184	2.95307	1.26982	2.32558	0.020041	NA
WBGene00000710	1.04296	0.232844	1.23042	0.189239	0.849906	0.938041
WBGene00000711	0.438208	2.34226	1.49158	1.57032	0.11634	NA
WBGene00000712	1.57268	0.890336	0.949433	0.937755	0.34837	0.60947
WBGene00000713	29.3436	-2.78144	0.398999	-6.97104	3.14596e-12	4.51036e-10
WBGene00000714	0.551074	0.91921	1.53983	0.596955	0.550537	NA
WBGene00000715	2.34347	-0.57478	0.829992	-0.692513	0.488615	0.727577
WBGene00000716	15.7437	-3.79925	0.546233	-6.95537	3.51634e-12	4.9174e-10
WBGene00000717	1.74109	0.942238	1.01901	0.924658	0.355144	0.615582
WBGene00000718	0.708134	1.59089	1.31538	1.20945	0.22649	NA
WBGene00000719	1.25766	-1.58468	1.09412	-1.44837	0.147515	0.368646
WBGene00000720	0.603553	1.31286	1.38477	0.948068	0.343095	NA
WBGene00000721	0.650503	2.15027	1.76185	1.22046	0.22229	NA
WBGene00000722	0.357551	-1.23783	1.76724	-0.700429	0.483659	NA
WBGene00000723	1.24032	0.946731	1.11302	0.8506	0.394992	0.649576
WBGene00000724	343.913	9.84367	0.959644	10.2576	1.09362e-24	6.21943e-22
WBGene00000725	3.34736	5.18451	1.04107	4.97997	6.35953e-07	2.22336e-05
WBGene00000726	0.207792	-0.432731	2.26696	-0.190886	0.848615	NA
WBGene00000727	1.09704	0.283614	1.09409	0.259224	0.795462	0.911871
WBGene00000728	0.665101	1.68143	1.45	1.15961	0.246209	NA
WBGene00000729	0.16095	0.996603	2.85257	0.349371	0.726811	NA
WBGene00000730	1.09429	0.189655	0.995147	0.19058	0.848854	0.938003
WBGene00000731	1.17546	0.107665	1.26528	0.085092	0.932188	0.97414
WBGene00000732	3.23778	-1.09263	0.643749	-1.69729	0.0896415	0.271283
WBGene00000733	9.04312	-3.01241	0.626245	-4.81027	1.50723e-06	4.77972e-05
WBGene00000734	0.0569772	0.497967	3.11654	0.159782	0.873053	NA
WBGene00000735	1.0635	-1.52545	1.16295	-1.31171	0.189619	0.429683
WBGene00000736	2.47908	3.727	1.00772	3.69843	0.000216937	0.00304371
WBGene00000737	0.260776	0.51221	2.16218	0.236895	0.812738	NA
WBGene00000738	4.20376	2.57327	0.697723	3.68809	0.000225943	0.00315194
WBGene00000739	1.74026	0.322426	0.915145	0.352322	0.724597	0.8761
WBGene00000740	1.4968	0.648399	0.932637	0.695232	0.48691	0.726151
WBGene00000741	1.34589	1.49008	0.955976	1.5587	0.119067	0.323377
WBGene00000742	1.08966	0.863702	1.0334	0.83579	0.403273	0.657201
WBGene00000743	0.79764	2.09134	1.19339	1.75243	0.0797002	NA
WBGene00000744	2.70588	3.76495	1.09743	3.43071	0.000601998	0.00691164
WBGene00000745	1.09582	1.25702	1.26839	0.991037	0.321667	0.581628
WBGene00000746	0.878896	1.88665	1.35285	1.39458	0.163144	0.391584
WBGene00000747	0.258986	-0.264918	2.23613	-0.118472	0.905694	NA
WBGene00000748	0.424493	1.23949	2.00917	0.616913	0.537292	NA
WBGene00000749	0.695269	1.14999	1.53434	0.749498	0.453557	NA
WBGene00000750	0.107947	0.0170758	3.11654	0.00547908	0.995628	NA
WBGene00000751	18.8332	-2.9484	0.386328	-7.63187	2.3138e-14	5.06098e-12
WBGene00000752	9.95669	-3.25866	0.595382	-5.47322	4.41925e-08	2.2241e-06
WBGene00000753	0.62969	0.252083	1.67846	0.150187	0.880617	NA
WBGene00000754	30.3325	-2.76048	0.341909	-8.07373	6.81809e-16	1.90694e-13
WBGene00000755	0.263633	0.0420924	1.90833	0.0220572	0.982402	NA
WBGene00000756	0.509411	1.16902	1.73461	0.67394	0.50035	NA
WBGene00000757	11.8296	-2.74772	0.483941	-5.67781	1.36427e-08	8.25828e-07
WBGene00000758	1.96883	2.16918	1.00099	2.16703	0.0302328	0.130619
WBGene00000759	11.2788	1.13182	0.370124	3.05794	0.00222864	0.0192229
WBGene00000760	0.143387	-0.463818	3.11654	-0.148825	0.881692	NA
WBGene00000761	1.71582	0.863857	0.925806	0.933086	0.350776	0.611576
WBGene00000762	4.77663	-1.08829	0.542777	-2.00504	0.0449589	0.170758
WBGene00000763	3.65586	-0.763537	0.575026	-1.32783	0.184234	0.422559
WBGene00000764	3.80027	-0.210366	0.617509	-0.340669	0.733353	0.880098
WBGene00000765	2.97643	-0.589603	0.665136	-0.886439	0.375381	0.633344
WBGene00000766	1.60056	0.406205	0.939987	0.432139	0.66564	0.84072
WBGene00000767	2.75112	-0.534114	0.630571	-0.847032	0.396977	0.6515
WBGene00000768	1.33834	0.0412726	1.05991	0.0389399	0.968938	0.988501
WBGene00000770	1.43035	0.04658	0.867847	0.0536731	0.957196	0.9836
WBGene00000771	1.99535	0.815589	1.04742	0.778666	0.436176	0.685546
WBGene00000772	7.39477	0.144193	0.421875	0.34179	0.732509	0.879722
WBGene00000773	6.48764	0.0673428	0.469768	0.143353	0.886011	0.954547
WBGene00000774	3.52525	-0.173803	0.568023	-0.305979	0.759621	0.89237
WBGene00000775	0.201117	0.0170784	2.66187	0.00641597	0.994881	NA
WBGene00000776	33.4141	-0.671985	0.306549	-2.1921	0.0283726	0.125017
WBGene00000777	5.62334	-0.103402	0.441849	-0.234022	0.814968	0.921459
WBGene00000778	0.507753	1.40867	1.54132	0.913942	0.360748	NA
WBGene00000779	5.36896	-0.211389	0.460683	-0.458859	0.646335	0.829607
WBGene00000780	4.4082	1.53266	0.644677	2.37741	0.0174348	0.0882406
WBGene00000781	6.80113	-1.53694	0.613712	-2.50434	0.0122681	0.0688736
WBGene00000782	0.457811	1.54243	1.59172	0.969034	0.332528	NA
WBGene00000783	10.4428	5.49149	0.816035	6.72947	1.70277e-11	2.06035e-09
WBGene00000784	9.05026	0.770105	0.443808	1.73522	0.0827016	0.257289
WBGene00000785	4.48324	-0.999229	0.627595	-1.59216	0.111349	0.31046
WBGene00000786	21.4511	-0.558673	0.255602	-2.18571	0.0288366	0.126636
WBGene00000787	3.44689	0.410535	0.563116	0.729042	0.465976	0.70957
WBGene00000788	12.4378	-0.0986384	0.352836	-0.279558	0.779816	0.903405
WBGene00000789	1.86967	0.990112	0.791994	1.25015	0.211244	0.457017
WBGene00000792	4.37054	0.920472	0.60642	1.51788	0.129045	0.339654
WBGene00000793	2.34749	1.49884	0.742458	2.01876	0.0435124	0.166729
WBGene00000794	5.28837	-0.244447	0.539963	-0.45271	0.650757	0.831759
WBGene00000795	15.7487	1.19526	0.332581	3.59388	0.000325786	0.0042306
WBGene00000796	5.30978	-0.435767	0.487594	-0.893709	0.371477	0.629983
WBGene00000797	0.510713	-0.940538	1.72608	-0.544898	0.585824	NA
WBGene00000798	2.45076	0.11867	0.78554	0.151067	0.879923	0.951655
WBGene00000799	0.440757	2.34317	1.86866	1.25393	0.209867	NA
WBGene00000800	38.7093	0.185471	0.292539	0.634004	0.526078	0.754331
WBGene00000801	7.81891	-0.409812	0.399455	-1.02593	0.304925	0.56511
WBGene00000802	30.8709	0.469428	0.31408	1.49462	0.135015	0.349013
WBGene00000803	2.07021	0.240981	0.770175	0.312891	0.754364	0.889748
WBGene00000804	7.69651	-0.181034	0.385233	-0.469933	0.638403	0.823861
WBGene00000812	5.00604	0.643127	0.545214	1.17959	0.238165	0.489394
WBGene00000813	6.17615	0.279856	0.497197	0.562867	0.573525	0.785146
WBGene00000814	2.71613	-0.0478162	0.67658	-0.0706734	0.943658	0.978372
WBGene00000815	3.15457	0.00799358	0.648417	0.0123278	0.990164	0.995614
WBGene00000816	2.23279	0.564482	0.755087	0.747571	0.454719	0.700746
WBGene00000817	2.33049	-0.501578	0.74444	-0.673766	0.50046	0.736783
WBGene00000818	3.47661	0.257385	0.595636	0.432119	0.665655	0.84072
WBGene00000819	2.3865	0.0380091	0.729625	0.052094	0.958454	0.984241
WBGene00000820	2.54778	1.4656	0.814916	1.79847	0.0721022	0.234938
WBGene00000821	0.368742	0.589075	1.6496	0.357102	0.721015	NA
WBGene00000822	3.9315	-0.495747	0.603748	-0.821115	0.411581	0.664774
WBGene00000829	2010.76	-0.429873	0.229891	-1.8699	0.0614977	0.211577
WBGene00000830	2.94488	0.946165	0.647765	1.46066	0.144109	0.363059
WBGene00000831	5.21713	1.06321	0.515444	2.06271	0.0391401	0.155567
WBGene00000832	2.52788	1.75955	0.750763	2.34368	0.0190945	0.0942896
WBGene00000833	14.5554	-0.459273	0.31691	-1.44922	0.147276	0.36821
WBGene00000834	5.60512	-0.138	0.48543	-0.284284	0.776193	0.901556
WBGene00000835	1.23683	0.239981	1.03468	0.231938	0.816586	0.921781
WBGene00000836	9.00603	0.141016	0.413406	0.341107	0.733023	0.879968
WBGene00000837	10.9071	-0.0361716	0.352043	-0.102748	0.918163	0.967536
WBGene00000838	8.1052	0.15607	0.41612	0.375059	0.707616	0.866801
WBGene00000839	3.29449	0.199012	0.575436	0.345845	0.729459	0.878463
WBGene00000840	4.90499	0.533807	0.497156	1.07372	0.282948	0.540639
WBGene00000841	1.04438	1.91713	1.19344	1.60639	0.108188	0.305464
WBGene00000843	11.6258	-0.747849	0.382036	-1.95754	0.0502844	0.184654
WBGene00000845	0.523546	0.131979	1.55545	0.0848494	0.932381	NA
WBGene00000846	2.74963	0.749205	0.711038	1.05368	0.292031	0.550529
WBGene00000851	0.358059	1.25681	1.76488	0.71212	0.47639	NA
WBGene00000853	0.957277	2.78966	1.2818	2.17636	0.0295287	0.128606
WBGene00000854	4.1279	0.308211	0.515464	0.597929	0.549887	0.770438
WBGene00000857	0.966522	1.88145	1.11579	1.68621	0.091756	0.275704
WBGene00000858	1.58842	0.566725	0.856384	0.661765	0.508122	0.743382
WBGene00000859	0.0990693	0.497967	3.11654	0.159782	0.873053	NA
WBGene00000860	0.542308	1.26625	1.52735	0.829047	0.407078	NA
WBGene00000861	0.913486	2.07102	1.49438	1.38587	0.165786	0.395091
WBGene00000862	1.2632	-0.350688	1.04198	-0.33656	0.736449	0.881111
WBGene00000863	7.65094	0.371503	0.394811	0.940965	0.346723	0.607834
WBGene00000864	0.57333	2.68222	1.79218	1.49662	0.134491	NA
WBGene00000865	9.88475	-0.276055	0.361634	-0.763355	0.445252	0.6931
WBGene00000866	5.08044	-0.122547	0.467444	-0.262164	0.793195	0.910071
WBGene00000867	5.14781	-1.05945	0.516015	-2.05314	0.040059	0.157974
WBGene00000868	23.289	-0.355168	0.241159	-1.47276	0.140817	0.358205
WBGene00000869	6.31742	-0.798098	0.456035	-1.75008	0.0801046	0.251595
WBGene00000870	1.70764	-0.971216	0.945779	-1.0269	0.304469	0.564503
WBGene00000871	7.88128	0.270423	0.425265	0.635892	0.524847	0.75365
WBGene00000872	9.74371	-0.126707	0.417811	-0.303264	0.761689	0.893274
WBGene00000874	6.93349	0.1113	0.465657	0.239018	0.811092	0.919349
WBGene00000875	12.5763	-0.676366	0.353328	-1.91427	0.0555856	0.197038
WBGene00000876	2.93327	1.38272	0.666874	2.07343	0.0381319	0.152787
WBGene00000877	3.10016	-0.2273	0.578839	-0.392683	0.694554	0.858654
WBGene00000878	2.0532	1.29509	1.00414	1.28975	0.197138	0.439734
WBGene00000879	9.61304	-0.556075	0.433423	-1.28298	0.199498	0.443412
WBGene00000880	4.00613	1.06478	0.661841	1.60881	0.107657	0.304599
WBGene00000881	18.3859	-0.460072	0.308316	-1.49221	0.135644	0.350161
WBGene00000882	1.38929	0.776787	0.990708	0.784073	0.432998	0.683446
WBGene00000883	18.8465	-0.308151	0.311259	-0.990015	0.322167	0.58207
WBGene00000884	2.29964	1.49262	0.77096	1.93605	0.0528616	0.190571
WBGene00000885	2.66355	0.0935099	0.645179	0.144936	0.884761	0.954019
WBGene00000886	0.99009	0.189827	1.10229	0.17221	0.863272	0.944304
WBGene00000887	2.2505	-0.553074	0.734938	-0.752545	0.451723	0.698641
WBGene00000888	1.2741	0.237523	1.02009	0.232845	0.815882	0.921777
WBGene00000889	4.31267	0.0838281	0.676261	0.123958	0.901348	0.9595
WBGene00000890	1.52771	1.57718	1.05454	1.49561	0.134754	0.348815
WBGene00000891	12.4123	0.470206	0.378668	1.24174	0.214334	0.460896
WBGene00000892	2.35764	0.715216	0.733896	0.974546	0.329785	0.589525
WBGene00000893	1.73443	0.694374	0.953908	0.727926	0.466659	0.710103
WBGene00000894	9.41627	-0.200355	0.369038	-0.542912	0.58719	0.79312
WBGene00000895	120.806	0.324321	0.159286	2.03609	0.0417412	0.162442
WBGene00000896	2.09304	-0.115714	0.76815	-0.15064	0.880259	0.951948
WBGene00000897	3.83254	-0.116825	0.614584	-0.190087	0.849241	0.938003
WBGene00000898	10.8406	0.803402	0.453456	1.77173	0.0764392	0.244128
WBGene00000899	3.11792	0.552677	0.641916	0.860981	0.389249	0.64529
WBGene00000900	2.94317	1.12961	0.723779	1.56071	0.118592	0.322593
WBGene00000901	2.4362	1.03082	0.727073	1.41776	0.15626	0.381067
WBGene00000902	1.50385	1.45542	1.09921	1.32406	0.185484	0.42393
WBGene00000903	75.2185	0.324296	0.179995	1.80169	0.0715937	0.233996
WBGene00000904	1.00433	1.70516	1.14196	1.49319	0.135387	0.349763
WBGene00000905	0.438486	0.21211	1.60879	0.131844	0.895107	NA
WBGene00000906	1.86618	0.444757	0.856262	0.519417	0.60347	0.803008
WBGene00000907	1.6972	1.09061	0.83941	1.29926	0.193856	0.435295
WBGene00000908	1.79659	0.877872	0.866081	1.01362	0.310766	0.570966
WBGene00000910	0.525102	1.05003	1.41376	0.742719	0.457652	NA
WBGene00000911	6.89964	-0.141161	0.414373	-0.340662	0.733358	0.880098
WBGene00000912	6.71552	0.290182	0.44387	0.653755	0.513269	0.746644
WBGene00000913	16.2333	-0.0556281	0.330141	-0.168498	0.866192	0.944951
WBGene00000914	1.21841	2.1738	1.05365	2.06311	0.0391024	0.155471
WBGene00000915	87.2989	-0.380585	0.198094	-1.92123	0.0547023	0.194997
WBGene00000917	193.995	-0.72634	0.198466	-3.65978	0.000252431	0.00347588
WBGene00000920	0.260264	-0.508329	2.15113	-0.236308	0.813194	NA
WBGene00000928	4.28049	2.00836	0.789181	2.54487	0.0109318	0.0636112
WBGene00000929	2.49468	-0.0319032	0.75507	-0.0422519	0.966298	0.9876
WBGene00000930	0.108598	0.497967	3.11654	0.159782	0.873053	NA
WBGene00000931	18.5255	-0.205764	0.325989	-0.631201	0.527909	0.755793
WBGene00000932	0.108598	0.497967	3.11654	0.159782	0.873053	NA
WBGene00000933	3.39682	-0.276004	0.624594	-0.441894	0.658566	0.836557
WBGene00000934	1.01874	1.54772	1.0973	1.41047	0.158401	0.384585
WBGene00000935	4.4408	0.437156	0.532029	0.821678	0.41126	0.664694
WBGene00000936	1.03399	-0.409823	1.22179	-0.33543	0.737301	0.881111
WBGene00000937	2.32264	-0.254112	0.770818	-0.329665	0.741653	0.882304
WBGene00000938	3.12559	0.603845	0.648292	0.93144	0.351626	0.61251
WBGene00000939	10.6502	-0.427634	0.345373	-1.23818	0.215648	0.462673
WBGene00000940	1.48418	-0.363804	0.872802	-0.416823	0.676808	0.847718
WBGene00000941	1.22701	1.54606	0.992849	1.5572	0.119424	0.323977
WBGene00000942	4.62797	0.427333	0.609535	0.701081	0.483252	0.723453
WBGene00000950	7.65555	2.18004	0.51421	4.23959	2.23926e-05	0.000464769
WBGene00000951	0.920807	0.491585	1.43296	0.343056	0.731557	0.879136
WBGene00000952	0.721659	2.38384	1.24864	1.90914	0.0562434	NA
WBGene00000953	0.217548	0.49462	2.24485	0.220335	0.82561	NA
WBGene00000955	1.65734	2.3552	1.33489	1.76434	0.0776744	0.246366
WBGene00000958	1.48853	0.591096	0.876684	0.674241	0.500158	0.736637
WBGene00000959	2.25207	0.719769	0.747377	0.963059	0.335518	0.595547
WBGene00000960	0.282315	0.512019	2.13616	0.239691	0.81057	NA
WBGene00000961	2.97465	0.700578	0.687456	1.01909	0.308161	0.568139
WBGene00000962	51.8728	0.175708	0.235417	0.746369	0.455444	0.701165
WBGene00000963	0.941939	-0.369545	1.0292	-0.359062	0.719549	0.873687
WBGene00000964	0.852879	0.280834	1.07925	0.260213	0.7947	NA
WBGene00000965	2.12883	0.165745	0.708631	0.233895	0.815066	0.921459
WBGene00000966	0.672408	0.174999	1.37783	0.12701	0.898932	NA
WBGene00000967	3.07223	0.434925	0.606155	0.717516	0.473056	0.714016
WBGene00000968	0.502479	-0.869677	1.46549	-0.593437	0.552889	NA
WBGene00000969	1.42356	-0.373311	0.941418	-0.396541	0.691706	0.856501
WBGene00000970	5.97325	0.261494	0.45613	0.573287	0.56645	0.782006
WBGene00000971	0.152076	-0.999596	2.90098	-0.344572	0.730416	NA
WBGene00000972	0.410683	1.3977	1.59652	0.875469	0.381319	NA
WBGene00000973	3.64389	1.55181	0.628613	2.46863	0.013563	0.0739294
WBGene00000974	2.91791	0.299665	0.684353	0.437882	0.661472	0.838317
WBGene00000975	3.92232	0.0841715	0.618371	0.136118	0.891728	0.956444
WBGene00000976	7.25476	-0.485723	0.433529	-1.12039	0.262546	0.518138
WBGene00000977	0.926668	0.846199	1.48107	0.571342	0.567768	0.782048
WBGene00000978	0.526398	0.639152	1.74568	0.366134	0.714265	NA
WBGene00000979	0.498635	2.36336	1.66621	1.41841	0.156072	NA
WBGene00000980	1.37222	-0.508702	1.05753	-0.481027	0.630497	0.820324
WBGene00000981	1.38611	-0.15797	1.10683	-0.142723	0.886509	0.954762
WBGene00000982	26.6851	1.09458	0.26114	4.19155	2.77052e-05	0.000553488
WBGene00000983	0.533833	1.89525	1.70573	1.11111	0.26652	NA
WBGene00000984	1.99848	1.12196	0.783172	1.43259	0.151975	0.375557
WBGene00000985	7.94995	-0.661065	0.456848	-1.44701	0.147893	0.369106
WBGene00000986	0.146158	0.0170768	2.94372	0.0058011	0.995371	NA
WBGene00000987	3.27443	-0.341927	0.667965	-0.511894	0.608725	0.806068
WBGene00000988	3.36445	-0.496017	0.58239	-0.851693	0.394385	0.649231
WBGene00000989	0.244104	0.49469	2.17909	0.227017	0.820411	NA
WBGene00000990	0.743588	-0.242393	1.22952	-0.197145	0.843714	NA
WBGene00000991	5.3681	1.14324	0.58604	1.95079	0.0510817	0.186516
WBGene00000992	3.49117	1.65534	0.669081	2.47405	0.0133591	0.0731447
WBGene00000993	0.668924	-0.743105	1.34535	-0.552349	0.580709	NA
WBGene00000994	1.65668	-0.493205	0.905453	-0.544705	0.585956	0.792406
WBGene00000995	3.94039	0.366989	0.57669	0.636372	0.524534	0.753438
WBGene00000996	2.69138	0.177703	0.709374	0.250507	0.802196	0.915163
WBGene00000998	29.2697	0.843778	0.297883	2.83258	0.00461737	0.0336222
WBGene00001000	3.59183	-0.0612042	0.579734	-0.105573	0.915921	0.966331
WBGene00001001	4.72017	-0.338857	0.612363	-0.55336	0.580017	0.788375
WBGene00001002	4.8897	-0.172683	0.526305	-0.328104	0.742833	0.8828
WBGene00001005	7.99427	0.282175	0.428043	0.659221	0.509754	0.743962
WBGene00001006	6.56935	1.12006	0.446008	2.51131	0.0120284	0.0679974
WBGene00001007	8.05239	-0.400128	0.382199	-1.04691	0.295141	0.554133
WBGene00001008	4.72315	1.45913	0.616203	2.36793	0.0178878	0.0900534
WBGene00001016	7.248	-0.542899	0.431727	-1.2575	0.208571	0.454171
WBGene00001017	57.6236	0.232704	0.195037	1.19313	0.23282	0.482124
WBGene00001018	3.98044	-0.170096	0.550677	-0.308885	0.757409	0.891368
WBGene00001019	2.80307	0.0324321	0.626219	0.0517903	0.958696	0.984312
WBGene00001020	3.14806	-0.0589163	0.607615	-0.0969632	0.922756	0.969726
WBGene00001021	0.352841	-0.558427	2.03256	-0.274741	0.783515	NA
WBGene00001022	1.03644	1.48022	1.19768	1.2359	0.216495	0.463731
WBGene00001023	11.6867	0.205815	0.362851	0.567217	0.570567	0.783015
WBGene00001025	1.85498	0.0524178	0.753413	0.0695739	0.944533	0.978659
WBGene00001026	3.11975	1.42053	0.628484	2.26025	0.023806	0.110669
WBGene00001027	2.39545	-0.878017	0.797543	-1.1009	0.270939	0.52726
WBGene00001028	2.91597	-0.626376	0.640964	-0.977241	0.32845	0.588325
WBGene00001029	4.36362	-0.644497	0.544024	-1.18469	0.236142	0.487041
WBGene00001030	32.1415	-0.513615	0.245773	-2.08979	0.0366364	0.148751
WBGene00001031	10.2557	-0.196903	0.378823	-0.519776	0.603219	0.802908
WBGene00001032	1.40801	0.932563	0.940804	0.99124	0.321568	0.581628
WBGene00001033	1.78066	0.893067	0.900139	0.992144	0.321127	0.581485
WBGene00001034	1.11984	0.677741	1.08744	0.623244	0.533124	0.759555
WBGene00001035	3.38712	1.04355	0.643159	1.62254	0.104688	0.299829
WBGene00001036	5.8697	-0.542676	0.430454	-1.26071	0.207415	0.45281
WBGene00001037	11.1778	-0.19794	0.383526	-0.516107	0.60578	0.804297
WBGene00001038	6.12133	1.41711	0.527025	2.68889	0.00716897	0.0467544
WBGene00001039	0.853408	-0.1235	1.24791	-0.0989657	0.921166	NA
WBGene00001040	2.09125	-0.198577	0.733924	-0.270569	0.786722	0.906889
WBGene00001041	4.92497	-0.915334	0.681249	-1.34361	0.179074	0.414937
WBGene00001042	0.748981	1.07599	1.35342	0.795017	0.426603	NA
WBGene00001043	3.60028	0.278082	0.578288	0.480871	0.630608	0.820407
WBGene00001044	0.529936	-0.268944	1.42638	-0.18855	0.850445	NA
WBGene00001045	4.27942	0.756275	0.52533	1.43962	0.149975	0.372395
WBGene00001046	12.0844	-0.71426	0.378923	-1.88497	0.0594334	0.206288
WBGene00001047	7.47687	-0.168324	0.408987	-0.411564	0.680659	0.849753
WBGene00001048	2.57587	1.41309	0.721492	1.95856	0.0501645	0.184293
WBGene00001049	9.83727	1.77881	0.551723	3.22411	0.00126366	0.0122426
WBGene00001050	3.93296	1.42206	0.623563	2.28054	0.0225757	0.106487
WBGene00001051	2.56201	-1.0119	0.720899	-1.40366	0.16042	0.387447
WBGene00001052	2.38238	1.21574	0.870706	1.39627	0.162632	0.390577
WBGene00001053	0.928581	0.972867	1.15219	0.844361	0.398468	0.652353
WBGene00001054	0.754277	0.131205	1.3213	0.0993005	0.9209	NA
WBGene00001055	1.65444	0.557169	0.9085	0.613284	0.539688	0.764052
WBGene00001056	6.28415	0.0339625	0.438014	0.0775373	0.938196	0.976406
WBGene00001057	4.98047	-0.962623	0.527708	-1.82416	0.0681278	0.22631
WBGene00001058	9.63325	-0.179982	0.415026	-0.433664	0.664532	0.839943
WBGene00001059	0.548727	-1.25614	1.48816	-0.844088	0.39862	NA
WBGene00001060	3.04768	-0.303153	0.621406	-0.48785	0.625656	0.817266
WBGene00001061	2.67431	0.577155	0.71684	0.805138	0.42074	0.673319
WBGene00001062	0	NA	NA	NA	NA	NA
WBGene00001063	4.17765	2.52544	0.836443	3.01926	0.00253391	0.0211709
WBGene00001064	1.09481	0.514677	1.03109	0.499156	0.617669	0.812557
WBGene00001065	1.51643	1.47742	0.960119	1.53879	0.123856	0.331052
WBGene00001066	0.497706	-1.42064	2.29174	-0.619896	0.535326	NA
WBGene00001067	1.23512	1.94211	1.15644	1.67938	0.0930775	0.277962
WBGene00001068	2.11467	1.10553	0.927093	1.19247	0.233078	0.482532
WBGene00001069	1.52087	3.54262	1.05288	3.36471	0.000766234	0.00834287
WBGene00001070	0.106217	-0.958058	3.10943	-0.308113	0.757996	NA
WBGene00001071	0.425957	-0.171453	1.76457	-0.0971641	0.922596	NA
WBGene00001072	1.77902	1.51282	0.888589	1.7025	0.0886613	0.269214
WBGene00001073	6.14381	0.297364	0.470279	0.632314	0.527181	0.755209
WBGene00001074	1.45546	2.15241	1.3287	1.61994	0.105245	0.300625
WBGene00001075	9.55433	2.249	0.506587	4.43951	9.0162e-06	0.000213646
WBGene00001076	10.3497	2.14806	0.694066	3.09488	0.0019689	0.0174049
WBGene00001077	2.28368	1.21257	0.763892	1.58736	0.112431	0.312493
WBGene00001078	0.487951	0.72082	1.3441	0.536283	0.591763	NA
WBGene00001079	0.463998	0.0285136	1.46223	0.0195	0.984442	NA
WBGene00001080	9.84639	0.468318	0.382075	1.22572	0.220303	0.468283
WBGene00001081	14.4926	1.20478	0.369343	3.26195	0.0011065	0.0111374
WBGene00001082	3.94996	0.511569	0.626201	0.81694	0.413963	0.666852
WBGene00001085	10.3714	-0.170871	0.342691	-0.498614	0.618051	0.812869
WBGene00001086	6.4098	0.109995	0.442293	0.248692	0.803599	0.916079
WBGene00001087	5.94381	0.235638	0.491466	0.47946	0.631612	0.82083
WBGene00001088	1.90868	-0.324224	0.866298	-0.374264	0.708208	0.867203
WBGene00001089	2.9755	1.88859	0.750723	2.5157	0.0118796	0.0674018
WBGene00001090	5.3222	0.271035	0.487393	0.556092	0.578148	0.787483
WBGene00001091	3.38589	1.44209	0.650268	2.21768	0.0265767	0.119542
WBGene00001092	1.98059	-0.358323	0.75438	-0.47499	0.634794	0.822338
WBGene00001093	7.84127	-0.120782	0.418436	-0.288652	0.772848	0.9001
WBGene00001094	8.16365	1.26108	0.437983	2.87928	0.00398579	0.0301158
WBGene00001095	1.29211	-0.559454	1.00945	-0.554217	0.57943	0.788142
WBGene00001096	0.371385	1.76954	2.34497	0.754613	0.450481	NA
WBGene00001099	27.9308	1.11054	0.233122	4.76378	1.90003e-06	5.85134e-05
WBGene00001101	3.98848	0.943701	0.632531	1.49194	0.135714	0.350238
WBGene00001102	6.25511	-0.827085	0.487428	-1.69684	0.0897275	0.271377
WBGene00001103	2.81116	0.438222	0.663212	0.660757	0.508768	0.743584
WBGene00001104	3.57045	0.189392	0.553117	0.342409	0.732043	0.879287
WBGene00001105	1.05748	1.77243	1.3824	1.28214	0.199794	0.443568
WBGene00001106	1.05545	-0.0253531	1.06427	-0.0238221	0.980995	0.992984
WBGene00001107	1.28077	0.527068	0.946564	0.556822	0.577649	0.787036
WBGene00001108	0.331182	1.08118	2.06673	0.523132	0.600882	NA
WBGene00001109	0.20328	-0.463632	2.69045	-0.172325	0.863182	NA
WBGene00001110	11.2254	0.0866297	0.339459	0.255199	0.798569	0.91308
WBGene00001111	1.47429	0.161822	0.958908	0.168757	0.865988	0.944929
WBGene00001112	4.22608	0.417934	0.530048	0.788483	0.430414	0.681576
WBGene00001113	2.2006	0.119337	0.916581	0.130198	0.89641	0.958309
WBGene00001115	128.626	-1.16161	0.201757	-5.75747	8.53853e-09	5.45603e-07
WBGene00001116	1.64764	1.43158	1.00698	1.42166	0.155125	0.379602
WBGene00001117	1.49857	-0.356385	1.00045	-0.356226	0.721672	0.874712
WBGene00001118	3.13076	0.644582	0.618208	1.04266	0.297105	0.556595
WBGene00001119	1.31837	-0.0316997	1.00018	-0.031694	0.974716	0.990869
WBGene00001121	2.87113	-1.05728	0.718567	-1.47138	0.141189	0.358829
WBGene00001122	1.517	1.81062	0.919252	1.96967	0.0488767	0.180826
WBGene00001123	0.383854	1.53531	1.56918	0.978415	0.327869	NA
WBGene00001127	0.251247	0.514473	2.54806	0.201908	0.839989	NA
WBGene00001129	0.642307	0.258349	1.28874	0.200466	0.841116	NA
WBGene00001130	2.72387	0.557006	0.654577	0.850941	0.394802	0.649576
WBGene00001131	21.9795	0.614676	0.251455	2.44448	0.0145062	0.0777295
WBGene00001132	24.28	-0.457171	0.298951	-1.52925	0.126203	0.334949
WBGene00001133	2.03123	0.998921	0.736393	1.35651	0.174938	0.408908
WBGene00001134	6.82705	-0.351248	0.486362	-0.722194	0.470175	0.712276
WBGene00001135	1.38656	0.790728	0.898418	0.880133	0.378787	0.636071
WBGene00001136	1.18957	-1.67113	1.11485	-1.49898	0.13388	0.347401
WBGene00001137	25.0994	-0.0845303	0.276097	-0.306162	0.759481	0.89237
WBGene00001145	2.36256	0.526484	0.765044	0.688175	0.491342	0.72989
WBGene00001147	0	NA	NA	NA	NA	NA
WBGene00001148	2.62627	0.63341	0.714184	0.8869	0.375133	0.633243
WBGene00001149	4.97534	0.682662	0.550799	1.2394	0.215196	0.462168
WBGene00001150	1.48466	-0.936442	0.884972	-1.05816	0.289982	0.548339
WBGene00001151	2.12662	0.33856	0.729024	0.464402	0.64236	0.82647
WBGene00001152	2.96617	-0.410387	0.643621	-0.637622	0.52372	0.752817
WBGene00001153	44.083	-0.968532	0.256421	-3.77711	0.000158657	0.0023436
WBGene00001154	1.77676	0.663633	0.809846	0.819457	0.412526	0.665479
WBGene00001155	8.3646	-1.9924	0.478865	-4.16066	3.17325e-05	0.000620147
WBGene00001156	1.40598	-0.722705	1.16517	-0.620255	0.53509	0.760764
WBGene00001157	1.09757	0.522565	1.04622	0.49948	0.617441	0.812454
WBGene00001158	0.464551	-1.07379	1.52966	-0.701982	0.48269	NA
WBGene00001159	0.640859	0.857704	1.55328	0.552189	0.580819	NA
WBGene00001160	10.1893	1.81274	0.78058	2.3223	0.0202165	0.0984217
WBGene00001161	3.44489	0.761268	0.577004	1.31935	0.187053	0.426191
WBGene00001162	1.4855	0.745353	0.959768	0.776598	0.437396	0.687084
WBGene00001163	0.378271	0.607839	1.80618	0.336533	0.736469	NA
WBGene00001164	0.10895	0.0170758	3.11654	0.00547908	0.995628	NA
WBGene00001165	1.09963	0.308394	0.962308	0.320474	0.748609	0.887316
WBGene00001166	7.80596	0.0194137	0.422037	0.046	0.96331	0.986255
WBGene00001167	146.866	0.318509	0.20038	1.58953	0.111942	0.311657
WBGene00001168	238.099	-0.398362	0.171372	-2.32454	0.0200966	0.0979512
WBGene00001169	83.6533	0.0872709	0.261083	0.334264	0.73818	0.881395
WBGene00001170	0.411299	0.185121	1.7811	0.103936	0.91722	NA
WBGene00001171	3.93673	0.753712	0.595296	1.26611	0.205473	0.450182
WBGene00001172	3.13611	1.62238	0.6872	2.36086	0.0182327	0.0912101
WBGene00001173	13.2826	0.484924	0.348951	1.38966	0.164631	0.393379
WBGene00001174	0.676478	1.19992	1.54575	0.776266	0.437592	NA
WBGene00001175	0.169827	0.494474	2.40417	0.205673	0.837046	NA
WBGene00001177	7.81028	1.57697	0.432165	3.64899	0.000263278	0.00357058
WBGene00001178	1.5538	0.739813	0.85691	0.86335	0.387945	0.644163
WBGene00001179	2.05453	1.32424	0.92724	1.42815	0.153247	0.377192
WBGene00001182	1.01237	0.180541	1.0783	0.167431	0.867031	0.945095
WBGene00001184	1.89494	1.45599	0.791907	1.83858	0.0659766	0.221711
WBGene00001185	0.112819	0.968774	3.11562	0.310941	0.755846	NA
WBGene00001186	1.75282	1.49372	0.888172	1.68179	0.0926095	0.277098
WBGene00001187	4.09131	2.24076	0.658356	3.40356	0.000665132	0.00745096
WBGene00001188	0.98907	0.802784	1.06062	0.7569	0.44911	0.696126
WBGene00001189	3.20133	1.76997	0.716672	2.46971	0.0135223	0.0737619
WBGene00001190	0.363996	-0.599036	2.05144	-0.292007	0.770281	NA
WBGene00001193	1.00043	1.06509	1.03605	1.02802	0.303938	0.563763
WBGene00001194	7.40813	0.490811	0.420171	1.16812	0.242758	0.494235
WBGene00001196	638.148	-0.278843	0.135363	-2.05997	0.0394017	0.156239
WBGene00001202	0.9364	2.21037	1.30979	1.68758	0.0914918	0.275007
WBGene00001204	0.40193	0.560455	1.63046	0.34374	0.731042	NA
WBGene00001207	0.585126	-0.300576	1.36985	-0.219422	0.826321	NA
WBGene00001208	1.81771	2.54226	0.954809	2.66259	0.00775429	0.0496793
WBGene00001209	29.4978	1.16019	0.42933	2.70233	0.00688562	0.0453821
WBGene00001210	0.933864	2.14564	1.22437	1.75245	0.0796965	0.250729
WBGene00001211	0.320275	-0.33505	2.12114	-0.157957	0.87449	NA
WBGene00001214	9.91584	-0.10818	0.408208	-0.265011	0.791001	0.908772
WBGene00001215	9.44617	0.410047	0.401607	1.02101	0.307247	0.567613
WBGene00001223	0.0990693	0.497967	3.11654	0.159782	0.873053	NA
WBGene00001224	20.6061	-0.835512	0.27129	-3.07977	0.00207162	0.0181227
WBGene00001225	9.67276	-0.457614	0.376338	-1.21596	0.223998	0.471538
WBGene00001226	18.4295	-0.277473	0.277669	-0.999292	0.317653	0.578325
WBGene00001227	8.0406	-0.322606	0.376102	-0.857762	0.391024	0.646627
WBGene00001228	5.73835	0.131146	0.468738	0.279785	0.779643	0.903282
WBGene00001229	4.2972	0.00462174	0.553989	0.00834266	0.993344	0.996525
WBGene00001230	3.85854	0.491799	0.594787	0.826849	0.408323	0.662331
WBGene00001231	4.21056	-0.441362	0.52058	-0.847827	0.396534	0.65107
WBGene00001232	5.00066	-0.177086	0.589724	-0.300285	0.763959	0.895002
WBGene00001233	2.74894	-0.248366	0.669417	-0.371019	0.710624	0.868229
WBGene00001234	3.82796	0.604447	0.524389	1.15267	0.249047	0.502184
WBGene00001235	0.975277	1.12126	1.08458	1.03382	0.301221	0.561101
WBGene00001236	1.85153	0.23238	0.814981	0.285136	0.77554	0.901085
WBGene00001237	0.518113	1.6296	1.50138	1.0854	0.277745	NA
WBGene00001239	5.08282	0.123991	0.541977	0.228776	0.819043	0.922965
WBGene00001240	1.55534	0.15123	0.86868	0.174092	0.861793	0.943665
WBGene00001241	2.36671	0.72836	0.779129	0.934838	0.349872	0.611136
WBGene00001242	0.381988	1.4177	1.99301	0.711335	0.476877	NA
WBGene00001243	5.63166	-0.626178	0.636555	-0.983699	0.325264	0.585001
WBGene00001244	3.47974	-0.183719	0.576868	-0.318477	0.750123	0.888075
WBGene00001245	0.0470882	-0.463818	3.11654	-0.148825	0.881692	NA
WBGene00001246	1.19879	2.29079	1.05249	2.17653	0.0295154	0.128591
WBGene00001247	3.49752	1.55143	0.611734	2.53613	0.0112086	0.0646921
WBGene00001248	2.30584	1.33031	0.752406	1.76807	0.077049	0.245249
WBGene00001249	0.909639	1.54919	1.12928	1.37183	0.170116	0.401258
WBGene00001250	0.979144	2.95161	1.15574	2.55388	0.0106531	0.06242
WBGene00001251	0.877709	0.119677	1.34258	0.0891394	0.928971	0.972581
WBGene00001252	1.08169	1.11802	1.09205	1.02377	0.305943	0.566234
WBGene00001253	1.37882	1.4311	0.988443	1.44783	0.147664	0.368832
WBGene00001258	10.8465	-0.10983	0.347316	-0.316225	0.751832	0.888923
WBGene00001259	16.6696	0.201171	0.32915	0.611184	0.541078	0.764879
WBGene00001262	6.50028	0.165685	0.41787	0.396499	0.691737	0.856501
WBGene00001263	17.7682	0.61584	0.388692	1.58439	0.113105	0.313668
WBGene00001281	7.60009	-0.0818795	0.38921	-0.210373	0.833376	0.930133
WBGene00001284	8.99533	0.122115	0.452836	0.269666	0.787417	0.907159
WBGene00001303	2.54183	0.659671	0.70471	0.936089	0.349228	0.610468
WBGene00001309	2.02907	0.0416703	0.874621	0.0476439	0.962	0.985628
WBGene00001310	0.0989679	-0.463818	3.11654	-0.148825	0.881692	NA
WBGene00001311	0.200364	0.0170784	2.66433	0.00641003	0.994886	NA
WBGene00001320	6.07405	-0.753981	0.441644	-1.70721	0.0877823	0.267486
WBGene00001324	4.53645	0.0391292	0.539488	0.0725303	0.94218	0.977829
WBGene00001325	1.55728	1.20711	0.88366	1.36603	0.17193	0.404034
WBGene00001328	24.1908	0.363635	0.318952	1.14009	0.254249	0.508408
WBGene00001329	6.67815	0.500704	0.478909	1.04551	0.295788	0.554797
WBGene00001330	5.38084	0.888618	0.557915	1.59275	0.111217	0.31028
WBGene00001331	3.57243	-0.249102	0.646271	-0.385445	0.699908	0.861473
WBGene00001332	4.59778	-0.231176	0.497414	-0.464755	0.642107	0.826316
WBGene00001333	15.1444	0.218615	0.316997	0.689644	0.490418	0.729194
WBGene00001334	2.61509	-0.227444	0.686107	-0.331499	0.740268	0.88215
WBGene00001335	1.9136	-0.315295	0.76768	-0.410712	0.681284	0.850178
WBGene00001336	8.23554	0.827001	0.428045	1.93204	0.0533543	0.191597
WBGene00001337	9.13599	0.734281	0.414717	1.77056	0.0766342	0.244413
WBGene00001338	7.74959	-0.154564	0.415165	-0.372295	0.709673	0.867503
WBGene00001340	5.15061	0.0757431	0.552256	0.137152	0.890911	0.956024
WBGene00001345	1.94646	0.156368	0.775138	0.20173	0.840128	0.933105
WBGene00001352	5.73346	0.458212	0.49962	0.917121	0.359079	0.619188
WBGene00001358	1.11156	-1.13783	1.06179	-1.07162	0.283891	0.541605
WBGene00001365	3.39147	0.490959	0.609683	0.80527	0.420664	0.67326
WBGene00001366	2.08944	1.6081	0.893016	1.80075	0.0717422	0.234212
WBGene00001368	0.752955	0.271454	1.22005	0.222495	0.823929	NA
WBGene00001371	4.99622	-0.171623	0.480911	-0.35687	0.721189	0.874442
WBGene00001372	5.99893	-0.0200889	0.488714	-0.0411056	0.967212	0.987795
WBGene00001373	0.117722	0.974961	3.11547	0.312942	0.754324	NA
WBGene00001374	0.397935	2.16478	1.91732	1.12907	0.258869	NA
WBGene00001377	2.84853	0.920705	0.630382	1.46055	0.144139	0.363082
WBGene00001385	7.25463	-1.06904	0.422051	-2.53296	0.0113105	0.0650382
WBGene00001386	43.5877	-1.00231	0.26149	-3.83307	0.000126555	0.00197004
WBGene00001387	0.151175	0.017077	2.91211	0.00586414	0.995321	NA
WBGene00001388	0.0521055	-0.463818	3.11654	-0.148825	0.881692	NA
WBGene00001389	0.440494	-0.0610529	1.98054	-0.0308263	0.975408	NA
WBGene00001390	3.28668	1.40235	0.629199	2.22879	0.025828	0.117202
WBGene00001391	0.452123	0.890744	1.5814	0.563264	0.573255	NA
WBGene00001392	3.00169	0.242228	0.694859	0.3486	0.727389	0.877093
WBGene00001393	6.00713	-0.401631	0.513506	-0.782135	0.434135	0.684419
WBGene00001394	13.4879	0.989991	0.356356	2.77809	0.00546789	0.0382167
WBGene00001395	2.83492	0.791896	0.659078	1.20152	0.22955	0.478186
WBGene00001396	5.71681	0.812073	0.464793	1.74717	0.0806075	0.252477
WBGene00001397	1.75191	-0.641627	0.945589	-0.678547	0.497425	0.734831
WBGene00001398	12.2487	0.848951	0.424966	1.99769	0.0457504	0.172687
WBGene00001399	0.757386	-1.93061	1.33461	-1.44657	0.148017	NA
WBGene00001400	17.835	0.144756	0.54989	0.263245	0.792362	0.909709
WBGene00001401	24.4225	-0.380463	0.260012	-1.46325	0.143399	0.36186
WBGene00001402	5.46563	-0.272567	0.598371	-0.455515	0.648739	0.830688
WBGene00001403	1.73487	1.63054	1.06962	1.52442	0.127404	0.336529
WBGene00001404	3.30091	-0.862788	0.664459	-1.29848	0.194122	0.435422
WBGene00001405	2.74596	0.274308	0.75615	0.36277	0.716777	0.871983
WBGene00001406	1.36782	0.590092	1.00651	0.586277	0.55769	0.775814
WBGene00001410	2.32875	0.46316	0.850437	0.544614	0.586019	0.792423
WBGene00001411	4.48725	0.131016	0.567446	0.230886	0.817403	0.922336
WBGene00001412	4.84671	0.441314	0.535929	0.823455	0.410249	0.663626
WBGene00001413	72.7848	-0.258947	0.203407	-1.27305	0.203	0.447346
WBGene00001414	6.39756	1.71103	0.609709	2.8063	0.00501145	0.0357443
WBGene00001423	28.4145	-1.12421	0.254617	-4.41529	1.00875e-05	0.000235758
WBGene00001424	0.448467	2.43984	1.57164	1.55241	0.120563	NA
WBGene00001425	0.991508	0.0951905	1.13776	0.0836647	0.933323	0.974283
WBGene00001426	5.59491	-0.0297104	0.47825	-0.0621231	0.950465	0.980532
WBGene00001427	10.414	-0.357366	0.354721	-1.00746	0.313715	0.573838
WBGene00001428	1.28442	0.424364	1.01594	0.417705	0.676163	0.847332
WBGene00001429	0.170963	0.501748	2.39944	0.20911	0.834362	NA
WBGene00001430	2.16852	1.24181	0.819044	1.51617	0.129476	0.340421
WBGene00001431	9.18898	-0.245774	0.461616	-0.53242	0.594435	0.797266
WBGene00001432	0.10895	0.0170758	3.11654	0.00547908	0.995628	NA
WBGene00001433	8.48947	-0.580204	0.420366	-1.38023	0.167515	0.397492
WBGene00001434	12.2755	4.60126	0.85292	5.39471	6.86327e-08	3.1993e-06
WBGene00001435	0.615534	-1.02849	1.34579	-0.76423	0.44473	NA
WBGene00001436	1.28481	1.18421	0.965371	1.22668	0.219941	0.467936
WBGene00001437	0.141265	-1.20794	3.10145	-0.389477	0.696924	NA
WBGene00001438	0.662669	2.85844	1.50847	1.89492	0.0581027	NA
WBGene00001439	3.38539	0.194538	0.610321	0.318747	0.749918	0.888075
WBGene00001440	1.75056	-0.276279	0.944637	-0.292471	0.769926	0.898308
WBGene00001441	4.51436	3.79921	0.873626	4.34878	1.36897e-05	0.000306911
WBGene00001442	15.2061	0.704465	0.319475	2.20507	0.0274492	0.122051
WBGene00001443	6.56841	0.0328371	0.438209	0.0749347	0.940267	0.976776
WBGene00001444	0.809069	2.02112	1.25073	1.61596	0.106104	NA
WBGene00001445	0.428627	-0.610499	1.99625	-0.305822	0.75974	NA
WBGene00001446	1.80936	0.413687	0.739171	0.559664	0.575709	0.786386
WBGene00001447	0.0531084	-0.463818	3.11654	-0.148825	0.881692	NA
WBGene00001448	0.400275	0.101426	1.61028	0.0629864	0.949777	NA
WBGene00001449	0.473773	0.808534	1.45682	0.554999	0.578895	NA
WBGene00001450	0.117722	0.974961	3.11547	0.312942	0.754324	NA
WBGene00001451	0.371599	-1.21141	2.35606	-0.514165	0.607137	NA
WBGene00001452	0.667608	0.89735	1.44306	0.62184	0.534047	NA
WBGene00001453	0.658059	1.56839	1.46841	1.06809	0.285479	NA
WBGene00001454	0.470393	2.3856	1.61754	1.47483	0.140257	NA
WBGene00001455	5.16711	0.162855	0.547958	0.297203	0.766311	0.896341
WBGene00001456	0.628152	-0.00232401	1.42931	-0.00162596	0.998703	NA
WBGene00001457	0.756617	0.994741	1.35107	0.736262	0.461571	NA
WBGene00001458	0.717402	0.0941011	1.18771	0.0792293	0.93685	NA
WBGene00001459	0.71224	-0.896846	1.49371	-0.600413	0.548231	NA
WBGene00001460	0.371702	2.10096	1.93735	1.08445	0.278165	NA
WBGene00001461	21.3402	-0.156198	0.256388	-0.609226	0.542375	0.765931
WBGene00001462	0.299434	0.501311	2.06171	0.243153	0.807887	NA
WBGene00001463	0.217681	0.501572	2.24424	0.223493	0.823151	NA
WBGene00001464	0.0618804	0.497967	3.11654	0.159782	0.873053	NA
WBGene00001465	0.327282	1.05329	2.06735	0.509489	0.610409	NA
WBGene00001466	0.288662	-1.06395	2.47027	-0.430702	0.666685	NA
WBGene00001468	0.865177	2.15628	1.2618	1.70889	0.087472	NA
WBGene00001470	3.06277	0.438135	0.642212	0.682227	0.495095	0.732786
WBGene00001475	5.602	2.15036	0.561196	3.83174	0.000127242	0.00197892
WBGene00001476	0.781866	1.98475	1.26809	1.56515	0.117548	NA
WBGene00001477	1.85062	-3.79075	3.02102	-1.25479	NA	NA
WBGene00001478	0.536061	0.471363	1.54034	0.306013	0.759595	NA
WBGene00001479	5.3613	2.64886	0.709503	3.7334	0.000188913	0.00272216
WBGene00001480	2.3516	0.863912	0.852654	1.0132	0.310963	0.571045
WBGene00001481	3.50829	-0.702856	0.643243	-1.09268	0.274536	0.53111
WBGene00001482	4.61402	-0.783697	0.582749	-1.34483	0.178681	0.414363
WBGene00001483	0.334421	0.0558292	1.84614	0.0302411	0.975875	NA
WBGene00001484	0.872323	2.10081	1.2761	1.64627	0.0997079	0.29064
WBGene00001485	2.91984	0.10974	0.697682	0.157292	0.875015	0.949143
WBGene00001486	0.665945	1.08196	1.34195	0.80626	0.420093	NA
WBGene00001487	0.312217	0.480368	1.85007	0.259648	0.795135	NA
WBGene00001488	32.9625	0.587449	0.23767	2.4717	0.0134471	0.0734969
WBGene00001489	2.78245	3.4657	1.08965	3.18057	0.00146987	0.0138168
WBGene00001490	1.28769	2.20522	1.07005	2.06085	0.0393172	0.156034
WBGene00001491	3.44795	1.04559	0.637573	1.63995	0.101016	0.2931
WBGene00001492	3.14594	0.831186	0.686696	1.21041	0.22612	0.473961
WBGene00001493	5.85721	1.95162	0.531489	3.67199	0.00024067	0.00332745
WBGene00001494	1.78651	1.43873	0.899452	1.59956	0.109696	0.307937
WBGene00001495	6.34631	1.75852	0.606988	2.89712	0.00376604	0.0287611
WBGene00001496	20.3331	-0.796902	0.294527	-2.7057	0.00681607	0.0451257
WBGene00001497	4.42813	-0.928308	0.537384	-1.72746	0.0840859	0.260118
WBGene00001498	6.54759	-0.574696	0.61139	-0.939984	0.347226	0.60834
WBGene00001499	2.903	1.40157	0.659335	2.12574	0.0335252	0.140637
WBGene00001500	0.434393	2.24594	2.70364	0.830711	0.406137	NA
WBGene00001501	5.16318	0.353807	0.463963	0.762575	0.445717	0.693324
WBGene00001502	9.33677	0.763087	0.378624	2.01542	0.0438605	0.167331
WBGene00001503	10.9554	-0.304693	0.352212	-0.865084	0.386992	0.643809
WBGene00001505	0.733728	1.35541	1.26809	1.06886	0.285132	NA
WBGene00001506	0.368862	-0.00651206	1.78734	-0.00364344	0.997093	NA
WBGene00001507	0.320856	1.27656	1.64452	0.776252	0.4376	NA
WBGene00001508	0.679474	2.87932	1.29584	2.22197	0.0262854	NA
WBGene00001509	5.09236	-0.876508	0.556471	-1.57512	0.115229	0.316676
WBGene00001510	6.55789	-0.225023	0.474034	-0.474699	0.635002	0.822402
WBGene00001511	5.94346	-0.556059	0.474963	-1.17074	0.241703	0.493146
WBGene00001512	1.20113	1.19333	1.12449	1.06122	0.28859	0.546646
WBGene00001513	5.08337	-0.0564425	0.490772	-0.115008	0.908439	0.963501
WBGene00001514	71.87	-0.302129	0.189448	-1.59479	0.110759	0.309535
WBGene00001515	0.691124	-0.446705	1.26827	-0.352215	0.724677	NA
WBGene00001516	3.92642	0.552572	0.54959	1.00543	0.314691	0.574834
WBGene00001517	0.264645	1.53778	2.13545	0.720117	0.471453	NA
WBGene00001518	0.939207	2.23106	1.13788	1.96072	0.0499113	0.183742
WBGene00001519	1.19939	0.558474	1.0047	0.555861	0.578306	0.787515
WBGene00001520	2.65137	0.792678	0.69689	1.13745	0.25535	0.509892
WBGene00001522	0.755474	-1.6459	1.29653	-1.26947	0.204274	NA
WBGene00001523	0.953786	1.01209	1.20295	0.841344	0.400155	0.654183
WBGene00001526	7.15691	-0.126483	0.418384	-0.302313	0.762413	0.893686
WBGene00001527	5.10931	1.15646	0.507658	2.27802	0.0227254	0.106986
WBGene00001528	4.15481	4.02543	1.09013	3.69262	0.000221952	0.00310133
WBGene00001529	5.33194	3.65672	0.890955	4.10427	4.05595e-05	0.000759589
WBGene00001530	1.43293	1.698	1.02427	1.65777	0.0973637	0.286252
WBGene00001531	1.26545	0.768711	0.915483	0.839678	0.401089	0.655019
WBGene00001532	0.893379	1.66725	1.11332	1.49754	0.134252	0.348043
WBGene00001533	1.3718	1.7951	1.11629	1.60809	0.107816	0.304846
WBGene00001534	0.617857	0.405105	1.35261	0.2995	0.764559	NA
WBGene00001535	0.711725	1.63499	1.71416	0.953813	0.340178	NA
WBGene00001536	1.68016	0.433646	0.961619	0.450954	0.652023	0.832522
WBGene00001537	7.09116	2.7432	0.652185	4.20617	2.59733e-05	0.000524415
WBGene00001538	24.7948	0.963562	0.26408	3.64875	0.000263522	0.00357105
WBGene00001539	0.660084	0.895258	1.38206	0.647769	0.517134	NA
WBGene00001540	0.47795	0.364374	1.37041	0.265886	0.790327	NA
WBGene00001541	1.58765	0.795916	0.882711	0.901672	0.367231	0.62622
WBGene00001542	1.28306	2.21452	1.09211	2.02774	0.0425867	0.164355
WBGene00001543	0.829762	0.725477	1.18455	0.612448	0.540242	NA
WBGene00001544	3.1037	1.53601	0.742883	2.06763	0.0386744	0.154309
WBGene00001545	1.64505	1.67156	0.992378	1.6844	0.0921042	0.276215
WBGene00001546	3.2861	0.520486	0.642412	0.810206	0.417822	0.671075
WBGene00001547	2.06988	0.531649	0.918752	0.578664	0.562816	0.779147
WBGene00001548	121.377	-0.354666	0.201972	-1.75602	0.0790848	0.249304
WBGene00001549	2.94177	0.326962	0.694088	0.471067	0.637593	0.823714
WBGene00001550	1.55892	2.66495	1.17478	2.26846	0.0233011	0.108825
WBGene00001551	0.706012	0.00428668	1.31372	0.00326302	0.997396	NA
WBGene00001552	0.217029	0.00858585	2.2826	0.00376144	0.996999	NA
WBGene00001553	9.33025	0.657488	0.411974	1.59595	0.110501	0.309136
WBGene00001554	2.17983	1.54673	0.816274	1.89487	0.0581096	0.203032
WBGene00001555	4.10152	-0.0212302	0.577248	-0.0367784	0.970662	0.989031
WBGene00001556	1.28813	0.670233	1.09554	0.611783	0.540681	0.764711
WBGene00001557	1.04149	1.2281	1.25024	0.982293	0.325956	0.585629
WBGene00001558	13.6429	0.075345	0.303001	0.248662	0.803622	0.916079
WBGene00001559	2.70969	2.32998	0.861455	2.7047	0.00683652	0.0451909
WBGene00001560	2.62602	1.05963	0.688278	1.53953	0.123674	0.330815
WBGene00001561	6.68101	0.412506	0.439172	0.939281	0.347586	0.608659
WBGene00001562	5.46305	0.698522	0.480837	1.45272	0.146301	0.366849
WBGene00001563	5.53824	-0.592019	0.552965	-1.07063	0.284337	0.54213
WBGene00001564	14.9056	-1.34509	0.494915	-2.71781	0.00657151	0.0437613
WBGene00001565	7.51308	-0.125061	0.481894	-0.25952	0.795234	0.911793
WBGene00001566	5.60949	0.174337	0.500688	0.348194	0.727694	0.877314
WBGene00001568	6.83673	0.248033	0.441918	0.561265	0.574617	0.785792
WBGene00001569	3.33761	0.186634	0.731224	0.255235	0.798541	0.91308
WBGene00001570	2.17084	1.07085	0.871901	1.22818	0.21938	0.46726
WBGene00001571	3.33346	0.23035	0.580028	0.397136	0.691267	0.856491
WBGene00001572	0.849903	0.883649	1.19549	0.739152	0.459815	NA
WBGene00001574	6.95896	1.09033	0.449983	2.42304	0.0153911	0.0809706
WBGene00001575	19.6121	1.40027	0.361343	3.87518	0.000106544	0.00171486
WBGene00001577	0.786862	1.5617	1.20229	1.29894	0.193964	NA
WBGene00001578	1.71394	-0.0870876	0.955015	-0.0911897	0.927342	0.97165
WBGene00001579	6.15567	1.35898	0.529427	2.56689	0.0102614	0.0609153
WBGene00001580	6.23976	0.164335	0.425772	0.38597	0.699519	0.861441
WBGene00001581	74.3942	1.7206	0.251505	6.84123	7.85166e-12	1.03843e-09
WBGene00001582	6.16915	0.356855	0.445367	0.801261	0.422981	0.67532
WBGene00001583	2.78095	0.616629	0.742392	0.830598	0.406201	0.659892
WBGene00001584	5.61947	-0.221938	0.558597	-0.397314	0.691136	0.85644
WBGene00001585	1.68159	-0.158089	0.946776	-0.166976	0.867389	0.94517
WBGene00001586	0.973983	-1.22471	1.14111	-1.07326	0.283152	0.540728
WBGene00001587	0.419455	2.17815	1.54195	1.4126	0.157775	NA
WBGene00001588	0.193135	0.982897	2.69831	0.364264	0.715661	NA
WBGene00001589	5.59217	0.46306	0.486054	0.952694	0.340745	0.601617
WBGene00001590	0.823689	-1.71572	1.44057	-1.191	0.233655	NA
WBGene00001591	0.499709	1.86977	1.65516	1.12967	0.258617	NA
WBGene00001592	0.399422	1.5596	1.71385	0.909998	0.362824	NA
WBGene00001593	0.198242	-0.731156	2.77177	-0.263786	0.791944	NA
WBGene00001594	2.3478	-0.215761	0.734187	-0.293877	0.768852	0.897662
WBGene00001595	13.1294	-0.0925538	0.358073	-0.258477	0.796039	0.912164
WBGene00001596	13.7161	1.09433	0.371346	2.94692	0.00320958	0.0253629
WBGene00001597	5.27813	-0.251936	0.451388	-0.558137	0.576751	0.786818
WBGene00001598	69.1297	-0.677812	0.197509	-3.43181	0.000599571	0.00690235
WBGene00001599	21.3765	-0.371275	0.269374	-1.37829	0.168114	0.398526
WBGene00001600	3.50612	0.00902135	0.617695	0.0146049	0.988347	0.994937
WBGene00001601	34.7291	-0.726926	0.245282	-2.96364	0.00304025	0.0243863
WBGene00001602	1.16013	1.17203	1.03836	1.12873	0.259013	0.514461
WBGene00001603	5.34437	3.66734	0.84953	4.3169	1.58237e-05	0.000344348
WBGene00001604	7.0171	-0.906803	0.441504	-2.05389	0.039986	0.157917
WBGene00001605	19.6056	-1.39923	0.332802	-4.20438	2.61803e-05	0.00052797
WBGene00001606	7.20346	-0.342726	0.399325	-0.858263	0.390747	0.646362
WBGene00001607	19.583	0.305635	0.265515	1.1511	0.24969	0.503007
WBGene00001608	2.08603	1.9043	0.917733	2.075	0.0379866	0.15242
WBGene00001609	8.47109	0.0633603	0.428339	0.147921	0.882405	0.95271
WBGene00001612	1.361	1.91051	1.08485	1.76109	0.0782235	0.247372
WBGene00001613	2.15063	-0.923137	0.738348	-1.25027	0.2112	0.457017
WBGene00001614	0.156038	-0.437877	2.45634	-0.178264	0.858516	NA
WBGene00001615	1.41882	1.12414	0.97044	1.15838	0.246707	0.499475
WBGene00001616	0.816552	-0.541153	1.3191	-0.410244	0.681627	NA
WBGene00001617	13.3276	3.59189	0.605402	5.93306	2.97336e-09	2.12253e-07
WBGene00001618	0.826167	2.64358	1.30518	2.02545	0.0428208	NA
WBGene00001619	0.217927	1.43795	2.22524	0.6462	0.51815	NA
WBGene00001620	1.85249	-0.148202	0.727118	-0.203821	0.838494	0.932313
WBGene00001621	0.888837	0.622361	1.08672	0.572696	0.566851	0.782006
WBGene00001622	0.778334	0.519748	1.21927	0.426277	0.669906	NA
WBGene00001623	0.783135	-0.888971	1.29832	-0.684711	0.493526	NA
WBGene00001624	0.791595	0.652207	1.29307	0.504386	0.61399	NA
WBGene00001625	0	NA	NA	NA	NA	NA
WBGene00001626	0.761626	0.310532	1.54702	0.200729	0.840911	NA
WBGene00001627	0.303597	-1.71842	2.03699	-0.843605	0.39889	NA
WBGene00001628	2.97529	1.39446	0.67753	2.05815	0.039576	0.156697
WBGene00001629	2.75642	1.25059	0.671726	1.86176	0.0626365	0.214285
WBGene00001630	8.20242	1.16818	0.457277	2.55465	0.0106293	0.0623615
WBGene00001631	3.42322	0.447897	0.735227	0.609195	0.542395	0.765931
WBGene00001632	4.87383	0.180626	0.508807	0.354999	0.72259	0.875079
WBGene00001633	0.768992	0.682093	1.18131	0.577405	0.563666	NA
WBGene00001635	5.74094	-0.377053	0.486345	-0.775279	0.438175	0.687674
WBGene00001636	2.05087	-0.846136	0.771687	-1.09648	0.272871	0.529088
WBGene00001637	1.22255	0.510724	0.966088	0.528652	0.597047	0.799107
WBGene00001638	2.94777	0.61817	0.687809	0.898753	0.368784	0.627614
WBGene00001639	0.785912	-1.02906	1.3454	-0.764869	0.444349	NA
WBGene00001640	13.4141	0.197572	0.347111	0.56919	0.569227	0.782805
WBGene00001641	0.161707	0.0170774	2.85007	0.00599192	0.995219	NA
WBGene00001642	0.196495	-0.997538	2.69262	-0.370471	0.711032	NA
WBGene00001643	0.399565	1.02642	1.76006	0.583175	0.559775	NA
WBGene00001644	0.609978	1.07078	1.48775	0.719728	0.471693	NA
WBGene00001645	1.76438	0.429182	0.929991	0.46149	0.644447	0.827556
WBGene00001646	0.586592	-1.94716	1.41057	-1.38041	0.167461	NA
WBGene00001647	4.7789	0.0856232	0.47708	0.179474	0.857566	0.941623
WBGene00001648	5.11746	0.364971	0.538871	0.677288	0.498223	0.735183
WBGene00001649	4.88512	0.831102	0.541156	1.53579	0.12459	0.332182
WBGene00001650	4.51697	1.0902	0.512383	2.1277	0.0333618	0.140125
WBGene00001651	7.68018	1.20351	0.505	2.3832	0.0171629	0.0872516
WBGene00001653	8.93891	-0.217427	0.421627	-0.515685	0.606075	0.804438
WBGene00001660	2.96891	-0.309032	0.680347	-0.454226	0.649666	0.831278
WBGene00001661	1.16256	0.302193	1.0158	0.297493	0.766091	0.896206
WBGene00001662	4.25763	-0.163113	0.518796	-0.314407	0.753212	0.889387
WBGene00001663	1.45099	0.382846	0.879552	0.435274	0.663363	0.839339
WBGene00001664	0.396422	-0.00607766	1.76982	-0.00343405	0.99726	NA
WBGene00001665	0.100197	-0.917025	3.11086	-0.294781	0.768161	NA
WBGene00001666	0.42759	0.0294304	1.76007	0.0167212	0.986659	NA
WBGene00001667	0.33178	1.28774	1.80205	0.714597	0.474858	NA
WBGene00001668	0.40193	0.560455	1.63046	0.34374	0.731042	NA
WBGene00001669	0.56124	1.69345	1.49349	1.13388	0.256843	NA
WBGene00001670	0	NA	NA	NA	NA	NA
WBGene00001671	5.97756	0.917222	0.54319	1.68859	0.0912989	0.274652
WBGene00001672	1.03039	-0.52498	1.15272	-0.455429	0.648801	0.830688
WBGene00001673	0.302218	0.933182	2.07975	0.448699	0.653649	NA
WBGene00001674	0.259773	0.512226	2.16438	0.236661	0.812919	NA
WBGene00001675	0.315593	0.501762	1.84668	0.27171	0.785845	NA
WBGene00001676	0	NA	NA	NA	NA	NA
WBGene00001677	0.363984	-0.322825	2.07748	-0.155392	0.876512	NA
WBGene00001678	1.78122	0.829083	0.841566	0.985167	0.324542	0.584381
WBGene00001679	15.0513	1.40942	0.452035	3.11794	0.00182122	0.0163021
WBGene00001680	6.98043	-0.300556	0.41859	-0.718019	0.472746	0.713864
WBGene00001681	0.0618804	0.497967	3.11654	0.159782	0.873053	NA
WBGene00001682	1.60086	2.69865	1.07489	2.51064	0.0120512	0.0680814
WBGene00001683	30.0355	-0.31202	0.236616	-1.31867	0.187278	0.426375
WBGene00001684	5.06011	-0.63231	0.511756	-1.23557	0.216619	0.463767
WBGene00001685	5.97871	-0.275598	0.441335	-0.624464	0.532323	0.759251
WBGene00001686	28.5932	-0.0952915	0.255605	-0.372807	0.709292	0.867481
WBGene00001687	0.967599	0.123946	1.31785	0.0940514	0.925068	0.970745
WBGene00001688	67.5879	-0.954503	0.239986	-3.97733	6.96931e-05	0.00119501
WBGene00001689	17.6138	-0.723665	0.292728	-2.47214	0.0134305	0.0734652
WBGene00001690	0.732335	1.03215	1.61241	0.640132	0.522087	NA
WBGene00001691	1.99932	1.11469	0.791719	1.40794	0.159149	0.385796
WBGene00001692	1.09578	-2.89659	1.36533	-2.12154	0.0338764	0.141693
WBGene00001693	0.0470882	-0.463818	3.11654	-0.148825	0.881692	NA
WBGene00001694	0.568303	0.00238924	1.52247	0.00156932	0.998748	NA
WBGene00001695	0.839322	2.4788	1.41611	1.75043	0.0800449	NA
WBGene00001696	0.782905	-0.236181	1.1604	-0.203534	0.838718	NA
WBGene00001697	0.145275	-0.463818	3.11654	-0.148825	0.881692	NA
WBGene00001698	0.254654	-0.464005	2.14229	-0.216593	0.828526	NA
WBGene00001699	0.0569772	0.497967	3.11654	0.159782	0.873053	NA
WBGene00001700	19.7743	0.912551	0.343249	2.65857	0.00784735	0.0501062
WBGene00001701	0.339284	-0.307421	1.82293	-0.168642	0.866079	NA
WBGene00001702	0.217548	0.49462	2.24485	0.220335	0.82561	NA
WBGene00001703	0.275938	0.979953	2.13692	0.458582	0.646535	NA
WBGene00001704	3.46394	-0.758456	0.621664	-1.22004	0.222449	0.470168
WBGene00001705	468.949	0.667232	0.125289	5.32553	1.00659e-07	4.41475e-06
WBGene00001706	0.136158	0.497967	3.11654	0.159782	0.873053	NA
WBGene00001707	23.3204	0.788065	0.266077	2.96179	0.00305854	0.0244793
WBGene00001708	4.37761	1.00178	0.532764	1.88035	0.0600604	0.207637
WBGene00001709	1.87849	-0.369012	0.874895	-0.421778	0.673187	0.845809
WBGene00001710	0.16095	0.996603	2.85257	0.349371	0.726811	NA
WBGene00001711	0.568236	1.43973	1.40523	1.02455	0.305577	NA
WBGene00001712	2.06031	-0.0359113	0.752554	-0.0477193	0.96194	0.985626
WBGene00001713	1.20208	1.23658	0.987779	1.25188	0.210614	0.456117
WBGene00001714	0.336507	1.98843	2.36456	0.840932	0.400386	NA
WBGene00001715	0.25398	1.54598	2.52681	0.611833	0.540648	NA
WBGene00001716	0.306982	-0.506265	2.05943	-0.245827	0.805816	NA
WBGene00001717	0	NA	NA	NA	NA	NA
WBGene00001718	0.104211	-0.944699	3.1099	-0.303772	0.761302	NA
WBGene00001719	4.39205	-0.579541	0.516117	-1.12289	0.261486	0.517196
WBGene00001720	0.113986	0.0170758	3.11654	0.00547908	0.995628	NA
WBGene00001721	0.202123	-0.765095	2.31108	-0.331056	0.740602	NA
WBGene00001722	0.136158	0.497967	3.11654	0.159782	0.873053	NA
WBGene00001723	1.30382	1.16264	0.925909	1.25568	0.209233	0.454874
WBGene00001724	23.9812	-0.871655	0.249648	-3.49154	0.00048025	0.00577824
WBGene00001725	4.51891	2.72522	0.67151	4.05834	4.94229e-05	0.000895121
WBGene00001726	1.19521	-0.0644488	1.15075	-0.0560059	0.955337	0.982492
WBGene00001727	12.9026	-0.501619	0.357515	-1.40307	0.160595	0.387706
WBGene00001728	0.161707	0.0170774	2.85007	0.00599192	0.995219	NA
WBGene00001729	1.03979	0.876169	1.067	0.821149	0.411561	0.664774
WBGene00001730	0.444321	1.7439	1.67228	1.04283	0.297027	NA
WBGene00001731	0.923441	0.193207	1.11892	0.172673	0.862909	0.944208
WBGene00001732	0.705147	1.17264	1.34993	0.868672	0.385027	NA
WBGene00001733	0.108598	0.497967	3.11654	0.159782	0.873053	NA
WBGene00001734	1.64907	0.632162	0.891374	0.709199	0.478201	0.719011
WBGene00001735	1.2227	1.00727	1.0822	0.930768	0.351974	0.612758
WBGene00001736	0.293477	-0.821636	2.09663	-0.391884	0.695144	NA
WBGene00001737	0.136158	0.497967	3.11654	0.159782	0.873053	NA
WBGene00001738	0.777526	1.1191	1.2658	0.884112	0.376636	NA
WBGene00001739	3.33454	1.01557	0.782156	1.29842	0.194142	0.435422
WBGene00001740	1.16006	0.535088	1.05497	0.507208	0.612009	0.80899
WBGene00001743	4.12839	1.49625	0.618113	2.42067	0.0154918	0.0813498
WBGene00001744	7.98343	-0.78571	0.412532	-1.9046	0.0568315	0.200042
WBGene00001745	11.309	0.859359	0.382528	2.24653	0.0246702	0.113572
WBGene00001746	5.51416	0.447301	0.458055	0.976524	0.328805	0.588662
WBGene00001747	5.31379	-0.00315799	0.495818	-0.00636925	0.994918	0.997145
WBGene00001748	18.2314	-0.397607	0.278126	-1.42959	0.152835	0.37678
WBGene00001749	9.10155	0.723768	0.432168	1.67474	0.0939857	0.279597
WBGene00001750	0	NA	NA	NA	NA	NA
WBGene00001751	0.529364	0.868935	1.70283	0.510288	0.60985	NA
WBGene00001752	0.41728	-0.0133404	1.49052	-0.0089502	0.992859	NA
WBGene00001753	3.44313	1.36188	0.756427	1.80041	0.0717961	0.234254
WBGene00001754	0.403291	2.24237	1.88884	1.18717	0.235161	NA
WBGene00001755	7.24713	0.830438	0.44146	1.88112	0.0599559	0.207362
WBGene00001756	0.0990693	0.497967	3.11654	0.159782	0.873053	NA
WBGene00001757	0.306225	0.511341	2.04987	0.24945	0.803013	NA
WBGene00001758	0.797742	1.23957	1.37938	0.898647	0.368841	NA
WBGene00001759	0.205267	0.0170785	2.64423	0.00645878	0.994847	NA
WBGene00001760	1.88805	2.85043	1.1381	2.50455	0.0122606	0.0688549
WBGene00001761	2.20768	2.73567	0.904603	3.02417	0.00249318	0.0209537
WBGene00001762	0.355275	0.929176	1.76838	0.525439	0.599278	NA
WBGene00001763	0.372592	1.37923	1.61552	0.853739	0.39325	NA
WBGene00001764	0.656651	0.311034	1.48135	0.209966	0.833694	NA
WBGene00001765	0.111683	0.962363	3.11578	0.308867	0.757423	NA
WBGene00001766	0.0531084	-0.463818	3.11654	-0.148825	0.881692	NA
WBGene00001767	0.598941	2.66408	1.63008	1.63433	0.10219	NA
WBGene00001768	6.76199	0.824736	0.481861	1.71156	0.0869773	0.266079
WBGene00001769	0.104065	0.0170758	3.11654	0.00547908	0.995628	NA
WBGene00001770	0.928558	1.96382	1.24391	1.57875	0.114394	0.315599
WBGene00001771	0	NA	NA	NA	NA	NA
WBGene00001772	0.785028	1.48219	1.48779	0.996234	0.319136	NA
WBGene00001773	0.697117	1.02463	1.33433	0.767895	0.44255	NA
WBGene00001774	1.21181	-0.0268376	1.05046	-0.0255486	0.979617	0.992297
WBGene00001775	0.554653	0.07372	1.68984	0.0436254	0.965203	NA
WBGene00001776	0.428353	0.569237	1.77374	0.320925	0.748267	NA
WBGene00001777	0.212954	-0.502929	2.25148	-0.223377	0.823242	NA
WBGene00001778	0.510163	1.81298	1.67808	1.08039	0.279968	NA
WBGene00001779	0.207668	0.995859	2.65847	0.374598	0.70796	NA
WBGene00001780	10.0097	5.82849	0.979458	5.95073	2.66957e-09	1.97002e-07
WBGene00001781	0.515791	1.78058	1.43672	1.23934	0.215221	NA
WBGene00001782	0.594937	2.71641	1.54752	1.75533	0.0792037	NA
WBGene00001783	0.240223	0.501502	2.19016	0.22898	0.818885	NA
WBGene00001784	14.4476	3.51495	0.578348	6.07757	1.22019e-09	9.91321e-08
WBGene00001785	0.235227	0.995507	2.5783	0.38611	0.699415	NA
WBGene00001786	2.05466	2.24351	0.970081	2.31271	0.0207387	0.100148
WBGene00001787	0.475397	2.4175	1.62091	1.49145	0.135844	NA
WBGene00001788	1.44861	2.3232	1.03817	2.23779	0.0252351	0.115425
WBGene00001789	0.22283	1.46461	2.61256	0.560604	0.575068	NA
WBGene00001790	0.537047	0.883842	1.69605	0.521118	0.602285	NA
WBGene00001791	1.17058	-1.60546	1.13349	-1.41638	0.156663	0.381664
WBGene00001792	0.769072	1.66703	1.39158	1.19794	0.23094	NA
WBGene00001793	9.36744	1.05966	0.46379	2.28479	0.0223253	0.10554
WBGene00001794	6.59349	-0.676901	0.471695	-1.43504	0.151276	0.37455
WBGene00001795	3.42037	0.751974	0.692003	1.08666	0.277186	0.534145
WBGene00001796	0.944375	1.79019	1.29644	1.38084	0.167327	0.397201
WBGene00001803	0.375816	1.16542	1.74271	0.668741	0.503661	NA
WBGene00001804	0.590013	-1.88886	1.59302	-1.18571	0.235736	NA
WBGene00001805	0.944478	-0.844378	1.16955	-0.721966	0.470315	0.712426
WBGene00001806	0.259773	0.512226	2.16438	0.236661	0.812919	NA
WBGene00001808	3.77526	0.184666	0.549456	0.336089	0.736804	0.881111
WBGene00001811	4.41375	-1.82294	0.656642	-2.77616	0.00550048	0.0383349
WBGene00001812	4.85014	0.835926	0.586136	1.42616	0.153821	0.377795
WBGene00001813	3.34303	0.20297	0.59869	0.339023	0.734592	0.880536
WBGene00001814	39.6506	1.14445	0.214081	5.34587	8.99859e-08	3.99804e-06
WBGene00001815	6.86451	-0.144124	0.470239	-0.30649	0.759232	0.892303
WBGene00001816	22.2342	-0.262087	0.278109	-0.94239	0.345993	0.607156
WBGene00001817	1.93453	2.28431	0.992853	2.30075	0.0214056	0.102469
WBGene00001818	0.200364	0.0170784	2.66433	0.00641003	0.994886	NA
WBGene00001819	2.87233	1.14915	0.657284	1.74832	0.0804078	0.252037
WBGene00001820	1.55299	1.01594	0.912334	1.11356	0.265469	0.521553
WBGene00001821	0.306463	-0.921939	2.07426	-0.444466	0.656706	NA
WBGene00001823	1.73931	1.13173	0.857552	1.31972	0.186927	0.425961
WBGene00001824	6.33649	0.351644	0.432219	0.813579	0.415886	0.668939
WBGene00001827	5.80216	-0.589787	0.46413	-1.27074	0.203823	0.448294
WBGene00001828	2.33393	1.90045	0.844169	2.25126	0.024369	0.11255
WBGene00001829	37.0476	-1.01987	0.225867	-4.51537	6.32066e-06	0.000160471
WBGene00001830	12.0067	0.0872462	0.33087	0.263687	0.792021	0.909622
WBGene00001831	110.255	-1.02413	0.19798	-5.17291	2.30481e-07	8.97771e-06
WBGene00001832	18.0428	-0.479583	0.290035	-1.65354	0.0982216	0.287881
WBGene00001833	43.0145	-0.653283	0.196727	-3.32077	0.000897702	0.00947168
WBGene00001834	6.42872	0.108315	0.523844	0.206769	0.83619	0.931363
WBGene00001835	2.93295	0.0751637	0.765542	0.0981836	0.921786	0.969136
WBGene00001836	3.59368	-0.409442	0.567264	-0.721784	0.470427	0.712475
WBGene00001837	1.81992	2.30401	0.944002	2.44069	0.0146593	0.0783531
WBGene00001838	1.93371	0.438917	0.723063	0.607025	0.543834	0.766969
WBGene00001839	0.752357	-0.429054	1.31674	-0.325846	0.744541	NA
WBGene00001840	14.2323	-0.466568	0.293055	-1.59208	0.111366	0.31046
WBGene00001841	0.0990693	0.497967	3.11654	0.159782	0.873053	NA
WBGene00001842	0.384537	1.42509	1.76965	0.805297	0.420648	NA
WBGene00001843	2.70507	0.338844	0.716485	0.472926	0.636266	0.822935
WBGene00001844	1.06359	0.925257	1.09156	0.847643	0.396637	0.651148
WBGene00001851	5.15461	0.728925	0.514691	1.41624	0.156706	0.381664
WBGene00001852	0.587599	-0.102081	1.71751	-0.0594354	0.952605	NA
WBGene00001853	3.55856	0.816947	0.758997	1.07635	0.281771	0.539115
WBGene00001854	5.9161	-0.286171	0.540348	-0.529605	0.596386	0.798473
WBGene00001855	12.4133	-0.648943	0.360997	-1.79764	0.0722338	0.235322
WBGene00001856	10.1432	1.88171	0.428108	4.3954	1.10569e-05	0.000255959
WBGene00001857	0.925944	-1.66451	1.14987	-1.44756	0.14774	0.368832
WBGene00001858	2.28947	3.25292	0.933249	3.48559	0.000491054	0.00588334
WBGene00001859	4.0533	-0.343513	0.603574	-0.569131	0.569267	0.782805
WBGene00001860	9.60033	-0.254174	0.406671	-0.62501	0.531965	0.75904
WBGene00001862	3.89397	-0.995032	0.575135	-1.73008	0.0836153	0.259233
WBGene00001863	9.79488	0.0956433	0.406	0.235575	0.813763	0.920785
WBGene00001864	1.45378	0.153771	0.90316	0.170258	0.864807	0.944929
WBGene00001865	4.49834	-0.56346	0.512363	-1.09973	0.27145	0.527849
WBGene00001867	1.08685	0.949168	1.00272	0.946597	0.343844	0.604864
WBGene00001869	3.19736	-0.725548	0.678656	-1.0691	0.285027	0.542544
WBGene00001872	5.98087	-0.160223	0.442812	-0.361832	0.717477	0.872355
WBGene00001874	5.5071	0.466951	0.529363	0.8821	0.377723	0.635097
WBGene00001875	15.733	0.213443	0.334251	0.63857	0.523103	0.752638
WBGene00001876	5.39708	0.855715	0.468322	1.82719	0.0676706	0.22545
WBGene00001877	9.82673	0.0165046	0.384874	0.042883	0.965795	0.987204
WBGene00001878	11.7692	-0.139024	0.39454	-0.352369	0.724562	0.8761
WBGene00001879	25.9311	0.131221	0.298126	0.440153	0.659826	0.837409
WBGene00001880	2.70565	0.236734	0.727055	0.325607	0.744722	0.884463
WBGene00001881	12.3812	0.0316842	0.345842	0.0916146	0.927004	0.97145
WBGene00001882	0.609422	-0.347808	1.32562	-0.262374	0.793033	NA
WBGene00001883	21.6237	0.670308	0.289915	2.31208	0.0207731	0.100257
WBGene00001884	0.449224	1.77606	1.50013	1.18393	0.236439	NA
WBGene00001885	26.2873	0.0820675	0.258061	0.318016	0.750473	0.888167
WBGene00001886	0.788931	3.10711	1.52181	2.04173	0.0411787	NA
WBGene00001887	22.1935	0.938672	0.285584	3.28685	0.00101314	0.0103691
WBGene00001888	0.536917	1.96037	1.48802	1.31744	0.187692	NA
WBGene00001889	18.4805	0.0143186	0.35907	0.0398769	0.968191	0.988174
WBGene00001890	1.51972	0.257266	0.898527	0.28632	0.774633	0.900763
WBGene00001891	3.581	0.0389999	0.617487	0.0631591	0.94964	0.980233
WBGene00001892	24.0776	-0.15401	0.278909	-0.552188	0.58082	0.788837
WBGene00001893	12.5223	0.487803	0.451782	1.07973	0.280261	0.537308
WBGene00001894	0.352704	1.4215	2.00427	0.709233	0.47818	NA
WBGene00001895	0.604425	-0.0389658	1.373	-0.02838	0.977359	NA
WBGene00001896	26.1622	-0.226581	0.271517	-0.834499	0.404	0.65782
WBGene00001898	11.0845	-0.040457	0.36737	-0.110126	0.912309	0.964966
WBGene00001899	11.0381	0.989309	0.409141	2.41802	0.0156054	0.0817703
WBGene00001900	21.0775	0.516816	0.308343	1.6761	0.0937177	0.279043
WBGene00001901	15.3684	0.433048	0.370756	1.16802	0.2428	0.494263
WBGene00001902	4.30141	0.0873974	0.516536	0.169199	0.86564	0.944929
WBGene00001903	0.310479	-1.29284	2.06498	-0.626078	0.531264	NA
WBGene00001904	12.194	0.0573322	0.352313	0.162731	0.87073	0.947177
WBGene00001905	3.49373	0.674666	0.62237	1.08403	0.278352	0.535318
WBGene00001906	17.0052	0.417079	0.327308	1.27427	0.202567	0.446743
WBGene00001907	0.478055	-0.630549	1.54423	-0.408326	0.683035	NA
WBGene00001908	20.7445	-0.122852	0.323193	-0.380118	0.703858	0.864115
WBGene00001909	4.54123	0.0878374	0.514927	0.170582	0.864552	0.944915
WBGene00001910	3.91162	0.392222	0.664783	0.589999	0.555191	0.773993
WBGene00001911	20.9027	0.353524	0.291376	1.21329	0.225019	0.472731
WBGene00001912	1.87984	-0.10426	0.851338	-0.122466	0.90253	0.960097
WBGene00001913	5.90683	0.70447	0.474909	1.48338	0.137974	0.353555
WBGene00001914	39.4867	0.035587	0.295478	0.120439	0.904135	0.961028
WBGene00001915	1.61906	1.11614	0.898062	1.24283	0.213932	0.460463
WBGene00001916	2.12773	0.39454	0.74459	0.529876	0.596198	0.798409
WBGene00001917	23.0472	0.0739549	0.287479	0.257253	0.796983	0.912573
WBGene00001918	0.736866	-0.247744	1.53293	-0.161615	0.871609	NA
WBGene00001919	62.8476	-0.00427387	0.250176	-0.0170835	0.98637	0.99413
WBGene00001920	1.11053	-0.512724	1.07549	-0.476736	0.63355	0.821541
WBGene00001921	3.78617	-0.11569	0.562044	-0.205838	0.836917	0.931573
WBGene00001922	87.928	0.111523	0.209483	0.532371	0.594469	0.797266
WBGene00001923	17.2587	-0.599328	0.345381	-1.73527	0.0826935	0.257289
WBGene00001924	4.52207	0.166261	0.505488	0.328912	0.742222	0.882504
WBGene00001925	0.467691	0.919589	1.47529	0.623326	0.53307	NA
WBGene00001926	23.9913	0.111581	0.287938	0.387519	0.698372	0.860843
WBGene00001927	11.5145	0.0265358	0.398514	0.0665867	0.946911	0.97938
WBGene00001928	0.44084	-1.0461	1.74989	-0.597807	0.549969	NA
WBGene00001929	0.99201	0.668607	1.04718	0.638486	0.523157	0.752638
WBGene00001930	41.2846	0.264433	0.241024	1.09712	0.272588	0.528778
WBGene00001931	44.1001	0.154547	0.235101	0.657366	0.510946	0.745064
WBGene00001932	7.9079	0.0558437	0.487765	0.114489	0.90885	0.963698
WBGene00001933	52.1038	0.357401	0.230973	1.54737	0.121773	0.328012
WBGene00001934	17.7974	0.306874	0.307859	0.996801	0.318861	0.57951
WBGene00001935	9.60303	-0.131331	0.412922	-0.318052	0.750446	0.888167
WBGene00001936	36.0581	0.172193	0.294806	0.58409	0.55916	0.776629
WBGene00001937	4.14422	0.18164	0.596326	0.304599	0.760671	0.892577
WBGene00001938	47.1029	0.0496636	0.272305	0.182382	0.855283	0.940315
WBGene00001939	31.6266	0.0672689	0.286034	0.235178	0.81407	0.921019
WBGene00001940	5.90581	-0.0842403	0.513803	-0.163955	0.869767	0.946666
WBGene00001941	10.264	0.0538687	0.382539	0.140819	0.888013	0.954981
WBGene00001942	12.4148	-0.42756	0.371521	-1.15084	0.249799	0.50307
WBGene00001943	0.964945	1.01883	1.29694	0.78557	0.432119	0.682687
WBGene00001944	0.468171	1.7313	1.71801	1.00774	0.313581	NA
WBGene00001945	1.14735	0.488796	0.989893	0.493786	0.621457	0.814964
WBGene00001946	9.85745	0.361202	0.34832	1.03698	0.299745	0.55988
WBGene00001947	8.63181	0.573886	0.378775	1.51511	0.129745	0.341002
WBGene00001948	1.05483	1.19313	1.04544	1.14127	0.253757	0.507544
WBGene00001949	1.46444	-0.243841	0.88116	-0.276727	0.78199	0.904685
WBGene00001950	0.53376	1.24137	1.49201	0.832011	0.405403	NA
WBGene00001951	0	NA	NA	NA	NA	NA
WBGene00001952	0.0521055	-0.463818	3.11654	-0.148825	0.881692	NA
WBGene00001953	0.113986	0.0170758	3.11654	0.00547908	0.995628	NA
WBGene00001954	0.16095	0.996603	2.85257	0.349371	0.726811	NA
WBGene00001955	1.74393	0.333609	0.877976	0.379975	0.703964	0.864115
WBGene00001956	0	NA	NA	NA	NA	NA
WBGene00001957	0.272315	0.997029	2.9826	0.334282	0.738167	NA
WBGene00001958	0.605323	0.920251	1.40462	0.655159	0.512366	NA
WBGene00001959	0.136158	0.497967	3.11654	0.159782	0.873053	NA
WBGene00001960	2.66434	-0.597802	0.648701	-0.921537	0.35677	0.617203
WBGene00001961	0.151073	-0.991156	2.90713	-0.34094	0.733149	NA
WBGene00001962	0.143387	-0.463818	3.11654	-0.148825	0.881692	NA
WBGene00001963	2.10931	-0.390026	0.727019	-0.536473	0.591632	0.795896
WBGene00001964	0.108598	0.497967	3.11654	0.159782	0.873053	NA
WBGene00001965	1.53461	2.54478	1.31743	1.93163	0.0534058	0.191683
WBGene00001966	0.199228	0.0170784	2.66908	0.0063986	0.994895	NA
WBGene00001967	0.0618804	0.497967	3.11654	0.159782	0.873053	NA
WBGene00001968	0	NA	NA	NA	NA	NA
WBGene00001971	11.9763	0.631064	0.329581	1.91474	0.0555251	0.196865
WBGene00001972	18.1879	0.413167	0.298573	1.38381	0.166418	0.39577
WBGene00001973	99.7139	-1.17117	0.195885	-5.97886	2.24708e-09	1.68888e-07
WBGene00001974	7.88144	0.398515	0.401971	0.991402	0.321489	0.581628
WBGene00001975	1.74741	0.763206	0.796555	0.958134	0.337995	0.598127
WBGene00001976	7.07332	-0.246447	0.419749	-0.587128	0.557118	0.775647
WBGene00001977	80.6075	-0.57365	0.209434	-2.73905	0.00616165	0.0416332
WBGene00001978	7.84197	0.727082	0.384207	1.89242	0.0584345	0.203829
WBGene00001979	7.26072	0.264041	0.441709	0.597771	0.549993	0.770523
WBGene00001980	26.4767	0.559539	0.263127	2.12649	0.0334621	0.140408
WBGene00001981	0.227807	0.871043	1.96139	0.444094	0.656975	NA
WBGene00001983	5.4483	0.252919	0.48233	0.52437	0.600021	0.801015
WBGene00001984	0.16866	1.30995	2.84407	0.46059	0.645093	NA
WBGene00001985	2.1972	-1.86473	0.867193	-2.15031	0.0315308	0.134588
WBGene00001986	2.09053	0.134575	0.954764	0.140951	0.887908	0.954981
WBGene00001987	1.04961	1.673	1.10229	1.51774	0.129079	0.339691
WBGene00001988	0.0618804	0.497967	3.11654	0.159782	0.873053	NA
WBGene00001989	0.397058	-0.324667	1.64203	-0.197723	0.843262	NA
WBGene00001990	0.152178	0.0170771	2.90597	0.00587655	0.995311	NA
WBGene00001991	0.0531084	-0.463818	3.11654	-0.148825	0.881692	NA
WBGene00001992	0.685975	1.1719	1.4101	0.83107	0.405934	NA
WBGene00001993	6.38246	0.0942822	0.476841	0.197723	0.843262	0.935018
WBGene00001994	23.8286	1.32867	0.315456	4.2119	2.53236e-05	0.000515568
WBGene00001995	0.906726	-0.620986	1.16397	-0.533508	0.593682	0.796845
WBGene00001996	2.97693	-0.0564936	0.65899	-0.0857276	0.931683	0.974025
WBGene00001997	7.87037	-0.637115	0.389234	-1.63684	0.101664	0.294379
WBGene00001998	3.46738	-0.21332	0.603719	-0.353343	0.723831	0.87596
WBGene00001999	19.4035	0.500013	0.335114	1.49207	0.135682	0.350207
WBGene00002000	15.7941	-0.328011	0.30689	-1.06882	0.28515	0.542599
WBGene00002001	4.73547	0.192592	0.513844	0.374806	0.707805	0.866801
WBGene00002002	2.14017	0.835105	0.846836	0.986148	0.32406	0.583884
WBGene00002003	2.34206	0.697929	0.724896	0.962799	0.335648	0.595566
WBGene00002004	4.33974	0.758305	0.52843	1.43502	0.151282	0.37455
WBGene00002005	76.9422	-0.662779	0.216488	-3.06151	0.00220226	0.0190435
WBGene00002006	3.31894	-0.650641	0.570948	-1.13958	0.254462	0.508587
WBGene00002007	24.0872	0.259983	0.278455	0.933664	0.350477	0.611446
WBGene00002008	10.6649	-0.134834	0.322823	-0.417672	0.676187	0.847332
WBGene00002010	18.1444	-0.062761	0.284019	-0.220975	0.825112	0.926119
WBGene00002011	7.69727	-1.31824	0.487313	-2.70512	0.00682806	0.04517
WBGene00002012	0.942263	0.704406	1.1515	0.611729	0.540717	0.764711
WBGene00002013	0.70229	1.74434	1.42604	1.2232	0.221254	NA
WBGene00002015	5.06961	4.79433	1.0224	4.68927	2.74178e-06	8.02358e-05
WBGene00002016	1.38322	1.23133	1.21906	1.01007	0.312464	0.572478
WBGene00002017	11.5569	0.772718	0.629384	1.22774	0.219546	0.467392
WBGene00002018	0.661792	0.834505	1.46687	0.568903	0.569422	NA
WBGene00002019	2.84489	0.797525	0.804163	0.991746	0.321322	0.581628
WBGene00002020	0.284465	0.97977	2.1205	0.462046	0.644048	NA
WBGene00002021	3.59621	2.88978	0.760739	3.79864	0.00014549	0.00219276
WBGene00002023	4.17949	0.788982	0.569636	1.38506	0.166033	0.395295
WBGene00002024	3.18695	-0.174953	0.613207	-0.285307	0.775409	0.901085
WBGene00002025	24.8973	-0.495761	0.261111	-1.89866	0.0576093	0.201905
WBGene00002026	0.322231	0.0409582	2.13973	0.0191418	0.984728	NA
WBGene00002027	16.6251	-0.248681	0.289809	-0.858086	0.390845	0.646395
WBGene00002028	2.19603	-0.205314	0.829039	-0.247652	0.804403	0.916438
WBGene00002029	0.822186	1.34014	1.44386	0.928168	0.35332	NA
WBGene00002030	0	NA	NA	NA	NA	NA
WBGene00002031	1.27632	0.94156	0.984605	0.956281	0.33893	0.599283
WBGene00002032	25.5546	-0.555564	0.303461	-1.83076	0.0671368	0.223978
WBGene00002033	4.39138	-0.430805	0.544652	-0.790974	0.428959	0.680072
WBGene00002034	6.78529	0.380096	0.464775	0.817807	0.413467	0.66643
WBGene00002035	6.53508	0.157138	0.420579	0.373623	0.708685	0.867261
WBGene00002036	36.3197	-0.423198	0.21196	-1.9966	0.0458688	0.172943
WBGene00002037	7.30133	2.64443	0.64946	4.07173	4.66656e-05	0.000852421
WBGene00002038	3.34591	1.47699	0.740179	1.99545	0.0459942	0.173259
WBGene00002039	39.6112	1.30786	0.395516	3.3067	0.000944008	0.00984457
WBGene00002040	4.39346	0.121937	0.58399	0.208801	0.834604	0.930604
WBGene00002041	6.72835	1.46607	0.489066	2.99769	0.00272038	0.0223244
WBGene00002042	0.713526	-0.553194	1.23642	-0.447415	0.654576	NA
WBGene00002043	5.78698	1.96878	0.590881	3.33194	0.000862417	0.00916741
WBGene00002044	1.63285	0.411702	0.838757	0.490848	0.623534	0.816058
WBGene00002045	15.5132	-0.130014	0.297466	-0.437073	0.662058	0.838558
WBGene00002046	2.1974	0.745676	0.720761	1.03457	0.300871	0.560956
WBGene00002047	23.2922	-0.784667	0.243785	-3.21868	0.0012878	0.0124061
WBGene00002048	3.53158	1.2064	0.64661	1.86574	0.0620782	0.21276
WBGene00002050	0.734379	0.0106125	1.31126	0.00809337	0.993542	NA
WBGene00002051	1.26181	0.479851	0.914003	0.524999	0.599584	0.800744
WBGene00002052	3.67961	-0.735338	0.614295	-1.19704	0.231289	0.480168
WBGene00002053	4.77575	-0.0768534	0.558493	-0.137608	0.89055	0.956024
WBGene00002054	4.97594	1.66688	0.596331	2.79523	0.00518635	0.0366851
WBGene00002055	1.18001	0.0457494	1.01318	0.0451543	0.963984	0.986487
WBGene00002056	10.4995	2.62069	0.449925	5.82473	5.72065e-09	3.85686e-07
WBGene00002057	1.40887	0.561667	0.984446	0.570541	0.568311	0.782119
WBGene00002058	2.56477	1.09256	0.702753	1.55468	0.120022	0.324715
WBGene00002059	3.27091	0.00644546	0.612711	0.0105196	0.991607	0.995825
WBGene00002060	1.17697	0.440605	0.999987	0.440611	0.659495	0.837161
WBGene00002061	11.565	-0.399336	0.346274	-1.15324	0.248813	0.501831
WBGene00002062	0.444391	-0.70323	1.72507	-0.407654	0.683528	NA
WBGene00002063	6.49412	-0.392901	0.490584	-0.800885	0.423198	0.675478
WBGene00002064	19.8838	-0.468278	0.287484	-1.62888	0.103338	0.297322
WBGene00002065	6.07853	0.814873	0.523292	1.5572	0.119422	0.323977
WBGene00002066	20.4204	-0.187435	0.306708	-0.611118	0.541122	0.764879
WBGene00002067	0.986723	0.63235	1.12279	0.563195	0.573302	0.785
WBGene00002068	6.59516	-0.123679	0.500903	-0.246912	0.804976	0.916802
WBGene00002069	1.95889	0.711445	0.79917	0.89023	0.373343	0.631581
WBGene00002070	3.96352	-0.100988	0.593649	-0.170115	0.86492	0.944929
WBGene00002071	0.858578	0.20993	1.20082	0.174823	0.861219	NA
WBGene00002072	4.05741	-0.695283	0.539095	-1.28972	0.197147	0.439734
WBGene00002073	13.4084	-0.360649	0.392187	-0.919586	0.357789	0.618194
WBGene00002074	12.3025	0.170936	0.321353	0.531927	0.594776	0.797333
WBGene00002075	9.33425	-0.326388	0.408422	-0.799145	0.424207	0.675934
WBGene00002076	9.55653	-0.159815	0.366432	-0.436138	0.662737	0.839044
WBGene00002077	25.474	0.18184	0.303121	0.599894	0.548577	0.770046
WBGene00002078	29.4837	-0.00593676	0.229236	-0.0258981	0.979339	0.992297
WBGene00002079	8.86677	0.752078	0.421322	1.78504	0.0742547	0.239663
WBGene00002080	6.27832	0.773085	0.481874	1.60433	0.108641	0.306039
WBGene00002081	4.34853	0.715816	0.567999	1.26024	0.207583	0.453017
WBGene00002083	20.6763	-0.338049	0.25173	-1.3429	0.179303	0.415272
WBGene00002084	0.156047	0.983015	2.88125	0.341177	0.73297	NA
WBGene00002085	0.212809	-0.463611	2.65305	-0.174747	0.861279	NA
WBGene00002086	0	NA	NA	NA	NA	NA
WBGene00002087	0.511105	1.9914	1.43851	1.38436	0.166249	NA
WBGene00002088	0.29621	0.0145666	2.1057	0.00691769	0.994481	NA
WBGene00002089	0.0989679	-0.463818	3.11654	-0.148825	0.881692	NA
WBGene00002090	0.291068	1.52872	2.09082	0.731155	0.464684	NA
WBGene00002091	0.0558413	0.497967	3.11654	0.159782	0.873053	NA
WBGene00002092	0.0990693	0.497967	3.11654	0.159782	0.873053	NA
WBGene00002093	0.39927	-1.19505	1.71429	-0.697109	0.485734	NA
WBGene00002094	0.475296	2.39408	1.48079	1.61675	0.105932	NA
WBGene00002095	0	NA	NA	NA	NA	NA
WBGene00002096	0.306986	-1.05284	2.05847	-0.51147	0.609022	NA
WBGene00002097	0.214815	-0.476281	2.64499	-0.180069	0.857098	NA
WBGene00002098	0.170479	0.996421	2.80171	0.355648	0.722104	NA
WBGene00002099	0.665725	2.83648	1.57119	1.80531	0.0710264	NA
WBGene00002100	2.06634	0.819833	0.909652	0.901261	0.36745	0.626361
WBGene00002101	0.259918	1.46391	2.49595	0.586513	0.557531	NA
WBGene00002102	9.57304	1.10554	0.435519	2.53844	0.0111349	0.0644191
WBGene00002103	0.330718	0.629729	2.08503	0.302024	0.762634	NA
WBGene00002104	0	NA	NA	NA	NA	NA
WBGene00002105	0	NA	NA	NA	NA	NA
WBGene00002106	0.212664	0.50159	2.25855	0.222085	0.824248	NA
WBGene00002107	0.554466	2.06878	1.46056	1.41643	0.15665	NA
WBGene00002108	0.108598	0.497967	3.11654	0.159782	0.873053	NA
WBGene00002109	0.520694	0.992019	1.5591	0.636275	0.524597	NA
WBGene00002110	0.160704	0.0170774	2.85572	0.00598005	0.995229	NA
WBGene00002111	0.16095	0.996603	2.85257	0.349371	0.726811	NA
WBGene00002112	0.0521055	-0.463818	3.11654	-0.148825	0.881692	NA
WBGene00002113	0.434112	0.957299	1.59732	0.599316	0.548962	NA
WBGene00002114	0.992152	-0.337118	1.12293	-0.300213	0.764015	0.895005
WBGene00002115	0.235227	0.995507	2.5783	0.38611	0.699415	NA
WBGene00002116	13.1658	-0.182823	0.321665	-0.568366	0.569787	0.783015
WBGene00002117	0.431196	0.653715	1.76208	0.37099	0.710645	NA
WBGene00002118	0	NA	NA	NA	NA	NA
WBGene00002119	1.10187	0.829386	1.11243	0.745562	0.455932	0.701475
WBGene00002120	1.39702	1.8675	1.04784	1.78223	0.0747116	0.24041
WBGene00002121	0	NA	NA	NA	NA	NA
WBGene00002123	1.07972	0.43801	1.02694	0.426519	0.66973	0.843267
WBGene00002124	2.98331	0.747151	0.661068	1.13022	0.258384	0.51384
WBGene00002125	5.12064	0.593186	0.528199	1.12304	0.261423	0.517196
WBGene00002127	2.17093	0.649372	0.771006	0.84224	0.399654	0.653787
WBGene00002128	0.492966	1.75565	1.67932	1.04545	0.295813	NA
WBGene00002129	16.2189	-1.5155	0.329116	-4.60475	4.12961e-06	0.00011316
WBGene00002130	4.74361	-0.679475	0.647786	-1.04892	0.294215	0.553125
WBGene00002131	2.4007	0.61644	0.716935	0.859827	0.389884	0.64587
WBGene00002132	1.47072	2.86915	1.04176	2.75415	0.00588449	0.0401098
WBGene00002133	0.755386	-0.119747	1.46329	-0.0818342	0.934779	NA
WBGene00002134	1.42185	0.885667	0.977271	0.906266	0.364795	0.624125
WBGene00002135	1.71883	0.76142	0.8418	0.904514	0.365723	0.624897
WBGene00002136	35.5059	-0.0297592	0.200245	-0.148614	0.881858	0.952538
WBGene00002137	2.01717	2.38054	0.873575	2.72505	0.00642909	0.0430245
WBGene00002138	1.37953	1.74012	1.06318	1.63671	0.101691	0.294389
WBGene00002139	3.00306	0.992467	0.616187	1.61066	0.107254	0.304111
WBGene00002140	0.444382	1.5292	1.74238	0.87765	0.380134	NA
WBGene00002141	2.45389	1.28999	0.720986	1.7892	0.073582	0.238123
WBGene00002142	0.681339	0.684696	1.30961	0.522824	0.601096	NA
WBGene00002143	1.64198	0.8368	0.824266	1.01521	0.310008	0.57037
WBGene00002144	2.87862	0.521381	0.653346	0.798016	0.424861	0.67655
WBGene00002146	0.577561	-0.635733	1.40018	-0.454036	0.649803	NA
WBGene00002147	6.40027	0.409698	0.500142	0.819163	0.412693	0.665602
WBGene00002148	5.44207	0.290745	0.491419	0.591644	0.554089	0.773442
WBGene00002149	0.881372	2.6916	1.196	2.25051	0.0244164	0.112738
WBGene00002150	1.43661	1.04436	1.05087	0.993803	0.320319	0.580514
WBGene00002151	1.3263	0.56698	1.14784	0.493954	0.621339	0.814964
WBGene00002152	15.4805	0.0419558	0.333021	0.125986	0.899743	0.959168
WBGene00002153	3.67433	0.715875	0.580808	1.23255	0.217744	0.465273
WBGene00002162	7.09993	0.0639047	0.42559	0.150156	0.880642	0.952218
WBGene00002163	0.978767	1.12535	1.11779	1.00676	0.31405	0.574277
WBGene00002169	10.645	-0.289208	0.376531	-0.768087	0.442436	0.691308
WBGene00002173	11.4851	0.650027	0.372742	1.74391	0.0811756	0.25389
WBGene00002174	5.32525	2.43385	0.58598	4.15348	3.27463e-05	0.000636175
WBGene00002175	5.88468	1.44658	0.546531	2.64683	0.00812497	0.0513761
WBGene00002176	3.51399	1.94945	0.706763	2.75828	0.00581058	0.0397491
WBGene00002177	78.0748	0.134103	0.191381	0.700711	0.483484	0.723635
WBGene00002178	0.868448	-0.849081	1.10839	-0.766052	0.443645	0.691994
WBGene00002179	3.31433	1.57286	0.704117	2.23381	0.0254959	0.116203
WBGene00002180	2.5109	0.292169	0.70799	0.412674	0.679845	0.849297
WBGene00002181	20.7372	1.12157	0.944195	1.18786	0.234889	0.485397
WBGene00002182	0.28244	-0.770273	2.11205	-0.364704	0.715332	NA
WBGene00002183	6.43204	-1.30298	0.544156	-2.3945	0.0166432	0.0855013
WBGene00002184	16.0255	-1.22739	0.332204	-3.69469	0.000220154	0.00308126
WBGene00002185	12.8426	0.11193	0.395064	0.283322	0.77693	0.901748
WBGene00002186	0.819828	-0.197024	1.2275	-0.160508	0.872481	NA
WBGene00002187	1.1729	0.221425	1.06259	0.208383	0.83493	0.930786
WBGene00002188	0.379532	0.44289	1.61973	0.273434	0.784519	NA
WBGene00002189	3.61571	2.01694	0.659741	3.05716	0.00223444	0.0192632
WBGene00002190	4.93966	1.1478	0.59496	1.9292	0.0537064	0.192335
WBGene00002191	6.33142	0.489193	0.53671	0.911467	0.362049	0.621398
WBGene00002192	8.1006	0.419862	0.422465	0.993839	0.320301	0.580514
WBGene00002193	0.966501	0.22882	1.20725	0.189538	0.849671	0.938041
WBGene00002194	0.35443	-0.0151405	1.80243	-0.00840007	0.993298	NA
WBGene00002195	0.602701	2.03418	1.38782	1.46574	0.14272	NA
WBGene00002196	4.49938	0.140912	0.519576	0.271206	0.786232	0.906775
WBGene00002198	3.15713	1.9682	0.709228	2.77513	0.00551788	0.0383934
WBGene00002199	0.438753	-0.184848	1.79766	-0.102827	0.918101	NA
WBGene00002200	1.17179	-0.0238848	1.08552	-0.0220031	0.982445	0.993392
WBGene00002201	9.76392	-0.416695	0.352574	-1.18186	0.23726	0.488109
WBGene00002202	10.4399	0.240479	0.367531	0.65431	0.512912	0.746528
WBGene00002203	5.16598	1.19046	0.521951	2.28078	0.0225616	0.10645
WBGene00002204	0.271035	0.955134	1.88318	0.507191	0.612021	NA
WBGene00002205	0.0618804	0.497967	3.11654	0.159782	0.873053	NA
WBGene00002206	0.554203	0.894753	1.54187	0.580302	0.561711	NA
WBGene00002207	2.74837	0.56174	0.714611	0.786078	0.431822	0.682383
WBGene00002208	0.778173	0.154266	1.23977	0.124431	0.900974	NA
WBGene00002210	6.34674	1.73741	0.565761	3.07092	0.00213399	0.0185471
WBGene00002211	0	NA	NA	NA	NA	NA
WBGene00002212	0.508534	0.921708	1.45688	0.632657	0.526958	NA
WBGene00002213	1.44241	1.90035	1.03567	1.83491	0.0665195	0.222789
WBGene00002214	6.29493	-1.12578	0.476059	-2.3648	0.0180399	0.0906029
WBGene00002215	4.94121	1.23072	0.518277	2.37465	0.0175658	0.0887707
WBGene00002216	0.847898	-0.88873	1.62511	-0.546875	0.584465	NA
WBGene00002217	4.94659	1.28579	0.548016	2.34626	0.0189628	0.0938567
WBGene00002218	1.99563	1.28324	0.857102	1.49718	0.134346	0.348234
WBGene00002219	204.604	-0.966622	0.200721	-4.81575	1.46648e-06	4.67657e-05
WBGene00002220	2.67289	0.188346	0.707012	0.266397	0.789933	0.908524
WBGene00002221	108.466	0.234372	0.220254	1.0641	0.287285	0.545081
WBGene00002222	2.36332	1.79885	0.825222	2.17983	0.0292698	0.12788
WBGene00002223	11.8731	0.277588	0.358569	0.774156	0.438839	0.688399
WBGene00002224	0.552951	1.39698	1.38271	1.01032	0.312342	NA
WBGene00002225	91.9653	-0.380697	0.205575	-1.85186	0.0640456	0.217231
WBGene00002226	158.589	-0.402093	0.205473	-1.95691	0.0503577	0.184842
WBGene00002227	2.89384	-0.403094	0.647804	-0.622246	0.53378	0.75997
WBGene00002228	130.483	0.137897	0.204872	0.673089	0.500891	0.737198
WBGene00002229	38.807	-0.59272	0.251096	-2.36053	0.0182488	0.0912493
WBGene00002230	2.38946	1.11167	0.828471	1.34183	0.179651	0.415766
WBGene00002231	9.09812	-0.0998779	0.358116	-0.278898	0.780323	0.903638
WBGene00002232	41.1067	0.758736	0.209212	3.62664	0.000287138	0.00384828
WBGene00002233	2.35909	-0.186039	0.675319	-0.275484	0.782945	0.904921
WBGene00002234	0.858412	1.25112	1.21936	1.02604	0.30487	NA
WBGene00002235	0.397622	1.65733	1.6992	0.975355	0.329384	NA
WBGene00002238	9.23988	-0.278674	0.441868	-0.630673	0.528254	0.756023
WBGene00002239	2.70944	0.366496	0.632394	0.579537	0.562227	0.778837
WBGene00002240	4.32018	0.709119	0.531618	1.33389	0.18224	0.419822
WBGene00002241	4.38541	-0.145033	0.585635	-0.24765	0.804405	0.916438
WBGene00002242	0.857441	0.784114	1.14812	0.682954	0.494636	NA
WBGene00002243	3.35781	0.709687	0.666769	1.06437	0.287163	0.545031
WBGene00002244	10.771	-0.132776	0.339847	-0.390695	0.696023	0.859624
WBGene00002245	4.23382	-0.0947031	0.530557	-0.178497	0.858332	0.94204
WBGene00002246	0.575394	0.857915	1.69879	0.505015	0.613548	NA
WBGene00002247	10.1368	0.468101	0.411231	1.13829	0.254999	0.509431
WBGene00002248	9.58051	0.729006	0.378849	1.92426	0.0543217	0.193969
WBGene00002249	3.63971	0.139378	0.569304	0.244822	0.806594	0.917442
WBGene00002250	9.61054	-0.454882	0.354897	-1.28173	0.199938	0.443697
WBGene00002251	8.70783	0.197152	0.403723	0.488334	0.625313	0.817161
WBGene00002252	3.30106	0.652927	0.604436	1.08023	0.280042	0.537133
WBGene00002253	3.79447	0.537397	0.591753	0.908143	0.363803	0.622989
WBGene00002254	6.18931	-0.625518	0.474948	-1.31702	0.187831	0.427069
WBGene00002255	1.71117	-1.00367	0.869387	-1.15446	0.248311	0.501175
WBGene00002256	1.17867	-1.40888	1.11115	-1.26795	0.204817	0.449427
WBGene00002257	1.30312	2.11303	1.09265	1.93387	0.0531295	0.191123
WBGene00002258	2.18483	-1.1271	0.814029	-1.3846	0.166175	0.395524
WBGene00002259	0.988297	2.32135	1.17311	1.97879	0.0478394	0.178154
WBGene00002260	0.160848	0.0170774	2.8549	0.00598176	0.995227	NA
WBGene00002261	1.60206	0.282481	0.841002	0.335886	0.736957	0.881111
WBGene00002262	3.03332	-1.28589	0.660786	-1.94601	0.051654	0.187744
WBGene00002263	33.3205	0.971209	0.375451	2.58678	0.00968769	0.058569
WBGene00002264	10.9296	0.325002	0.333571	0.974309	0.329903	0.589525
WBGene00002265	42.134	2.84924	0.381998	7.45877	8.7331e-14	1.71259e-11
WBGene00002266	1.63159	1.82566	0.958474	1.90475	0.0568121	0.200015
WBGene00002267	0.954505	-0.267827	1.17692	-0.227565	0.819984	0.923517
[truncated: 44,911 more rows]
